# Supplementary material for: Long-term atmospheric deposition of nitrogen, phosphorus and sulfate in a large oligotrophic lake
Source: PeerJ. 2015 Mar 19;3:e841. doi: 10.7717/peerj.841 (PMC4369344; doi:10.7717/peerj.841)
Supplement: Supplemental Information 1 — This data file includes the following: nutrient and sulfate concentrations in atmospheric deposition at the Flathead Lake Biological Station (FLBS) and two other lake basins in the region, precipitation volume at the NOAA site at the FLBS, principal fine aerosol species data from the IMPROVE FLAT1 site, wildfire start dates and hectares burned on Flathead National Forest and Montana Department of Natural Resources and Conservation lands, aerosol particulate matter <10 um concentrations for Kalispell, Montana, daily aerosol index values for the region centered over Flathead Lake, and frequency of air inversions in the Flathead Lake basin. [file peerj-03-841-s001.xls]

## Sheet: Precip concentration
Chem Date	L	NO2/3	L	SO4	L	SRP	L	TP	L	TN	L	NH3-N			Missing data = -9999.0
		µg/L		mg/L		µg/L		µg/L		µg/L		µg/L
1981-05-01		175		0.81		2.2		37.65		480		-9999
1981-05-21		105		0.675		3.9		17.25		273		-9999
1981-05-22		150		1.575	<	1.45		10.7		527.5		-9999
1981-06-01		320		0.945	<	3.45		20.9		673		-9999
1981-06-29		99		0.885		20.9		56.5		560.5		-9999
1981-08-01		220		1.065		32.95		206		794.75		-9999
1981-09-01		295		1.5		137.5		216.5		1029		-9999
1981-10-01		330		1.815		189.5		340		1774.5		-9999
1981-11-02		223.5		1.2		85.1		155.2		1494		-9999
1981-11-30		95		0.375		9.65		29.75		336		-9999
1981-12-17		90		0.3	<	1		4.2		165		-9999
1982-01-01		85.5		0.36		5.65		9.03		399		-9999
1982-01-25		137		0.33		3.5		9.03		276		-9999
1982-03-01		165		0.63		2.5		23.3		475		-9999
1982-04-01		175		0.84	<	1.05		17.15		510.071		-9999
1982-05-03		80		0.345		13.9		22.15		480		-9999
1982-06-01		200		1.065		135.65		253.5		673		-9999
1982-07-01		247.5		1.365		39.15		184		560.5		-9999
1982-07-23		50.5		0.375		39.15		23.2		420.5		-9999
1984-09-28		141.037		0.783		3.855		12.201		412.311		-9999
1984-11-13		142.308		0.633	<	1		30.049		473.952		32.28
1984-12-12		127.344		0.291		2.44		4.79		253.882		119.636
1985-01-06		179.85		0.555		4.6		9.03		377.699		104.941
1985-02-10		241.564		0.251		6.592		8.177		389.549		173.988
1985-03-19		162.23		0.680333		1.51667		33.519		620.635		7.074
1985-04-01		134.59		0.6705		1.025		7.745		510.071		84.415
1985-04-24		99.17		0.5835		4.389		75.47		713.228		177.721
1985-05-30		94.278		0.303		5.121		44.319		451.39		50.431
1985-07-01		48.726		0.253		15.193		41.217		518.787		64.557
1985-08-04		348.077		1.328		234.338		324		1675.58		6.343
1985-08-26		216.067		0.844		27.751		55.02		929.213		226.802
1985-09-10		118.168		0.439		37.976		58.842		279.918		139.8
1985-10-07		89.321		0.386		3.552		10.757		269.205		52.804
1985-11-04		128.751		0.531		2.043		12.27		790.205		165.276
1985-12-04		219.605		0.681		1.771		9.117		406.653		73.724
1986-01-06		190.11		0.432		2.065		11.481		265.529		19.813
1986-01-28		56.106		0.265	<	1		2.864		126.609		37.216
1986-02-04		72.326		0.25	<	1		1.914		160.558		39.214
1986-02-15		88.389		0.173	<	1		3.924		136.726		14.149
1986-03-04		54.978		0.213	<	1		3.417		124.832		7.074
1986-03-17		146.69		0.571	<	1		18.125		223.421		48.691
1986-04-01		94.18		0.501	<	1		8.021		322.009		84.415
1986-04-15		413.607		2.082	<	1		49.72		1256.12		131.068
1986-04-29		118.34		0.822		3.134		11.305		413.962		177.721
1986-05-05		78.379		0.313	<	1		9.041		219.534		75.859
1986-05-19		343.052		1.447		42.804		97.666		964.188		70.176
1986-06-04		144.357		0.693		86.844		165.866		2472.12		1377.18
1986-06-13		92.423		0.352		1.549		26.048		291.4		691.091
1986-07-01		10.2		0.682		1		96.488		893.531	<	5
1986-07-29		234.491		0.789		18.235		37.487		576.468		107.689
1986-09-03		10.2		0.466	<	1		97.938		970.654	<	5
1986-09-10		76.141		0.316		4.495		10.935		432.073		96.761
1986-10-07		117.485		0.34	<	1		11.363		357.627		124.3
1986-11-04		242.173		0.743		16.571		47.399		899.154		309.989
1986-11-11		153.802		0.362		16.571		10.646		347.489		85.327
1986-11-18		197.639		0.56		16.571		7.312		347.941		103.766
1986-12-10		201.736		0.278		3.064		5.909		131.6		102.055
1987-01-15		205.832		0.497		1.45775		8.908		424.581		99.2551
1987-01-28		248.474		0.583		1.45775		12.886		480.671		98.244
1987-02-18		219.973		0.615		1.88475		8.883		559.044		236.76
1987-03-03		203.286		0.479		1.59825		6.374		549.76		154.091
1987-03-09		42.472		0.131		1.59825		5.273		133.745		71.423
1987-03-23		123.189		0.339		1.59825		11.9205		248.978		122.633
1987-04-11		223.181		0.724		2.498		18.568		569.41		200.155
1987-04-21		188.356		0.603		12.712		31.733		503.537		171.675
1987-05-05		301.75		1.069		2.611		273.695		2274.66		258.353
1987-05-19		234.275		0.828		13.061		33.05		1899.35		226.428
1987-05-30		277.852		1.231		23.511		71.886		1039.23		464.701
1987-06-09		64.274		0.343		86.737		119.677		1242.76		671.138
1987-06-17		293.069		1.004		16.759		67.646		956.535		301.496
1987-06-28		196.131		0.495		1.581		32.089		357.642		131.384
1987-07-20		55.9		0.69575		4.962		361.99		141.894		39.679
1987-07-22		24.791		0.714		40.9204		361.99		44.861		743.84
1987-08-12		194.013		0.905625		418.483		691.906		1353.32		1448
1987-08-15		76.248		0.933		472.421		691.906		2661.77		3860.84
1987-08-24		164.844		0.567		1.587		8.207		1802.51		1171.38
1987-09-24		321.441		1.158		16.337		189.506		943.26		16.215
1987-10-30		91.127		0.645		19.006		73.464		334.48		36.088
1987-11-16		826.417		1.051		18.091		66.789		754.233		570.821
1987-11-24		174.443		0.681		5.977		10.869		242.781		250.012
1987-12-03		128.369		0.311		7.721		13.14		303.878		251.298
1987-12-07		82.294		0.208		2.604		4.048		84.602		114.112
1987-12-10		80.843		0.158		3.051		4.17		102.803		157.423
1987-12-17		306.872		0.278		4.701		6.596		236.679		181.117
1987-12-30		448.703		0.683		3.708		6.938		470.44		265.693
1988-01-11		272.771		0.356		1.279		4.41		264.565		102.988
1988-01-15		74.663		0.159		1.487		2.358		141.724		101.203
1988-02-05		267.58		0.517		3.123		27.73		482.392		111.459
1988-02-09		163.01		0.344		2.416		6.011		315.792		147.509
1988-03-04		335.547		0.893		3.43		11.101		668.449		340.629
1988-03-07		102.722		0.176		1.988		9.943		264.173		124.897
1988-03-15		198.184		0.363		3.068		8.991		248.41		169.274
1988-03-30		243.367		0.307	<	0.3		10.595		237.95		118.857
1988-04-04		258.428		0.45		1.813		16.256		321.625		219.633
1988-04-07		267.464		0.188		3.01		11.302		201.342		129.991
1988-04-25		321.684		0.73		3.848		41.722		753.213		353.405
1988-04-29		214.23		0.546		4.938		3.837		564.695		232.952
1988-05-02		98.864		0.198		1.166		3.609		424.107		210.18
1988-05-05		112.233		0.579		3.895		25.493		392.174		208.075
1988-05-10		245.726		0.816		0.445		15.276		515.288		228.317
1988-05-17		237.027		0.598		0.941		74.217		770.106		164.299
1988-05-25		721.644		2.006		11.401		265.605		2720.88		437.683
1988-05-31		125.813		0.392		2.146		84.171		656.682		119.92
1988-06-02		101.046		0.302		0.963		7.978		221.223		159.445
1988-06-09		190.511		0.709		34.892		111.456		974.453		201.505
1988-06-17		495.099		0.97		35.662		263.849		1471.9		462.234
1988-06-24		419.588		0.99		12.392		105.282		1442.29		377.341
1988-06-28		364.239		1.062		2.501		55.284		1080.69		368.976
1988-07-01		159.633		0.442		1.681		18.746		427.969		432.263
1988-07-07		177.614		0.325		66.52		103.075		628.452		266.328
1988-07-14		50.456		0.165		9.933		17.841		186.041		64.221
1988-08-08		624.309		3.113		733.817		1022.21		4912.7		1270.84
1988-08-22		445.305		3.852		1193.69		1345.61		2557.34		2768.94
1988-09-12		342.688		1.804		146.098		184.756		509.504		854.064
1988-09-18		140.197		0.602		20.28		54.949		660.53		274.697
1988-09-21		69.026		0.157		2.835		11.14		334.188		80.452
1988-09-27		144.357		0.347		12.316		15.053		452.191		215.395
1988-09-28		86.985		0.227		7.492		15.917		312.844		146.824
1988-10-17		142.277		0.418		42.97		34.557		1238.55		1025.24
1988-11-03		176.046		0.483		13.372		30.599		606.983		290.08
1988-11-07		89.777		0.195		6.056		12.235		364.566		219.237
1988-11-14		142.017		0.218		6.272		6.953		304.098		33.313
1988-11-23		139.232		0.213		3.057		6.058		359.483		217.042
1988-12-07		126.807		0.226		2.24		5.999		238.663		142.986
1988-12-13		75.102		0.132	<	0.3		4.07		150.826		61.423
1988-12-30		223.353		0.304		0.889		9.205		479.718		206.447
1989-01-06		212.435		0.675		1.85		6.476		397.798		227.739
1989-01-10		178.284		0.297		1.722		6.744		260.118		95.833
1989-02-15		268.407		0.603		1.69		10.625		527.416		230.381
1989-02-20		215.318		0.274		2.33		7.702		281.718		63.193
1989-03-03		201.155		0.387		0.793		4.991		216.746		162.149
1989-03-10		168.275		0.316	<	0.3		10.019		273.844		89.667
1989-03-20		74.506		0.347		1.177		7.736		323.697		160.459
1989-04-03		180.197		0.43		1.168		7.431		539.381		338.623
1989-04-07		111.658		0.461		4.467		4.728		291.648		218.63
1989-04-27		191.503		0.611		213.138		2096.83		1255.75		1409.8
1989-05-02		196.502		0.761		36.949		50.014		2219.86		870.047
1989-05-04		182.531		1.192		56.414		62.254		1720.05		433.302
1989-05-08		162.207		1.145		293.744		223.285		2407.79		597.274
1989-05-18		138.701		0.925		206.603		1842.76		2253.79		449.97
1989-05-25		178.721		0.653		23.388		41.427		1618.65		502.628
1989-05-30		111.803		0.455		12.07		22.03		611.381		159.348
1989-06-12		314.98		1.748		2.339		72.235		1652.61		1253.72
1989-06-22		186.956		0.838		196.45		251.555		2981.58		1115.97
1989-07-05		242.022		0.821		10.53		151.149		1575.4		653.573
1989-07-14		134.194		0.527		134.763		187.127		1066.69		283.551
1989-07-26		344.301		1.2		120.126		280.588		1319.28		812.844
1989-08-15		202.247		0.78		68.16		252.617		1804.53		815.32
1989-08-22		168.394		0.561		9.41		40.966		749.76		253.858
1989-08-29		64.153		0.169		0.536		6.923		135.979		72.408
1989-09-05		125.335		0.412		22.349		48.071		329.772		164.275
1989-09-18		142.956		0.582		47.25		66.544		363.711		209.567
1989-10-02		196.166		0.948		255.384		82.076		506.12		363.663
1989-10-13		193.539		0.74		19.567		41.619		490.48		145.471
1989-10-23		47.992		0.596		0.913		8.512		343.112		141.341
1989-10-25		110.108		0.246		19.287		37.721		333.917		194.555
1989-11-06		140.63		0.281		0.436		4.266		288.993		58.224
1989-11-13		39.871		0.095	<	0.3		0.963		130.568		13.827
1989-11-28		378.727		0.506		0.397		10.004		413.259		21.004
1989-12-12		177.402		0.401		18.167		28.53		388.719		66.337
1989-12-20		297.071		0.856		7.578		22.306		437.299		150.548
1989-12-27		308.564		0.889		2.352		8.183		364.002		29.003
1990-01-11		143.881		0.234	<	0.3		14.316		313.633		97.34
1990-02-07		381.067		0.831		5.019		35.354		783.85		443.236
1990-02-19		178.597		0.28		9.663		16.437		430.455		260.119
1990-03-15		185.268		0.576		87.044		96.589		638.331		480.903
1990-03-21		326.855		0.648		62.807		78.934		1065.49		586.535
1990-04-16		282.073		0.922		20.059		48.944		762.567		437.653
1990-04-26		278.083		0.644		0.843		161.254		1542.13		512.616
1990-05-03		131.386		0.314		2.589		40.785		489.48		293.59
1990-05-15		202.881		0.936		4.978		41.466		797.518		346.301
1990-05-23		166.423		1.235		281.533		648.693		1607.66		644.178
1990-05-25		119.568		0.285		3.254		5.345		265.358		91.886
1990-05-30		104.624		0.279		0.954		10.75		364.456		417.635
1990-06-01		72.753		0.149		1.624		6.363		173.009		60.631
1990-06-05		147		0.315	<	0.3		7.438		513.533		217.849
1990-06-08		51.183		0.204		1.375		12.014		569.539		148.335
1990-06-13		204.523		0.559		157.226		80.366		1666.99		404.462
1990-06-29		308		0.849		11.433		124.632		1556.03		484.38
1990-07-03		136		0.352		13.982		48.053		415		242.274
1990-07-25		209.081		0.755		8.066		75.671		817.577		292.97
1990-07-27		125.253		0.207		0.759		7.697		333.582		74.151
1990-08-16		233.98		0.598		61.1585		81.5465		856.139		451.37
1990-08-20		342.709		0.989		121.558		155.396		1378.7		828.588
1990-08-21		196.906		0.519		15.689		26.229		556.557		494.027
1990-08-23		174.931		0.263		3.269		25.712		1514.84		1086.24
1990-08-28		104.614		0.244		2.599		9.831		312.008		164.805
1990-10-08		970.486		4.151		103.153		137.605		2312.16		798.46
1990-10-16		163.987		0.488		24.072		55.142		626.479		263.33
1990-10-22		49.088		0.068		3.101		17.995		158.649		75.669
1990-11-01		113.788		0.356		23.101		35.253		344.513		184.2
1990-11-07		185.761		0.512		17.841		34.893		425.538		208.811
1990-11-21		159.38		0.345		7.318		18.046		373.56		190.848
1990-12-11		72.562		0.192		5.932		11.702		196.036		70.964
1990-12-24		231.993		0.368		7.894		12.119		378.822		151.928
1990-12-31		129.742		0.253		7.023		9.687		194.866		53.195
1991-01-08		323.69		0.463		3.925		5.85		379.736		75.214
1991-01-16		167.041		0.268		1.718		2.849		342.322		196.161
1991-01-29		456.999		0.662		4.87		8.026		704.554		274.534
1991-02-19		304.666		0.428		0.328		9.387		609.507		206.158
1991-02-22		79.996		0.085		1.181		9.852		249.645		130.676
1991-03-04		99.596		0.198		1.453		9.78		224.459		114.441
1991-03-08		78.893		0.084		1.351		7.161		163.439		79.447
1991-03-25		582.656		1.067		1.01		11.881		1193.5		578.381
1991-04-03		555.186		2.35		12.074		37.6		1556.96		1010.72
1991-04-12		182.775		0.799		7.13		36.028		540.337		292.129
1991-04-26		220.386		0.884		1.999		40.429		761.893		399.495
1991-05-09		114.819		0.42		0.771		23.702		367.668		227.026
1991-05-13		155.399		0.434		5.828		14.107		290.995		117.087
1991-05-20		173.134		0.929		209.81		253.249		2227.45		1011.18
1991-05-28		142.563		0.517		2.777		74.117		625.787		179.446
1991-05-31		82.25		0.408		3.814		11.506		303.911		198.002
1991-06-07		139.525		0.428		2.7		43.466		481.23		142.285
1991-06-13		206.608		0.563	<	0.3		63.792		677.167		256.846
1991-06-18		120.252		0.331		5.504		27.018		406.716		227.497
1991-06-21		206.475		0.424		9.071		28.615		492.829		240.349
1991-06-24		113.338		0.328		3.325		18.693		300.176		131.138
1991-06-26		93.016		0.207		1.5		12.862		255.73		105.2
1991-07-01		166.728		0.443		0.4		17.542		452.32		249.666
1991-08-02		233.216		1.62		635.359		792.211		7655.56		65.775
1991-08-26		263.15		1.09		325.256		426.239		3935.69		178.161
1991-09-09		204.719		0.822		144.362		212.756		1765.77		243.72
1991-09-17		146.289		0.554		40.994		90.765		525.82		281.182
1991-10-25		361.312		1.068		50.664		141.394		1064.86		426.835
1991-11-05		115.738		0.425		9.352		33.98		313.66		170.527
1991-11-11		161.803		0.3	<	0.3		6.79		261.322		63.857
1991-11-21		151.538		0.405		0.501		9.585		387.786		254.494
1991-11-26		131.423		0.306		6.634		11.432		322.948		198.253
1991-12-09		170.44		0.716		1.942		10.323		416.867		228.27
1991-12-16		54.503		0.294		0.577		5.246		159.55		81.666
1992-01-15		413.365		1.249		3.687		16.127		908.727		413.189
1992-01-21		144.122		0.243		0.993		18.604		521.371		157.178
1992-01-27		72.182		0.125		1.029		6.505		157.948		69.394
1992-02-03		60.212		0.183		16.148		29.245		232.371		63.165
1992-02-17		399.354		0.899		2.928		13.169		919.802		458.51
1992-02-25		179.676		0.434	<	0.3		14.278		455.969		208.298
1992-03-17		235.495		0.583		1.062		7.716		545.302		335.808
1992-03-20		128.186		0.401		0.399		3.653		276.569		131.924
1992-04-13		221.378		0.644		15.503		37.182		559.618		272.461
1992-04-20		97.859		0.518		126.761		175.744		2126.5		455.31
1992-04-22		90.866		0.366		9.511		32.388		492.509		181.033
1992-05-01		314.44		1.082		0.991		112.751		1342.55		569.54
1992-05-11		446.274		2.514		353.685		892.183		3631.1		1139.08
1992-05-21		177.506		0.476		10.71		75.599		689.98		407.536
1992-05-28		123.963		0.36		2.549		65.994		631.769		165.583
1992-05-29		152.421		0.473		5.968		23.501		452.506		269.905
1992-06-01		105.418		0.398		3.695		26.657		378.914		164.478
1992-06-12		358.768		1.124		39.135		105.407		1193.37		540.936
1992-06-15		77.525		0.234		2.627		7.565		172.428		108.242
1992-06-26		203.655		0.887		34.368		69.137		820.912		385.799
1992-06-29		270.761		1.088		50.925		101.386		1036.3		567.456
1992-07-02		80.951		0.372		5.448		15.825		304.755		113.133
1992-07-08		208.186		0.611		2.733		25.611		810.878		416.055
1992-07-10		147.571		0.476		9.66		21.629		427.406		277.88
1992-07-14		51.733		0.141		2.026		11.263		184.652		102.879
1992-07-24		65.6895		0.389		3.74241		60.282		221.941		301.503
1992-08-18		79.646		0.389		8.03342		60.282		315.164		301.503
1992-08-24		185.377		0.638		9.06327		109.301		337.538		500.127
1992-09-09		284.129		1.135		11.8095		67.195		397.201		570.642
1992-09-16		102.234		0.401		13.011		25.089		423.303		129.516
1992-09-27		120.977		0.437		19.431		63.006		522.923		129.516
1992-10-13		292.44		0.92		18.02		70.484		799.937		-9999
1992-10-30		98.04		0.782		0.497		13.35		559.576		-9999
1992-11-05		77.977		0.377		1.868		13.623		319.215		-9999
1992-11-10		57.155		0.363		1.239		13.441		300.852		-9999
1992-12-14		156.703		0.452		0.407		4.302		345.694		-9999
1992-12-21		213.081		0.351		0.444		3.858		349.155		-9999
1993-01-05		173.355		0.53		0.37		4.81		289.398		-9999
1993-01-29		283.712		0.917		0.4		5.919		474.571		-9999
1993-03-11		405.435		0.767		36.883		55.994		695.332		-9999
1993-04-12		166.244		0.695		0.546		13.661		438.698		271.94
1993-04-20		154.157		0.623		8.366		14.354		567.578		289.739
1993-05-04		149.811		0.665		0.404		48.94		609.524		373.29
1993-05-19		270.367		1.147		53.576		146.891		1169.84		457.75
1993-05-26		160.672		1.013		293.214		531.411		4042.13		1179.57
1993-06-01		163.574		0.602		0.404		41.472		562.061		184.994
1993-06-14		151.086		0.746		0.338		16.841		422.721		217.603
1993-06-23		145.957		0.614		0.301		28.494		436.659		147.018
1993-07-02		137.552		2.607		29.992		69.942		513.819		203.891
1993-07-06		53.76		0.222		1.623		9.262		175.847		97.356
1993-07-12		175.926		0.608		2.87		14.106		440.843		252.358
1993-07-23		122.089		0.416		1.839		15.314		424.894		240.601
1993-07-27		81.278		0.671		242.844		314.534		5074.6		1969.09
1993-08-25		250.359		0.596		1.444		16.324		772.591		298.165
1993-09-13		166.878		0.593		42.882		74.166		667.681		397.838
1993-09-23		234.798		0.785		5.392		38.497		1599.16		534.538
1993-11-09		270.835		0.764		4.878		18.452		1965.91		1202.47
1993-11-23		222.149		0.401		4.456		14.23		570.488		328.611
1993-12-09		309.798		0.38		0.541		7.278		460.17		146.774
1994-01-04		213.547		0.183		1.142		4.62		307.909		98.012
1994-01-25		202.612		0.392		0.337		5.225		413.45		206.537
1994-02-28		292.233		0.383		1.948		3.538		420.988		231.056
1994-04-04		223.112		0.725		79.176		86.905		721.709		686.699
1994-04-14		291.925		0.764		1.279		6.333		649.223		597.761
1994-05-02		465.623		1.153		0.832		39.053		1122.83		603.906
1994-05-12		169.534		0.488		34.8		56.302		667.958		157.971
1994-05-19		226.122		0.941		0.548		31.05		699.603		578.588
1994-05-23		130.158		0.324		1.892		7.008		356.759		186.421
1994-06-01		324.523		0.629		0.782		29.215		577.334		151.799
1994-06-06		90.85		0.266	<	0.3		9.997		239.197		84.25
1994-06-20		130.442		0.396	<	0.3		15.098		358.084		164.451
1994-07-08		165.519		0.471		1.071		20.528		370.015		61
1994-08-15		1164.89		2.48		117.625		218.086		2539.37		997.463
1994-08-30		829.147		2.231		105.89		182.27		3338.77		1734.32
1994-09-06		214.916		0.707		222.291		30.959		653.553		630.191
1994-10-03		267.188		0.838		23.873		52.558		727.917		640.742
1994-10-13		140.702		0.322		7.947		15.056		358.507		241.499
1994-10-18		320.65		0.662		5.41		9.488		659.398		700.784
1994-10-28		68.814		0.123		1.643		4.033		126.022		66.442
1994-11-04		58.885		0.073		1.46		3.417		98.075		55.292
1994-11-21		287.548		0.422		0.431		5.302		489.121		204.489
1994-12-07		151.078		0.19	<	0.3		3.304		244.935		88.366
1994-12-21		298.799		0.315	<	0.3		2.522		437.308		193.91
1994-12-30		234.752		0.305	<	0.3		2.148		359.556		163.753
1995-01-13		236.144		0.169	<	0.3		3.338		322.419		88.257
1995-01-27		120.538		0.15	<	0.3		2.056		207.145		78.28
1995-02-17		114.127		0.22		0.835		2.464		223.943		122.694
1995-02-22		66.337		0.103	<	0.3		2.851		138.829		53.682
1995-03-13		326.896		0.554		15.855		32.007		632.378		610.056
1995-03-21		91.668		0.171		3.581		6.124		289.344		218.359
1995-04-03		75.162		0.144		1.599		5.199		171.788		90.565
1995-04-11		100.221		0.253		4.077		7.426		236.735		150.914
1995-04-21		166.449		0.268		2.378		7.357		367.33		443.624
1995-05-04		335.806		0.732		0.537		25.359		873.518		677.531
1995-05-17		118.026		0.231	<	0.3		13.387		280.504		32.025
1995-06-02		452.379		0.989		0.614		84.289		1544.15		663.241
1995-06-07		76.33		0.081		3.494		8.29		137.396		38.77
1995-06-12		101.448		0.348		9.067		76.658		575.98		124.21
1995-06-16		514.617		1.143		41.437		241.431		1990.68		638.311
1995-06-23		168.298		0.36		9.868		15.944		406.516		360.879
1995-07-05		166.94		0.491		0.767		42.434		520.241		325.852
1995-07-13		114.508		0.392	<	0.3		11.095		297.645		362.01
1995-07-26		289.555		1.137		0.585		25.916		704.521		740.508
1995-08-09		273.264		0.637		0.412		30.755		489.48		78.473
1995-08-17		236.647		1.144		3.275		17.335		517.226		431.15
1995-09-12		213.976		0.671		0.581		13.788		413.348		12.255
1995-10-02		189.848		0.639		19.503		45.609		613.641		437.93
1995-10-17		91.951		0.23		0.333		8.115		227.07		69.396
1995-10-26		100.015		0.236		1.873		4.889		222.331		99.13
1995-11-14		169.58		0.312		2.093		6.525		325.991		121.326
1995-11-27		149.844		0.383		0.516		4.545		364.54		167.644
1995-11-29		63.625	<	0.05		0.774		1.517		130.601		38.391
1995-12-12		76.189		0.12		0.847		5.881		174.799		63.797
1996-01-05		79.022		0.09		0.737		4.11		139.625		47.418
1996-01-12		78.752		0.158		1.104		1.884		128.333		38.619
1996-02-08		354.175		0.381		1.958		4.943		544.834		160.718
1996-02-20		192.716		0.368		3.281		6.743		417.974		214.798
1996-03-05		144.608		0.406	<	0.3		4.037		275.345		138.281
1996-04-02		306.014		0.665		1.684		7.202		611.144		349.986
1996-04-12		132.361		0.329		1.977		4.738		325.607		177.346
1996-05-01		271.748		0.561		0.39		9.127		598.071		536.121
1996-05-17		158.776		0.391		2.966		13.532		475.05		499.701
1996-05-30		112.374		0.502	<	0.3		6.905		373.614		184.849
1996-07-01		205.387		0.703		0.39		25.641		602.384		84.292
1996-08-07		140.48		0.441		0.317		16.999		408.289		36.858
1996-09-10		297.871		0.856		0.536		17.604		688.767		209.374
1996-09-17		250.251		0.365		9.077		21.751		534.69		535.019
1996-10-17		283.783		0.856		2.606		21.965		629.464		223.449
1996-11-15		153.457		0.296	<	0.3		6.057		294.311		129.694
1996-11-20		47.34		0.061		1.15		3.445		91.082		16.361
1996-11-26		158.434		0.23		0.972		2.6705		222.246		65.434
1996-12-02		87.624		0.214		0.723		2.6705		163.754		74.024
1996-12-24		216.258		0.206		1.085		1.896		270.042		87.999
1997-01-16		102.109		0.129		0.792		2.089		124.464		32.596
1997-01-30		248.449		0.238		1.158		2.486		336.532		118.041
1997-02-21		317.007		0.17		1.377		2.164		473.913		295.104
1997-03-18		256.858		0.428		2.326		3.478		435.66		258.077
1997-04-07		329.697		0.733		42.419		57.011		1445.42		822.928
1997-04-21		213.964		0.587		3.862		7.581		459.213		619.332
1997-05-03		241.622		0.413		5.641		21.971		612.481		891.318
1997-05-13		121.133		0.698		0.798		21.867		519.864		734.866
1997-05-26		72.211		0.081		1.993		32.363		240.689		9.928
1997-06-02		128.642		0.223		2.429		35.231		407.4		228.817
1997-06-26		109.72		0.294		1.407		17.429		302.588		93.904
1997-07-07		53.837		0.082	<	0.3		6.001		122.591		38.626
1997-07-17		170.202		0.344		2.483		18.194		405.406		110.681
1997-08-01		366.784		0.73	<	0.3		24.592		810.744		167.446
1997-08-21		311.87		0.768		0.317		33.689		706.759		280.246
1997-09-08		271.594		0.57		4.139		27.24		656.981		249.399
1997-09-17		116.129		0.281	<	0.3		9.001		232.075		97.634
1997-10-17		191.488		0.564		1.834		18.525		385.7		116.48
1997-11-10		205.179		0.314		2.315		13.907		351.09		93.848
1997-12-15		170.085		0.187		6.031		13.451		315.911		107.365
1998-01-16		584.357		0.476		3.053		13.095		961.85		528.19
1998-01-28		147.284		0.117		0.573		2.311		241.43		86.159
1998-02-18		472.801		0.329		3.754		24.761		932.156		505.338
1998-03-04		201.073		-9999		0.647		4.032		299.21		-9999
1998-03-19		240.729		-9999		0.387		4.742		452.757		-9999
1998-03-30		146.819		-9999		1.811		5.895		471.077		-9999
1998-04-20		298.851		-9999		0.737		7.118		647.461		-9999
1998-04-24		163.538		-9999		5.602		19.869		468.763		-9999
1998-05-14		164.502		-9999		4.872		21.098		386.626		-9999
1998-05-20		53.027		-9999		0.514		5.717		105.524		-9999
1998-05-26		200.345		-9999	<	0.3		9.477		446.014		-9999
1998-06-03		83.561		-9999	<	0.3		8.831		353.975		-9999
1998-06-11		38.328		-9999	<	0.3		33.666		662.044		-9999
1998-06-18		89.14		-9999	<	0.3		9.224		179.797		-9999
1998-06-23		199.62		-9999	<	0.3		14.787		464.121		-9999
1998-06-29		203.965		-9999		1.329		16.701		480.749		-9999
1998-07-07		75.844		-9999		0.767		9.971		184.051		-9999
1998-07-29		109.87		-9999		2.81		17.667		259.201		-9999
1998-08-03		268.784		-9999		0.767		23.324		741.868		-9999
1998-08-28		766.692		-9999		0.829		58.644		2340.48		1098.59
1998-09-09		582.845		-9999		81.688		151.385		1988.44		846.435
1998-09-21		162.31		-9999	<	0.3		16.031		344.37		197.462
1998-09-28		163.395		-9999		1.961		7.779		261.037		120.644
1998-10-06		108.858		0.381		0.829		7.763		226.42		159.986
1998-10-12		175.09		0.447		6.772		13.068		348.517		228.512
1998-11-19		346.02		0.899		0.958		11.054		397.267		302.968
1998-12-02		99.711		0.19		0.805		3.537		163.848		90.769
1998-12-16		318.742		0.483		0.613		4.327		546.126		403.703
1998-12-28		255.586		0.103		2.142		3.347		267.914		132.498
1999-01-08		180.797		0.288		1.76		4.834		250.95		148.467
1999-01-11		128.747		0.22		0.881		4.131		213.196		102.466
1999-01-22		299.99		0.16		0.307		2.082		472.302		186.187
1999-02-10		377.689		0.401		3.63		8.475		696.556		262.077
1999-02-21		387.607		0.25		1.627		4.915		673.86		225.036
1999-03-01		73.544		0.133		0.53		2.145		185.249		85.039
1999-03-16		228.81		0.298		1.883		4.874		540.512		304.683
1999-04-05		368.809		4.68		1560.07		1979.29		9622.09		3720.36
1999-04-27		557.84		1.287		1.596		36.374		1297.04		744.196
1999-05-10		138.699		1.555		411.279		477.369		4869.08		3877.68
1999-05-13		269.719		0.611		7.8		12.423		701.872		1901.83
1999-05-19		379.672		4.82		1544.72		1661.6		7002.53		3819.44
1999-06-01		140.126		0.349		17.7		28.764		580.104		423.479
1999-06-11		410.138		0.858		84.922		270.795		7443.47		5077.37
1999-06-28		292.397		0.276		1.203		25.265		4752.94		429.324
1999-07-06		291.041		0.428		0.511		28.876		4039.72		2822.14
1999-08-12		220.599		0.412		0.875		42.335		3890.99		3443.03
1999-09-04		386.649		0.735		5.39		39.511		2378.56		806.038
1999-09-27		431.444		1.101		68.472		121.881		1437.3		246.431
1999-10-12		133.921		0.278		11.464		15.054		270.83		79.031
1999-10-29		74.729		0.165		1.669		7.337		192.97		312.739
1999-11-08		199.912		0.261		6.309		8.911		452.657		240.726
1999-11-18		216.056		0.333		12.029		16.053		447.584		198.111
1999-11-29		87.536		0.123		2.129		3.421		204.394		120.105
1999-12-19		65.467		0.1		1.322		2.046		155.725		109.725
2000-01-03		305.432		0.423		2.167		4.331		764.756		324.382
2000-01-10		91.051		0.273		3.353		12.463		411.791		219.667
2000-01-15		166.37		0.231		2.014		4.496		391.447		181.017
2000-01-28		244.79		0.207		2.205		4.516		462.439		167.259
2000-02-15		244.53		0.249		1.764		3.214		470.406		197.443
2000-02-25		193.346		0.218		1.002		2.088		320.07		113.794
2000-02-29		99.369		0.106		0.921		2.007		247.307		78.648
2000-03-15		239.468		0.411		11.627		16.087		619.817		272.206
2000-03-23		205.526		0.392		3.863		12.236		518.342		242.513
2000-03-30		191.559		0.378		3.657		10.479		398.224		174.47
2000-04-17		187.584		0.555		1.764		9.773		480.716		243.06
2000-04-29		477.837		1.605		7.166		34.473		1133.19		820.467
2000-05-05		182.945		0.492		11.066		32.399		562.458		188.942
2000-05-10		268.911		0.754		7.819		31.786		936.608		452.632
2000-05-20		364.981		0.763		2.239		40.72		859.153		264.439
2000-06-01		179.299		0.413		14.039		34.119		786.673		184.149
2000-06-13		185.58		0.315		1.64		27.386		656.397		243.66
2000-06-16		123.09		0.26		4.46		17.626		454.263		234.27
2000-06-22		292.085		0.648		1.275		39.82		903.01		441.35
2000-07-05		279.08		0.607		8.06		44.77		841.528		314.62
2000-07-07		215.32		0.235		7.17		18.49		662.838		310.21
2000-08-11		1104.27		2.577		136.411		218.44		4789.66		3783.18
2000-09-03		223.665		0.516		68.509		101.43		825.611		339.534
2000-09-11		287.272		0.633		10.981		19.374		593.405		825.49
2000-10-03		117.116		0.325		5.265		14.68		287.549		777.092
2000-10-16		541.635		1.772		49.447		84.404		1793.65		250.58
2000-10-23		120.404		0.281		4.199		6.764		293.43		164.215
2000-10-30		185.173		0.294		5.64		11.093		423.09		220.676
2000-11-06		241.528		0.284		18.276		25.562		596.79		271.251
2000-12-01		191.782		0.223		5.44		7.887		364.02		143.444
2000-12-15		369.957		0.33		3.112		6.246		590.53		183.82
2000-12-26		446.903		0.375		3.233		5.29		568.708		217.332
2001-01-20		562.172		0.758		7.545		5.987		750.642		379.773
2001-02-05		99.42		0.220476		1.41		3.149		150.329		141.196
2001-02-20		420.512		0.489		3.435		8.332		659.447		314.928
2001-02-26		297.439		0.359		1.451		3.484		521.281		313.825
2001-03-20		497.798		1.035		16.879		26.089		1334.86		1322.55
2001-03-27		189.958		0.323		4.3		8.891		463.555		337.805
2001-04-02		126.559		0.33		3.059		5.583		305.196		238.236
2001-04-04		127.905		0.362		2.045		4.164		237.276		222.888
2001-04-11		201.452		0.487618		24.622		27.522		358.102		45.288
2001-05-02		325.044		1.284		56.146		90.373		1356.91		1365.94
2001-05-17		347.921		1.301		18.767		48.604		1036.72		509.561
2001-06-05		202.578		0.787		1.351		27.924		561.151		340.322
2001-06-11		154.804		0.345		0.885		33.511		570.605		362.234
2001-06-13		30.567		0.089		0.491		17.602		64.246		51.146
2001-06-19		318.506		0.915		4.92		25.764		785.879		468.436
2001-06-28		289.51		0.687		0.885		51.502		652.652		179.522
2001-07-10		330.324		0.817	<	0.3		22.887		788.171		765.975
2001-07-23		497.76		1.108		33.162		136.411		1445.4		1460.12
2001-07-30		310.424		0.822		35.524		82.02		948.982		1059.09
2001-08-01		49.707		0.118		5.624		9.874		128.845		116.759
2001-10-15		466.051		1.701		153.783		308.231		3285.53		2618.69
2001-10-24		249.428		0.419889		16.807		36.973		699.798		446.334
2001-10-29		98.718		0.233		0.671		52.342		337.669		49.242
2001-10-31		146.592		0.325		7.01		10.026		375.589		662.173
2001-11-27		181.805		0.341		37.914		115.088		1216.59		1513.87
2001-12-12		311.6		0.571973		44.232		95.634		796.618		695.963
2002-01-07		408.135		0.257		4.89		7.209		606.684		771.688
2002-01-23		211.01		0.237		2.9		8.56		381.67		136.41
2002-01-28		306.968		0.267277		4.957		27.937		754.739		923.073
2002-03-04		601.36		0.775		10.48		23.666		1292.43		580.486
2002-03-12		235.04		0.272		13.61		18.376		291.453		183.887
2002-03-21		114.267		0.209596		1.307		4.693		187.806		92.7848
2002-05-06		310.189		0.654		11.29		33.895		790.172		1044.49
2002-05-23		292.818		0.789383		3.77		22.34		739.256		959.74
2002-06-13		119.22		0.414		2.9		14.06		289.365		648.12
2002-06-20		291.156		0.293		10.99		43.94		587.81		658.45
2002-08-02		283.8		0.581		14.9		34.81		773.904		687.49
2002-08-08		322.04		0.635		55.12		97.6		1159.72		858.81
2002-09-10		459.885		0.869		33.05		78.445		1354.17		892.08
2002-09-20		39.38		0.381		10.78		25.98		465.426		270.82
2002-10-01		348.725		0.704		17.85		31.07		862.06		586.459
2002-11-11		468.938		0.792		32.55		69.04		1295.19		549.21
2002-11-15		120.025		0.181		6.56		10.9		363.786		265.15
2002-12-16		437.768		0.874		12.63		29.82		1394.82		822.452
2002-12-30		200.246		0.251		4.29		7.5		496.945		240.013
2003-01-03		113.606		0.131		2.07		4.77		309.69		220.619
2003-01-07		183.182		0.175		3.07		4.89		371.78		223.176
2003-01-31		204.07		0.191		2.29		8.45		378.98		207.35
2003-02-06		117.84		0.092		0.55		2.5		217.42		92.02
2003-03-04		1013.38		0.828		18.18		44.1		1664.28		845.03
2003-03-10		146.905		0.5535		1.28		4.67		251.21		87.14
2003-03-20		70.535		0.279		3.4		7.402		236.245		143.83
2003-03-28		163.773		0.295		6.26		9.809		494.002		498.79
2003-04-03		109.231		0.192		5.21		8.425		330.771		262.39
2003-04-15		449.905		1.296		13.69		30.24		1044.05		787.325
2003-04-30		367.88		0.582		14.39		55.372		1028.22		655.36
2003-05-05		97.74		0.205		5.43		9.853		226.058		219.02
2003-05-19		176.712		0.445		5.58		17.685		455.208		362.39
2003-05-27		268.96		0.651		1.245		33.39		700.467		441.09
2003-06-01		318.35		0.591		11.94		34.22		907.515		433.53
2003-06-11		291.1		0.707		1.04		44.98		599.39		394.81
2003-06-23		211.49		0.65		1.47		29.82		361.219		289.53
2003-07-09		690.54		1.432		27.28		116.108		2031.55		2021.69
2003-08-24		419.4		0.845		19.1		69.44		2398.74		1553.28
2003-09-12		148.27		0.262		10.92		22.766		361.964		281.28
2003-09-22		299.28		0.437		47.35		60.333		858.212		479.7
2003-10-17		235.524		0.359		14.88		30.905		506.13		298.61
2003-11-02		104.59		0.167		8.664		18.385		262.851		166.97
2003-11-12		285.45		0.501		18.86		26.261		560.007		261.48
2003-11-24		437.86		0.34		13.122		26.112		741.385		306.85
2003-12-02		467.19		0.453		11.205		22.86		1016.34		507.77
2003-12-17		179.42		0.116		2.943		4.107		358.693		161.65
2004-01-05		298.96		0.208		4.49		7.802		442.332		53.427
2004-01-20		335.27		0.11		1.96		3.524		382.46		193.247
2004-01-29		79.46		0.103		1.24		2.264		175.712		95.673
2004-02-09		356.9		0.198		2.58		5.314		567.12		269.357
2004-02-19		225.673		0.144		2.28		3.903		458.627		248.34
2004-03-08		368.93		0.598		4.3		8.581		749.365		422.37
2004-03-29		349.51		0.74		9.91		31.522		854.798		466.29
2004-04-09		320.537		0.566		9.59		23.015		756.367		463.18
2004-04-16		238.172		1.036		10.741		25.864		752.926		469.6
2004-04-22		163.776		0.415		4.312		13.724		609.503		269.66
2004-05-10		535.149		1.38		22.95		122.121		1626.98		925.9
2004-05-14		489.022		1.289		14.39		39.488		1429.73		1093.15
2004-05-24		167.352		0.536		4.83		15.998		464.69		974.23
2004-06-01		122.331		0.343		1.66		9.341		379.13		230.47
2004-06-11		317.097		0.627		0.86		30.75		834.53		330.63
2004-06-14		301.147		0.723		20.72		29.008		834.53		436.38
2004-06-29		267.112		0.599		0.96		31.269		728.949		205.75
2004-07-06		341.917		0.54		17.92		35.894		958.68		462.73
2004-07-09		245.307		0.512		15.96		43.016		975.027		834.64
2004-07-21		301.295		0.566		88.93		313.242		1199.07		494.11
2004-08-09		96.242		0.189		4.99		10.656		245.244		907.76
2004-08-18		221.018		0.492		27.17		71.31		649.268		358.6
2004-08-24		69.657		0.166		1.29		9.822		179.975		104.28
2004-08-29		116.856		0.237		0.62		3.728		218.135		119.33
2004-09-03		230.906		0.406		21.68		96.068		553.833		393.68
2004-09-15		198.39		0.369		17.49		24.13		478.39		303.39
2004-09-20		172.29		0.528		7.33		10.396		449.18		345.03
2004-09-24		128.32		0.359		3.33		5.927		336.69		312.942
2004-10-11		320		0.496		23.58		175.757		980.622		499.63
2004-10-22		156.2		0.467		1.54		11.773		359.688		220.29
2004-11-15		544.9		0.821		3.85		19.633		1189.58		646.31
2004-12-13		119.3		0.364		1.56		4.997		235.102		151.17

## Sheet: Precip volume
DSET	COOPID	WBNID	STATION NAME	YEARMO	DAHR	UN	Val	Flag 1	Flag 2	Comments	Actual Value	Units		PRCP
3200	240755	99999	BIGFORK 12 S	197710	218	HI	0		1		0	Inch		Daily precipitation. Precipitation reading for 24 hours ending at
3200	240755	99999	BIGFORK 12 S	197710	318	HI	0		1		0	Inch		time of observation. Trace is less than 0.005 inch. Unit
3200	240755	99999	BIGFORK 12 S	197710	418	HI	0		1		0	Inch		Measurement, Inches to Hundredths.
3200	240755	99999	BIGFORK 12 S	197710	518	HI	0		1		0	Inch
3200	240755	99999	BIGFORK 12 S	197710	618	HI	0		1		0	Inch
3200	240755	99999	BIGFORK 12 S	197710	718	HI	99999	S	1		99999	Inch		Flag 1
3200	240755	99999	BIGFORK 12 S	197710	818	HI	80	A	1		0.8	Inch		T - Trace (data value = 00000 for a
3200	240755	99999	BIGFORK 12 S	197710	918	HI	37		1		0.37	Inch		trace).	see below
3200	240755	99999	BIGFORK 12 S	197710	1018	HI	0		1		0	Inch		S - Included in a subsequent value.
3200	240755	99999	BIGFORK 12 S	197710	1118	HI	0		1		0	Inch		(data value = "00000" OR
3200	240755	99999	BIGFORK 12 S	197710	1218	HI	0		1		0	Inch		"99999").
3200	240755	99999	BIGFORK 12 S	197710	1318	HI	2		1		0.02	Inch		M - Flag1 is "M" if the data value
3200	240755	99999	BIGFORK 12 S	197710	1418	HI	0		1		0	Inch		is missing. In this case, the
3200	240755	99999	BIGFORK 12 S	197710	1518	HI	0		1		0	Inch		sign of the meteorological value
3200	240755	99999	BIGFORK 12 S	197710	1618	HI	0		1		0	Inch		is assigned "-" and the value of
3200	240755	99999	BIGFORK 12 S	197710	1718	HI	0		1		0	Inch		the meteorological element is
3200	240755	99999	BIGFORK 12 S	197710	1818	HI	0		1		0	Inch		assigned "99999".
3200	240755	99999	BIGFORK 12 S	197710	1918	HI	0		1		0	Inch		E - Estimated (see Table "O" for
3200	240755	99999	BIGFORK 12 S	197710	2018	HI	0		1		0	Inch		estimating method).
3200	240755	99999	BIGFORK 12 S	197710	2118	HI	0		1		0	Inch		A - Accumulated amount since last
3200	240755	99999	BIGFORK 12 S	197710	2218	HI	0		1		0	Inch		measurement.
3200	240755	99999	BIGFORK 12 S	197710	2318	HI	0		1		0	Inch
3200	240755	99999	BIGFORK 12 S	197710	2418	HI	0		1		0	Inch
3200	240755	99999	BIGFORK 12 S	197710	2518	HI	0		1		0	Inch		Prior to September 1991, when no daily precipitation reading was taken
3200	240755	99999	BIGFORK 12 S	197710	2618	HI	11		1		0.11	Inch		but the amount from that day (if any) is included in a subsequent value,
3200	240755	99999	BIGFORK 12 S	197710	2718	HI	0		1		0	Inch		the data value of precipitation is set equal to "00000" and flagged with
3200	240755	99999	BIGFORK 12 S	197710	2818	HI	2		1		0.02	Inch		an "S" in flag position 1. In turn, the successive accumulated amount
3200	240755	99999	BIGFORK 12 S	197710	2918	HI	10		1		0.1	Inch		will be flagged with an "A" in flag position 1. Since September 1991,
3200	240755	99999	BIGFORK 12 S	197710	3018	HI	0		1		0	Inch		it has been a practice at NCDC to set the precipitation value to
3200	240755	99999	BIGFORK 12 S	197710	3118	HI	3		1		0.03	Inch		99999 in this situation; the flagging procedure has not changed.
3200	240755	99999	BIGFORK 12 S	197711	118	HI	1		1		0.01	Inch
3200	240755	99999	BIGFORK 12 S	197711	218	HI	3		1		0.03	Inch
3200	240755	99999	BIGFORK 12 S	197711	318	HI	0		1		0	Inch
3200	240755	99999	BIGFORK 12 S	197711	418	HI	0		1		0	Inch		Flag 2
3200	240755	99999	BIGFORK 12 S	197711	518	HI	0		1		0	Inch		0 - Valid data element.
3200	240755	99999	BIGFORK 12 S	197711	618	HI	6		1		0.06	Inch		1 - Valid data element (from "unknown"
3200	240755	99999	BIGFORK 12 S	197711	718	HI	4		1		0.04	Inch		source, pre-1982).
3200	240755	99999	BIGFORK 12 S	197711	818	HI	0		1		0	Inch		J - Subjectively derived value
3200	240755	99999	BIGFORK 12 S	197711	918	HI	0	T	1		0	Inch		R - Precipitation not reported; estimated
3200	240755	99999	BIGFORK 12 S	197711	1018	HI	0		1		0	Inch		as "O"
3200	240755	99999	BIGFORK 12 S	197711	1118	HI	0		1		0	Inch		S**- Manually edited value
3200	240755	99999	BIGFORK 12 S	197711	1218	HI	0		1		0	Inch		U - Failed areal consistency check
3200	240755	99999	BIGFORK 12 S	197711	1318	HI	0	T	1		0	Inch		(beginning Oct. 1992)
3200	240755	99999	BIGFORK 12 S	197711	1418	HI	0		1		0	Inch		** - Manually edited value could be derived
3200	240755	99999	BIGFORK 12 S	197711	1518	HI	9		1		0.09	Inch		by any of the procedures noted by
3200	240755	99999	BIGFORK 12 S	197711	1618	HI	0		1		0	Inch		Flags A-R.
3200	240755	99999	BIGFORK 12 S	197711	1718	HI	0	T	1		0	Inch
3200	240755	99999	BIGFORK 12 S	197711	1818	HI	46		1		0.46	Inch
3200	240755	99999	BIGFORK 12 S	197711	1918	HI	0		1		0	Inch		manually added data for November 1992, March 1997, and December 1998
3200	240755	99999	BIGFORK 12 S	197711	2018	HI	2		1		0.02	Inch
3200	240755	99999	BIGFORK 12 S	197711	2118	HI	2		1		0.02	Inch
3200	240755	99999	BIGFORK 12 S	197711	2218	HI	3		1		0.03	Inch
3200	240755	99999	BIGFORK 12 S	197711	2318	HI	26		1		0.26	Inch
3200	240755	99999	BIGFORK 12 S	197711	2418	HI	18		1		0.18	Inch
3200	240755	99999	BIGFORK 12 S	197711	2518	HI	49		1		0.49	Inch
3200	240755	99999	BIGFORK 12 S	197711	2618	HI	14		1		0.14	Inch
3200	240755	99999	BIGFORK 12 S	197711	2718	HI	7		1		0.07	Inch
3200	240755	99999	BIGFORK 12 S	197711	2818	HI	1		1		0.01	Inch
3200	240755	99999	BIGFORK 12 S	197711	2918	HI	1		1		0.01	Inch
3200	240755	99999	BIGFORK 12 S	197711	3018	HI	0		1		0	Inch
3200	240755	99999	BIGFORK 12 S	197712	118	HI	17		1		0.17	Inch
3200	240755	99999	BIGFORK 12 S	197712	218	HI	22		1		0.22	Inch
3200	240755	99999	BIGFORK 12 S	197712	318	HI	16		1		0.16	Inch
3200	240755	99999	BIGFORK 12 S	197712	418	HI	15		1		0.15	Inch
3200	240755	99999	BIGFORK 12 S	197712	518	HI	0		1		0	Inch
3200	240755	99999	BIGFORK 12 S	197712	618	HI	60		1		0.6	Inch
3200	240755	99999	BIGFORK 12 S	197712	718	HI	0		1		0	Inch
3200	240755	99999	BIGFORK 12 S	197712	818	HI	12		1		0.12	Inch
3200	240755	99999	BIGFORK 12 S	197712	918	HI	23		1		0.23	Inch
3200	240755	99999	BIGFORK 12 S	197712	1018	HI	29		1		0.29	Inch
3200	240755	99999	BIGFORK 12 S	197712	1118	HI	14		1		0.14	Inch
3200	240755	99999	BIGFORK 12 S	197712	1218	HI	2		1		0.02	Inch
3200	240755	99999	BIGFORK 12 S	197712	1318	HI	25		1		0.25	Inch
3200	240755	99999	BIGFORK 12 S	197712	1418	HI	49		1		0.49	Inch
3200	240755	99999	BIGFORK 12 S	197712	1518	HI	25		1		0.25	Inch
3200	240755	99999	BIGFORK 12 S	197712	1618	HI	1		1		0.01	Inch
3200	240755	99999	BIGFORK 12 S	197712	1718	HI	0		1		0	Inch
3200	240755	99999	BIGFORK 12 S	197712	1818	HI	43		1		0.43	Inch
3200	240755	99999	BIGFORK 12 S	197712	1918	HI	0	T	1		0	Inch
3200	240755	99999	BIGFORK 12 S	197712	2018	HI	0		1		0	Inch
3200	240755	99999	BIGFORK 12 S	197712	2118	HI	0		1		0	Inch
3200	240755	99999	BIGFORK 12 S	197712	2218	HI	51		1		0.51	Inch
3200	240755	99999	BIGFORK 12 S	197712	2318	HI	60		1		0.6	Inch
3200	240755	99999	BIGFORK 12 S	197712	2418	HI	0		1		0	Inch
3200	240755	99999	BIGFORK 12 S	197712	2518	HI	0		1		0	Inch
3200	240755	99999	BIGFORK 12 S	197712	2618	HI	99999	S	1		99999	Inch
3200	240755	99999	BIGFORK 12 S	197712	2799	HI	-99999	M			-99999	Inch
3200	240755	99999	BIGFORK 12 S	197712	2899	HI	-99999	M			-99999	Inch
3200	240755	99999	BIGFORK 12 S	197712	2999	HI	-99999	M			-99999	Inch
3200	240755	99999	BIGFORK 12 S	197712	3099	HI	-99999	M			-99999	Inch
3200	240755	99999	BIGFORK 12 S	197712	3118	HI	150	A	1		1.5	Inch
3200	240755	99999	BIGFORK 12 S	197801	118	HI	99999	S	1		99999	Inch
3200	240755	99999	BIGFORK 12 S	197801	299	HI	-99999	M			-99999	Inch
3200	240755	99999	BIGFORK 12 S	197801	318	HI	74	A	1		0.74	Inch
3200	240755	99999	BIGFORK 12 S	197801	418	HI	10		1		0.1	Inch
3200	240755	99999	BIGFORK 12 S	197801	518	HI	0	T	1		0	Inch
3200	240755	99999	BIGFORK 12 S	197801	618	HI	0		1		0	Inch
3200	240755	99999	BIGFORK 12 S	197801	718	HI	0		1		0	Inch
3200	240755	99999	BIGFORK 12 S	197801	818	HI	35		1		0.35	Inch
3200	240755	99999	BIGFORK 12 S	197801	918	HI	29		1		0.29	Inch
3200	240755	99999	BIGFORK 12 S	197801	1018	HI	0		1		0	Inch
3200	240755	99999	BIGFORK 12 S	197801	1118	HI	7		1		0.07	Inch
3200	240755	99999	BIGFORK 12 S	197801	1218	HI	11		1		0.11	Inch
3200	240755	99999	BIGFORK 12 S	197801	1318	HI	0		1		0	Inch
3200	240755	99999	BIGFORK 12 S	197801	1418	HI	52		1		0.52	Inch
3200	240755	99999	BIGFORK 12 S	197801	1518	HI	0		1		0	Inch
3200	240755	99999	BIGFORK 12 S	197801	1618	HI	5		1		0.05	Inch
3200	240755	99999	BIGFORK 12 S	197801	1718	HI	0		1		0	Inch
3200	240755	99999	BIGFORK 12 S	197801	1818	HI	11		1		0.11	Inch
3200	240755	99999	BIGFORK 12 S	197801	1918	HI	0		1		0	Inch
3200	240755	99999	BIGFORK 12 S	197801	2018	HI	0		1		0	Inch
3200	240755	99999	BIGFORK 12 S	197801	2118	HI	0		1		0	Inch
3200	240755	99999	BIGFORK 12 S	197801	2218	HI	0		1		0	Inch
3200	240755	99999	BIGFORK 12 S	197801	2318	HI	0		1		0	Inch
3200	240755	99999	BIGFORK 12 S	197801	2418	HI	0		1		0	Inch
3200	240755	99999	BIGFORK 12 S	197801	2518	HI	21		1		0.21	Inch
3200	240755	99999	BIGFORK 12 S	197801	2618	HI	22		1		0.22	Inch
3200	240755	99999	BIGFORK 12 S	197801	2718	HI	0		1		0	Inch
3200	240755	99999	BIGFORK 12 S	197801	2818	HI	17		1		0.17	Inch
3200	240755	99999	BIGFORK 12 S	197801	2918	HI	22		1		0.22	Inch
3200	240755	99999	BIGFORK 12 S	197801	3018	HI	0		1		0	Inch
3200	240755	99999	BIGFORK 12 S	197801	3118	HI	23		1		0.23	Inch
3200	240755	99999	BIGFORK 12 S	197802	118	HI	13		1		0.13	Inch
3200	240755	99999	BIGFORK 12 S	197802	218	HI	8		1		0.08	Inch
3200	240755	99999	BIGFORK 12 S	197802	318	HI	7		1		0.07	Inch
3200	240755	99999	BIGFORK 12 S	197802	418	HI	0		1		0	Inch
3200	240755	99999	BIGFORK 12 S	197802	518	HI	0		1		0	Inch
3200	240755	99999	BIGFORK 12 S	197802	618	HI	30		1		0.3	Inch
3200	240755	99999	BIGFORK 12 S	197802	718	HI	0		1		0	Inch
3200	240755	99999	BIGFORK 12 S	197802	818	HI	0		1		0	Inch
3200	240755	99999	BIGFORK 12 S	197802	918	HI	21		1		0.21	Inch
3200	240755	99999	BIGFORK 12 S	197802	1018	HI	5		1		0.05	Inch
3200	240755	99999	BIGFORK 12 S	197802	1118	HI	0		1		0	Inch
3200	240755	99999	BIGFORK 12 S	197802	1218	HI	0		1		0	Inch
3200	240755	99999	BIGFORK 12 S	197802	1318	HI	0		1		0	Inch
3200	240755	99999	BIGFORK 12 S	197802	1418	HI	0		1		0	Inch
3200	240755	99999	BIGFORK 12 S	197802	1518	HI	0		1		0	Inch
3200	240755	99999	BIGFORK 12 S	197802	1618	HI	0		1		0	Inch
3200	240755	99999	BIGFORK 12 S	197802	1718	HI	0		1		0	Inch
3200	240755	99999	BIGFORK 12 S	197802	1818	HI	4		1		0.04	Inch
3200	240755	99999	BIGFORK 12 S	197802	1918	HI	0		1		0	Inch
3200	240755	99999	BIGFORK 12 S	197802	2018	HI	0		1		0	Inch
3200	240755	99999	BIGFORK 12 S	197802	2118	HI	0		1		0	Inch
3200	240755	99999	BIGFORK 12 S	197802	2218	HI	0		1		0	Inch
3200	240755	99999	BIGFORK 12 S	197802	2318	HI	0		1		0	Inch
3200	240755	99999	BIGFORK 12 S	197802	2418	HI	0		1		0	Inch
3200	240755	99999	BIGFORK 12 S	197802	2518	HI	2		1		0.02	Inch
3200	240755	99999	BIGFORK 12 S	197802	2618	HI	0	T	1		0	Inch
3200	240755	99999	BIGFORK 12 S	197802	2718	HI	0		1		0	Inch
3200	240755	99999	BIGFORK 12 S	197802	2818	HI	15		1		0.15	Inch
3200	240755	99999	BIGFORK 12 S	197804	118	HI	2		1		0.02	Inch
3200	240755	99999	BIGFORK 12 S	197804	218	HI	34		1		0.34	Inch
3200	240755	99999	BIGFORK 12 S	197804	318	HI	0		1		0	Inch
3200	240755	99999	BIGFORK 12 S	197804	418	HI	0		1		0	Inch
3200	240755	99999	BIGFORK 12 S	197804	518	HI	5		1		0.05	Inch
3200	240755	99999	BIGFORK 12 S	197804	618	HI	0		1		0	Inch
3200	240755	99999	BIGFORK 12 S	197804	718	HI	0		1		0	Inch
3200	240755	99999	BIGFORK 12 S	197804	818	HI	0		1		0	Inch
3200	240755	99999	BIGFORK 12 S	197804	918	HI	0		1		0	Inch
3200	240755	99999	BIGFORK 12 S	197804	1018	HI	0		1		0	Inch
3200	240755	99999	BIGFORK 12 S	197804	1118	HI	0		1		0	Inch
3200	240755	99999	BIGFORK 12 S	197804	1218	HI	0		1		0	Inch
3200	240755	99999	BIGFORK 12 S	197804	1318	HI	0		1		0	Inch
3200	240755	99999	BIGFORK 12 S	197804	1418	HI	0	T	1		0	Inch
3200	240755	99999	BIGFORK 12 S	197804	1518	HI	0		1		0	Inch
3200	240755	99999	BIGFORK 12 S	197804	1618	HI	0		1		0	Inch
3200	240755	99999	BIGFORK 12 S	197804	1718	HI	48		1		0.48	Inch
3200	240755	99999	BIGFORK 12 S	197804	1818	HI	0		1		0	Inch
3200	240755	99999	BIGFORK 12 S	197804	1918	HI	0		1		0	Inch
3200	240755	99999	BIGFORK 12 S	197804	2018	HI	2		1		0.02	Inch
3200	240755	99999	BIGFORK 12 S	197804	2118	HI	102		1		1.02	Inch
3200	240755	99999	BIGFORK 12 S	197804	2218	HI	0		1		0	Inch
3200	240755	99999	BIGFORK 12 S	197804	2318	HI	21		1		0.21	Inch
3200	240755	99999	BIGFORK 12 S	197804	2418	HI	0		1		0	Inch
3200	240755	99999	BIGFORK 12 S	197804	2518	HI	0		1		0	Inch
3200	240755	99999	BIGFORK 12 S	197804	2618	HI	0	T	1		0	Inch
3200	240755	99999	BIGFORK 12 S	197804	2718	HI	5		1		0.05	Inch
3200	240755	99999	BIGFORK 12 S	197804	2818	HI	0		1		0	Inch
3200	240755	99999	BIGFORK 12 S	197804	2918	HI	0		1		0	Inch
3200	240755	99999	BIGFORK 12 S	197804	3018	HI	0		1		0	Inch
3200	240755	99999	BIGFORK 12 S	197805	118	HI	0		1		0	Inch
3200	240755	99999	BIGFORK 12 S	197805	218	HI	0		1		0	Inch
3200	240755	99999	BIGFORK 12 S	197805	318	HI	0		1		0	Inch
3200	240755	99999	BIGFORK 12 S	197805	418	HI	20		1		0.2	Inch
3200	240755	99999	BIGFORK 12 S	197805	518	HI	0		1		0	Inch
3200	240755	99999	BIGFORK 12 S	197805	618	HI	0		1		0	Inch
3200	240755	99999	BIGFORK 12 S	197805	718	HI	0		1		0	Inch
3200	240755	99999	BIGFORK 12 S	197805	818	HI	0		1		0	Inch
3200	240755	99999	BIGFORK 12 S	197805	918	HI	0	T	1		0	Inch
3200	240755	99999	BIGFORK 12 S	197805	1018	HI	51		1		0.51	Inch
3200	240755	99999	BIGFORK 12 S	197805	1118	HI	0	T	1		0	Inch
3200	240755	99999	BIGFORK 12 S	197805	1218	HI	7		1		0.07	Inch
3200	240755	99999	BIGFORK 12 S	197805	1318	HI	0		1		0	Inch
3200	240755	99999	BIGFORK 12 S	197805	1418	HI	3		1		0.03	Inch
3200	240755	99999	BIGFORK 12 S	197805	1518	HI	8		1		0.08	Inch
3200	240755	99999	BIGFORK 12 S	197805	1618	HI	99999	S	1		99999	Inch
3200	240755	99999	BIGFORK 12 S	197805	1718	HI	11	A	1		0.11	Inch
3200	240755	99999	BIGFORK 12 S	197805	1818	HI	3		1		0.03	Inch
3200	240755	99999	BIGFORK 12 S	197805	1918	HI	0		1		0	Inch
3200	240755	99999	BIGFORK 12 S	197805	2018	HI	0		1		0	Inch
3200	240755	99999	BIGFORK 12 S	197805	2118	HI	3		1		0.03	Inch
3200	240755	99999	BIGFORK 12 S	197805	2218	HI	53		1		0.53	Inch
3200	240755	99999	BIGFORK 12 S	197805	2318	HI	0		1		0	Inch
3200	240755	99999	BIGFORK 12 S	197805	2418	HI	13		1		0.13	Inch
3200	240755	99999	BIGFORK 12 S	197805	2518	HI	0	T	1		0	Inch
3200	240755	99999	BIGFORK 12 S	197805	2618	HI	0		1		0	Inch
3200	240755	99999	BIGFORK 12 S	197805	2718	HI	0	T	1		0	Inch
3200	240755	99999	BIGFORK 12 S	197805	2818	HI	6		1		0.06	Inch
3200	240755	99999	BIGFORK 12 S	197805	2918	HI	28		1		0.28	Inch
3200	240755	99999	BIGFORK 12 S	197805	3018	HI	24		1		0.24	Inch
3200	240755	99999	BIGFORK 12 S	197805	3118	HI	0		1		0	Inch
3200	240755	99999	BIGFORK 12 S	197806	118	HI	0		1		0	Inch
3200	240755	99999	BIGFORK 12 S	197806	218	HI	0		1		0	Inch
3200	240755	99999	BIGFORK 12 S	197806	318	HI	0		1		0	Inch
3200	240755	99999	BIGFORK 12 S	197806	418	HI	0		1		0	Inch
3200	240755	99999	BIGFORK 12 S	197806	518	HI	0		1		0	Inch
3200	240755	99999	BIGFORK 12 S	197806	618	HI	0		1		0	Inch
3200	240755	99999	BIGFORK 12 S	197806	718	HI	0		1		0	Inch
3200	240755	99999	BIGFORK 12 S	197806	818	HI	0		1		0	Inch
3200	240755	99999	BIGFORK 12 S	197806	918	HI	0		1		0	Inch
3200	240755	99999	BIGFORK 12 S	197806	1018	HI	0		1		0	Inch
3200	240755	99999	BIGFORK 12 S	197806	1118	HI	3		1		0.03	Inch
3200	240755	99999	BIGFORK 12 S	197806	1218	HI	0		1		0	Inch
3200	240755	99999	BIGFORK 12 S	197806	1318	HI	0		1		0	Inch
3200	240755	99999	BIGFORK 12 S	197806	1418	HI	0		1		0	Inch
3200	240755	99999	BIGFORK 12 S	197806	1518	HI	0		1		0	Inch
3200	240755	99999	BIGFORK 12 S	197806	1618	HI	0		1		0	Inch
3200	240755	99999	BIGFORK 12 S	197806	1718	HI	0		1		0	Inch
3200	240755	99999	BIGFORK 12 S	197806	1818	HI	0		1		0	Inch
3200	240755	99999	BIGFORK 12 S	197806	1918	HI	2		1		0.02	Inch
3200	240755	99999	BIGFORK 12 S	197806	2018	HI	0		1		0	Inch
3200	240755	99999	BIGFORK 12 S	197806	2118	HI	0		1		0	Inch
3200	240755	99999	BIGFORK 12 S	197806	2218	HI	0	T	1		0	Inch
3200	240755	99999	BIGFORK 12 S	197806	2318	HI	0		1		0	Inch
3200	240755	99999	BIGFORK 12 S	197806	2418	HI	5		1		0.05	Inch
3200	240755	99999	BIGFORK 12 S	197806	2518	HI	214		1		2.14	Inch
3200	240755	99999	BIGFORK 12 S	197806	2618	HI	0		1		0	Inch
3200	240755	99999	BIGFORK 12 S	197806	2718	HI	0		1		0	Inch
3200	240755	99999	BIGFORK 12 S	197806	2818	HI	0		1		0	Inch
3200	240755	99999	BIGFORK 12 S	197806	2918	HI	0		1		0	Inch
3200	240755	99999	BIGFORK 12 S	197806	3018	HI	11		1		0.11	Inch
3200	240755	99999	BIGFORK 12 S	197807	118	HI	0		1		0	Inch
3200	240755	99999	BIGFORK 12 S	197807	218	HI	0		1		0	Inch
3200	240755	99999	BIGFORK 12 S	197807	318	HI	51		1		0.51	Inch
3200	240755	99999	BIGFORK 12 S	197807	418	HI	37		1		0.37	Inch
3200	240755	99999	BIGFORK 12 S	197807	518	HI	0	T	1		0	Inch
3200	240755	99999	BIGFORK 12 S	197807	618	HI	0		1		0	Inch
3200	240755	99999	BIGFORK 12 S	197807	718	HI	0		1		0	Inch
3200	240755	99999	BIGFORK 12 S	197807	818	HI	0	T	1		0	Inch
3200	240755	99999	BIGFORK 12 S	197807	918	HI	0		1		0	Inch
3200	240755	99999	BIGFORK 12 S	197807	1018	HI	63		1		0.63	Inch
3200	240755	99999	BIGFORK 12 S	197807	1118	HI	0		1		0	Inch
3200	240755	99999	BIGFORK 12 S	197807	1218	HI	0		1		0	Inch
3200	240755	99999	BIGFORK 12 S	197807	1318	HI	0		1		0	Inch
3200	240755	99999	BIGFORK 12 S	197807	1418	HI	0		1		0	Inch
3200	240755	99999	BIGFORK 12 S	197807	1518	HI	0		1		0	Inch
3200	240755	99999	BIGFORK 12 S	197807	1618	HI	20		1		0.2	Inch
3200	240755	99999	BIGFORK 12 S	197807	1718	HI	99999	S	1		99999	Inch
3200	240755	99999	BIGFORK 12 S	197807	1818	HI	42	A	1		0.42	Inch
3200	240755	99999	BIGFORK 12 S	197807	1918	HI	99999	S	1		99999	Inch
3200	240755	99999	BIGFORK 12 S	197807	2099	HI	-99999	M			-99999	Inch
3200	240755	99999	BIGFORK 12 S	197807	2199	HI	-99999	M			-99999	Inch
3200	240755	99999	BIGFORK 12 S	197807	2299	HI	-99999	M			-99999	Inch
3200	240755	99999	BIGFORK 12 S	197807	2399	HI	-99999	M			-99999	Inch
3200	240755	99999	BIGFORK 12 S	197807	2499	HI	-99999	M			-99999	Inch
3200	240755	99999	BIGFORK 12 S	197807	2599	HI	-99999	M			-99999	Inch
3200	240755	99999	BIGFORK 12 S	197807	2699	HI	-99999	M			-99999	Inch
3200	240755	99999	BIGFORK 12 S	197807	2718	HI	78	A	1		0.78	Inch
3200	240755	99999	BIGFORK 12 S	197807	2818	HI	0		1		0	Inch
3200	240755	99999	BIGFORK 12 S	197807	2918	HI	0		1		0	Inch
3200	240755	99999	BIGFORK 12 S	197807	3018	HI	0		1		0	Inch
3200	240755	99999	BIGFORK 12 S	197807	3118	HI	0		1		0	Inch
3200	240755	99999	BIGFORK 12 S	197808	118	HI	2		1		0.02	Inch
3200	240755	99999	BIGFORK 12 S	197808	218	HI	0		1		0	Inch
3200	240755	99999	BIGFORK 12 S	197808	318	HI	0		1		0	Inch
3200	240755	99999	BIGFORK 12 S	197808	418	HI	0		1		0	Inch
3200	240755	99999	BIGFORK 12 S	197808	518	HI	0		1		0	Inch
3200	240755	99999	BIGFORK 12 S	197808	618	HI	0		1		0	Inch
3200	240755	99999	BIGFORK 12 S	197808	718	HI	0		1		0	Inch
3200	240755	99999	BIGFORK 12 S	197808	818	HI	0		1		0	Inch
3200	240755	99999	BIGFORK 12 S	197808	918	HI	0		1		0	Inch
3200	240755	99999	BIGFORK 12 S	197808	1018	HI	0		1		0	Inch
3200	240755	99999	BIGFORK 12 S	197808	1118	HI	0		1		0	Inch
3200	240755	99999	BIGFORK 12 S	197808	1218	HI	0		1		0	Inch
3200	240755	99999	BIGFORK 12 S	197808	1318	HI	14		1		0.14	Inch
3200	240755	99999	BIGFORK 12 S	197808	1418	HI	10		1		0.1	Inch
3200	240755	99999	BIGFORK 12 S	197808	1518	HI	8		1		0.08	Inch
3200	240755	99999	BIGFORK 12 S	197808	1618	HI	21		1		0.21	Inch
3200	240755	99999	BIGFORK 12 S	197808	1718	HI	94		1		0.94	Inch
3200	240755	99999	BIGFORK 12 S	197808	1818	HI	10		1		0.1	Inch
3200	240755	99999	BIGFORK 12 S	197808	1918	HI	0	T	1		0	Inch
3200	240755	99999	BIGFORK 12 S	197808	2018	HI	65		1		0.65	Inch
3200	240755	99999	BIGFORK 12 S	197808	2118	HI	8		1		0.08	Inch
3200	240755	99999	BIGFORK 12 S	197808	2218	HI	80		1		0.8	Inch
3200	240755	99999	BIGFORK 12 S	197808	2318	HI	0		1		0	Inch
3200	240755	99999	BIGFORK 12 S	197808	2418	HI	0		1		0	Inch
3200	240755	99999	BIGFORK 12 S	197808	2518	HI	0		1		0	Inch
3200	240755	99999	BIGFORK 12 S	197808	2618	HI	0		1		0	Inch
3200	240755	99999	BIGFORK 12 S	197808	2718	HI	0		1		0	Inch
3200	240755	99999	BIGFORK 12 S	197808	2818	HI	0		1		0	Inch
3200	240755	99999	BIGFORK 12 S	197808	2918	HI	0		1		0	Inch
3200	240755	99999	BIGFORK 12 S	197808	3018	HI	0		1		0	Inch
3200	240755	99999	BIGFORK 12 S	197808	3118	HI	0	T	1		0	Inch
3200	240755	99999	BIGFORK 12 S	197809	118	HI	0		1		0	Inch
3200	240755	99999	BIGFORK 12 S	197809	218	HI	0		1		0	Inch
3200	240755	99999	BIGFORK 12 S	197809	318	HI	0		1		0	Inch
3200	240755	99999	BIGFORK 12 S	197809	418	HI	0		1		0	Inch
3200	240755	99999	BIGFORK 12 S	197809	518	HI	5		1		0.05	Inch
3200	240755	99999	BIGFORK 12 S	197809	618	HI	5		1		0.05	Inch
3200	240755	99999	BIGFORK 12 S	197809	718	HI	77		1		0.77	Inch
3200	240755	99999	BIGFORK 12 S	197809	818	HI	42		1		0.42	Inch
3200	240755	99999	BIGFORK 12 S	197809	918	HI	0		1		0	Inch
3200	240755	99999	BIGFORK 12 S	197809	1018	HI	0		1		0	Inch
3200	240755	99999	BIGFORK 12 S	197809	1118	HI	99999	S	1		99999	Inch
3200	240755	99999	BIGFORK 12 S	197809	1218	HI	85	A	1		0.85	Inch
3200	240755	99999	BIGFORK 12 S	197809	1318	HI	0		1		0	Inch
3200	240755	99999	BIGFORK 12 S	197809	1418	HI	0		1		0	Inch
3200	240755	99999	BIGFORK 12 S	197809	1518	HI	0		1		0	Inch
3200	240755	99999	BIGFORK 12 S	197809	1618	HI	0		1		0	Inch
3200	240755	99999	BIGFORK 12 S	197809	1718	HI	0		1		0	Inch
3200	240755	99999	BIGFORK 12 S	197809	1818	HI	0		1		0	Inch
3200	240755	99999	BIGFORK 12 S	197809	1918	HI	0		1		0	Inch
3200	240755	99999	BIGFORK 12 S	197809	2018	HI	0		1		0	Inch
3200	240755	99999	BIGFORK 12 S	197809	2118	HI	0		1		0	Inch
3200	240755	99999	BIGFORK 12 S	197809	2218	HI	0		1		0	Inch
3200	240755	99999	BIGFORK 12 S	197809	2318	HI	0		1		0	Inch
3200	240755	99999	BIGFORK 12 S	197809	2418	HI	0		1		0	Inch
3200	240755	99999	BIGFORK 12 S	197809	2518	HI	0		1		0	Inch
3200	240755	99999	BIGFORK 12 S	197809	2618	HI	0		1		0	Inch
3200	240755	99999	BIGFORK 12 S	197809	2718	HI	0		1		0	Inch
3200	240755	99999	BIGFORK 12 S	197809	2818	HI	0		1		0	Inch
3200	240755	99999	BIGFORK 12 S	197809	2918	HI	0		1		0	Inch
3200	240755	99999	BIGFORK 12 S	197809	3018	HI	0		1		0	Inch
3200	240755	99999	BIGFORK 12 S	197810	118	HI	0		1		0	Inch
3200	240755	99999	BIGFORK 12 S	197810	218	HI	0		1		0	Inch
3200	240755	99999	BIGFORK 12 S	197810	318	HI	0		1		0	Inch
3200	240755	99999	BIGFORK 12 S	197810	418	HI	0		1		0	Inch
3200	240755	99999	BIGFORK 12 S	197810	518	HI	0		1		0	Inch
3200	240755	99999	BIGFORK 12 S	197810	618	HI	0		1		0	Inch
3200	240755	99999	BIGFORK 12 S	197810	718	HI	0		1		0	Inch
3200	240755	99999	BIGFORK 12 S	197810	818	HI	0		1		0	Inch
3200	240755	99999	BIGFORK 12 S	197810	918	HI	0		1		0	Inch
3200	240755	99999	BIGFORK 12 S	197810	1018	HI	0		1		0	Inch
3200	240755	99999	BIGFORK 12 S	197810	1118	HI	0		1		0	Inch
3200	240755	99999	BIGFORK 12 S	197810	1218	HI	0		1		0	Inch
3200	240755	99999	BIGFORK 12 S	197810	1318	HI	0		1		0	Inch
3200	240755	99999	BIGFORK 12 S	197810	1418	HI	0		1		0	Inch
3200	240755	99999	BIGFORK 12 S	197810	1518	HI	0		1		0	Inch
3200	240755	99999	BIGFORK 12 S	197810	1618	HI	0		1		0	Inch
3200	240755	99999	BIGFORK 12 S	197810	1718	HI	0		1		0	Inch
3200	240755	99999	BIGFORK 12 S	197810	1818	HI	0		1		0	Inch
3200	240755	99999	BIGFORK 12 S	197810	1918	HI	0		1		0	Inch
3200	240755	99999	BIGFORK 12 S	197810	2018	HI	0		1		0	Inch
3200	240755	99999	BIGFORK 12 S	197810	2118	HI	0		1		0	Inch
3200	240755	99999	BIGFORK 12 S	197810	2218	HI	0		1		0	Inch
3200	240755	99999	BIGFORK 12 S	197810	2318	HI	0		1		0	Inch
3200	240755	99999	BIGFORK 12 S	197810	2418	HI	0		1		0	Inch
3200	240755	99999	BIGFORK 12 S	197810	2518	HI	0		1		0	Inch
3200	240755	99999	BIGFORK 12 S	197810	2618	HI	0		1		0	Inch
3200	240755	99999	BIGFORK 12 S	197810	2718	HI	0		1		0	Inch
3200	240755	99999	BIGFORK 12 S	197810	2818	HI	0		1		0	Inch
3200	240755	99999	BIGFORK 12 S	197810	2918	HI	0		1		0	Inch
3200	240755	99999	BIGFORK 12 S	197810	3018	HI	0		1		0	Inch
3200	240755	99999	BIGFORK 12 S	197810	3118	HI	0		1		0	Inch
3200	240755	99999	BIGFORK 12 S	197811	118	HI	0		1		0	Inch
3200	240755	99999	BIGFORK 12 S	197811	218	HI	0		1		0	Inch
3200	240755	99999	BIGFORK 12 S	197811	318	HI	0		1		0	Inch
3200	240755	99999	BIGFORK 12 S	197811	418	HI	23		1		0.23	Inch
3200	240755	99999	BIGFORK 12 S	197811	518	HI	0		1		0	Inch
3200	240755	99999	BIGFORK 12 S	197811	618	HI	0		1		0	Inch
3200	240755	99999	BIGFORK 12 S	197811	718	HI	0		1		0	Inch
3200	240755	99999	BIGFORK 12 S	197811	818	HI	0		1		0	Inch
3200	240755	99999	BIGFORK 12 S	197811	918	HI	0		1		0	Inch
3200	240755	99999	BIGFORK 12 S	197811	1018	HI	0		1		0	Inch
3200	240755	99999	BIGFORK 12 S	197811	1118	HI	0		1		0	Inch
3200	240755	99999	BIGFORK 12 S	197811	1218	HI	0		1		0	Inch
3200	240755	99999	BIGFORK 12 S	197811	1318	HI	6		1		0.06	Inch
3200	240755	99999	BIGFORK 12 S	197811	1418	HI	0		1		0	Inch
3200	240755	99999	BIGFORK 12 S	197811	1518	HI	0		1		0	Inch
3200	240755	99999	BIGFORK 12 S	197811	1618	HI	7		1		0.07	Inch
3200	240755	99999	BIGFORK 12 S	197811	1718	HI	9		1		0.09	Inch
3200	240755	99999	BIGFORK 12 S	197811	1818	HI	35		1		0.35	Inch
3200	240755	99999	BIGFORK 12 S	197811	1918	HI	0	T	1		0	Inch
3200	240755	99999	BIGFORK 12 S	197811	2018	HI	8		1		0.08	Inch
3200	240755	99999	BIGFORK 12 S	197811	2118	HI	1		1		0.01	Inch
3200	240755	99999	BIGFORK 12 S	197811	2218	HI	0		1		0	Inch
3200	240755	99999	BIGFORK 12 S	197811	2318	HI	0		1		0	Inch
3200	240755	99999	BIGFORK 12 S	197811	2418	HI	0		1		0	Inch
3200	240755	99999	BIGFORK 12 S	197811	2518	HI	0		1		0	Inch
3200	240755	99999	BIGFORK 12 S	197811	2618	HI	0		1		0	Inch
3200	240755	99999	BIGFORK 12 S	197811	2718	HI	0		1		0	Inch
3200	240755	99999	BIGFORK 12 S	197811	2818	HI	26		1		0.26	Inch
3200	240755	99999	BIGFORK 12 S	197811	2918	HI	0		1		0	Inch
3200	240755	99999	BIGFORK 12 S	197811	3018	HI	21		1		0.21	Inch
3200	240755	99999	BIGFORK 12 S	197812	118	HI	2		1		0.02	Inch
3200	240755	99999	BIGFORK 12 S	197812	218	HI	99999	S	1		99999	Inch
3200	240755	99999	BIGFORK 12 S	197812	399	HI	-99999	M			-99999	Inch
3200	240755	99999	BIGFORK 12 S	197812	499	HI	-99999	M			-99999	Inch
3200	240755	99999	BIGFORK 12 S	197812	599	HI	-99999	M			-99999	Inch
3200	240755	99999	BIGFORK 12 S	197812	618	HI	32	A	1		0.32	Inch
3200	240755	99999	BIGFORK 12 S	197812	718	HI	2		1		0.02	Inch
3200	240755	99999	BIGFORK 12 S	197812	818	HI	4		1		0.04	Inch
3200	240755	99999	BIGFORK 12 S	197812	918	HI	29		1		0.29	Inch
3200	240755	99999	BIGFORK 12 S	197812	1018	HI	0	T	1		0	Inch
3200	240755	99999	BIGFORK 12 S	197812	1118	HI	0		1		0	Inch
3200	240755	99999	BIGFORK 12 S	197812	1218	HI	0		1		0	Inch
3200	240755	99999	BIGFORK 12 S	197812	1318	HI	0		1		0	Inch
3200	240755	99999	BIGFORK 12 S	197812	1418	HI	0		1		0	Inch
3200	240755	99999	BIGFORK 12 S	197812	1518	HI	0		1		0	Inch
3200	240755	99999	BIGFORK 12 S	197812	1618	HI	0		1		0	Inch
3200	240755	99999	BIGFORK 12 S	197812	1718	HI	0		1		0	Inch
3200	240755	99999	BIGFORK 12 S	197812	1818	HI	10		1		0.1	Inch
3200	240755	99999	BIGFORK 12 S	197812	1918	HI	2		1		0.02	Inch
3200	240755	99999	BIGFORK 12 S	197812	2018	HI	0		1		0	Inch
3200	240755	99999	BIGFORK 12 S	197812	2118	HI	5		1		0.05	Inch
3200	240755	99999	BIGFORK 12 S	197812	2218	HI	99999	S	1		99999	Inch
3200	240755	99999	BIGFORK 12 S	197812	2399	HI	-99999	M			-99999	Inch
3200	240755	99999	BIGFORK 12 S	197812	2499	HI	-99999	M			-99999	Inch
3200	240755	99999	BIGFORK 12 S	197812	2599	HI	-99999	M			-99999	Inch
3200	240755	99999	BIGFORK 12 S	197812	2699	HI	-99999	M			-99999	Inch
3200	240755	99999	BIGFORK 12 S	197812	2718	HI	36	A	1		0.36	Inch
3200	240755	99999	BIGFORK 12 S	197812	2818	HI	0		1		0	Inch
3200	240755	99999	BIGFORK 12 S	197812	2918	HI	8		1		0.08	Inch
3200	240755	99999	BIGFORK 12 S	197812	3018	HI	37		1		0.37	Inch
3200	240755	99999	BIGFORK 12 S	197812	3118	HI	10		1		0.1	Inch
3200	240755	99999	BIGFORK 12 S	197901	118	HI	21				0.21	Inch
3200	240755	99999	BIGFORK 12 S	197901	218	HI	7				0.07	Inch
3200	240755	99999	BIGFORK 12 S	197901	318	HI	0	T			0	Inch
3200	240755	99999	BIGFORK 12 S	197901	418	HI	0				0	Inch
3200	240755	99999	BIGFORK 12 S	197901	518	HI	2				0.02	Inch
3200	240755	99999	BIGFORK 12 S	197901	618	HI	4				0.04	Inch
3200	240755	99999	BIGFORK 12 S	197901	718	HI	2				0.02	Inch
3200	240755	99999	BIGFORK 12 S	197901	818	HI	0				0	Inch
3200	240755	99999	BIGFORK 12 S	197901	918	HI	0				0	Inch
3200	240755	99999	BIGFORK 12 S	197901	1018	HI	32				0.32	Inch
3200	240755	99999	BIGFORK 12 S	197901	1118	HI	2				0.02	Inch
3200	240755	99999	BIGFORK 12 S	197901	1218	HI	12				0.12	Inch
3200	240755	99999	BIGFORK 12 S	197901	1318	HI	31				0.31	Inch
3200	240755	99999	BIGFORK 12 S	197901	1418	HI	0				0	Inch
3200	240755	99999	BIGFORK 12 S	197901	1518	HI	35				0.35	Inch
3200	240755	99999	BIGFORK 12 S	197901	1618	HI	1				0.01	Inch
3200	240755	99999	BIGFORK 12 S	197901	1718	HI	0	T			0	Inch
3200	240755	99999	BIGFORK 12 S	197901	1818	HI	0				0	Inch
3200	240755	99999	BIGFORK 12 S	197901	1918	HI	0				0	Inch
3200	240755	99999	BIGFORK 12 S	197901	2018	HI	0				0	Inch
3200	240755	99999	BIGFORK 12 S	197901	2118	HI	74				0.74	Inch
3200	240755	99999	BIGFORK 12 S	197901	2218	HI	0				0	Inch
3200	240755	99999	BIGFORK 12 S	197901	2318	HI	0				0	Inch
3200	240755	99999	BIGFORK 12 S	197901	2418	HI	0				0	Inch
3200	240755	99999	BIGFORK 12 S	197901	2518	HI	0				0	Inch
3200	240755	99999	BIGFORK 12 S	197901	2618	HI	0				0	Inch
3200	240755	99999	BIGFORK 12 S	197901	2718	HI	0				0	Inch
3200	240755	99999	BIGFORK 12 S	197901	2818	HI	5				0.05	Inch
3200	240755	99999	BIGFORK 12 S	197901	2918	HI	0				0	Inch
3200	240755	99999	BIGFORK 12 S	197901	3018	HI	0				0	Inch
3200	240755	99999	BIGFORK 12 S	197901	3118	HI	0				0	Inch
3200	240755	99999	BIGFORK 12 S	197902	118	HI	0				0	Inch
3200	240755	99999	BIGFORK 12 S	197902	218	HI	4				0.04	Inch
3200	240755	99999	BIGFORK 12 S	197902	318	HI	32				0.32	Inch
3200	240755	99999	BIGFORK 12 S	197902	418	HI	0	T			0	Inch
3200	240755	99999	BIGFORK 12 S	197902	518	HI	4				0.04	Inch
3200	240755	99999	BIGFORK 12 S	197902	618	HI	0				0	Inch
3200	240755	99999	BIGFORK 12 S	197902	718	HI	1				0.01	Inch
3200	240755	99999	BIGFORK 12 S	197902	818	HI	0				0	Inch
3200	240755	99999	BIGFORK 12 S	197902	918	HI	0				0	Inch
3200	240755	99999	BIGFORK 12 S	197902	1018	HI	15				0.15	Inch
3200	240755	99999	BIGFORK 12 S	197902	1118	HI	10				0.1	Inch
3200	240755	99999	BIGFORK 12 S	197902	1218	HI	20				0.2	Inch
3200	240755	99999	BIGFORK 12 S	197902	1318	HI	20				0.2	Inch
3200	240755	99999	BIGFORK 12 S	197902	1418	HI	5				0.05	Inch
3200	240755	99999	BIGFORK 12 S	197902	1518	HI	0				0	Inch
3200	240755	99999	BIGFORK 12 S	197902	1618	HI	0				0	Inch
3200	240755	99999	BIGFORK 12 S	197902	1718	HI	17				0.17	Inch
3200	240755	99999	BIGFORK 12 S	197902	1818	HI	0				0	Inch
3200	240755	99999	BIGFORK 12 S	197902	1918	HI	10				0.1	Inch
3200	240755	99999	BIGFORK 12 S	197902	2018	HI	0				0	Inch
3200	240755	99999	BIGFORK 12 S	197902	2118	HI	25				0.25	Inch
3200	240755	99999	BIGFORK 12 S	197902	2218	HI	10				0.1	Inch
3200	240755	99999	BIGFORK 12 S	197902	2318	HI	2				0.02	Inch
3200	240755	99999	BIGFORK 12 S	197902	2418	HI	13				0.13	Inch
3200	240755	99999	BIGFORK 12 S	197902	2518	HI	0				0	Inch
3200	240755	99999	BIGFORK 12 S	197902	2618	HI	11				0.11	Inch
3200	240755	99999	BIGFORK 12 S	197902	2718	HI	0				0	Inch
3200	240755	99999	BIGFORK 12 S	197902	2818	HI	29				0.29	Inch
3200	240755	99999	BIGFORK 12 S	197903	118	HI	0				0	Inch
3200	240755	99999	BIGFORK 12 S	197903	218	HI	0				0	Inch
3200	240755	99999	BIGFORK 12 S	197903	318	HI	0				0	Inch
3200	240755	99999	BIGFORK 12 S	197903	418	HI	0				0	Inch
3200	240755	99999	BIGFORK 12 S	197903	518	HI	0				0	Inch
3200	240755	99999	BIGFORK 12 S	197903	618	HI	1				0.01	Inch
3200	240755	99999	BIGFORK 12 S	197903	718	HI	0				0	Inch
3200	240755	99999	BIGFORK 12 S	197903	818	HI	0				0	Inch
3200	240755	99999	BIGFORK 12 S	197903	918	HI	0				0	Inch
3200	240755	99999	BIGFORK 12 S	197903	1018	HI	0				0	Inch
3200	240755	99999	BIGFORK 12 S	197903	1118	HI	0				0	Inch
3200	240755	99999	BIGFORK 12 S	197903	1218	HI	0				0	Inch
3200	240755	99999	BIGFORK 12 S	197903	1318	HI	0				0	Inch
3200	240755	99999	BIGFORK 12 S	197903	1418	HI	0				0	Inch
3200	240755	99999	BIGFORK 12 S	197903	1518	HI	0				0	Inch
3200	240755	99999	BIGFORK 12 S	197903	1618	HI	16				0.16	Inch
3200	240755	99999	BIGFORK 12 S	197903	1718	HI	0				0	Inch
3200	240755	99999	BIGFORK 12 S	197903	1818	HI	0				0	Inch
3200	240755	99999	BIGFORK 12 S	197903	1918	HI	0				0	Inch
3200	240755	99999	BIGFORK 12 S	197903	2018	HI	0				0	Inch
3200	240755	99999	BIGFORK 12 S	197903	2118	HI	0				0	Inch
3200	240755	99999	BIGFORK 12 S	197903	2218	HI	0				0	Inch
3200	240755	99999	BIGFORK 12 S	197903	2318	HI	0				0	Inch
3200	240755	99999	BIGFORK 12 S	197903	2418	HI	0				0	Inch
3200	240755	99999	BIGFORK 12 S	197903	2518	HI	0				0	Inch
3200	240755	99999	BIGFORK 12 S	197903	2618	HI	0				0	Inch
3200	240755	99999	BIGFORK 12 S	197903	2718	HI	38				0.38	Inch
3200	240755	99999	BIGFORK 12 S	197903	2818	HI	13				0.13	Inch
3200	240755	99999	BIGFORK 12 S	197903	2918	HI	3				0.03	Inch
3200	240755	99999	BIGFORK 12 S	197903	3018	HI	1				0.01	Inch
3200	240755	99999	BIGFORK 12 S	197903	3118	HI	0				0	Inch
3200	240755	99999	BIGFORK 12 S	197904	118	HI	0				0	Inch
3200	240755	99999	BIGFORK 12 S	197904	218	HI	3				0.03	Inch
3200	240755	99999	BIGFORK 12 S	197904	318	HI	0				0	Inch
3200	240755	99999	BIGFORK 12 S	197904	418	HI	0				0	Inch
3200	240755	99999	BIGFORK 12 S	197904	518	HI	0				0	Inch
3200	240755	99999	BIGFORK 12 S	197904	618	HI	20				0.2	Inch
3200	240755	99999	BIGFORK 12 S	197904	718	HI	11				0.11	Inch
3200	240755	99999	BIGFORK 12 S	197904	818	HI	0				0	Inch
3200	240755	99999	BIGFORK 12 S	197904	918	HI	32				0.32	Inch
3200	240755	99999	BIGFORK 12 S	197904	1018	HI	60				0.6	Inch
3200	240755	99999	BIGFORK 12 S	197904	1118	HI	0				0	Inch
3200	240755	99999	BIGFORK 12 S	197904	1218	HI	0				0	Inch
3200	240755	99999	BIGFORK 12 S	197904	1318	HI	2				0.02	Inch
3200	240755	99999	BIGFORK 12 S	197904	1418	HI	0				0	Inch
3200	240755	99999	BIGFORK 12 S	197904	1518	HI	0				0	Inch
3200	240755	99999	BIGFORK 12 S	197904	1618	HI	0				0	Inch
3200	240755	99999	BIGFORK 12 S	197904	1718	HI	40				0.4	Inch
3200	240755	99999	BIGFORK 12 S	197904	1818	HI	0				0	Inch
3200	240755	99999	BIGFORK 12 S	197904	1918	HI	13				0.13	Inch
3200	240755	99999	BIGFORK 12 S	197904	2018	HI	0				0	Inch
3200	240755	99999	BIGFORK 12 S	197904	2118	HI	0				0	Inch
3200	240755	99999	BIGFORK 12 S	197904	2218	HI	0				0	Inch
3200	240755	99999	BIGFORK 12 S	197904	2318	HI	0				0	Inch
3200	240755	99999	BIGFORK 12 S	197904	2418	HI	0				0	Inch
3200	240755	99999	BIGFORK 12 S	197904	2518	HI	0				0	Inch
3200	240755	99999	BIGFORK 12 S	197904	2618	HI	0				0	Inch
3200	240755	99999	BIGFORK 12 S	197904	2718	HI	0				0	Inch
3200	240755	99999	BIGFORK 12 S	197904	2818	HI	0				0	Inch
3200	240755	99999	BIGFORK 12 S	197904	2918	HI	0				0	Inch
3200	240755	99999	BIGFORK 12 S	197904	3018	HI	0				0	Inch
3200	240755	99999	BIGFORK 12 S	197905	118	HI	3				0.03	Inch
3200	240755	99999	BIGFORK 12 S	197905	218	HI	0				0	Inch
3200	240755	99999	BIGFORK 12 S	197905	318	HI	0				0	Inch
3200	240755	99999	BIGFORK 12 S	197905	418	HI	25				0.25	Inch
3200	240755	99999	BIGFORK 12 S	197905	518	HI	65				0.65	Inch
3200	240755	99999	BIGFORK 12 S	197905	618	HI	74				0.74	Inch
3200	240755	99999	BIGFORK 12 S	197905	718	HI	0				0	Inch
3200	240755	99999	BIGFORK 12 S	197905	818	HI	0				0	Inch
3200	240755	99999	BIGFORK 12 S	197905	918	HI	0				0	Inch
3200	240755	99999	BIGFORK 12 S	197905	1018	HI	0				0	Inch
3200	240755	99999	BIGFORK 12 S	197905	1118	HI	0				0	Inch
3200	240755	99999	BIGFORK 12 S	197905	1218	HI	0				0	Inch
3200	240755	99999	BIGFORK 12 S	197905	1318	HI	0				0	Inch
3200	240755	99999	BIGFORK 12 S	197905	1418	HI	0				0	Inch
3200	240755	99999	BIGFORK 12 S	197905	1518	HI	0				0	Inch
3200	240755	99999	BIGFORK 12 S	197905	1618	HI	0				0	Inch
3200	240755	99999	BIGFORK 12 S	197905	1718	HI	0				0	Inch
3200	240755	99999	BIGFORK 12 S	197905	1818	HI	0				0	Inch
3200	240755	99999	BIGFORK 12 S	197905	1918	HI	0				0	Inch
3200	240755	99999	BIGFORK 12 S	197905	2018	HI	0				0	Inch
3200	240755	99999	BIGFORK 12 S	197905	2118	HI	0				0	Inch
3200	240755	99999	BIGFORK 12 S	197905	2218	HI	0				0	Inch
3200	240755	99999	BIGFORK 12 S	197905	2318	HI	0				0	Inch
3200	240755	99999	BIGFORK 12 S	197905	2418	HI	36				0.36	Inch
3200	240755	99999	BIGFORK 12 S	197905	2518	HI	0				0	Inch
3200	240755	99999	BIGFORK 12 S	197905	2618	HI	0				0	Inch
3200	240755	99999	BIGFORK 12 S	197905	2718	HI	0				0	Inch
3200	240755	99999	BIGFORK 12 S	197905	2818	HI	0				0	Inch
3200	240755	99999	BIGFORK 12 S	197905	2918	HI	0				0	Inch
3200	240755	99999	BIGFORK 12 S	197905	3018	HI	2				0.02	Inch
3200	240755	99999	BIGFORK 12 S	197905	3118	HI	0				0	Inch
3200	240755	99999	BIGFORK 12 S	197906	118	HI	0				0	Inch
3200	240755	99999	BIGFORK 12 S	197906	218	HI	0				0	Inch
3200	240755	99999	BIGFORK 12 S	197906	318	HI	0				0	Inch
3200	240755	99999	BIGFORK 12 S	197906	418	HI	0				0	Inch
3200	240755	99999	BIGFORK 12 S	197906	518	HI	0				0	Inch
3200	240755	99999	BIGFORK 12 S	197906	618	HI	27				0.27	Inch
3200	240755	99999	BIGFORK 12 S	197906	718	HI	0				0	Inch
3200	240755	99999	BIGFORK 12 S	197906	818	HI	0				0	Inch
3200	240755	99999	BIGFORK 12 S	197906	918	HI	0				0	Inch
3200	240755	99999	BIGFORK 12 S	197906	1018	HI	0				0	Inch
3200	240755	99999	BIGFORK 12 S	197906	1118	HI	0				0	Inch
3200	240755	99999	BIGFORK 12 S	197906	1218	HI	0				0	Inch
3200	240755	99999	BIGFORK 12 S	197906	1318	HI	0				0	Inch
3200	240755	99999	BIGFORK 12 S	197906	1418	HI	0				0	Inch
3200	240755	99999	BIGFORK 12 S	197906	1518	HI	0				0	Inch
3200	240755	99999	BIGFORK 12 S	197906	1618	HI	0				0	Inch
3200	240755	99999	BIGFORK 12 S	197906	1718	HI	0				0	Inch
3200	240755	99999	BIGFORK 12 S	197906	1818	HI	0				0	Inch
3200	240755	99999	BIGFORK 12 S	197906	1918	HI	0				0	Inch
3200	240755	99999	BIGFORK 12 S	197906	2018	HI	26				0.26	Inch
3200	240755	99999	BIGFORK 12 S	197906	2118	HI	0				0	Inch
3200	240755	99999	BIGFORK 12 S	197906	2218	HI	0				0	Inch
3200	240755	99999	BIGFORK 12 S	197906	2318	HI	0				0	Inch
3200	240755	99999	BIGFORK 12 S	197906	2418	HI	0				0	Inch
3200	240755	99999	BIGFORK 12 S	197906	2518	HI	0				0	Inch
3200	240755	99999	BIGFORK 12 S	197906	2618	HI	0				0	Inch
3200	240755	99999	BIGFORK 12 S	197906	2718	HI	0				0	Inch
3200	240755	99999	BIGFORK 12 S	197906	2818	HI	0				0	Inch
3200	240755	99999	BIGFORK 12 S	197906	2918	HI	0				0	Inch
3200	240755	99999	BIGFORK 12 S	197906	3018	HI	0				0	Inch
3200	240755	99999	BIGFORK 12 S	197908	118	HI	0		1		0	Inch
3200	240755	99999	BIGFORK 12 S	197908	218	HI	0		1		0	Inch
3200	240755	99999	BIGFORK 12 S	197908	318	HI	0		1		0	Inch
3200	240755	99999	BIGFORK 12 S	197908	418	HI	0		1		0	Inch
3200	240755	99999	BIGFORK 12 S	197908	518	HI	0		1		0	Inch
3200	240755	99999	BIGFORK 12 S	197908	618	HI	0		1		0	Inch
3200	240755	99999	BIGFORK 12 S	197908	718	HI	0		1		0	Inch
3200	240755	99999	BIGFORK 12 S	197908	818	HI	0		1		0	Inch
3200	240755	99999	BIGFORK 12 S	197908	918	HI	0		1		0	Inch
3200	240755	99999	BIGFORK 12 S	197908	1018	HI	0		1		0	Inch
3200	240755	99999	BIGFORK 12 S	197908	1118	HI	0		1		0	Inch
3200	240755	99999	BIGFORK 12 S	197908	1218	HI	0		1		0	Inch
3200	240755	99999	BIGFORK 12 S	197908	1318	HI	0		1		0	Inch
3200	240755	99999	BIGFORK 12 S	197908	1418	HI	0		1		0	Inch
3200	240755	99999	BIGFORK 12 S	197908	1518	HI	0		1		0	Inch
3200	240755	99999	BIGFORK 12 S	197908	1618	HI	0		1		0	Inch
3200	240755	99999	BIGFORK 12 S	197908	1718	HI	0		1		0	Inch
3200	240755	99999	BIGFORK 12 S	197908	1818	HI	0		1		0	Inch
3200	240755	99999	BIGFORK 12 S	197908	1918	HI	0		1		0	Inch
3200	240755	99999	BIGFORK 12 S	197908	2018	HI	99999	S	1		99999	Inch
3200	240755	99999	BIGFORK 12 S	197908	2199	HI	-99999	M			-99999	Inch
3200	240755	99999	BIGFORK 12 S	197908	2299	HI	-99999	M			-99999	Inch
3200	240755	99999	BIGFORK 12 S	197908	2399	HI	-99999	M			-99999	Inch
3200	240755	99999	BIGFORK 12 S	197908	2418	HI	60	A	1		0.6	Inch
3200	240755	99999	BIGFORK 12 S	197908	2518	HI	0		1		0	Inch
3200	240755	99999	BIGFORK 12 S	197908	2618	HI	0		1		0	Inch
3200	240755	99999	BIGFORK 12 S	197908	2718	HI	0		1		0	Inch
3200	240755	99999	BIGFORK 12 S	197908	2818	HI	0		1		0	Inch
3200	240755	99999	BIGFORK 12 S	197908	2918	HI	0		1		0	Inch
3200	240755	99999	BIGFORK 12 S	197908	3018	HI	0		1		0	Inch
3200	240755	99999	BIGFORK 12 S	197908	3199	HI	-99999	M			-99999	Inch
3200	240755	99999	BIGFORK 12 S	197909	199	HI	-99999	M			-99999	Inch
3200	240755	99999	BIGFORK 12 S	197909	299	HI	-99999	M			-99999	Inch
3200	240755	99999	BIGFORK 12 S	197909	399	HI	-99999	M			-99999	Inch
3200	240755	99999	BIGFORK 12 S	197909	499	HI	-99999	M			-99999	Inch
3200	240755	99999	BIGFORK 12 S	197909	599	HI	-99999	M			-99999	Inch
3200	240755	99999	BIGFORK 12 S	197909	699	HI	-99999	M			-99999	Inch
3200	240755	99999	BIGFORK 12 S	197909	799	HI	-99999	M			-99999	Inch
3200	240755	99999	BIGFORK 12 S	197909	899	HI	-99999	M			-99999	Inch
3200	240755	99999	BIGFORK 12 S	197909	999	HI	-99999	M			-99999	Inch
3200	240755	99999	BIGFORK 12 S	197909	1099	HI	-99999	M			-99999	Inch
3200	240755	99999	BIGFORK 12 S	197909	1199	HI	-99999	M			-99999	Inch
3200	240755	99999	BIGFORK 12 S	197909	1299	HI	-99999	M			-99999	Inch
3200	240755	99999	BIGFORK 12 S	197909	1399	HI	-99999	M			-99999	Inch
3200	240755	99999	BIGFORK 12 S	197909	1499	HI	-99999	M			-99999	Inch
3200	240755	99999	BIGFORK 12 S	197909	1599	HI	-99999	M			-99999	Inch
3200	240755	99999	BIGFORK 12 S	197909	1699	HI	-99999	M			-99999	Inch
3200	240755	99999	BIGFORK 12 S	197909	1799	HI	-99999	M			-99999	Inch
3200	240755	99999	BIGFORK 12 S	197909	1899	HI	-99999	M			-99999	Inch
3200	240755	99999	BIGFORK 12 S	197909	1999	HI	-99999	M			-99999	Inch
3200	240755	99999	BIGFORK 12 S	197909	2018	HI	0		1		0	Inch
3200	240755	99999	BIGFORK 12 S	197909	2118	HI	0		1		0	Inch
3200	240755	99999	BIGFORK 12 S	197909	2218	HI	0		1		0	Inch
3200	240755	99999	BIGFORK 12 S	197909	2318	HI	0		1		0	Inch
3200	240755	99999	BIGFORK 12 S	197909	2418	HI	0		1		0	Inch
3200	240755	99999	BIGFORK 12 S	197909	2518	HI	0		1		0	Inch
3200	240755	99999	BIGFORK 12 S	197909	2618	HI	0		1		0	Inch
3200	240755	99999	BIGFORK 12 S	197909	2718	HI	0		1		0	Inch
3200	240755	99999	BIGFORK 12 S	197909	2818	HI	0		1		0	Inch
3200	240755	99999	BIGFORK 12 S	197909	2918	HI	0		1		0	Inch
3200	240755	99999	BIGFORK 12 S	197909	3018	HI	0		1		0	Inch
3200	240755	99999	BIGFORK 12 S	197910	118	HI	0		1		0	Inch
3200	240755	99999	BIGFORK 12 S	197910	218	HI	0		1		0	Inch
3200	240755	99999	BIGFORK 12 S	197910	318	HI	0		1		0	Inch
3200	240755	99999	BIGFORK 12 S	197910	418	HI	0	T	1		0	Inch
3200	240755	99999	BIGFORK 12 S	197910	518	HI	0		1		0	Inch
3200	240755	99999	BIGFORK 12 S	197910	618	HI	0		1		0	Inch
3200	240755	99999	BIGFORK 12 S	197910	718	HI	0		1		0	Inch
3200	240755	99999	BIGFORK 12 S	197910	818	HI	0		1		0	Inch
3200	240755	99999	BIGFORK 12 S	197910	918	HI	0		1		0	Inch
3200	240755	99999	BIGFORK 12 S	197910	1018	HI	0		1		0	Inch
3200	240755	99999	BIGFORK 12 S	197910	1118	HI	0		1		0	Inch
3200	240755	99999	BIGFORK 12 S	197910	1218	HI	0		1		0	Inch
3200	240755	99999	BIGFORK 12 S	197910	1318	HI	0		1		0	Inch
3200	240755	99999	BIGFORK 12 S	197910	1418	HI	0		1		0	Inch
3200	240755	99999	BIGFORK 12 S	197910	1518	HI	38		1		0.38	Inch
3200	240755	99999	BIGFORK 12 S	197910	1618	HI	5		1		0.05	Inch
3200	240755	99999	BIGFORK 12 S	197910	1718	HI	10		1		0.1	Inch
3200	240755	99999	BIGFORK 12 S	197910	1818	HI	4		1		0.04	Inch
3200	240755	99999	BIGFORK 12 S	197910	1918	HI	101		1		1.01	Inch
3200	240755	99999	BIGFORK 12 S	197910	2018	HI	0		1		0	Inch
3200	240755	99999	BIGFORK 12 S	197910	2118	HI	59		1		0.59	Inch
3200	240755	99999	BIGFORK 12 S	197910	2218	HI	0	T	1		0	Inch
3200	240755	99999	BIGFORK 12 S	197910	2318	HI	3		1		0.03	Inch
3200	240755	99999	BIGFORK 12 S	197910	2418	HI	0	T	1		0	Inch
3200	240755	99999	BIGFORK 12 S	197910	2518	HI	12		1		0.12	Inch
3200	240755	99999	BIGFORK 12 S	197910	2618	HI	23		1		0.23	Inch
3200	240755	99999	BIGFORK 12 S	197910	2718	HI	4		1		0.04	Inch
3200	240755	99999	BIGFORK 12 S	197910	2818	HI	2		1		0.02	Inch
3200	240755	99999	BIGFORK 12 S	197910	2918	HI	0		1		0	Inch
3200	240755	99999	BIGFORK 12 S	197910	3018	HI	0		1		0	Inch
3200	240755	99999	BIGFORK 12 S	197910	3118	HI	0		1		0	Inch
3200	240755	99999	BIGFORK 12 S	197911	118	HI	0		1		0	Inch
3200	240755	99999	BIGFORK 12 S	197911	218	HI	0		1		0	Inch
3200	240755	99999	BIGFORK 12 S	197911	318	HI	0		1		0	Inch
3200	240755	99999	BIGFORK 12 S	197911	418	HI	0		1		0	Inch
3200	240755	99999	BIGFORK 12 S	197911	518	HI	0		1		0	Inch
3200	240755	99999	BIGFORK 12 S	197911	618	HI	0		1		0	Inch
3200	240755	99999	BIGFORK 12 S	197911	718	HI	0		1		0	Inch
3200	240755	99999	BIGFORK 12 S	197911	818	HI	0		1		0	Inch
3200	240755	99999	BIGFORK 12 S	197911	918	HI	0		1		0	Inch
3200	240755	99999	BIGFORK 12 S	197911	1018	HI	3		1		0.03	Inch
3200	240755	99999	BIGFORK 12 S	197911	1118	HI	0		1		0	Inch
3200	240755	99999	BIGFORK 12 S	197911	1218	HI	0		1		0	Inch
3200	240755	99999	BIGFORK 12 S	197911	1318	HI	0		1		0	Inch
3200	240755	99999	BIGFORK 12 S	197911	1418	HI	0		1		0	Inch
3200	240755	99999	BIGFORK 12 S	197911	1518	HI	0		1		0	Inch
3200	240755	99999	BIGFORK 12 S	197911	1618	HI	0		1		0	Inch
3200	240755	99999	BIGFORK 12 S	197911	1718	HI	33		1		0.33	Inch
3200	240755	99999	BIGFORK 12 S	197911	1818	HI	0		1		0	Inch
3200	240755	99999	BIGFORK 12 S	197911	1918	HI	4		1		0.04	Inch
3200	240755	99999	BIGFORK 12 S	197911	2018	HI	0	T	1		0	Inch
3200	240755	99999	BIGFORK 12 S	197911	2118	HI	0		1		0	Inch
3200	240755	99999	BIGFORK 12 S	197911	2218	HI	0		1		0	Inch
3200	240755	99999	BIGFORK 12 S	197911	2318	HI	0		1		0	Inch
3200	240755	99999	BIGFORK 12 S	197911	2418	HI	0		1		0	Inch
3200	240755	99999	BIGFORK 12 S	197911	2518	HI	8		1		0.08	Inch
3200	240755	99999	BIGFORK 12 S	197911	2618	HI	0		1		0	Inch
3200	240755	99999	BIGFORK 12 S	197911	2718	HI	1		1		0.01	Inch
3200	240755	99999	BIGFORK 12 S	197911	2818	HI	0		1		0	Inch
3200	240755	99999	BIGFORK 12 S	197911	2918	HI	0		1		0	Inch
3200	240755	99999	BIGFORK 12 S	197911	3018	HI	0	T	1		0	Inch
3200	240755	99999	BIGFORK 12 S	197912	118	HI	0		1		0	Inch
3200	240755	99999	BIGFORK 12 S	197912	218	HI	10		1		0.1	Inch
3200	240755	99999	BIGFORK 12 S	197912	318	HI	25		1		0.25	Inch
3200	240755	99999	BIGFORK 12 S	197912	418	HI	4		1		0.04	Inch
3200	240755	99999	BIGFORK 12 S	197912	518	HI	0		1		0	Inch
3200	240755	99999	BIGFORK 12 S	197912	618	HI	0		1		0	Inch
3200	240755	99999	BIGFORK 12 S	197912	718	HI	0	T	1		0	Inch
3200	240755	99999	BIGFORK 12 S	197912	818	HI	0		1		0	Inch
3200	240755	99999	BIGFORK 12 S	197912	918	HI	0		1		0	Inch
3200	240755	99999	BIGFORK 12 S	197912	1018	HI	11		1		0.11	Inch
3200	240755	99999	BIGFORK 12 S	197912	1118	HI	0		1		0	Inch
3200	240755	99999	BIGFORK 12 S	197912	1218	HI	4		1		0.04	Inch
3200	240755	99999	BIGFORK 12 S	197912	1318	HI	99999	S	1		99999	Inch
3200	240755	99999	BIGFORK 12 S	197912	1499	HI	-99999	M			-99999	Inch
3200	240755	99999	BIGFORK 12 S	197912	1518	HI	23	A	1		0.23	Inch
3200	240755	99999	BIGFORK 12 S	197912	1618	HI	0		1		0	Inch
3200	240755	99999	BIGFORK 12 S	197912	1718	HI	0		1		0	Inch
3200	240755	99999	BIGFORK 12 S	197912	1818	HI	0		1		0	Inch
3200	240755	99999	BIGFORK 12 S	197912	1918	HI	9		1		0.09	Inch
3200	240755	99999	BIGFORK 12 S	197912	2018	HI	0		1		0	Inch
3200	240755	99999	BIGFORK 12 S	197912	2118	HI	0		1		0	Inch
3200	240755	99999	BIGFORK 12 S	197912	2218	HI	2		1		0.02	Inch
3200	240755	99999	BIGFORK 12 S	197912	2318	HI	0	T	1		0	Inch
3200	240755	99999	BIGFORK 12 S	197912	2418	HI	0		1		0	Inch
3200	240755	99999	BIGFORK 12 S	197912	2518	HI	29		1		0.29	Inch
3200	240755	99999	BIGFORK 12 S	197912	2618	HI	2		1		0.02	Inch
3200	240755	99999	BIGFORK 12 S	197912	2718	HI	0		1		0	Inch
3200	240755	99999	BIGFORK 12 S	197912	2818	HI	0		1		0	Inch
3200	240755	99999	BIGFORK 12 S	197912	2918	HI	0		1		0	Inch
3200	240755	99999	BIGFORK 12 S	197912	3018	HI	0		1		0	Inch
3200	240755	99999	BIGFORK 12 S	197912	3118	HI	2		1		0.02	Inch
3200	240755	99999	BIGFORK 12 S	198001	118	HI	18		1		0.18	Inch
3200	240755	99999	BIGFORK 12 S	198001	218	HI	6		1		0.06	Inch
3200	240755	99999	BIGFORK 12 S	198001	318	HI	0	T	1		0	Inch
3200	240755	99999	BIGFORK 12 S	198001	418	HI	0		1		0	Inch
3200	240755	99999	BIGFORK 12 S	198001	518	HI	71		1		0.71	Inch
3200	240755	99999	BIGFORK 12 S	198001	618	HI	99999	S	1		99999	Inch
3200	240755	99999	BIGFORK 12 S	198001	718	HI	15	A	1		0.15	Inch
3200	240755	99999	BIGFORK 12 S	198001	818	HI	10		1		0.1	Inch
3200	240755	99999	BIGFORK 12 S	198001	918	HI	20		1		0.2	Inch
3200	240755	99999	BIGFORK 12 S	198001	1018	HI	18		1		0.18	Inch
3200	240755	99999	BIGFORK 12 S	198001	1118	HI	0		1		0	Inch
3200	240755	99999	BIGFORK 12 S	198001	1218	HI	0		1		0	Inch
3200	240755	99999	BIGFORK 12 S	198001	1318	HI	32		1		0.32	Inch
3200	240755	99999	BIGFORK 12 S	198001	1418	HI	0		1		0	Inch
3200	240755	99999	BIGFORK 12 S	198001	1518	HI	0		1		0	Inch
3200	240755	99999	BIGFORK 12 S	198001	1618	HI	0		1		0	Inch
3200	240755	99999	BIGFORK 12 S	198001	1718	HI	19		1		0.19	Inch
3200	240755	99999	BIGFORK 12 S	198001	1818	HI	0		1		0	Inch
3200	240755	99999	BIGFORK 12 S	198001	1918	HI	0		1		0	Inch
3200	240755	99999	BIGFORK 12 S	198001	2018	HI	0		1		0	Inch
3200	240755	99999	BIGFORK 12 S	198001	2118	HI	0		1		0	Inch
3200	240755	99999	BIGFORK 12 S	198001	2218	HI	0		1		0	Inch
3200	240755	99999	BIGFORK 12 S	198001	2318	HI	0		1		0	Inch
3200	240755	99999	BIGFORK 12 S	198001	2418	HI	0		1		0	Inch
3200	240755	99999	BIGFORK 12 S	198001	2518	HI	0		1		0	Inch
3200	240755	99999	BIGFORK 12 S	198001	2618	HI	0		1		0	Inch
3200	240755	99999	BIGFORK 12 S	198001	2718	HI	0		1		0	Inch
3200	240755	99999	BIGFORK 12 S	198001	2818	HI	0		1		0	Inch
3200	240755	99999	BIGFORK 12 S	198001	2918	HI	0		1		0	Inch
3200	240755	99999	BIGFORK 12 S	198001	3018	HI	0		1		0	Inch
3200	240755	99999	BIGFORK 12 S	198001	3118	HI	0		1		0	Inch
3200	240755	99999	BIGFORK 12 S	198002	118	HI	0		1		0	Inch
3200	240755	99999	BIGFORK 12 S	198002	218	HI	0		1		0	Inch
3200	240755	99999	BIGFORK 12 S	198002	318	HI	15		1		0.15	Inch
3200	240755	99999	BIGFORK 12 S	198002	418	HI	0		1		0	Inch
3200	240755	99999	BIGFORK 12 S	198002	518	HI	0		1		0	Inch
3200	240755	99999	BIGFORK 12 S	198002	618	HI	43		1		0.43	Inch
3200	240755	99999	BIGFORK 12 S	198002	718	HI	0	T	1		0	Inch
3200	240755	99999	BIGFORK 12 S	198002	818	HI	0		1		0	Inch
3200	240755	99999	BIGFORK 12 S	198002	918	HI	0		1		0	Inch
3200	240755	99999	BIGFORK 12 S	198002	1018	HI	0		1		0	Inch
3200	240755	99999	BIGFORK 12 S	198002	1118	HI	0		1		0	Inch
3200	240755	99999	BIGFORK 12 S	198002	1218	HI	27		1		0.27	Inch
3200	240755	99999	BIGFORK 12 S	198002	1318	HI	0		1		0	Inch
3200	240755	99999	BIGFORK 12 S	198002	1418	HI	0		1		0	Inch
3200	240755	99999	BIGFORK 12 S	198002	1518	HI	3		1		0.03	Inch
3200	240755	99999	BIGFORK 12 S	198002	1618	HI	0		1		0	Inch
3200	240755	99999	BIGFORK 12 S	198002	1718	HI	0		1		0	Inch
3200	240755	99999	BIGFORK 12 S	198002	1818	HI	16		1		0.16	Inch
3200	240755	99999	BIGFORK 12 S	198002	1918	HI	0		1		0	Inch
3200	240755	99999	BIGFORK 12 S	198002	2018	HI	26		1		0.26	Inch
3200	240755	99999	BIGFORK 12 S	198002	2118	HI	0		1		0	Inch
3200	240755	99999	BIGFORK 12 S	198002	2218	HI	0		1		0	Inch
3200	240755	99999	BIGFORK 12 S	198002	2318	HI	0		1		0	Inch
3200	240755	99999	BIGFORK 12 S	198002	2418	HI	0		1		0	Inch
3200	240755	99999	BIGFORK 12 S	198002	2518	HI	0	T	1		0	Inch
3200	240755	99999	BIGFORK 12 S	198002	2618	HI	1		1		0.01	Inch
3200	240755	99999	BIGFORK 12 S	198002	2718	HI	0		1		0	Inch
3200	240755	99999	BIGFORK 12 S	198002	2818	HI	14		1		0.14	Inch
3200	240755	99999	BIGFORK 12 S	198002	2918	HI	27		1		0.27	Inch
3200	240755	99999	BIGFORK 12 S	198003	118	HI	0		1		0	Inch
3200	240755	99999	BIGFORK 12 S	198003	218	HI	0		1		0	Inch
3200	240755	99999	BIGFORK 12 S	198003	318	HI	25		1		0.25	Inch
3200	240755	99999	BIGFORK 12 S	198003	418	HI	7		1		0.07	Inch
3200	240755	99999	BIGFORK 12 S	198003	518	HI	0	T	1		0	Inch
3200	240755	99999	BIGFORK 12 S	198003	618	HI	0		1		0	Inch
3200	240755	99999	BIGFORK 12 S	198003	718	HI	3		1		0.03	Inch
3200	240755	99999	BIGFORK 12 S	198003	818	HI	0		1		0	Inch
3200	240755	99999	BIGFORK 12 S	198003	918	HI	0	T	1		0	Inch
3200	240755	99999	BIGFORK 12 S	198003	1018	HI	0		1		0	Inch
3200	240755	99999	BIGFORK 12 S	198003	1118	HI	0		1		0	Inch
3200	240755	99999	BIGFORK 12 S	198003	1218	HI	0		1		0	Inch
3200	240755	99999	BIGFORK 12 S	198003	1318	HI	0		1		0	Inch
3200	240755	99999	BIGFORK 12 S	198003	1418	HI	99999	S	1		99999	Inch
3200	240755	99999	BIGFORK 12 S	198003	1599	HI	-99999	M			-99999	Inch
3200	240755	99999	BIGFORK 12 S	198003	1618	HI	57	A	1		0.57	Inch
3200	240755	99999	BIGFORK 12 S	198003	1718	HI	0		1		0	Inch
3200	240755	99999	BIGFORK 12 S	198003	1818	HI	0	T	1		0	Inch
3200	240755	99999	BIGFORK 12 S	198003	1918	HI	5		1		0.05	Inch
3200	240755	99999	BIGFORK 12 S	198003	2018	HI	0		1		0	Inch
3200	240755	99999	BIGFORK 12 S	198003	2118	HI	0		1		0	Inch
3200	240755	99999	BIGFORK 12 S	198003	2218	HI	0		1		0	Inch
3200	240755	99999	BIGFORK 12 S	198003	2318	HI	0		1		0	Inch
3200	240755	99999	BIGFORK 12 S	198003	2418	HI	0		1		0	Inch
3200	240755	99999	BIGFORK 12 S	198003	2518	HI	0		1		0	Inch
3200	240755	99999	BIGFORK 12 S	198003	2618	HI	0		1		0	Inch
3200	240755	99999	BIGFORK 12 S	198003	2718	HI	0	T	1		0	Inch
3200	240755	99999	BIGFORK 12 S	198003	2818	HI	0		1		0	Inch
3200	240755	99999	BIGFORK 12 S	198003	2918	HI	0		1		0	Inch
3200	240755	99999	BIGFORK 12 S	198003	3018	HI	2		1		0.02	Inch
3200	240755	99999	BIGFORK 12 S	198003	3118	HI	0		1		0	Inch
3200	240755	99999	BIGFORK 12 S	198004	118	HI	0		1		0	Inch
3200	240755	99999	BIGFORK 12 S	198004	218	HI	0		1		0	Inch
3200	240755	99999	BIGFORK 12 S	198004	318	HI	0		1		0	Inch
3200	240755	99999	BIGFORK 12 S	198004	418	HI	0		1		0	Inch
3200	240755	99999	BIGFORK 12 S	198004	518	HI	0	T	1		0	Inch
3200	240755	99999	BIGFORK 12 S	198004	618	HI	0		1		0	Inch
3200	240755	99999	BIGFORK 12 S	198004	718	HI	0		1		0	Inch
3200	240755	99999	BIGFORK 12 S	198004	818	HI	0		1		0	Inch
3200	240755	99999	BIGFORK 12 S	198004	918	HI	25		1		0.25	Inch
3200	240755	99999	BIGFORK 12 S	198004	1018	HI	12		1		0.12	Inch
3200	240755	99999	BIGFORK 12 S	198004	1118	HI	9		1		0.09	Inch
3200	240755	99999	BIGFORK 12 S	198004	1218	HI	0		1		0	Inch
3200	240755	99999	BIGFORK 12 S	198004	1318	HI	0		1		0	Inch
3200	240755	99999	BIGFORK 12 S	198004	1418	HI	0		1		0	Inch
3200	240755	99999	BIGFORK 12 S	198004	1518	HI	0		1		0	Inch
3200	240755	99999	BIGFORK 12 S	198004	1618	HI	0		1		0	Inch
3200	240755	99999	BIGFORK 12 S	198004	1718	HI	0		1		0	Inch
3200	240755	99999	BIGFORK 12 S	198004	1818	HI	0		1		0	Inch
3200	240755	99999	BIGFORK 12 S	198004	1918	HI	0		1		0	Inch
3200	240755	99999	BIGFORK 12 S	198004	2018	HI	0		1		0	Inch
3200	240755	99999	BIGFORK 12 S	198004	2118	HI	0		1		0	Inch
3200	240755	99999	BIGFORK 12 S	198004	2218	HI	0		1		0	Inch
3200	240755	99999	BIGFORK 12 S	198004	2318	HI	0		1		0	Inch
3200	240755	99999	BIGFORK 12 S	198004	2418	HI	16		1		0.16	Inch
3200	240755	99999	BIGFORK 12 S	198004	2518	HI	0		1		0	Inch
3200	240755	99999	BIGFORK 12 S	198004	2618	HI	0		1		0	Inch
3200	240755	99999	BIGFORK 12 S	198004	2718	HI	0		1		0	Inch
3200	240755	99999	BIGFORK 12 S	198004	2818	HI	16		1		0.16	Inch
3200	240755	99999	BIGFORK 12 S	198004	2918	HI	0		1		0	Inch
3200	240755	99999	BIGFORK 12 S	198004	3018	HI	130		1		1.3	Inch
3200	240755	99999	BIGFORK 12 S	198005	118	HI	0		1		0	Inch
3200	240755	99999	BIGFORK 12 S	198005	218	HI	10		1		0.1	Inch
3200	240755	99999	BIGFORK 12 S	198005	318	HI	0	T	1		0	Inch
3200	240755	99999	BIGFORK 12 S	198005	418	HI	0		1		0	Inch
3200	240755	99999	BIGFORK 12 S	198005	518	HI	0		1		0	Inch
3200	240755	99999	BIGFORK 12 S	198005	618	HI	0		1		0	Inch
3200	240755	99999	BIGFORK 12 S	198005	718	HI	63		1		0.63	Inch
3200	240755	99999	BIGFORK 12 S	198005	818	HI	0		1		0	Inch
3200	240755	99999	BIGFORK 12 S	198005	918	HI	9		1		0.09	Inch
3200	240755	99999	BIGFORK 12 S	198005	1018	HI	0		1		0	Inch
3200	240755	99999	BIGFORK 12 S	198005	1118	HI	0		1		0	Inch
3200	240755	99999	BIGFORK 12 S	198005	1218	HI	0		1		0	Inch
3200	240755	99999	BIGFORK 12 S	198005	1318	HI	0		1		0	Inch
3200	240755	99999	BIGFORK 12 S	198005	1418	HI	0		1		0	Inch
3200	240755	99999	BIGFORK 12 S	198005	1518	HI	0		1		0	Inch
3200	240755	99999	BIGFORK 12 S	198005	1618	HI	5		1		0.05	Inch
3200	240755	99999	BIGFORK 12 S	198005	1718	HI	0		1		0	Inch
3200	240755	99999	BIGFORK 12 S	198005	1818	HI	0		1		0	Inch
3200	240755	99999	BIGFORK 12 S	198005	1918	HI	0		1		0	Inch
3200	240755	99999	BIGFORK 12 S	198005	2018	HI	0		1		0	Inch
3200	240755	99999	BIGFORK 12 S	198005	2118	HI	0		1		0	Inch
3200	240755	99999	BIGFORK 12 S	198005	2218	HI	81		1		0.81	Inch
3200	240755	99999	BIGFORK 12 S	198005	2318	HI	190		1		1.9	Inch
3200	240755	99999	BIGFORK 12 S	198005	2418	HI	17		1		0.17	Inch
3200	240755	99999	BIGFORK 12 S	198005	2518	HI	109		1		1.09	Inch
3200	240755	99999	BIGFORK 12 S	198005	2618	HI	94		1		0.94	Inch
3200	240755	99999	BIGFORK 12 S	198005	2718	HI	9		1		0.09	Inch
3200	240755	99999	BIGFORK 12 S	198005	2818	HI	0		1		0	Inch
3200	240755	99999	BIGFORK 12 S	198005	2918	HI	0		1		0	Inch
3200	240755	99999	BIGFORK 12 S	198005	3018	HI	21		1		0.21	Inch
3200	240755	99999	BIGFORK 12 S	198005	3118	HI	0	T	1		0	Inch
3200	240755	99999	BIGFORK 12 S	198006	118	HI	99999	S	1		99999	Inch
3200	240755	99999	BIGFORK 12 S	198006	299	HI	-99999	M			-99999	Inch
3200	240755	99999	BIGFORK 12 S	198006	318	HI	108	A	1		1.08	Inch
3200	240755	99999	BIGFORK 12 S	198006	418	HI	0		1		0	Inch
3200	240755	99999	BIGFORK 12 S	198006	518	HI	0		1		0	Inch
3200	240755	99999	BIGFORK 12 S	198006	618	HI	13		1		0.13	Inch
3200	240755	99999	BIGFORK 12 S	198006	718	HI	0		1		0	Inch
3200	240755	99999	BIGFORK 12 S	198006	818	HI	0		1		0	Inch
3200	240755	99999	BIGFORK 12 S	198006	918	HI	0		1		0	Inch
3200	240755	99999	BIGFORK 12 S	198006	1018	HI	0		1		0	Inch
3200	240755	99999	BIGFORK 12 S	198006	1118	HI	0		1		0	Inch
3200	240755	99999	BIGFORK 12 S	198006	1218	HI	43		1		0.43	Inch
3200	240755	99999	BIGFORK 12 S	198006	1318	HI	93		1		0.93	Inch
3200	240755	99999	BIGFORK 12 S	198006	1418	HI	32		1		0.32	Inch
3200	240755	99999	BIGFORK 12 S	198006	1518	HI	0		1		0	Inch
3200	240755	99999	BIGFORK 12 S	198006	1618	HI	0		1		0	Inch
3200	240755	99999	BIGFORK 12 S	198006	1718	HI	0		1		0	Inch
3200	240755	99999	BIGFORK 12 S	198006	1818	HI	0		1		0	Inch
3200	240755	99999	BIGFORK 12 S	198006	1918	HI	0		1		0	Inch
3200	240755	99999	BIGFORK 12 S	198006	2018	HI	0		1		0	Inch
3200	240755	99999	BIGFORK 12 S	198006	2118	HI	0		1		0	Inch
3200	240755	99999	BIGFORK 12 S	198006	2218	HI	8		1		0.08	Inch
3200	240755	99999	BIGFORK 12 S	198006	2318	HI	24		1		0.24	Inch
3200	240755	99999	BIGFORK 12 S	198006	2418	HI	0		1		0	Inch
3200	240755	99999	BIGFORK 12 S	198006	2518	HI	0		1		0	Inch
3200	240755	99999	BIGFORK 12 S	198006	2618	HI	158		1		1.58	Inch
3200	240755	99999	BIGFORK 12 S	198006	2718	HI	62		1		0.62	Inch
3200	240755	99999	BIGFORK 12 S	198006	2818	HI	0		1		0	Inch
3200	240755	99999	BIGFORK 12 S	198006	2918	HI	0		1		0	Inch
3200	240755	99999	BIGFORK 12 S	198006	3018	HI	0		1		0	Inch
3200	240755	99999	BIGFORK 12 S	198008	118	HI	99999	S	1		99999	Inch
3200	240755	99999	BIGFORK 12 S	198008	299	HI	-99999	M			-99999	Inch
3200	240755	99999	BIGFORK 12 S	198008	399	HI	-99999	M			-99999	Inch
3200	240755	99999	BIGFORK 12 S	198008	499	HI	-99999	M			-99999	Inch
3200	240755	99999	BIGFORK 12 S	198008	599	HI	-99999	M			-99999	Inch
3200	240755	99999	BIGFORK 12 S	198008	699	HI	-99999	M			-99999	Inch
3200	240755	99999	BIGFORK 12 S	198008	799	HI	-99999	M			-99999	Inch
3200	240755	99999	BIGFORK 12 S	198008	899	HI	-99999	M			-99999	Inch
3200	240755	99999	BIGFORK 12 S	198008	999	HI	-99999	M			-99999	Inch
3200	240755	99999	BIGFORK 12 S	198008	1099	HI	-99999	M			-99999	Inch
3200	240755	99999	BIGFORK 12 S	198008	1199	HI	-99999	M			-99999	Inch
3200	240755	99999	BIGFORK 12 S	198008	1299	HI	-99999	M			-99999	Inch
3200	240755	99999	BIGFORK 12 S	198008	1399	HI	-99999	M			-99999	Inch
3200	240755	99999	BIGFORK 12 S	198008	1499	HI	-99999	M			-99999	Inch
3200	240755	99999	BIGFORK 12 S	198008	1599	HI	-99999	M			-99999	Inch
3200	240755	99999	BIGFORK 12 S	198008	1699	HI	-99999	M			-99999	Inch
3200	240755	99999	BIGFORK 12 S	198008	1799	HI	-99999	M			-99999	Inch
3200	240755	99999	BIGFORK 12 S	198008	1818	HI	164	A	1		1.64	Inch
3200	240755	99999	BIGFORK 12 S	198008	1918	HI	28		1		0.28	Inch
3200	240755	99999	BIGFORK 12 S	198008	2018	HI	0	T	1		0	Inch
3200	240755	99999	BIGFORK 12 S	198008	2118	HI	0		1		0	Inch
3200	240755	99999	BIGFORK 12 S	198008	2218	HI	0		1		0	Inch
3200	240755	99999	BIGFORK 12 S	198008	2318	HI	0		1		0	Inch
3200	240755	99999	BIGFORK 12 S	198008	2418	HI	0		1		0	Inch
3200	240755	99999	BIGFORK 12 S	198008	2518	HI	0		1		0	Inch
3200	240755	99999	BIGFORK 12 S	198008	2618	HI	0		1		0	Inch
3200	240755	99999	BIGFORK 12 S	198008	2718	HI	0		1		0	Inch
3200	240755	99999	BIGFORK 12 S	198008	2818	HI	0		1		0	Inch
3200	240755	99999	BIGFORK 12 S	198008	2918	HI	0		1		0	Inch
3200	240755	99999	BIGFORK 12 S	198008	3018	HI	0		1		0	Inch
3200	240755	99999	BIGFORK 12 S	198008	3118	HI	21		1		0.21	Inch
3200	240755	99999	BIGFORK 12 S	198009	118	HI	0		1		0	Inch
3200	240755	99999	BIGFORK 12 S	198009	218	HI	0	T	1		0	Inch
3200	240755	99999	BIGFORK 12 S	198009	318	HI	12		1		0.12	Inch
3200	240755	99999	BIGFORK 12 S	198009	418	HI	0		1		0	Inch
3200	240755	99999	BIGFORK 12 S	198009	518	HI	0		1		0	Inch
3200	240755	99999	BIGFORK 12 S	198009	618	HI	0		1		0	Inch
3200	240755	99999	BIGFORK 12 S	198009	718	HI	0		1		0	Inch
3200	240755	99999	BIGFORK 12 S	198009	818	HI	0		1		0	Inch
3200	240755	99999	BIGFORK 12 S	198009	918	HI	0		1		0	Inch
3200	240755	99999	BIGFORK 12 S	198009	1018	HI	0		1		0	Inch
3200	240755	99999	BIGFORK 12 S	198009	1118	HI	0		1		0	Inch
3200	240755	99999	BIGFORK 12 S	198009	1218	HI	0		1		0	Inch
3200	240755	99999	BIGFORK 12 S	198009	1318	HI	0		1		0	Inch
3200	240755	99999	BIGFORK 12 S	198009	1418	HI	0		1		0	Inch
3200	240755	99999	BIGFORK 12 S	198009	1518	HI	13		1		0.13	Inch
3200	240755	99999	BIGFORK 12 S	198009	1618	HI	10		1		0.1	Inch
3200	240755	99999	BIGFORK 12 S	198009	1718	HI	2		1		0.02	Inch
3200	240755	99999	BIGFORK 12 S	198009	1818	HI	0		1		0	Inch
3200	240755	99999	BIGFORK 12 S	198009	1918	HI	7		1		0.07	Inch
3200	240755	99999	BIGFORK 12 S	198009	2018	HI	35		1		0.35	Inch
3200	240755	99999	BIGFORK 12 S	198009	2118	HI	10		1		0.1	Inch
3200	240755	99999	BIGFORK 12 S	198009	2218	HI	9		1		0.09	Inch
3200	240755	99999	BIGFORK 12 S	198009	2318	HI	1		1		0.01	Inch
3200	240755	99999	BIGFORK 12 S	198009	2418	HI	0		1		0	Inch
3200	240755	99999	BIGFORK 12 S	198009	2518	HI	0		1		0	Inch
3200	240755	99999	BIGFORK 12 S	198009	2618	HI	0		1		0	Inch
3200	240755	99999	BIGFORK 12 S	198009	2718	HI	0		1		0	Inch
3200	240755	99999	BIGFORK 12 S	198009	2818	HI	16		1		0.16	Inch
3200	240755	99999	BIGFORK 12 S	198009	2918	HI	0		1		0	Inch
3200	240755	99999	BIGFORK 12 S	198009	3018	HI	0		1		0	Inch
3200	240755	99999	BIGFORK 12 S	198010	118	HI	0		1		0	Inch
3200	240755	99999	BIGFORK 12 S	198010	218	HI	0		1		0	Inch
3200	240755	99999	BIGFORK 12 S	198010	318	HI	0		1		0	Inch
3200	240755	99999	BIGFORK 12 S	198010	418	HI	0		1		0	Inch
3200	240755	99999	BIGFORK 12 S	198010	518	HI	0		1		0	Inch
3200	240755	99999	BIGFORK 12 S	198010	618	HI	0		1		0	Inch
3200	240755	99999	BIGFORK 12 S	198010	718	HI	0		1		0	Inch
3200	240755	99999	BIGFORK 12 S	198010	818	HI	0		1		0	Inch
3200	240755	99999	BIGFORK 12 S	198010	918	HI	0		1		0	Inch
3200	240755	99999	BIGFORK 12 S	198010	1018	HI	0		1		0	Inch
3200	240755	99999	BIGFORK 12 S	198010	1118	HI	0		1		0	Inch
3200	240755	99999	BIGFORK 12 S	198010	1218	HI	0		1		0	Inch
3200	240755	99999	BIGFORK 12 S	198010	1318	HI	62		1		0.62	Inch
3200	240755	99999	BIGFORK 12 S	198010	1418	HI	0		1		0	Inch
3200	240755	99999	BIGFORK 12 S	198010	1518	HI	4		1		0.04	Inch
3200	240755	99999	BIGFORK 12 S	198010	1618	HI	0		1		0	Inch
3200	240755	99999	BIGFORK 12 S	198010	1718	HI	0		1		0	Inch
3200	240755	99999	BIGFORK 12 S	198010	1818	HI	0		1		0	Inch
3200	240755	99999	BIGFORK 12 S	198010	1918	HI	0		1		0	Inch
3200	240755	99999	BIGFORK 12 S	198010	2018	HI	0		1		0	Inch
3200	240755	99999	BIGFORK 12 S	198010	2118	HI	14		1		0.14	Inch
3200	240755	99999	BIGFORK 12 S	198010	2218	HI	99999	S	1		99999	Inch
3200	240755	99999	BIGFORK 12 S	198010	2399	HI	-99999	M			-99999	Inch
3200	240755	99999	BIGFORK 12 S	198010	2499	HI	-99999	M			-99999	Inch
3200	240755	99999	BIGFORK 12 S	198010	2599	HI	-99999	M			-99999	Inch
3200	240755	99999	BIGFORK 12 S	198010	2618	HI	41	A	1		0.41	Inch
3200	240755	99999	BIGFORK 12 S	198010	2718	HI	0		1		0	Inch
3200	240755	99999	BIGFORK 12 S	198010	2818	HI	0		1		0	Inch
3200	240755	99999	BIGFORK 12 S	198010	2918	HI	0		1		0	Inch
3200	240755	99999	BIGFORK 12 S	198010	3018	HI	0		1		0	Inch
3200	240755	99999	BIGFORK 12 S	198010	3118	HI	0		1		0	Inch
3200	240755	99999	BIGFORK 12 S	198011	118	HI	0		1		0	Inch
3200	240755	99999	BIGFORK 12 S	198011	218	HI	0		1		0	Inch
3200	240755	99999	BIGFORK 12 S	198011	318	HI	0		1		0	Inch
3200	240755	99999	BIGFORK 12 S	198011	418	HI	0		1		0	Inch
3200	240755	99999	BIGFORK 12 S	198011	518	HI	0		1		0	Inch
3200	240755	99999	BIGFORK 12 S	198011	618	HI	0		1		0	Inch
3200	240755	99999	BIGFORK 12 S	198011	718	HI	99999	S	1		99999	Inch
3200	240755	99999	BIGFORK 12 S	198011	818	HI	45	A	1		0.45	Inch
3200	240755	99999	BIGFORK 12 S	198011	918	HI	0		1		0	Inch
3200	240755	99999	BIGFORK 12 S	198011	1018	HI	0		1		0	Inch
3200	240755	99999	BIGFORK 12 S	198011	1118	HI	1		1		0.01	Inch
3200	240755	99999	BIGFORK 12 S	198011	1218	HI	0	T	1		0	Inch
3200	240755	99999	BIGFORK 12 S	198011	1318	HI	0		1		0	Inch
3200	240755	99999	BIGFORK 12 S	198011	1418	HI	0		1		0	Inch
3200	240755	99999	BIGFORK 12 S	198011	1518	HI	0		1		0	Inch
3200	240755	99999	BIGFORK 12 S	198011	1618	HI	0		1		0	Inch
3200	240755	99999	BIGFORK 12 S	198011	1718	HI	0		1		0	Inch
3200	240755	99999	BIGFORK 12 S	198011	1818	HI	0		1		0	Inch
3200	240755	99999	BIGFORK 12 S	198011	1918	HI	0	T	1		0	Inch
3200	240755	99999	BIGFORK 12 S	198011	2018	HI	0		1		0	Inch
3200	240755	99999	BIGFORK 12 S	198011	2118	HI	0	T	1		0	Inch
3200	240755	99999	BIGFORK 12 S	198011	2218	HI	0	T	1		0	Inch
3200	240755	99999	BIGFORK 12 S	198011	2318	HI	1		1		0.01	Inch
3200	240755	99999	BIGFORK 12 S	198011	2418	HI	0	T	1		0	Inch
3200	240755	99999	BIGFORK 12 S	198011	2518	HI	0	T	1		0	Inch
3200	240755	99999	BIGFORK 12 S	198011	2618	HI	0		1		0	Inch
3200	240755	99999	BIGFORK 12 S	198011	2718	HI	0		1		0	Inch
3200	240755	99999	BIGFORK 12 S	198011	2818	HI	0	T	1		0	Inch
3200	240755	99999	BIGFORK 12 S	198011	2918	HI	1		1		0.01	Inch
3200	240755	99999	BIGFORK 12 S	198011	3018	HI	0	T	1		0	Inch
3200	240755	99999	BIGFORK 12 S	198012	118	HI	0	T	1		0	Inch
3200	240755	99999	BIGFORK 12 S	198012	218	HI	31		1		0.31	Inch
3200	240755	99999	BIGFORK 12 S	198012	318	HI	20		1		0.2	Inch
3200	240755	99999	BIGFORK 12 S	198012	418	HI	0		1		0	Inch
3200	240755	99999	BIGFORK 12 S	198012	518	HI	99999	S	1		99999	Inch
3200	240755	99999	BIGFORK 12 S	198012	699	HI	-99999	M			-99999	Inch
3200	240755	99999	BIGFORK 12 S	198012	718	HI	22	A	1		0.22	Inch
3200	240755	99999	BIGFORK 12 S	198012	818	HI	0		1		0	Inch
3200	240755	99999	BIGFORK 12 S	198012	918	HI	4		1		0.04	Inch
3200	240755	99999	BIGFORK 12 S	198012	1018	HI	0		1		0	Inch
3200	240755	99999	BIGFORK 12 S	198012	1118	HI	0		1		0	Inch
3200	240755	99999	BIGFORK 12 S	198012	1218	HI	0		1		0	Inch
3200	240755	99999	BIGFORK 12 S	198012	1318	HI	0		1		0	Inch
3200	240755	99999	BIGFORK 12 S	198012	1418	HI	4		1		0.04	Inch
3200	240755	99999	BIGFORK 12 S	198012	1518	HI	0		1		0	Inch
3200	240755	99999	BIGFORK 12 S	198012	1618	HI	0		1		0	Inch
3200	240755	99999	BIGFORK 12 S	198012	1718	HI	0		1		0	Inch
3200	240755	99999	BIGFORK 12 S	198012	1818	HI	0		1		0	Inch
3200	240755	99999	BIGFORK 12 S	198012	1918	HI	0		1		0	Inch
3200	240755	99999	BIGFORK 12 S	198012	2018	HI	16		1		0.16	Inch
3200	240755	99999	BIGFORK 12 S	198012	2118	HI	55		1		0.55	Inch
3200	240755	99999	BIGFORK 12 S	198012	2218	HI	23		1		0.23	Inch
3200	240755	99999	BIGFORK 12 S	198012	2318	HI	0		1		0	Inch
3200	240755	99999	BIGFORK 12 S	198012	2418	HI	12		1		0.12	Inch
3200	240755	99999	BIGFORK 12 S	198012	2518	HI	20		1		0.2	Inch
3200	240755	99999	BIGFORK 12 S	198012	2618	HI	6		1		0.06	Inch
3200	240755	99999	BIGFORK 12 S	198012	2718	HI	0	T	1		0	Inch
3200	240755	99999	BIGFORK 12 S	198012	2818	HI	0		1		0	Inch
3200	240755	99999	BIGFORK 12 S	198012	2918	HI	0		1		0	Inch
3200	240755	99999	BIGFORK 12 S	198012	3018	HI	44		1		0.44	Inch
3200	240755	99999	BIGFORK 12 S	198012	3118	HI	14		1		0.14	Inch
3200	240755	99999	BIGFORK 12 S	198101	118	HI	0		1		0	Inch
3200	240755	99999	BIGFORK 12 S	198101	218	HI	0	T	1		0	Inch
3200	240755	99999	BIGFORK 12 S	198101	318	HI	0		1		0	Inch
3200	240755	99999	BIGFORK 12 S	198101	418	HI	2		1		0.02	Inch
3200	240755	99999	BIGFORK 12 S	198101	518	HI	2		1		0.02	Inch
3200	240755	99999	BIGFORK 12 S	198101	618	HI	0		1		0	Inch
3200	240755	99999	BIGFORK 12 S	198101	718	HI	0		1		0	Inch
3200	240755	99999	BIGFORK 12 S	198101	818	HI	0		1		0	Inch
3200	240755	99999	BIGFORK 12 S	198101	918	HI	0		1		0	Inch
3200	240755	99999	BIGFORK 12 S	198101	1018	HI	0		1		0	Inch
3200	240755	99999	BIGFORK 12 S	198101	1118	HI	0		1		0	Inch
3200	240755	99999	BIGFORK 12 S	198101	1218	HI	0		1		0	Inch
3200	240755	99999	BIGFORK 12 S	198101	1318	HI	0		1		0	Inch
3200	240755	99999	BIGFORK 12 S	198101	1418	HI	0		1		0	Inch
3200	240755	99999	BIGFORK 12 S	198101	1518	HI	0		1		0	Inch
3200	240755	99999	BIGFORK 12 S	198101	1618	HI	0		1		0	Inch
3200	240755	99999	BIGFORK 12 S	198101	1718	HI	0		1		0	Inch
3200	240755	99999	BIGFORK 12 S	198101	1818	HI	18		1		0.18	Inch
3200	240755	99999	BIGFORK 12 S	198101	1918	HI	0		1		0	Inch
3200	240755	99999	BIGFORK 12 S	198101	2018	HI	0		1		0	Inch
3200	240755	99999	BIGFORK 12 S	198101	2118	HI	0		1		0	Inch
3200	240755	99999	BIGFORK 12 S	198101	2218	HI	0		1		0	Inch
3200	240755	99999	BIGFORK 12 S	198101	2318	HI	6		1		0.06	Inch
3200	240755	99999	BIGFORK 12 S	198101	2418	HI	124		1		1.24	Inch
3200	240755	99999	BIGFORK 12 S	198101	2518	HI	29		1		0.29	Inch
3200	240755	99999	BIGFORK 12 S	198101	2618	HI	0		1		0	Inch
3200	240755	99999	BIGFORK 12 S	198101	2718	HI	6		1		0.06	Inch
3200	240755	99999	BIGFORK 12 S	198101	2818	HI	3		1		0.03	Inch
3200	240755	99999	BIGFORK 12 S	198101	2918	HI	0		1		0	Inch
3200	240755	99999	BIGFORK 12 S	198101	3018	HI	0		1		0	Inch
3200	240755	99999	BIGFORK 12 S	198101	3118	HI	10		1		0.1	Inch
3200	240755	99999	BIGFORK 12 S	198102	118	HI	0		1		0	Inch
3200	240755	99999	BIGFORK 12 S	198102	218	HI	0		1		0	Inch
3200	240755	99999	BIGFORK 12 S	198102	318	HI	0		1		0	Inch
3200	240755	99999	BIGFORK 12 S	198102	418	HI	0		1		0	Inch
3200	240755	99999	BIGFORK 12 S	198102	518	HI	0		1		0	Inch
3200	240755	99999	BIGFORK 12 S	198102	618	HI	3		1		0.03	Inch
3200	240755	99999	BIGFORK 12 S	198102	718	HI	3		1		0.03	Inch
3200	240755	99999	BIGFORK 12 S	198102	818	HI	3		1		0.03	Inch
3200	240755	99999	BIGFORK 12 S	198102	918	HI	8		1		0.08	Inch
3200	240755	99999	BIGFORK 12 S	198102	1018	HI	0	T	1		0	Inch
3200	240755	99999	BIGFORK 12 S	198102	1118	HI	0	T	1		0	Inch
3200	240755	99999	BIGFORK 12 S	198102	1218	HI	0		1		0	Inch
3200	240755	99999	BIGFORK 12 S	198102	1318	HI	35		1		0.35	Inch
3200	240755	99999	BIGFORK 12 S	198102	1418	HI	44		1		0.44	Inch
3200	240755	99999	BIGFORK 12 S	198102	1518	HI	0	T	1		0	Inch
3200	240755	99999	BIGFORK 12 S	198102	1618	HI	47		1		0.47	Inch
3200	240755	99999	BIGFORK 12 S	198102	1718	HI	0	T	1		0	Inch
3200	240755	99999	BIGFORK 12 S	198102	1818	HI	4		1		0.04	Inch
3200	240755	99999	BIGFORK 12 S	198102	1918	HI	3		1		0.03	Inch
3200	240755	99999	BIGFORK 12 S	198102	2018	HI	0		1		0	Inch
3200	240755	99999	BIGFORK 12 S	198102	2118	HI	0		1		0	Inch
3200	240755	99999	BIGFORK 12 S	198102	2218	HI	0		1		0	Inch
3200	240755	99999	BIGFORK 12 S	198102	2318	HI	0		1		0	Inch
3200	240755	99999	BIGFORK 12 S	198102	2418	HI	0		1		0	Inch
3200	240755	99999	BIGFORK 12 S	198102	2518	HI	5		1		0.05	Inch
3200	240755	99999	BIGFORK 12 S	198102	2618	HI	8		1		0.08	Inch
3200	240755	99999	BIGFORK 12 S	198102	2718	HI	0	T	1		0	Inch
3200	240755	99999	BIGFORK 12 S	198102	2818	HI	0		1		0	Inch
3200	240755	99999	BIGFORK 12 S	198103	118	HI	0		1		0	Inch
3200	240755	99999	BIGFORK 12 S	198103	218	HI	0		1		0	Inch
3200	240755	99999	BIGFORK 12 S	198103	318	HI	0		1		0	Inch
3200	240755	99999	BIGFORK 12 S	198103	418	HI	0		1		0	Inch
3200	240755	99999	BIGFORK 12 S	198103	518	HI	24		1		0.24	Inch
3200	240755	99999	BIGFORK 12 S	198103	618	HI	0	T	1		0	Inch
3200	240755	99999	BIGFORK 12 S	198103	718	HI	0		1		0	Inch
3200	240755	99999	BIGFORK 12 S	198103	818	HI	0		1		0	Inch
3200	240755	99999	BIGFORK 12 S	198103	918	HI	0		1		0	Inch
3200	240755	99999	BIGFORK 12 S	198103	1018	HI	0		1		0	Inch
3200	240755	99999	BIGFORK 12 S	198103	1118	HI	0		1		0	Inch
3200	240755	99999	BIGFORK 12 S	198103	1218	HI	0		1		0	Inch
3200	240755	99999	BIGFORK 12 S	198103	1318	HI	0		1		0	Inch
3200	240755	99999	BIGFORK 12 S	198103	1418	HI	0		1		0	Inch
3200	240755	99999	BIGFORK 12 S	198103	1518	HI	0		1		0	Inch
3200	240755	99999	BIGFORK 12 S	198103	1618	HI	11		1		0.11	Inch
3200	240755	99999	BIGFORK 12 S	198103	1718	HI	82		1		0.82	Inch
3200	240755	99999	BIGFORK 12 S	198103	1818	HI	3		1		0.03	Inch
3200	240755	99999	BIGFORK 12 S	198103	1918	HI	0		1		0	Inch
3200	240755	99999	BIGFORK 12 S	198103	2018	HI	0		1		0	Inch
3200	240755	99999	BIGFORK 12 S	198103	2118	HI	0		1		0	Inch
3200	240755	99999	BIGFORK 12 S	198103	2218	HI	0		1		0	Inch
3200	240755	99999	BIGFORK 12 S	198103	2318	HI	6		1		0.06	Inch
3200	240755	99999	BIGFORK 12 S	198103	2418	HI	0		1		0	Inch
3200	240755	99999	BIGFORK 12 S	198103	2518	HI	0		1		0	Inch
3200	240755	99999	BIGFORK 12 S	198103	2618	HI	27		1		0.27	Inch
3200	240755	99999	BIGFORK 12 S	198103	2718	HI	0		1		0	Inch
3200	240755	99999	BIGFORK 12 S	198103	2818	HI	0		1		0	Inch
3200	240755	99999	BIGFORK 12 S	198103	2918	HI	17		1		0.17	Inch
3200	240755	99999	BIGFORK 12 S	198103	3018	HI	130		1		1.3	Inch
3200	240755	99999	BIGFORK 12 S	198103	3118	HI	1		1		0.01	Inch
3200	240755	99999	BIGFORK 12 S	198104	118	HI	0		1		0	Inch
3200	240755	99999	BIGFORK 12 S	198104	218	HI	29		1		0.29	Inch
3200	240755	99999	BIGFORK 12 S	198104	318	HI	0		1		0	Inch
3200	240755	99999	BIGFORK 12 S	198104	418	HI	0		1		0	Inch
3200	240755	99999	BIGFORK 12 S	198104	518	HI	17		1		0.17	Inch
3200	240755	99999	BIGFORK 12 S	198104	618	HI	0		1		0	Inch
3200	240755	99999	BIGFORK 12 S	198104	718	HI	3		1		0.03	Inch
3200	240755	99999	BIGFORK 12 S	198104	818	HI	2		1		0.02	Inch
3200	240755	99999	BIGFORK 12 S	198104	918	HI	1		1		0.01	Inch
3200	240755	99999	BIGFORK 12 S	198104	1018	HI	0		1		0	Inch
3200	240755	99999	BIGFORK 12 S	198104	1118	HI	0		1		0	Inch
3200	240755	99999	BIGFORK 12 S	198104	1218	HI	0		1		0	Inch
3200	240755	99999	BIGFORK 12 S	198104	1318	HI	6		1		0.06	Inch
3200	240755	99999	BIGFORK 12 S	198104	1418	HI	0		1		0	Inch
3200	240755	99999	BIGFORK 12 S	198104	1518	HI	0		1		0	Inch
3200	240755	99999	BIGFORK 12 S	198104	1618	HI	0		1		0	Inch
3200	240755	99999	BIGFORK 12 S	198104	1718	HI	0		1		0	Inch
3200	240755	99999	BIGFORK 12 S	198104	1818	HI	0		1		0	Inch
3200	240755	99999	BIGFORK 12 S	198104	1918	HI	0		1		0	Inch
3200	240755	99999	BIGFORK 12 S	198104	2018	HI	0		1		0	Inch
3200	240755	99999	BIGFORK 12 S	198104	2118	HI	12		1		0.12	Inch
3200	240755	99999	BIGFORK 12 S	198104	2218	HI	5		1		0.05	Inch
3200	240755	99999	BIGFORK 12 S	198104	2318	HI	0		1		0	Inch
3200	240755	99999	BIGFORK 12 S	198104	2418	HI	42		1		0.42	Inch
3200	240755	99999	BIGFORK 12 S	198104	2518	HI	0	T	1		0	Inch
3200	240755	99999	BIGFORK 12 S	198104	2618	HI	0		1		0	Inch
3200	240755	99999	BIGFORK 12 S	198104	2718	HI	0		1		0	Inch
3200	240755	99999	BIGFORK 12 S	198104	2818	HI	22		1		0.22	Inch
3200	240755	99999	BIGFORK 12 S	198104	2918	HI	31		1		0.31	Inch
3200	240755	99999	BIGFORK 12 S	198104	3018	HI	2		1		0.02	Inch
3200	240755	99999	BIGFORK 12 S	198105	118	HI	0		1		0	Inch
3200	240755	99999	BIGFORK 12 S	198105	218	HI	7		1		0.07	Inch
3200	240755	99999	BIGFORK 12 S	198105	318	HI	0		1		0	Inch
3200	240755	99999	BIGFORK 12 S	198105	418	HI	21		1		0.21	Inch
3200	240755	99999	BIGFORK 12 S	198105	518	HI	17		1		0.17	Inch
3200	240755	99999	BIGFORK 12 S	198105	618	HI	25		1		0.25	Inch
3200	240755	99999	BIGFORK 12 S	198105	718	HI	0	T	1		0	Inch
3200	240755	99999	BIGFORK 12 S	198105	818	HI	10		1		0.1	Inch
3200	240755	99999	BIGFORK 12 S	198105	918	HI	0	T	1		0	Inch
3200	240755	99999	BIGFORK 12 S	198105	1018	HI	24		1		0.24	Inch
3200	240755	99999	BIGFORK 12 S	198105	1118	HI	1		1		0.01	Inch
3200	240755	99999	BIGFORK 12 S	198105	1218	HI	0		1		0	Inch
3200	240755	99999	BIGFORK 12 S	198105	1318	HI	0		1		0	Inch
3200	240755	99999	BIGFORK 12 S	198105	1418	HI	0		1		0	Inch
3200	240755	99999	BIGFORK 12 S	198105	1518	HI	0		1		0	Inch
3200	240755	99999	BIGFORK 12 S	198105	1618	HI	110		1		1.1	Inch
3200	240755	99999	BIGFORK 12 S	198105	1718	HI	0		1		0	Inch
3200	240755	99999	BIGFORK 12 S	198105	1818	HI	4		1		0.04	Inch
3200	240755	99999	BIGFORK 12 S	198105	1918	HI	5		1		0.05	Inch
3200	240755	99999	BIGFORK 12 S	198105	2018	HI	39		1		0.39	Inch
3200	240755	99999	BIGFORK 12 S	198105	2118	HI	23		1		0.23	Inch
3200	240755	99999	BIGFORK 12 S	198105	2218	HI	84		1		0.84	Inch
3200	240755	99999	BIGFORK 12 S	198105	2318	HI	0		1		0	Inch
3200	240755	99999	BIGFORK 12 S	198105	2418	HI	7		1		0.07	Inch
3200	240755	99999	BIGFORK 12 S	198105	2518	HI	0		1		0	Inch
3200	240755	99999	BIGFORK 12 S	198105	2618	HI	22		1		0.22	Inch
3200	240755	99999	BIGFORK 12 S	198105	2718	HI	0	T	1		0	Inch
3200	240755	99999	BIGFORK 12 S	198105	2818	HI	0		1		0	Inch
3200	240755	99999	BIGFORK 12 S	198105	2918	HI	0		1		0	Inch
3200	240755	99999	BIGFORK 12 S	198105	3018	HI	0		1		0	Inch
3200	240755	99999	BIGFORK 12 S	198105	3118	HI	26		1		0.26	Inch
3200	240755	99999	BIGFORK 12 S	198106	118	HI	26		1		0.26	Inch
3200	240755	99999	BIGFORK 12 S	198106	218	HI	0	T	1		0	Inch
3200	240755	99999	BIGFORK 12 S	198106	318	HI	26		1		0.26	Inch
3200	240755	99999	BIGFORK 12 S	198106	418	HI	1		1		0.01	Inch
3200	240755	99999	BIGFORK 12 S	198106	518	HI	99999	S	1		99999	Inch
3200	240755	99999	BIGFORK 12 S	198106	618	HI	83	A	1		0.83	Inch
3200	240755	99999	BIGFORK 12 S	198106	718	HI	7		1		0.07	Inch
3200	240755	99999	BIGFORK 12 S	198106	818	HI	11		1		0.11	Inch
3200	240755	99999	BIGFORK 12 S	198106	918	HI	7		1		0.07	Inch
3200	240755	99999	BIGFORK 12 S	198106	1018	HI	7		1		0.07	Inch
3200	240755	99999	BIGFORK 12 S	198106	1118	HI	11		1		0.11	Inch
3200	240755	99999	BIGFORK 12 S	198106	1218	HI	17		1		0.17	Inch
3200	240755	99999	BIGFORK 12 S	198106	1318	HI	33		1		0.33	Inch
3200	240755	99999	BIGFORK 12 S	198106	1418	HI	41		1		0.41	Inch
3200	240755	99999	BIGFORK 12 S	198106	1518	HI	15		1		0.15	Inch
3200	240755	99999	BIGFORK 12 S	198106	1618	HI	2		1		0.02	Inch
3200	240755	99999	BIGFORK 12 S	198106	1718	HI	10		1		0.1	Inch
3200	240755	99999	BIGFORK 12 S	198106	1818	HI	1		1		0.01	Inch
3200	240755	99999	BIGFORK 12 S	198106	1918	HI	48		1		0.48	Inch
3200	240755	99999	BIGFORK 12 S	198106	2018	HI	88		1		0.88	Inch
3200	240755	99999	BIGFORK 12 S	198106	2118	HI	6		1		0.06	Inch
3200	240755	99999	BIGFORK 12 S	198106	2218	HI	13		1		0.13	Inch
3200	240755	99999	BIGFORK 12 S	198106	2318	HI	8		1		0.08	Inch
3200	240755	99999	BIGFORK 12 S	198106	2418	HI	0	T	1		0	Inch
3200	240755	99999	BIGFORK 12 S	198106	2518	HI	0		1		0	Inch
3200	240755	99999	BIGFORK 12 S	198106	2618	HI	0		1		0	Inch
3200	240755	99999	BIGFORK 12 S	198106	2718	HI	0		1		0	Inch
3200	240755	99999	BIGFORK 12 S	198106	2818	HI	2		1		0.02	Inch
3200	240755	99999	BIGFORK 12 S	198106	2918	HI	0		1		0	Inch
3200	240755	99999	BIGFORK 12 S	198106	3018	HI	0		1		0	Inch
3200	240755	99999	BIGFORK 12 S	198107	118	HI	5		1		0.05	Inch
3200	240755	99999	BIGFORK 12 S	198107	218	HI	0		1		0	Inch
3200	240755	99999	BIGFORK 12 S	198107	318	HI	0		1		0	Inch
3200	240755	99999	BIGFORK 12 S	198107	418	HI	0		1		0	Inch
3200	240755	99999	BIGFORK 12 S	198107	518	HI	0		1		0	Inch
3200	240755	99999	BIGFORK 12 S	198107	618	HI	4		1		0.04	Inch
3200	240755	99999	BIGFORK 12 S	198107	718	HI	43		1		0.43	Inch
3200	240755	99999	BIGFORK 12 S	198107	818	HI	1		1		0.01	Inch
3200	240755	99999	BIGFORK 12 S	198107	918	HI	0		1		0	Inch
3200	240755	99999	BIGFORK 12 S	198107	1018	HI	0		1		0	Inch
3200	240755	99999	BIGFORK 12 S	198107	1118	HI	0		1		0	Inch
3200	240755	99999	BIGFORK 12 S	198107	1218	HI	1		1		0.01	Inch
3200	240755	99999	BIGFORK 12 S	198107	1318	HI	0		1		0	Inch
3200	240755	99999	BIGFORK 12 S	198107	1418	HI	0		1		0	Inch
3200	240755	99999	BIGFORK 12 S	198107	1518	HI	0		1		0	Inch
3200	240755	99999	BIGFORK 12 S	198107	1618	HI	0		1		0	Inch
3200	240755	99999	BIGFORK 12 S	198107	1718	HI	0		1		0	Inch
3200	240755	99999	BIGFORK 12 S	198107	1818	HI	0		1		0	Inch
3200	240755	99999	BIGFORK 12 S	198107	1918	HI	5		1		0.05	Inch
3200	240755	99999	BIGFORK 12 S	198107	2018	HI	11		1		0.11	Inch
3200	240755	99999	BIGFORK 12 S	198107	2118	HI	0	T	1		0	Inch
3200	240755	99999	BIGFORK 12 S	198107	2218	HI	0		1		0	Inch
3200	240755	99999	BIGFORK 12 S	198107	2318	HI	0		1		0	Inch
3200	240755	99999	BIGFORK 12 S	198107	2418	HI	0		1		0	Inch
3200	240755	99999	BIGFORK 12 S	198107	2518	HI	0		1		0	Inch
3200	240755	99999	BIGFORK 12 S	198107	2618	HI	0		1		0	Inch
3200	240755	99999	BIGFORK 12 S	198107	2718	HI	0		1		0	Inch
3200	240755	99999	BIGFORK 12 S	198107	2818	HI	0	T	1		0	Inch
3200	240755	99999	BIGFORK 12 S	198107	2918	HI	0		1		0	Inch
3200	240755	99999	BIGFORK 12 S	198107	3018	HI	0		1		0	Inch
3200	240755	99999	BIGFORK 12 S	198107	3118	HI	0		1		0	Inch
3200	240755	99999	BIGFORK 12 S	198108	118	HI	0		1		0	Inch
3200	240755	99999	BIGFORK 12 S	198108	218	HI	0	T	1		0	Inch
3200	240755	99999	BIGFORK 12 S	198108	318	HI	0		1		0	Inch
3200	240755	99999	BIGFORK 12 S	198108	418	HI	0		1		0	Inch
3200	240755	99999	BIGFORK 12 S	198108	518	HI	0		1		0	Inch
3200	240755	99999	BIGFORK 12 S	198108	618	HI	0		1		0	Inch
3200	240755	99999	BIGFORK 12 S	198108	718	HI	0		1		0	Inch
3200	240755	99999	BIGFORK 12 S	198108	818	HI	0		1		0	Inch
3200	240755	99999	BIGFORK 12 S	198108	918	HI	0		1		0	Inch
3200	240755	99999	BIGFORK 12 S	198108	1018	HI	0		1		0	Inch
3200	240755	99999	BIGFORK 12 S	198108	1118	HI	0		1		0	Inch
3200	240755	99999	BIGFORK 12 S	198108	1218	HI	0		1		0	Inch
3200	240755	99999	BIGFORK 12 S	198108	1318	HI	0		1		0	Inch
3200	240755	99999	BIGFORK 12 S	198108	1418	HI	0		1		0	Inch
3200	240755	99999	BIGFORK 12 S	198108	1518	HI	5		1		0.05	Inch
3200	240755	99999	BIGFORK 12 S	198108	1618	HI	0		1		0	Inch
3200	240755	99999	BIGFORK 12 S	198108	1718	HI	0	T	1		0	Inch
3200	240755	99999	BIGFORK 12 S	198108	1818	HI	0	T	1		0	Inch
3200	240755	99999	BIGFORK 12 S	198108	1918	HI	0		1		0	Inch
3200	240755	99999	BIGFORK 12 S	198108	2018	HI	0		1		0	Inch
3200	240755	99999	BIGFORK 12 S	198108	2118	HI	0		1		0	Inch
3200	240755	99999	BIGFORK 12 S	198108	2218	HI	0		1		0	Inch
3200	240755	99999	BIGFORK 12 S	198108	2318	HI	0		1		0	Inch
3200	240755	99999	BIGFORK 12 S	198108	2418	HI	0		1		0	Inch
3200	240755	99999	BIGFORK 12 S	198108	2518	HI	0		1		0	Inch
3200	240755	99999	BIGFORK 12 S	198108	2618	HI	0		1		0	Inch
3200	240755	99999	BIGFORK 12 S	198108	2718	HI	0		1		0	Inch
3200	240755	99999	BIGFORK 12 S	198108	2818	HI	0		1		0	Inch
3200	240755	99999	BIGFORK 12 S	198108	2918	HI	0		1		0	Inch
3200	240755	99999	BIGFORK 12 S	198108	3018	HI	48		1		0.48	Inch
3200	240755	99999	BIGFORK 12 S	198108	3118	HI	12		1		0.12	Inch
3200	240755	99999	BIGFORK 12 S	198109	118	HI	2		1		0.02	Inch
3200	240755	99999	BIGFORK 12 S	198109	218	HI	0	T	1		0	Inch
3200	240755	99999	BIGFORK 12 S	198109	318	HI	0		1		0	Inch
3200	240755	99999	BIGFORK 12 S	198109	418	HI	0		1		0	Inch
3200	240755	99999	BIGFORK 12 S	198109	518	HI	0		1		0	Inch
3200	240755	99999	BIGFORK 12 S	198109	618	HI	0		1		0	Inch
3200	240755	99999	BIGFORK 12 S	198109	718	HI	0		1		0	Inch
3200	240755	99999	BIGFORK 12 S	198109	818	HI	0		1		0	Inch
3200	240755	99999	BIGFORK 12 S	198109	918	HI	0		1		0	Inch
3200	240755	99999	BIGFORK 12 S	198109	1018	HI	0		1		0	Inch
3200	240755	99999	BIGFORK 12 S	198109	1118	HI	0		1		0	Inch
3200	240755	99999	BIGFORK 12 S	198109	1218	HI	0		1		0	Inch
3200	240755	99999	BIGFORK 12 S	198109	1318	HI	0		1		0	Inch
3200	240755	99999	BIGFORK 12 S	198109	1418	HI	0		1		0	Inch
3200	240755	99999	BIGFORK 12 S	198109	1518	HI	0		1		0	Inch
3200	240755	99999	BIGFORK 12 S	198109	1618	HI	0		1		0	Inch
3200	240755	99999	BIGFORK 12 S	198109	1718	HI	0		1		0	Inch
3200	240755	99999	BIGFORK 12 S	198109	1818	HI	0		1		0	Inch
3200	240755	99999	BIGFORK 12 S	198109	1918	HI	0		1		0	Inch
3200	240755	99999	BIGFORK 12 S	198109	2018	HI	0	T	1		0	Inch
3200	240755	99999	BIGFORK 12 S	198109	2118	HI	3		1		0.03	Inch
3200	240755	99999	BIGFORK 12 S	198109	2218	HI	3		1		0.03	Inch
3200	240755	99999	BIGFORK 12 S	198109	2318	HI	0	T	1		0	Inch
3200	240755	99999	BIGFORK 12 S	198109	2418	HI	0		1		0	Inch
3200	240755	99999	BIGFORK 12 S	198109	2518	HI	3		1		0.03	Inch
3200	240755	99999	BIGFORK 12 S	198109	2618	HI	0		1		0	Inch
3200	240755	99999	BIGFORK 12 S	198109	2718	HI	36		1		0.36	Inch
3200	240755	99999	BIGFORK 12 S	198109	2818	HI	17		1		0.17	Inch
3200	240755	99999	BIGFORK 12 S	198109	2918	HI	10		1		0.1	Inch
3200	240755	99999	BIGFORK 12 S	198109	3018	HI	0		1		0	Inch
3200	240755	99999	BIGFORK 12 S	198110	118	HI	0		1		0	Inch
3200	240755	99999	BIGFORK 12 S	198110	218	HI	3		1		0.03	Inch
3200	240755	99999	BIGFORK 12 S	198110	318	HI	0	T	1		0	Inch
3200	240755	99999	BIGFORK 12 S	198110	418	HI	0		1		0	Inch
3200	240755	99999	BIGFORK 12 S	198110	518	HI	0		1		0	Inch
3200	240755	99999	BIGFORK 12 S	198110	618	HI	0		1		0	Inch
3200	240755	99999	BIGFORK 12 S	198110	718	HI	0	T	1		0	Inch
3200	240755	99999	BIGFORK 12 S	198110	818	HI	1		1		0.01	Inch
3200	240755	99999	BIGFORK 12 S	198110	918	HI	0		1		0	Inch
3200	240755	99999	BIGFORK 12 S	198110	1018	HI	0	T	1		0	Inch
3200	240755	99999	BIGFORK 12 S	198110	1118	HI	0	T	1		0	Inch
3200	240755	99999	BIGFORK 12 S	198110	1218	HI	0		1		0	Inch
3200	240755	99999	BIGFORK 12 S	198110	1318	HI	7		1		0.07	Inch
3200	240755	99999	BIGFORK 12 S	198110	1418	HI	0		1		0	Inch
3200	240755	99999	BIGFORK 12 S	198110	1518	HI	0		1		0	Inch
3200	240755	99999	BIGFORK 12 S	198110	1618	HI	0		1		0	Inch
3200	240755	99999	BIGFORK 12 S	198110	1718	HI	0		1		0	Inch
3200	240755	99999	BIGFORK 12 S	198110	1818	HI	0		1		0	Inch
3200	240755	99999	BIGFORK 12 S	198110	1918	HI	0		1		0	Inch
3200	240755	99999	BIGFORK 12 S	198110	2018	HI	12		1		0.12	Inch
3200	240755	99999	BIGFORK 12 S	198110	2118	HI	0		1		0	Inch
3200	240755	99999	BIGFORK 12 S	198110	2218	HI	0	T	1		0	Inch
3200	240755	99999	BIGFORK 12 S	198110	2318	HI	0		1		0	Inch
3200	240755	99999	BIGFORK 12 S	198110	2418	HI	0		1		0	Inch
3200	240755	99999	BIGFORK 12 S	198110	2518	HI	0		1		0	Inch
3200	240755	99999	BIGFORK 12 S	198110	2618	HI	0		1		0	Inch
3200	240755	99999	BIGFORK 12 S	198110	2718	HI	5		1		0.05	Inch
3200	240755	99999	BIGFORK 12 S	198110	2818	HI	0	T	1		0	Inch
3200	240755	99999	BIGFORK 12 S	198110	2918	HI	6		1		0.06	Inch
3200	240755	99999	BIGFORK 12 S	198110	3018	HI	0	T	1		0	Inch
3200	240755	99999	BIGFORK 12 S	198110	3118	HI	0		1		0	Inch
3200	240755	99999	BIGFORK 12 S	198111	118	HI	0		1		0	Inch
3200	240755	99999	BIGFORK 12 S	198111	218	HI	0		1		0	Inch
3200	240755	99999	BIGFORK 12 S	198111	318	HI	0		1		0	Inch
3200	240755	99999	BIGFORK 12 S	198111	418	HI	0		1		0	Inch
3200	240755	99999	BIGFORK 12 S	198111	518	HI	0		1		0	Inch
3200	240755	99999	BIGFORK 12 S	198111	618	HI	0		1		0	Inch
3200	240755	99999	BIGFORK 12 S	198111	718	HI	0		1		0	Inch
3200	240755	99999	BIGFORK 12 S	198111	818	HI	0		1		0	Inch
3200	240755	99999	BIGFORK 12 S	198111	918	HI	0		1		0	Inch
3200	240755	99999	BIGFORK 12 S	198111	1018	HI	0		1		0	Inch
3200	240755	99999	BIGFORK 12 S	198111	1118	HI	0		1		0	Inch
3200	240755	99999	BIGFORK 12 S	198111	1218	HI	3		1		0.03	Inch
3200	240755	99999	BIGFORK 12 S	198111	1318	HI	44		1		0.44	Inch
3200	240755	99999	BIGFORK 12 S	198111	1418	HI	19		1		0.19	Inch
3200	240755	99999	BIGFORK 12 S	198111	1518	HI	3		1		0.03	Inch
3200	240755	99999	BIGFORK 12 S	198111	1618	HI	0		1		0	Inch
3200	240755	99999	BIGFORK 12 S	198111	1718	HI	36		1		0.36	Inch
3200	240755	99999	BIGFORK 12 S	198111	1818	HI	37		1		0.37	Inch
3200	240755	99999	BIGFORK 12 S	198111	1918	HI	2		1		0.02	Inch
3200	240755	99999	BIGFORK 12 S	198111	2018	HI	0	T	1		0	Inch
3200	240755	99999	BIGFORK 12 S	198111	2118	HI	0		1		0	Inch
3200	240755	99999	BIGFORK 12 S	198111	2218	HI	15		1		0.15	Inch
3200	240755	99999	BIGFORK 12 S	198111	2318	HI	2		1		0.02	Inch
3200	240755	99999	BIGFORK 12 S	198111	2418	HI	0		1		0	Inch
3200	240755	99999	BIGFORK 12 S	198111	2518	HI	2		1		0.02	Inch
3200	240755	99999	BIGFORK 12 S	198111	2618	HI	0		1		0	Inch
3200	240755	99999	BIGFORK 12 S	198111	2718	HI	0		1		0	Inch
3200	240755	99999	BIGFORK 12 S	198111	2818	HI	0		1		0	Inch
3200	240755	99999	BIGFORK 12 S	198111	2918	HI	0		1		0	Inch
3200	240755	99999	BIGFORK 12 S	198111	3018	HI	0	T	1		0	Inch
3200	240755	99999	BIGFORK 12 S	198112	118	HI	2		1		0.02	Inch
3200	240755	99999	BIGFORK 12 S	198112	218	HI	25		1		0.25	Inch
3200	240755	99999	BIGFORK 12 S	198112	318	HI	7		1		0.07	Inch
3200	240755	99999	BIGFORK 12 S	198112	418	HI	1		1		0.01	Inch
3200	240755	99999	BIGFORK 12 S	198112	518	HI	0		1	corrected according to inhouse raw data logs	0	Inch
3200	240755	99999	BIGFORK 12 S	198112	618	HI	8		1	corrected according to inhouse raw data logs	0.08	Inch
3200	240755	99999	BIGFORK 12 S	198112	718	HI	17		1		0.17	Inch
3200	240755	99999	BIGFORK 12 S	198112	818	HI	0		1		0	Inch
3200	240755	99999	BIGFORK 12 S	198112	918	HI	0	T	1		0	Inch
3200	240755	99999	BIGFORK 12 S	198112	1018	HI	8		1		0.08	Inch
3200	240755	99999	BIGFORK 12 S	198112	1118	HI	1		1		0.01	Inch
3200	240755	99999	BIGFORK 12 S	198112	1218	HI	0		1		0	Inch
3200	240755	99999	BIGFORK 12 S	198112	1318	HI	0		1		0	Inch
3200	240755	99999	BIGFORK 12 S	198112	1418	HI	18		1		0.18	Inch
3200	240755	99999	BIGFORK 12 S	198112	1518	HI	5		1		0.05	Inch
3200	240755	99999	BIGFORK 12 S	198112	1699	HI	60			corrected according to inhouse raw data logs	0.6	Inch
3200	240755	99999	BIGFORK 12 S	198112	1799	HI	0			corrected according to inhouse raw data logs	0	Inch
3200	240755	99999	BIGFORK 12 S	198112	1899	HI	0			corrected according to inhouse raw data logs	0	Inch
3200	240755	99999	BIGFORK 12 S	198112	1999	HI	40			corrected according to inhouse raw data logs	0.4	Inch
3200	240755	99999	BIGFORK 12 S	198112	2099	HI	30			corrected according to inhouse raw data logs	0.3	Inch
3200	240755	99999	BIGFORK 12 S	198112	2199	HI	0			corrected according to inhouse raw data logs	0	Inch
3200	240755	99999	BIGFORK 12 S	198112	2299	HI	0			corrected according to inhouse raw data logs	0	Inch
3200	240755	99999	BIGFORK 12 S	198112	2399	HI	0			corrected according to inhouse raw data logs	0	Inch
3200	240755	99999	BIGFORK 12 S	198112	2499	HI	0			corrected according to inhouse raw data logs	0	Inch
3200	240755	99999	BIGFORK 12 S	198112	2599	HI	0			corrected according to inhouse raw data logs	0	Inch
3200	240755	99999	BIGFORK 12 S	198112	2699	HI	0			corrected according to inhouse raw data logs	0	Inch
3200	240755	99999	BIGFORK 12 S	198112	2799	HI	0			corrected according to inhouse raw data logs	0	Inch
3200	240755	99999	BIGFORK 12 S	198112	2899	HI	60			corrected according to inhouse raw data logs	0.6	Inch
3200	240755	99999	BIGFORK 12 S	198112	2999	HI	50			corrected according to inhouse raw data logs	0.5	Inch
3200	240755	99999	BIGFORK 12 S	198112	3018	HI	0	T	1		0	Inch
3200	240755	99999	BIGFORK 12 S	198112	3118	HI	0		1		0	Inch
3200	240755	99999	BIGFORK 12 S	198201	117	HI	0		R		0	Inch
3200	240755	99999	BIGFORK 12 S	198201	299	HI	-99999	M			-99999	Inch
3200	240755	99999	BIGFORK 12 S	198201	317	HI	0		R		0	Inch
3200	240755	99999	BIGFORK 12 S	198201	417	HI	42		0		0.42	Inch
3200	240755	99999	BIGFORK 12 S	198201	517	HI	2		0		0.02	Inch
3200	240755	99999	BIGFORK 12 S	198201	617	HI	0	T	0		0	Inch
3200	240755	99999	BIGFORK 12 S	198201	717	HI	2		0		0.02	Inch
3200	240755	99999	BIGFORK 12 S	198201	817	HI	0		R		0	Inch
3200	240755	99999	BIGFORK 12 S	198201	917	HI	0		R		0	Inch
3200	240755	99999	BIGFORK 12 S	198201	1017	HI	0		R		0	Inch
3200	240755	99999	BIGFORK 12 S	198201	1117	HI	53		0		0.53	Inch
3200	240755	99999	BIGFORK 12 S	198201	1217	HI	1		0		0.01	Inch
3200	240755	99999	BIGFORK 12 S	198201	1317	HI	8		0		0.08	Inch
3200	240755	99999	BIGFORK 12 S	198201	1417	HI	0		R		0	Inch
3200	240755	99999	BIGFORK 12 S	198201	1517	HI	0		R		0	Inch
3200	240755	99999	BIGFORK 12 S	198201	1617	HI	42		0		0.42	Inch
3200	240755	99999	BIGFORK 12 S	198201	1799	HI	-99999	M			-99999	Inch
3200	240755	99999	BIGFORK 12 S	198201	1817	HI	0		R		0	Inch
3200	240755	99999	BIGFORK 12 S	198201	1917	HI	0	T	0		0	Inch
3200	240755	99999	BIGFORK 12 S	198201	2017	HI	1		0		0.01	Inch
3200	240755	99999	BIGFORK 12 S	198201	2117	HI	0		R		0	Inch
3200	240755	99999	BIGFORK 12 S	198201	2299	HI	-99999	M			-99999	Inch
3200	240755	99999	BIGFORK 12 S	198201	2317	HI	78		0		0.78	Inch
3200	240755	99999	BIGFORK 12 S	198201	2417	HI	33		0		0.33	Inch
3200	240755	99999	BIGFORK 12 S	198201	2517	HI	0		R		0	Inch
3200	240755	99999	BIGFORK 12 S	198201	2617	HI	1		0		0.01	Inch
3200	240755	99999	BIGFORK 12 S	198201	2717	HI	0		R		0	Inch
3200	240755	99999	BIGFORK 12 S	198201	2817	HI	1		0		0.01	Inch
3200	240755	99999	BIGFORK 12 S	198201	2917	HI	0		R		0	Inch
3200	240755	99999	BIGFORK 12 S	198201	3017	HI	0	T	J		0	Inch
3200	240755	99999	BIGFORK 12 S	198201	3117	HI	6		0		0.06	Inch
3200	240755	99999	BIGFORK 12 S	198202	117	HI	0		0		0	Inch
3200	240755	99999	BIGFORK 12 S	198202	217	HI	7		0		0.07	Inch
3200	240755	99999	BIGFORK 12 S	198202	317	HI	1		0		0.01	Inch
3200	240755	99999	BIGFORK 12 S	198202	417	HI	1		0		0.01	Inch
3200	240755	99999	BIGFORK 12 S	198202	517	HI	99999	S	0		99999	Inch
3200	240755	99999	BIGFORK 12 S	198202	699	HI	-99999	M			-99999	Inch
3200	240755	99999	BIGFORK 12 S	198202	799	HI	-99999	M			-99999	Inch
3200	240755	99999	BIGFORK 12 S	198202	817	HI	16	A	0		0.16	Inch
3200	240755	99999	BIGFORK 12 S	198202	917	HI	0		0		0	Inch
3200	240755	99999	BIGFORK 12 S	198202	1017	HI	0		0		0	Inch
3200	240755	99999	BIGFORK 12 S	198202	1117	HI	0		0		0	Inch
3200	240755	99999	BIGFORK 12 S	198202	1217	HI	0		0		0	Inch
3200	240755	99999	BIGFORK 12 S	198202	1317	HI	16		0		0.16	Inch
3200	240755	99999	BIGFORK 12 S	198202	1417	HI	9		0		0.09	Inch
3200	240755	99999	BIGFORK 12 S	198202	1517	HI	0		0		0	Inch
3200	240755	99999	BIGFORK 12 S	198202	1617	HI	15		0		0.15	Inch
3200	240755	99999	BIGFORK 12 S	198202	1717	HI	0		0		0	Inch
3200	240755	99999	BIGFORK 12 S	198202	1817	HI	0		0		0	Inch
3200	240755	99999	BIGFORK 12 S	198202	1917	HI	18		0		0.18	Inch
3200	240755	99999	BIGFORK 12 S	198202	2017	HI	8		0		0.08	Inch
3200	240755	99999	BIGFORK 12 S	198202	2117	HI	7		0		0.07	Inch
3200	240755	99999	BIGFORK 12 S	198202	2217	HI	20		0		0.2	Inch
3200	240755	99999	BIGFORK 12 S	198202	2317	HI	3		0		0.03	Inch
3200	240755	99999	BIGFORK 12 S	198202	2417	HI	2		0		0.02	Inch
3200	240755	99999	BIGFORK 12 S	198202	2517	HI	0		0		0	Inch
3200	240755	99999	BIGFORK 12 S	198202	2617	HI	0		0		0	Inch
3200	240755	99999	BIGFORK 12 S	198202	2717	HI	0		0		0	Inch
3200	240755	99999	BIGFORK 12 S	198202	2817	HI	0		0		0	Inch
3200	240755	99999	BIGFORK 12 S	198203	117	HI	3		0		0.03	Inch
3200	240755	99999	BIGFORK 12 S	198203	217	HI	22		0		0.22	Inch
3200	240755	99999	BIGFORK 12 S	198203	317	HI	1		0		0.01	Inch
3200	240755	99999	BIGFORK 12 S	198203	417	HI	14		0		0.14	Inch
3200	240755	99999	BIGFORK 12 S	198203	517	HI	0		0		0	Inch
3200	240755	99999	BIGFORK 12 S	198203	617	HI	0		0		0	Inch
3200	240755	99999	BIGFORK 12 S	198203	717	HI	3		0		0.03	Inch
3200	240755	99999	BIGFORK 12 S	198203	817	HI	0		0		0	Inch
3200	240755	99999	BIGFORK 12 S	198203	917	HI	1		0		0.01	Inch
3200	240755	99999	BIGFORK 12 S	198203	1017	HI	10		0		0.1	Inch
3200	240755	99999	BIGFORK 12 S	198203	1117	HI	0		0		0	Inch
3200	240755	99999	BIGFORK 12 S	198203	1217	HI	10		0		0.1	Inch
3200	240755	99999	BIGFORK 12 S	198203	1317	HI	0		R		0	Inch
3200	240755	99999	BIGFORK 12 S	198203	1417	HI	0	T	0		0	Inch
3200	240755	99999	BIGFORK 12 S	198203	1517	HI	41		0		0.41	Inch
3200	240755	99999	BIGFORK 12 S	198203	1617	HI	12		0		0.12	Inch
3200	240755	99999	BIGFORK 12 S	198203	1717	HI	0		0		0	Inch
3200	240755	99999	BIGFORK 12 S	198203	1817	HI	0		0		0	Inch
3200	240755	99999	BIGFORK 12 S	198203	1917	HI	0	T	0		0	Inch
3200	240755	99999	BIGFORK 12 S	198203	2017	HI	0	T	0		0	Inch
3200	240755	99999	BIGFORK 12 S	198203	2117	HI	0		0		0	Inch
3200	240755	99999	BIGFORK 12 S	198203	2217	HI	0		0		0	Inch
3200	240755	99999	BIGFORK 12 S	198203	2317	HI	0		0		0	Inch
3200	240755	99999	BIGFORK 12 S	198203	2417	HI	0		0		0	Inch
3200	240755	99999	BIGFORK 12 S	198203	2517	HI	0		0		0	Inch
3200	240755	99999	BIGFORK 12 S	198203	2617	HI	0		0		0	Inch
3200	240755	99999	BIGFORK 12 S	198203	2717	HI	7		0		0.07	Inch
3200	240755	99999	BIGFORK 12 S	198203	2817	HI	0		0		0	Inch
3200	240755	99999	BIGFORK 12 S	198203	2917	HI	19		0		0.19	Inch
3200	240755	99999	BIGFORK 12 S	198203	3017	HI	0		0		0	Inch
3200	240755	99999	BIGFORK 12 S	198203	3117	HI	9		0		0.09	Inch
3200	240755	99999	BIGFORK 12 S	198204	117	HI	6		0		0.06	Inch
3200	240755	99999	BIGFORK 12 S	198204	217	HI	0		0		0	Inch
3200	240755	99999	BIGFORK 12 S	198204	317	HI	25		0		0.25	Inch
3200	240755	99999	BIGFORK 12 S	198204	417	HI	14		0		0.14	Inch
3200	240755	99999	BIGFORK 12 S	198204	517	HI	20		0		0.2	Inch
3200	240755	99999	BIGFORK 12 S	198204	617	HI	0		0		0	Inch
3200	240755	99999	BIGFORK 12 S	198204	717	HI	0		0		0	Inch
3200	240755	99999	BIGFORK 12 S	198204	817	HI	0		0		0	Inch
3200	240755	99999	BIGFORK 12 S	198204	917	HI	15		0		0.15	Inch
3200	240755	99999	BIGFORK 12 S	198204	1017	HI	0		R		0	Inch
3200	240755	99999	BIGFORK 12 S	198204	1117	HI	35		0		0.35	Inch
3200	240755	99999	BIGFORK 12 S	198204	1217	HI	44		0		0.44	Inch
3200	240755	99999	BIGFORK 12 S	198204	1317	HI	9		0		0.09	Inch
3200	240755	99999	BIGFORK 12 S	198204	1417	HI	11		0		0.11	Inch
3200	240755	99999	BIGFORK 12 S	198204	1517	HI	2		0		0.02	Inch
3200	240755	99999	BIGFORK 12 S	198204	1617	HI	0		0		0	Inch
3200	240755	99999	BIGFORK 12 S	198204	1717	HI	0		0		0	Inch
3200	240755	99999	BIGFORK 12 S	198204	1817	HI	0	T	0		0	Inch
3200	240755	99999	BIGFORK 12 S	198204	1917	HI	0	T	0		0	Inch
3200	240755	99999	BIGFORK 12 S	198204	2017	HI	0		0		0	Inch
3200	240755	99999	BIGFORK 12 S	198204	2117	HI	0		0		0	Inch
3200	240755	99999	BIGFORK 12 S	198204	2217	HI	0		R		0	Inch
3200	240755	99999	BIGFORK 12 S	198204	2317	HI	0		R		0	Inch
3200	240755	99999	BIGFORK 12 S	198204	2417	HI	0		0		0	Inch
3200	240755	99999	BIGFORK 12 S	198204	2517	HI	0		R		0	Inch
3200	240755	99999	BIGFORK 12 S	198204	2617	HI	0		0		0	Inch
3200	240755	99999	BIGFORK 12 S	198204	2717	HI	0		0		0	Inch
3200	240755	99999	BIGFORK 12 S	198204	2817	HI	0		0		0	Inch
3200	240755	99999	BIGFORK 12 S	198204	2917	HI	0		0		0	Inch
3200	240755	99999	BIGFORK 12 S	198204	3017	HI	0		0		0	Inch
3200	240755	99999	BIGFORK 12 S	198205	117	HI	0		0	values from original raw data; NOAA records incorrect	0	Inch
3200	240755	99999	BIGFORK 12 S	198205	217	HI	0		0	values from original raw data; NOAA records incorrect	0	Inch
3200	240755	99999	BIGFORK 12 S	198205	317	HI	0		0	values from original raw data; NOAA records incorrect	0	Inch
3200	240755	99999	BIGFORK 12 S	198205	417	HI	2		0	values from original raw data; NOAA records incorrect	0.02	Inch
3200	240755	99999	BIGFORK 12 S	198205	517	HI	0		0	values from original raw data; NOAA records incorrect	0	Inch
3200	240755	99999	BIGFORK 12 S	198205	617	HI	0		0	values from original raw data; NOAA records incorrect	0	Inch
3200	240755	99999	BIGFORK 12 S	198205	717	HI	14		0	values from original raw data; NOAA records incorrect	0.14	Inch
3200	240755	99999	BIGFORK 12 S	198205	817	HI	20		0	values from original raw data; NOAA records incorrect	0.2	Inch
3200	240755	99999	BIGFORK 12 S	198205	917	HI	0		0	values from original raw data; NOAA records incorrect	0	Inch
3200	240755	99999	BIGFORK 12 S	198205	1017	HI	0		0	values from original raw data; NOAA records incorrect	0	Inch
3200	240755	99999	BIGFORK 12 S	198205	1117	HI	0		0	values from original raw data; NOAA records incorrect	0	Inch
3200	240755	99999	BIGFORK 12 S	198205	1217	HI	0		0	values from original raw data; NOAA records incorrect	0	Inch
3200	240755	99999	BIGFORK 12 S	198205	1317	HI	11		0	values from original raw data; NOAA records incorrect	0.11	Inch
3200	240755	99999	BIGFORK 12 S	198205	1417	HI	0		0	values from original raw data; NOAA records incorrect	0	Inch
3200	240755	99999	BIGFORK 12 S	198205	1517	HI	0		0	values from original raw data; NOAA records incorrect	0	Inch
3200	240755	99999	BIGFORK 12 S	198205	1617	HI	0		0	values from original raw data; NOAA records incorrect	0	Inch
3200	240755	99999	BIGFORK 12 S	198205	1717	HI	0		0	values from original raw data; NOAA records incorrect	0	Inch
3200	240755	99999	BIGFORK 12 S	198205	1817	HI	33		0	values from original raw data; NOAA records incorrect	0.33	Inch
3200	240755	99999	BIGFORK 12 S	198205	1917	HI	11		0	values from original raw data; NOAA records incorrect	0.11	Inch
3200	240755	99999	BIGFORK 12 S	198205	2017	HI	0		0	values from original raw data; NOAA records incorrect	0	Inch
3200	240755	99999	BIGFORK 12 S	198205	2117	HI	0		0	values from original raw data; NOAA records incorrect	0	Inch
3200	240755	99999	BIGFORK 12 S	198205	2217	HI	0		0	values from original raw data; NOAA records incorrect	0	Inch
3200	240755	99999	BIGFORK 12 S	198205	2317	HI	4		0	values from original raw data; NOAA records incorrect	0.04	Inch
3200	240755	99999	BIGFORK 12 S	198205	2417	HI	0		0	values from original raw data; NOAA records incorrect	0	Inch
3200	240755	99999	BIGFORK 12 S	198205	2517	HI	0		0	values from original raw data; NOAA records incorrect	0	Inch
3200	240755	99999	BIGFORK 12 S	198205	2617	HI	40		0	values from original raw data; NOAA records incorrect	0.4	Inch
3200	240755	99999	BIGFORK 12 S	198205	2717	HI	28		0	values from original raw data; NOAA records incorrect	0.28	Inch
3200	240755	99999	BIGFORK 12 S	198205	2817	HI	12		0	values from original raw data; NOAA records incorrect	0.12	Inch
3200	240755	99999	BIGFORK 12 S	198205	2917	HI	25		0	values from original raw data; NOAA records incorrect	0.25	Inch
3200	240755	99999	BIGFORK 12 S	198205	3017	HI	0		0	values from original raw data; NOAA records incorrect	0	Inch
3200	240755	99999	BIGFORK 12 S	198205	3117	HI	0		0	values from original raw data; NOAA records incorrect	0	Inch
3200	240755	99999	BIGFORK 12 S	198206	117	HI	0		0		0	Inch
3200	240755	99999	BIGFORK 12 S	198206	217	HI	0		0		0	Inch
3200	240755	99999	BIGFORK 12 S	198206	317	HI	1		0		0.01	Inch
3200	240755	99999	BIGFORK 12 S	198206	417	HI	2		0		0.02	Inch
3200	240755	99999	BIGFORK 12 S	198206	517	HI	3		0		0.03	Inch
3200	240755	99999	BIGFORK 12 S	198206	617	HI	2		0		0.02	Inch
3200	240755	99999	BIGFORK 12 S	198206	717	HI	0		0		0	Inch
3200	240755	99999	BIGFORK 12 S	198206	817	HI	0		0		0	Inch
3200	240755	99999	BIGFORK 12 S	198206	917	HI	0		0		0	Inch
3200	240755	99999	BIGFORK 12 S	198206	1017	HI	0		0		0	Inch
3200	240755	99999	BIGFORK 12 S	198206	1117	HI	0		0		0	Inch
3200	240755	99999	BIGFORK 12 S	198206	1217	HI	0		0		0	Inch
3200	240755	99999	BIGFORK 12 S	198206	1317	HI	0		0		0	Inch
3200	240755	99999	BIGFORK 12 S	198206	1417	HI	0		0		0	Inch
3200	240755	99999	BIGFORK 12 S	198206	1517	HI	14		0		0.14	Inch
3200	240755	99999	BIGFORK 12 S	198206	1617	HI	0		0		0	Inch
3200	240755	99999	BIGFORK 12 S	198206	1717	HI	7		0		0.07	Inch
3200	240755	99999	BIGFORK 12 S	198206	1817	HI	0		0		0	Inch
3200	240755	99999	BIGFORK 12 S	198206	1917	HI	0		0		0	Inch
3200	240755	99999	BIGFORK 12 S	198206	2017	HI	0		0		0	Inch
3200	240755	99999	BIGFORK 12 S	198206	2117	HI	0		0		0	Inch
3200	240755	99999	BIGFORK 12 S	198206	2217	HI	2		0		0.02	Inch
3200	240755	99999	BIGFORK 12 S	198206	2317	HI	2		0		0.02	Inch
3200	240755	99999	BIGFORK 12 S	198206	2417	HI	0		0		0	Inch
3200	240755	99999	BIGFORK 12 S	198206	2517	HI	0		0		0	Inch
3200	240755	99999	BIGFORK 12 S	198206	2617	HI	0		0		0	Inch
3200	240755	99999	BIGFORK 12 S	198206	2717	HI	99999	S	0		99999	Inch
3200	240755	99999	BIGFORK 12 S	198206	2817	HI	31	A	0		0.31	Inch
3200	240755	99999	BIGFORK 12 S	198206	2917	HI	38		0		0.38	Inch
3200	240755	99999	BIGFORK 12 S	198206	3017	HI	69		0		0.69	Inch
3200	240755	99999	BIGFORK 12 S	198207	117	HI	15		0		0.15	Inch
3200	240755	99999	BIGFORK 12 S	198207	217	HI	26		0		0.26	Inch
3200	240755	99999	BIGFORK 12 S	198207	317	HI	8		0		0.08	Inch
3200	240755	99999	BIGFORK 12 S	198207	417	HI	0		0		0	Inch
3200	240755	99999	BIGFORK 12 S	198207	517	HI	17		0		0.17	Inch
3200	240755	99999	BIGFORK 12 S	198207	617	HI	12		0		0.12	Inch
3200	240755	99999	BIGFORK 12 S	198207	717	HI	0		0		0	Inch
3200	240755	99999	BIGFORK 12 S	198207	817	HI	0		0		0	Inch
3200	240755	99999	BIGFORK 12 S	198207	917	HI	7		0		0.07	Inch
3200	240755	99999	BIGFORK 12 S	198207	1017	HI	0		0		0	Inch
3200	240755	99999	BIGFORK 12 S	198207	1117	HI	0		0		0	Inch
3200	240755	99999	BIGFORK 12 S	198207	1217	HI	3		0		0.03	Inch
3200	240755	99999	BIGFORK 12 S	198207	1317	HI	0		0		0	Inch
3200	240755	99999	BIGFORK 12 S	198207	1417	HI	62		0		0.62	Inch
3200	240755	99999	BIGFORK 12 S	198207	1517	HI	0		0		0	Inch
3200	240755	99999	BIGFORK 12 S	198207	1617	HI	58		0		0.58	Inch
3200	240755	99999	BIGFORK 12 S	198207	1717	HI	1		0		0.01	Inch
3200	240755	99999	BIGFORK 12 S	198207	1817	HI	0		0		0	Inch
3200	240755	99999	BIGFORK 12 S	198207	1917	HI	0		0		0	Inch
3200	240755	99999	BIGFORK 12 S	198207	2017	HI	0		0		0	Inch
3200	240755	99999	BIGFORK 12 S	198207	2117	HI	0		0		0	Inch
3200	240755	99999	BIGFORK 12 S	198207	2217	HI	0		0		0	Inch
3200	240755	99999	BIGFORK 12 S	198207	2317	HI	0		0		0	Inch
3200	240755	99999	BIGFORK 12 S	198207	2417	HI	0		0		0	Inch
3200	240755	99999	BIGFORK 12 S	198207	2517	HI	0		0		0	Inch
3200	240755	99999	BIGFORK 12 S	198207	2617	HI	5		0		0.05	Inch
3200	240755	99999	BIGFORK 12 S	198207	2717	HI	0		0		0	Inch
3200	240755	99999	BIGFORK 12 S	198207	2817	HI	0		0		0	Inch
3200	240755	99999	BIGFORK 12 S	198207	2917	HI	0		0		0	Inch
3200	240755	99999	BIGFORK 12 S	198207	3017	HI	0		0		0	Inch
3200	240755	99999	BIGFORK 12 S	198207	3117	HI	1		0		0.01	Inch
3200	240755	99999	BIGFORK 12 S	198208	117	HI	4		0		0.04	Inch
3200	240755	99999	BIGFORK 12 S	198208	217	HI	18		0		0.18	Inch
3200	240755	99999	BIGFORK 12 S	198208	317	HI	44		0		0.44	Inch
3200	240755	99999	BIGFORK 12 S	198208	417	HI	0		0		0	Inch
3200	240755	99999	BIGFORK 12 S	198208	517	HI	0		0		0	Inch
3200	240755	99999	BIGFORK 12 S	198208	617	HI	0		0		0	Inch
3200	240755	99999	BIGFORK 12 S	198208	717	HI	0		0		0	Inch
3200	240755	99999	BIGFORK 12 S	198208	817	HI	0		0		0	Inch
3200	240755	99999	BIGFORK 12 S	198208	917	HI	6		0		0.06	Inch
3200	240755	99999	BIGFORK 12 S	198208	1017	HI	0		0		0	Inch
3200	240755	99999	BIGFORK 12 S	198208	1117	HI	2		0		0.02	Inch
3200	240755	99999	BIGFORK 12 S	198208	1217	HI	0		0		0	Inch
3200	240755	99999	BIGFORK 12 S	198208	1317	HI	0		0		0	Inch
3200	240755	99999	BIGFORK 12 S	198208	1417	HI	31		0		0.31	Inch
3200	240755	99999	BIGFORK 12 S	198208	1517	HI	15		0		0.15	Inch
3200	240755	99999	BIGFORK 12 S	198208	1617	HI	0		0		0	Inch
3200	240755	99999	BIGFORK 12 S	198208	1717	HI	0		0		0	Inch
3200	240755	99999	BIGFORK 12 S	198208	1817	HI	0		0		0	Inch
3200	240755	99999	BIGFORK 12 S	198208	1917	HI	0		0		0	Inch
3200	240755	99999	BIGFORK 12 S	198208	2017	HI	0		0		0	Inch
3200	240755	99999	BIGFORK 12 S	198208	2117	HI	35		0		0.35	Inch
3200	240755	99999	BIGFORK 12 S	198208	2217	HI	6		0		0.06	Inch
3200	240755	99999	BIGFORK 12 S	198208	2317	HI	0		0		0	Inch
3200	240755	99999	BIGFORK 12 S	198208	2417	HI	0		0		0	Inch
3200	240755	99999	BIGFORK 12 S	198208	2517	HI	0		0		0	Inch
3200	240755	99999	BIGFORK 12 S	198208	2617	HI	0		0		0	Inch
3200	240755	99999	BIGFORK 12 S	198208	2717	HI	0		0		0	Inch
3200	240755	99999	BIGFORK 12 S	198208	2817	HI	0		0		0	Inch
3200	240755	99999	BIGFORK 12 S	198208	2917	HI	0		0		0	Inch
3200	240755	99999	BIGFORK 12 S	198208	3017	HI	8		0		0.08	Inch
3200	240755	99999	BIGFORK 12 S	198208	3117	HI	3		0		0.03	Inch
3200	240755	99999	BIGFORK 12 S	198209	117	HI	0	T	0		0	Inch
3200	240755	99999	BIGFORK 12 S	198209	217	HI	0		0		0	Inch
3200	240755	99999	BIGFORK 12 S	198209	317	HI	0		0		0	Inch
3200	240755	99999	BIGFORK 12 S	198209	417	HI	12		0		0.12	Inch
3200	240755	99999	BIGFORK 12 S	198209	517	HI	0		0		0	Inch
3200	240755	99999	BIGFORK 12 S	198209	617	HI	0		0		0	Inch
3200	240755	99999	BIGFORK 12 S	198209	717	HI	0		0		0	Inch
3200	240755	99999	BIGFORK 12 S	198209	817	HI	0		0		0	Inch
3200	240755	99999	BIGFORK 12 S	198209	917	HI	0		0		0	Inch
3200	240755	99999	BIGFORK 12 S	198209	1017	HI	41		0		0.41	Inch
3200	240755	99999	BIGFORK 12 S	198209	1117	HI	1		0		0.01	Inch
3200	240755	99999	BIGFORK 12 S	198209	1217	HI	7		0		0.07	Inch
3200	240755	99999	BIGFORK 12 S	198209	1317	HI	0	T	0		0	Inch
3200	240755	99999	BIGFORK 12 S	198209	1417	HI	0		0		0	Inch
3200	240755	99999	BIGFORK 12 S	198209	1517	HI	0		0		0	Inch
3200	240755	99999	BIGFORK 12 S	198209	1617	HI	0		0		0	Inch
3200	240755	99999	BIGFORK 12 S	198209	1717	HI	0		0		0	Inch
3200	240755	99999	BIGFORK 12 S	198209	1817	HI	0		0		0	Inch
3200	240755	99999	BIGFORK 12 S	198209	1917	HI	0		0		0	Inch
3200	240755	99999	BIGFORK 12 S	198209	2017	HI	0		0		0	Inch
3200	240755	99999	BIGFORK 12 S	198209	2117	HI	25		0		0.25	Inch
3200	240755	99999	BIGFORK 12 S	198209	2217	HI	14		0		0.14	Inch
3200	240755	99999	BIGFORK 12 S	198209	2317	HI	0		0		0	Inch
3200	240755	99999	BIGFORK 12 S	198209	2417	HI	0		0		0	Inch
3200	240755	99999	BIGFORK 12 S	198209	2517	HI	0	T	0		0	Inch
3200	240755	99999	BIGFORK 12 S	198209	2617	HI	64		0		0.64	Inch
3200	240755	99999	BIGFORK 12 S	198209	2717	HI	11		0		0.11	Inch
3200	240755	99999	BIGFORK 12 S	198209	2817	HI	87		0		0.87	Inch
3200	240755	99999	BIGFORK 12 S	198209	2917	HI	28		0		0.28	Inch
3200	240755	99999	BIGFORK 12 S	198209	3017	HI	1		0		0.01	Inch
3200	240755	99999	BIGFORK 12 S	198210	117	HI	0		R		0	Inch
3200	240755	99999	BIGFORK 12 S	198210	217	HI	0		R		0	Inch
3200	240755	99999	BIGFORK 12 S	198210	317	HI	4		0		0.04	Inch
3200	240755	99999	BIGFORK 12 S	198210	417	HI	0		R		0	Inch
3200	240755	99999	BIGFORK 12 S	198210	517	HI	0		R		0	Inch
3200	240755	99999	BIGFORK 12 S	198210	617	HI	0		R		0	Inch
3200	240755	99999	BIGFORK 12 S	198210	717	HI	2		S		0.02	Inch
3200	240755	99999	BIGFORK 12 S	198210	817	HI	0	T	0		0	Inch
3200	240755	99999	BIGFORK 12 S	198210	917	HI	0		R		0	Inch
3200	240755	99999	BIGFORK 12 S	198210	1017	HI	0		R		0	Inch
3200	240755	99999	BIGFORK 12 S	198210	1117	HI	0		R		0	Inch
3200	240755	99999	BIGFORK 12 S	198210	1217	HI	0		R		0	Inch
3200	240755	99999	BIGFORK 12 S	198210	1317	HI	0		R		0	Inch
3200	240755	99999	BIGFORK 12 S	198210	1417	HI	0		R		0	Inch
3200	240755	99999	BIGFORK 12 S	198210	1517	HI	0		R		0	Inch
3200	240755	99999	BIGFORK 12 S	198210	1617	HI	1		0		0.01	Inch
3200	240755	99999	BIGFORK 12 S	198210	1717	HI	10		0		0.1	Inch
3200	240755	99999	BIGFORK 12 S	198210	1817	HI	8		0		0.08	Inch
3200	240755	99999	BIGFORK 12 S	198210	1917	HI	3		0		0.03	Inch
3200	240755	99999	BIGFORK 12 S	198210	2017	HI	0		R		0	Inch
3200	240755	99999	BIGFORK 12 S	198210	2117	HI	0		R		0	Inch
3200	240755	99999	BIGFORK 12 S	198210	2217	HI	3		S		0.03	Inch
3200	240755	99999	BIGFORK 12 S	198210	2317	HI	23		S		0.23	Inch
3200	240755	99999	BIGFORK 12 S	198210	2417	HI	0	T	0		0	Inch
3200	240755	99999	BIGFORK 12 S	198210	2517	HI	0	T	0		0	Inch
3200	240755	99999	BIGFORK 12 S	198210	2617	HI	10		0		0.1	Inch
3200	240755	99999	BIGFORK 12 S	198210	2717	HI	8		0		0.08	Inch
3200	240755	99999	BIGFORK 12 S	198210	2817	HI	0	T	0		0	Inch
3200	240755	99999	BIGFORK 12 S	198210	2917	HI	12		0		0.12	Inch
3200	240755	99999	BIGFORK 12 S	198210	3017	HI	0		R		0	Inch
3200	240755	99999	BIGFORK 12 S	198210	3117	HI	0		R		0	Inch
3200	240755	99999	BIGFORK 12 S	198211	117	HI	11		0		0.11	Inch
3200	240755	99999	BIGFORK 12 S	198211	217	HI	0		R		0	Inch
3200	240755	99999	BIGFORK 12 S	198211	317	HI	0		R		0	Inch
3200	240755	99999	BIGFORK 12 S	198211	417	HI	0		R		0	Inch
3200	240755	99999	BIGFORK 12 S	198211	517	HI	7		0		0.07	Inch
3200	240755	99999	BIGFORK 12 S	198211	617	HI	4		0		0.04	Inch
3200	240755	99999	BIGFORK 12 S	198211	717	HI	0	T	0		0	Inch
3200	240755	99999	BIGFORK 12 S	198211	817	HI	0		R		0	Inch
3200	240755	99999	BIGFORK 12 S	198211	917	HI	0		R		0	Inch
3200	240755	99999	BIGFORK 12 S	198211	1017	HI	0		R		0	Inch
3200	240755	99999	BIGFORK 12 S	198211	1117	HI	16		0		0.16	Inch
3200	240755	99999	BIGFORK 12 S	198211	1217	HI	3		0		0.03	Inch
3200	240755	99999	BIGFORK 12 S	198211	1317	HI	19		0		0.19	Inch
3200	240755	99999	BIGFORK 12 S	198211	1417	HI	0		R		0	Inch
3200	240755	99999	BIGFORK 12 S	198211	1517	HI	0		R		0	Inch
3200	240755	99999	BIGFORK 12 S	198211	1617	HI	0		R		0	Inch
3200	240755	99999	BIGFORK 12 S	198211	1717	HI	3		0		0.03	Inch
3200	240755	99999	BIGFORK 12 S	198211	1817	HI	5		0		0.05	Inch
3200	240755	99999	BIGFORK 12 S	198211	1917	HI	44		0		0.44	Inch
3200	240755	99999	BIGFORK 12 S	198211	2017	HI	1		0		0.01	Inch
3200	240755	99999	BIGFORK 12 S	198211	2117	HI	1		0		0.01	Inch
3200	240755	99999	BIGFORK 12 S	198211	2217	HI	0		R		0	Inch
3200	240755	99999	BIGFORK 12 S	198211	2317	HI	5		0		0.05	Inch
3200	240755	99999	BIGFORK 12 S	198211	2417	HI	0		R		0	Inch
3200	240755	99999	BIGFORK 12 S	198211	2517	HI	0		R		0	Inch
3200	240755	99999	BIGFORK 12 S	198211	2617	HI	0		R		0	Inch
3200	240755	99999	BIGFORK 12 S	198211	2717	HI	0		R		0	Inch
3200	240755	99999	BIGFORK 12 S	198211	2817	HI	2		0		0.02	Inch
3200	240755	99999	BIGFORK 12 S	198211	2917	HI	11		0		0.11	Inch
3200	240755	99999	BIGFORK 12 S	198211	3017	HI	0		R		0	Inch
3200	240755	99999	BIGFORK 12 S	198212	117	HI	0		R		0	Inch
3200	240755	99999	BIGFORK 12 S	198212	217	HI	4		0		0.04	Inch
3200	240755	99999	BIGFORK 12 S	198212	317	HI	1		0		0.01	Inch
3200	240755	99999	BIGFORK 12 S	198212	417	HI	0		R		0	Inch
3200	240755	99999	BIGFORK 12 S	198212	517	HI	0		0		0	Inch
3200	240755	99999	BIGFORK 12 S	198212	617	HI	5		0		0.05	Inch
3200	240755	99999	BIGFORK 12 S	198212	717	HI	0		R		0	Inch
3200	240755	99999	BIGFORK 12 S	198212	817	HI	0		0		0	Inch
3200	240755	99999	BIGFORK 12 S	198212	917	HI	0		R		0	Inch
3200	240755	99999	BIGFORK 12 S	198212	1017	HI	0		R		0	Inch
3200	240755	99999	BIGFORK 12 S	198212	1117	HI	0		R		0	Inch
3200	240755	99999	BIGFORK 12 S	198212	1217	HI	3		0		0.03	Inch
3200	240755	99999	BIGFORK 12 S	198212	1317	HI	99999	S	0		99999	Inch
3200	240755	99999	BIGFORK 12 S	198212	1499	HI	-99999	M			-99999	Inch
3200	240755	99999	BIGFORK 12 S	198212	1517	HI	53	A	0		0.53	Inch
3200	240755	99999	BIGFORK 12 S	198212	1617	HI	17		0		0.17	Inch
3200	240755	99999	BIGFORK 12 S	198212	1717	HI	13		0		0.13	Inch
3200	240755	99999	BIGFORK 12 S	198212	1817	HI	0		R		0	Inch
3200	240755	99999	BIGFORK 12 S	198212	1917	HI	6		0		0.06	Inch
3200	240755	99999	BIGFORK 12 S	198212	2017	HI	8		0		0.08	Inch
3200	240755	99999	BIGFORK 12 S	198212	2117	HI	13		0		0.13	Inch
3200	240755	99999	BIGFORK 12 S	198212	2217	HI	12		0		0.12	Inch
3200	240755	99999	BIGFORK 12 S	198212	2317	HI	0	T	0		0	Inch
3200	240755	99999	BIGFORK 12 S	198212	2417	HI	0		0		0	Inch
3200	240755	99999	BIGFORK 12 S	198212	2517	HI	0		0		0	Inch
3200	240755	99999	BIGFORK 12 S	198212	2617	HI	4		0		0.04	Inch
3200	240755	99999	BIGFORK 12 S	198212	2717	HI	5		0		0.05	Inch
3200	240755	99999	BIGFORK 12 S	198212	2817	HI	0	T	0		0	Inch
3200	240755	99999	BIGFORK 12 S	198212	2917	HI	99999	S	0		99999	Inch
3200	240755	99999	BIGFORK 12 S	198212	3017	HI	6	A	0		0.06	Inch
3200	240755	99999	BIGFORK 12 S	198212	3117	HI	0	T	0		0	Inch
3200	240755	99999	BIGFORK 12 S	198301	117	HI	0		S		0	Inch
3200	240755	99999	BIGFORK 12 S	198301	217	HI	0	T	0		0	Inch
3200	240755	99999	BIGFORK 12 S	198301	317	HI	3		0		0.03	Inch
3200	240755	99999	BIGFORK 12 S	198301	417	HI	0		S		0	Inch
3200	240755	99999	BIGFORK 12 S	198301	517	HI	7		0		0.07	Inch
3200	240755	99999	BIGFORK 12 S	198301	617	HI	0	T	0		0	Inch
3200	240755	99999	BIGFORK 12 S	198301	717	HI	2		0		0.02	Inch
3200	240755	99999	BIGFORK 12 S	198301	817	HI	4		0		0.04	Inch
3200	240755	99999	BIGFORK 12 S	198301	917	HI	0		R		0	Inch
3200	240755	99999	BIGFORK 12 S	198301	1017	HI	0		R		0	Inch
3200	240755	99999	BIGFORK 12 S	198301	1117	HI	0		R		0	Inch
3200	240755	99999	BIGFORK 12 S	198301	1217	HI	0		R		0	Inch
3200	240755	99999	BIGFORK 12 S	198301	1317	HI	0		R		0	Inch
3200	240755	99999	BIGFORK 12 S	198301	1417	HI	0		R		0	Inch
3200	240755	99999	BIGFORK 12 S	198301	1517	HI	0		R		0	Inch
3200	240755	99999	BIGFORK 12 S	198301	1617	HI	0		R		0	Inch
3200	240755	99999	BIGFORK 12 S	198301	1717	HI	0		R		0	Inch
3200	240755	99999	BIGFORK 12 S	198301	1817	HI	0		R		0	Inch
3200	240755	99999	BIGFORK 12 S	198301	1917	HI	0		R		0	Inch
3200	240755	99999	BIGFORK 12 S	198301	2017	HI	0		R		0	Inch
3200	240755	99999	BIGFORK 12 S	198301	2117	HI	0	T	0		0	Inch
3200	240755	99999	BIGFORK 12 S	198301	2217	HI	0	T	0		0	Inch
3200	240755	99999	BIGFORK 12 S	198301	2317	HI	0		R		0	Inch
3200	240755	99999	BIGFORK 12 S	198301	2417	HI	20		0		0.2	Inch
3200	240755	99999	BIGFORK 12 S	198301	2517	HI	0		R		0	Inch
3200	240755	99999	BIGFORK 12 S	198301	2617	HI	0		R		0	Inch
3200	240755	99999	BIGFORK 12 S	198301	2717	HI	0	T	0		0	Inch
3200	240755	99999	BIGFORK 12 S	198301	2817	HI	0		R		0	Inch
3200	240755	99999	BIGFORK 12 S	198301	2917	HI	0		R		0	Inch
3200	240755	99999	BIGFORK 12 S	198301	3017	HI	1		0		0.01	Inch
3200	240755	99999	BIGFORK 12 S	198301	3117	HI	0	T	0		0	Inch
3200	240755	99999	BIGFORK 12 S	198302	117	HI	1		0		0.01	Inch
3200	240755	99999	BIGFORK 12 S	198302	217	HI	0		R		0	Inch
3200	240755	99999	BIGFORK 12 S	198302	317	HI	0		R		0	Inch
3200	240755	99999	BIGFORK 12 S	198302	417	HI	0		R		0	Inch
3200	240755	99999	BIGFORK 12 S	198302	517	HI	0		R		0	Inch
3200	240755	99999	BIGFORK 12 S	198302	699	HI	-99999	M			-99999	Inch
3200	240755	99999	BIGFORK 12 S	198302	717	HI	22		0		0.22	Inch
3200	240755	99999	BIGFORK 12 S	198302	817	HI	0		R		0	Inch
3200	240755	99999	BIGFORK 12 S	198302	917	HI	3		0		0.03	Inch
3200	240755	99999	BIGFORK 12 S	198302	1017	HI	2		0		0.02	Inch
3200	240755	99999	BIGFORK 12 S	198302	1117	HI	0		R		0	Inch
3200	240755	99999	BIGFORK 12 S	198302	1217	HI	0		S		0	Inch
3200	240755	99999	BIGFORK 12 S	198302	1317	HI	0		S		0	Inch
3200	240755	99999	BIGFORK 12 S	198302	1417	HI	0		R		0	Inch
3200	240755	99999	BIGFORK 12 S	198302	1517	HI	2		0		0.02	Inch
3200	240755	99999	BIGFORK 12 S	198302	1617	HI	25		0		0.25	Inch
3200	240755	99999	BIGFORK 12 S	198302	1717	HI	3		0		0.03	Inch
3200	240755	99999	BIGFORK 12 S	198302	1817	HI	50		0		0.5	Inch
3200	240755	99999	BIGFORK 12 S	198302	1917	HI	16		0		0.16	Inch
3200	240755	99999	BIGFORK 12 S	198302	2017	HI	0	T	0		0	Inch
3200	240755	99999	BIGFORK 12 S	198302	2199	HI	-99999	M			-99999	Inch
3200	240755	99999	BIGFORK 12 S	198302	2217	HI	5		0		0.05	Inch
3200	240755	99999	BIGFORK 12 S	198302	2317	HI	0		R		0	Inch
3200	240755	99999	BIGFORK 12 S	198302	2417	HI	0		R		0	Inch
3200	240755	99999	BIGFORK 12 S	198302	2599	HI	-99999	M			-99999	Inch
3200	240755	99999	BIGFORK 12 S	198302	2699	HI	-99999	M			-99999	Inch
3200	240755	99999	BIGFORK 12 S	198302	2799	HI	-99999	M			-99999	Inch
3200	240755	99999	BIGFORK 12 S	198302	2817	HI	9		0		0.09	Inch
3200	240755	99999	BIGFORK 12 S	198303	117	HI	16		0		0.16	Inch
3200	240755	99999	BIGFORK 12 S	198303	217	HI	32		0		0.32	Inch
3200	240755	99999	BIGFORK 12 S	198303	317	HI	0	T	0		0	Inch
3200	240755	99999	BIGFORK 12 S	198303	417	HI	0	T	0		0	Inch
3200	240755	99999	BIGFORK 12 S	198303	517	HI	99999	S	0		99999	Inch
3200	240755	99999	BIGFORK 12 S	198303	699	HI	-99999	M			-99999	Inch
3200	240755	99999	BIGFORK 12 S	198303	717	HI	42	A	0		0.42	Inch
3200	240755	99999	BIGFORK 12 S	198303	817	HI	0		R		0	Inch
3200	240755	99999	BIGFORK 12 S	198303	917	HI	5		0		0.05	Inch
3200	240755	99999	BIGFORK 12 S	198303	1017	HI	0	T	0		0	Inch
3200	240755	99999	BIGFORK 12 S	198303	1117	HI	0		R		0	Inch
3200	240755	99999	BIGFORK 12 S	198303	1217	HI	52		0		0.52	Inch
3200	240755	99999	BIGFORK 12 S	198303	1317	HI	14		0		0.14	Inch
3200	240755	99999	BIGFORK 12 S	198303	1417	HI	1		0		0.01	Inch
3200	240755	99999	BIGFORK 12 S	198303	1517	HI	0	T	0		0	Inch
3200	240755	99999	BIGFORK 12 S	198303	1617	HI	0		R		0	Inch
3200	240755	99999	BIGFORK 12 S	198303	1717	HI	0		R		0	Inch
3200	240755	99999	BIGFORK 12 S	198303	1817	HI	0		R		0	Inch
3200	240755	99999	BIGFORK 12 S	198303	1917	HI	0		R		0	Inch
3200	240755	99999	BIGFORK 12 S	198303	2017	HI	0		R		0	Inch
3200	240755	99999	BIGFORK 12 S	198303	2117	HI	0		R		0	Inch
3200	240755	99999	BIGFORK 12 S	198303	2217	HI	0		R		0	Inch
3200	240755	99999	BIGFORK 12 S	198303	2317	HI	99999	S	0		99999	Inch
3200	240755	99999	BIGFORK 12 S	198303	2417	HI	32	A	0		0.32	Inch
3200	240755	99999	BIGFORK 12 S	198303	2517	HI	0		R		0	Inch
3200	240755	99999	BIGFORK 12 S	198303	2617	HI	0		R		0	Inch
3200	240755	99999	BIGFORK 12 S	198303	2717	HI	0		R		0	Inch
3200	240755	99999	BIGFORK 12 S	198303	2817	HI	2		0		0.02	Inch
3200	240755	99999	BIGFORK 12 S	198303	2917	HI	0		R		0	Inch
3200	240755	99999	BIGFORK 12 S	198303	3017	HI	99999	S	0		99999	Inch
3200	240755	99999	BIGFORK 12 S	198303	3117	HI	37	A	0		0.37	Inch
3200	240755	99999	BIGFORK 12 S	198304	199	HI	-99999	M			-99999	Inch
3200	240755	99999	BIGFORK 12 S	198304	217	HI	38		0		0.38	Inch
3200	240755	99999	BIGFORK 12 S	198304	317	HI	0		R		0	Inch
3200	240755	99999	BIGFORK 12 S	198304	417	HI	0		R		0	Inch
3200	240755	99999	BIGFORK 12 S	198304	517	HI	0		R		0	Inch
3200	240755	99999	BIGFORK 12 S	198304	617	HI	0		0		0	Inch
3200	240755	99999	BIGFORK 12 S	198304	717	HI	0		0		0	Inch
3200	240755	99999	BIGFORK 12 S	198304	817	HI	0		0		0	Inch
3200	240755	99999	BIGFORK 12 S	198304	917	HI	0		R		0	Inch
3200	240755	99999	BIGFORK 12 S	198304	1017	HI	22		0		0.22	Inch
3200	240755	99999	BIGFORK 12 S	198304	1117	HI	0		R		0	Inch
3200	240755	99999	BIGFORK 12 S	198304	1217	HI	0		R		0	Inch
3200	240755	99999	BIGFORK 12 S	198304	1317	HI	0		R		0	Inch
3200	240755	99999	BIGFORK 12 S	198304	1417	HI	0		R		0	Inch
3200	240755	99999	BIGFORK 12 S	198304	1517	HI	0		R		0	Inch
3200	240755	99999	BIGFORK 12 S	198304	1617	HI	0		R		0	Inch
3200	240755	99999	BIGFORK 12 S	198304	1717	HI	0		R		0	Inch
3200	240755	99999	BIGFORK 12 S	198304	1817	HI	0		R		0	Inch
3200	240755	99999	BIGFORK 12 S	198304	1917	HI	0		R		0	Inch
3200	240755	99999	BIGFORK 12 S	198304	2017	HI	0		R		0	Inch
3200	240755	99999	BIGFORK 12 S	198304	2117	HI	0		0		0	Inch
3200	240755	99999	BIGFORK 12 S	198304	2217	HI	0		R		0	Inch
3200	240755	99999	BIGFORK 12 S	198304	2317	HI	0		R		0	Inch
3200	240755	99999	BIGFORK 12 S	198304	2417	HI	72		0		0.72	Inch
3200	240755	99999	BIGFORK 12 S	198304	2517	HI	28		0		0.28	Inch
3200	240755	99999	BIGFORK 12 S	198304	2617	HI	23		0		0.23	Inch
3200	240755	99999	BIGFORK 12 S	198304	2717	HI	9		0		0.09	Inch
3200	240755	99999	BIGFORK 12 S	198304	2817	HI	1		0		0.01	Inch
3200	240755	99999	BIGFORK 12 S	198304	2917	HI	0		R		0	Inch
3200	240755	99999	BIGFORK 12 S	198304	3017	HI	0		R		0	Inch
3200	240755	99999	BIGFORK 12 S	198305	117	HI	0		R		0	Inch
3200	240755	99999	BIGFORK 12 S	198305	217	HI	0		R		0	Inch
3200	240755	99999	BIGFORK 12 S	198305	317	HI	3		0		0.03	Inch
3200	240755	99999	BIGFORK 12 S	198305	417	HI	0		R		0	Inch
3200	240755	99999	BIGFORK 12 S	198305	517	HI	0		R		0	Inch
3200	240755	99999	BIGFORK 12 S	198305	617	HI	51		0		0.51	Inch
3200	240755	99999	BIGFORK 12 S	198305	717	HI	2		0		0.02	Inch
3200	240755	99999	BIGFORK 12 S	198305	817	HI	15		0		0.15	Inch
3200	240755	99999	BIGFORK 12 S	198305	917	HI	67		S		0.67	Inch
3200	240755	99999	BIGFORK 12 S	198305	1017	HI	0		R		0	Inch
3200	240755	99999	BIGFORK 12 S	198305	1117	HI	0		R		0	Inch
3200	240755	99999	BIGFORK 12 S	198305	1217	HI	0		0		0	Inch
3200	240755	99999	BIGFORK 12 S	198305	1317	HI	0		0		0	Inch
3200	240755	99999	BIGFORK 12 S	198305	1417	HI	0		R		0	Inch
3200	240755	99999	BIGFORK 12 S	198305	1517	HI	2		0		0.02	Inch
3200	240755	99999	BIGFORK 12 S	198305	1617	HI	0	T	0		0	Inch
3200	240755	99999	BIGFORK 12 S	198305	1717	HI	14		0		0.14	Inch
3200	240755	99999	BIGFORK 12 S	198305	1817	HI	32		0		0.32	Inch
3200	240755	99999	BIGFORK 12 S	198305	1917	HI	0		R		0	Inch
3200	240755	99999	BIGFORK 12 S	198305	2017	HI	0		R		0	Inch
3200	240755	99999	BIGFORK 12 S	198305	2117	HI	0		R		0	Inch
3200	240755	99999	BIGFORK 12 S	198305	2217	HI	0		R		0	Inch
3200	240755	99999	BIGFORK 12 S	198305	2317	HI	0		R		0	Inch
3200	240755	99999	BIGFORK 12 S	198305	2417	HI	0		R		0	Inch
3200	240755	99999	BIGFORK 12 S	198305	2517	HI	0		R		0	Inch
3200	240755	99999	BIGFORK 12 S	198305	2617	HI	0		R		0	Inch
3200	240755	99999	BIGFORK 12 S	198305	2717	HI	0		R		0	Inch
3200	240755	99999	BIGFORK 12 S	198305	2817	HI	0		R		0	Inch
3200	240755	99999	BIGFORK 12 S	198305	2917	HI	0		R		0	Inch
3200	240755	99999	BIGFORK 12 S	198305	3017	HI	0		R		0	Inch
3200	240755	99999	BIGFORK 12 S	198305	3117	HI	0		R		0	Inch
3200	240755	99999	BIGFORK 12 S	198306	117	HI	0		R		0	Inch
3200	240755	99999	BIGFORK 12 S	198306	217	HI	0	T	0		0	Inch
3200	240755	99999	BIGFORK 12 S	198306	317	HI	14		0		0.14	Inch
3200	240755	99999	BIGFORK 12 S	198306	417	HI	0		R		0	Inch
3200	240755	99999	BIGFORK 12 S	198306	517	HI	0	T	0		0	Inch
3200	240755	99999	BIGFORK 12 S	198306	617	HI	0		R		0	Inch
3200	240755	99999	BIGFORK 12 S	198306	717	HI	0		R		0	Inch
3200	240755	99999	BIGFORK 12 S	198306	817	HI	0		R		0	Inch
3200	240755	99999	BIGFORK 12 S	198306	917	HI	0		R		0	Inch
3200	240755	99999	BIGFORK 12 S	198306	1017	HI	24		0		0.24	Inch
3200	240755	99999	BIGFORK 12 S	198306	1117	HI	27		0		0.27	Inch
3200	240755	99999	BIGFORK 12 S	198306	1217	HI	25		0		0.25	Inch
3200	240755	99999	BIGFORK 12 S	198306	1317	HI	5		0		0.05	Inch
3200	240755	99999	BIGFORK 12 S	198306	1417	HI	0		R		0	Inch
3200	240755	99999	BIGFORK 12 S	198306	1517	HI	88		0		0.88	Inch
3200	240755	99999	BIGFORK 12 S	198306	1617	HI	10		0		0.1	Inch
3200	240755	99999	BIGFORK 12 S	198306	1717	HI	0		R		0	Inch
3200	240755	99999	BIGFORK 12 S	198306	1817	HI	98		0		0.98	Inch
3200	240755	99999	BIGFORK 12 S	198306	1917	HI	60		0		0.6	Inch
3200	240755	99999	BIGFORK 12 S	198306	2017	HI	0	T	0		0	Inch
3200	240755	99999	BIGFORK 12 S	198306	2117	HI	0		R		0	Inch
3200	240755	99999	BIGFORK 12 S	198306	2217	HI	0		R		0	Inch
3200	240755	99999	BIGFORK 12 S	198306	2317	HI	11		0		0.11	Inch
3200	240755	99999	BIGFORK 12 S	198306	2417	HI	0		R		0	Inch
[truncated: 8,319 more rows]

## Sheet: Aerosol Index
	Date	Aerosol Index		Missing data = 999.9
	1979-01-01	-0.5
	1979-01-02	-0.1
	1979-01-03	-0.7
	1979-01-04	999.9
	1979-01-05	-0.5
	1979-01-06	-0.4
	1979-01-07	-0.6
	1979-01-09	-1
	1979-01-10	-0.5
	1979-01-11	-0.6
	1979-01-12	-0.7
	1979-01-13	-0.4
	1979-01-14	-0.2
	1979-01-15	-0.5
	1979-01-16	999.9
	1979-01-17	-0.4
	1979-01-18	999.9
	1979-01-19	-0.4
	1979-01-21	-0.3
	1979-01-22	-0.4
	1979-01-23	-0.2
	1979-01-24	-0.5
	1979-01-25	-0.4
	1979-01-26	-0.5
	1979-01-27	-1
	1979-01-28	-0.7
	1979-01-29	-0.5
	1979-01-30	-0.6
	1979-01-31	-0.2
	1979-02-01	-0.4
	1979-02-02	-0.2
	1979-02-03	-0.5
	1979-02-04	-0.4
	1979-02-05	-0.4
	1979-02-06	0
	1979-02-07	-0.3
	1979-02-08	-0.5
	1979-02-09	999.9
	1979-02-10	-0.4
	1979-02-11	-0.2
	1979-02-12	0.1
	1979-02-13	999.9
	1979-02-14	-0.8
	1979-02-15	-0.6
	1979-02-16	-0.3
	1979-02-17	-0.1
	1979-02-18	0
	1979-02-19	-0.5
	1979-02-20	-0.5
	1979-02-22	-0.6
	1979-02-23	-0.2
	1979-02-24	-0.5
	1979-02-25	999.9
	1979-02-26	999.9
	1979-02-27	0.1
	1979-02-28	-0.4
	1979-03-01	0
	1979-03-02	-0.1
	1979-03-03	0.6
	1979-03-04	-0.3
	1979-03-06	-0.3
	1979-03-07	-0.3
	1979-03-08	-0.2
	1979-03-09	999.9
	1979-03-10	0.7
	1979-03-11	0.3
	1979-03-12	0
	1979-03-13	0.2
	1979-03-14	0.5
	1979-03-15	1.2
	1979-03-16	0
	1979-03-17	999.9
	1979-03-18	0
	1979-03-19	0
	1979-03-20	0.2
	1979-03-21	999.9
	1979-03-22	-0.1
	1979-03-23	-0.3
	1979-03-24	0.2
	1979-03-25	0
	1979-03-26	0
	1979-03-27	-0.3
	1979-03-28	-0.3
	1979-03-29	999.9
	1979-03-30	0
	1979-03-31	0
	1979-04-01	0
	1979-04-02	-0.1
	1979-04-03	0.1
	1979-04-04	0.1
	1979-04-05	0.2
	1979-04-06	0.9
	1979-04-07	0.5
	1979-04-08	0.4
	1979-04-09	-0.2
	1979-04-10	0
	1979-04-11	0.1
	1979-04-12	0.6
	1979-04-13	0.2
	1979-04-15	0.6
	1979-04-16	0.6
	1979-04-17	0.8
	1979-04-18	0.2
	1979-04-19	0.1
	1979-04-20	0.3
	1979-04-21	0.4
	1979-04-22	999.9
	1979-04-23	0.1
	1979-04-24	0.2
	1979-04-25	0.7
	1979-04-27	1.2
	1979-04-28	1.4
	1979-04-29	1
	1979-04-30	0.7
	1979-05-01	0.2
	1979-05-02	0.2
	1979-05-03	0.7
	1979-05-04	999.9
	1979-05-05	0
	1979-05-06	-0.1
	1979-05-07	0
	1979-05-08	999.9
	1979-05-09	0
	1979-05-10	999.9
	1979-05-11	0.3
	1979-05-12	999.9
	1979-05-13	0.4
	1979-05-14	0.4
	1979-05-15	0.9
	1979-05-16	0
	1979-05-17	0.1
	1979-05-18	0.1
	1979-05-19	0.2
	1979-05-20	999.9
	1979-05-21	0.7
	1979-05-22	0.7
	1979-05-23	0.4
	1979-05-24	0
	1979-05-25	0
	1979-05-26	999.9
	1979-05-27	0.8
	1979-05-29	0
	1979-05-30	0.3
	1979-05-31	0.3
	1979-06-01	999.9
	1979-06-02	0.3
	1979-06-03	0.1
	1979-06-04	0
	1979-06-05	999.9
	1979-06-06	999.9
	1979-06-07	0.1
	1979-06-08	0.2
	1979-06-10	0
	1979-06-11	-0.4
	1979-06-12	0.1
	1979-06-19	999.9
	1979-06-20	0.2
	1979-06-22	-0.1
	1979-06-23	999.9
	1979-06-24	-0.2
	1979-06-25	999.9
	1979-06-26	-0.9
	1979-06-27	-0.3
	1979-06-28	-0.1
	1979-06-29	-0.6
	1979-06-30	0.1
	1979-07-01	-0.2
	1979-07-02	0.2
	1979-07-03	0.1
	1979-07-04	-0.3
	1979-07-05	-0.2
	1979-07-06	-0.4
	1979-07-07	-0.3
	1979-07-08	0.2
	1979-07-09	-0.1
	1979-07-10	0
	1979-07-11	0.2
	1979-07-12	0.2
	1979-07-13	0
	1979-07-14	0.2
	1979-07-15	-0.2
	1979-07-16	-0.5
	1979-07-17	-0.5
	1979-07-18	-0.4
	1979-07-19	-0.8
	1979-07-20	-0.4
	1979-07-21	-0.4
	1979-07-22	-0.7
	1979-07-23	-0.5
	1979-07-24	-0.6
	1979-07-25	0.2
	1979-07-26	-0.5
	1979-07-27	-0.2
	1979-07-28	0
	1979-07-29	-0.7
	1979-07-30	0
	1979-07-31	-0.1
	1979-08-01	0
	1979-08-02	-0.2
	1979-08-03	-0.1
	1979-08-04	999.9
	1979-08-05	0.2
	1979-08-06	-0.2
	1979-08-07	-0.1
	1979-08-08	-0.7
	1979-08-09	-0.1
	1979-08-10	0
	1979-08-11	0
	1979-08-12	-0.6
	1979-08-13	0.3
	1979-08-14	0
	1979-08-15	0
	1979-08-16	-0.1
	1979-08-17	-0.1
	1979-08-18	0
	1979-08-19	0
	1979-08-20	-0.3
	1979-08-21	-0.2
	1979-08-22	-0.2
	1979-08-23	-0.4
	1979-08-24	999.9
	1979-08-25	-0.4
	1979-08-26	0
	1979-08-27	999.9
	1979-08-28	-0.4
	1979-08-29	-0.1
	1979-08-30	-0.6
	1979-08-31	-0.4
	1979-09-01	0
	1979-09-02	-0.5
	1979-09-03	-0.3
	1979-09-04	0
	1979-09-05	-0.1
	1979-09-06	-0.5
	1979-09-07	0
	1979-09-08	-0.4
	1979-09-09	999.9
	1979-09-10	-0.1
	1979-09-11	-0.3
	1979-09-12	-0.4
	1979-09-13	-0.3
	1979-09-14	-0.3
	1979-09-15	-0.1
	1979-09-16	999.9
	1979-09-17	-0.1
	1979-09-18	0
	1979-09-19	-0.3
	1979-09-20	-0.3
	1979-09-21	-0.4
	1979-09-22	0
	1979-09-23	0
	1979-09-24	-0.1
	1979-09-25	-0.5
	1979-09-26	-0.4
	1979-09-27	0
	1979-09-28	-0.3
	1979-09-29	0
	1979-09-30	-0.4
	1979-10-01	-0.8
	1979-10-02	-0.4
	1979-10-03	0
	1979-10-04	0
	1979-10-05	0
	1979-10-06	999.9
	1979-10-07	-0.6
	1979-10-08	-0.4
	1979-10-09	-0.1
	1979-10-10	0.1
	1979-10-11	999.9
	1979-10-12	0
	1979-10-13	0.1
	1979-10-14	-0.4
	1979-10-15	0
	1979-10-16	0
	1979-10-17	-0.2
	1979-10-18	-0.1
	1979-10-19	-0.1
	1979-10-20	0
	1979-10-21	0
	1979-10-22	0
	1979-10-23	-0.1
	1979-10-24	0.4
	1979-10-25	-0.1
	1979-10-26	0
	1979-10-27	-0.1
	1979-10-28	0
	1979-10-29	0
	1979-10-30	0
	1979-10-31	0
	1979-11-01	-0.3
	1979-11-02	0
	1979-11-03	-0.3
	1979-11-04	-0.3
	1979-11-05	-0.2
	1979-11-06	0
	1979-11-07	-0.5
	1979-11-08	999.9
	1979-11-09	-0.7
	1979-11-10	-0.2
	1979-11-11	-0.4
	1979-11-12	-0.4
	1979-11-13	-1
	1979-11-14	-0.9
	1979-11-15	-1.1
	1979-11-16	0
	1979-11-17	0.3
	1979-11-18	-0.1
	1979-11-19	-0.3
	1979-11-20	-1.1
	1979-11-21	-1
	1979-11-22	-1.6
	1979-11-23	-0.5
	1979-11-24	-0.1
	1979-11-25	-0.7
	1979-11-26	-0.5
	1979-11-27	-0.2
	1979-11-28	-0.6
	1979-11-29	-0.9
	1979-11-30	999.9
	1979-12-01	-1
	1979-12-02	-1
	1979-12-03	0
	1979-12-04	0
	1979-12-05	-0.5
	1979-12-06	-0.7
	1979-12-07	-0.3
	1979-12-08	-0.2
	1979-12-09	0
	1979-12-10	-0.2
	1979-12-11	999.9
	1979-12-12	-0.1
	1979-12-13	-0.4
	1979-12-14	-0.2
	1979-12-15	-0.7
	1979-12-16	-0.8
	1979-12-17	-0.3
	1979-12-18	-0.8
	1979-12-19	-0.6
	1979-12-20	-0.1
	1979-12-21	-0.3
	1979-12-22	999.9
	1979-12-23	999.9
	1979-12-24	-0.1
	1979-12-25	0
	1979-12-26	-0.4
	1979-12-27	-1
	1979-12-28	-0.6
	1979-12-29	-0.7
	1979-12-30	-0.9
	1979-12-31	0.2
	1980-01-01	-0.4
	1980-01-02	-0.6
	1980-01-03	-0.6
	1980-01-04	-0.2
	1980-01-05	-0.3
	1980-01-06	-0.4
	1980-01-07	-0.8
	1980-01-08	-0.6
	1980-01-09	-0.8
	1980-01-10	-0.1
	1980-01-11	0
	1980-01-12	-0.3
	1980-01-13	-0.6
	1980-01-14	999.9
	1980-01-15	-0.5
	1980-01-16	-0.1
	1980-01-17	-0.1
	1980-01-18	-0.7
	1980-01-19	-0.7
	1980-01-20	-1
	1980-01-21	-0.9
	1980-01-22	-0.5
	1980-01-23	-0.1
	1980-01-24	-0.7
	1980-01-25	-0.5
	1980-01-26	-0.3
	1980-01-27	-0.4
	1980-01-28	-0.5
	1980-01-29	-0.5
	1980-01-30	-0.5
	1980-01-31	-0.6
	1980-02-01	-0.4
	1980-02-02	0.1
	1980-02-03	-0.4
	1980-02-04	-0.6
	1980-02-05	999.9
	1980-02-06	-0.2
	1980-02-07	-0.3
	1980-02-08	-0.3
	1980-02-09	-0.4
	1980-02-10	-0.7
	1980-02-11	-0.3
	1980-02-12	-0.3
	1980-02-13	-0.6
	1980-02-14	-0.6
	1980-02-15	-0.7
	1980-02-16	-0.4
	1980-02-17	-0.5
	1980-02-18	-0.2
	1980-02-19	-0.3
	1980-02-20	999.9
	1980-02-21	-0.4
	1980-02-22	-0.7
	1980-02-23	-0.2
	1980-02-24	-0.3
	1980-02-25	-0.6
	1980-02-26	-0.4
	1980-02-27	-0.3
	1980-02-28	-0.3
	1980-02-29	-0.4
	1980-03-01	-0.1
	1980-03-02	-0.3
	1980-03-03	-0.5
	1980-03-04	-0.2
	1980-03-05	-0.1
	1980-03-06	-0.5
	1980-03-07	-0.3
	1980-03-08	-0.2
	1980-03-09	0
	1980-03-10	-0.1
	1980-03-11	0
	1980-03-12	-0.1
	1980-03-13	-0.1
	1980-03-14	0
	1980-03-15	-0.1
	1980-03-16	-0.1
	1980-03-17	-0.1
	1980-03-18	-0.1
	1980-03-19	-0.3
	1980-03-20	999.9
	1980-03-21	-0.3
	1980-03-22	0
	1980-03-23	0.1
	1980-03-24	-0.1
	1980-03-25	0.2
	1980-03-26	0
	1980-03-27	0
	1980-03-28	0
	1980-03-29	0
	1980-03-30	-0.2
	1980-03-31	0
	1980-04-01	0
	1980-04-02	999.9
	1980-04-03	-0.1
	1980-04-04	0.5
	1980-04-05	0.3
	1980-04-06	0.6
	1980-04-07	0
	1980-04-08	0.3
	1980-04-09	0
	1980-04-10	0
	1980-04-11	0.5
	1980-04-12	0.6
	1980-04-13	0.4
	1980-04-14	0.2
	1980-04-15	0
	1980-04-16	1.5
	1980-04-17	1.1
	1980-04-18	0.7
	1980-04-19	0.3
	1980-04-20	1
	1980-04-21	0.7
	1980-04-22	0
	1980-04-23	0.3
	1980-04-24	-0.2
	1980-04-25	0
	1980-04-26	0.5
	1980-04-27	0.6
	1980-04-28	999.9
	1980-04-29	-0.2
	1980-04-30	-0.1
	1980-05-01	0.2
	1980-05-02	0.3
	1980-05-03	0.2
	1980-05-04	0.1
	1980-05-05	-0.1
	1980-05-06	0
	1980-05-07	0
	1980-05-08	0.3
	1980-05-09	-0.2
	1980-05-10	-0.3
	1980-05-11	-0.2
	1980-05-12	0.1
	1980-05-13	0.4
	1980-05-14	0.1
	1980-05-15	-0.1
	1980-05-16	-0.1
	1980-05-17	0.3
	1980-05-18	0
	1980-05-19	1.6
	1980-05-20	0.4
	1980-05-21	999.9
	1980-05-22	-0.7
	1980-05-23	0
	1980-05-24	0.1
	1980-05-25	0.2
	1980-05-26	0.2
	1980-05-27	0.1
	1980-05-28	0.3
	1980-05-29	0.2
	1980-05-30	0
	1980-05-31	999.9
	1980-06-01	0
	1980-06-02	0
	1980-06-03	0
	1980-06-04	0.5
	1980-06-05	0.2
	1980-06-06	0
	1980-06-07	0
	1980-06-08	-0.4
	1980-06-09	-0.2
	1980-06-10	-0.3
	1980-06-11	0
	1980-06-12	0
	1980-06-13	-0.1
	1980-06-14	0.3
	1980-06-15	0
	1980-06-16	-0.4
	1980-06-17	-0.1
	1980-06-18	-0.4
	1980-06-19	-0.4
	1980-06-20	-0.4
	1980-06-21	-0.2
	1980-06-22	-0.7
	1980-06-23	-0.1
	1980-06-24	-0.5
	1980-06-25	0
	1980-06-26	0.2
	1980-06-27	0.1
	1980-06-28	-0.1
	1980-06-29	-0.6
	1980-06-30	-0.3
	1980-07-01	-0.1
	1980-07-02	-0.7
	1980-07-03	-0.1
	1980-07-04	0.3
	1980-07-05	-0.2
	1980-07-06	0.1
	1980-07-07	-0.1
	1980-07-08	-0.5
	1980-07-09	-0.3
	1980-07-10	-0.6
	1980-07-11	-0.1
	1980-07-12	-0.2
	1980-07-13	0
	1980-07-14	0.1
	1980-07-15	0.2
	1980-07-16	-0.2
	1980-07-17	0
	1980-07-18	-0.3
	1980-07-19	0.2
	1980-07-20	-0.1
	1980-07-21	-0.2
	1980-07-22	-0.2
	1980-07-23	-0.3
	1980-07-24	-0.3
	1980-07-25	-0.6
	1980-07-26	-0.4
	1980-07-27	-0.5
	1980-07-28	0
	1980-07-29	0
	1980-07-30	-0.1
	1980-07-31	-0.3
	1980-08-01	-0.3
	1980-08-02	-0.6
	1980-08-03	0.1
	1980-08-04	0
	1980-08-05	0
	1980-08-06	0
	1980-08-07	-0.1
	1980-08-08	-0.3
	1980-08-09	0.6
	1980-08-10	-0.7
	1980-08-11	-0.2
	1980-08-12	-0.4
	1980-08-13	0
	1980-08-14	-0.8
	1980-08-15	-0.4
	1980-08-16	999.9
	1980-08-17	-0.1
	1980-08-18	-0.3
	1980-08-19	0
	1980-08-20	0
	1980-08-21	-0.5
	1980-08-22	-0.4
	1980-08-23	-0.7
	1980-08-24	-0.2
	1980-08-25	-0.2
	1980-08-26	-0.2
	1980-08-27	0
	1980-08-28	0
	1980-08-29	-0.5
	1980-08-30	-0.3
	1980-08-31	0
	1980-09-01	0.2
	1980-09-02	0
	1980-09-03	-0.2
	1980-09-04	-0.3
	1980-09-05	0
	1980-09-06	-0.6
	1980-09-07	-0.5
	1980-09-08	-0.5
	1980-09-09	-0.1
	1980-09-10	0
	1980-09-11	0.1
	1980-09-12	-0.5
	1980-09-13	0
	1980-09-14	-0.8
	1980-09-15	-0.2
	1980-09-16	0.1
	1980-09-17	-0.4
	1980-09-18	-0.1
	1980-09-19	-0.3
	1980-09-20	0.1
	1980-09-21	0
	1980-09-22	0
	1980-09-23	0
	1980-09-24	-0.2
	1980-09-25	-0.1
	1980-09-26	-0.6
	1980-09-27	-0.8
	1980-09-28	-0.5
	1980-09-29	-0.5
	1980-09-30	-0.3
	1980-10-01	-0.2
	1980-10-02	0
	1980-10-03	0
	1980-10-04	-0.2
	1980-10-05	-0.4
	1980-10-06	-0.2
	1980-10-07	-0.1
	1980-10-08	-0.1
	1980-10-09	-0.1
	1980-10-10	-0.1
	1980-10-11	-0.3
	1980-10-12	0
	1980-10-13	0
	1980-10-14	0.3
	1980-10-15	-0.4
	1980-10-16	-0.3
	1980-10-17	-0.4
	1980-10-18	-0.3
	1980-10-19	-0.2
	1980-10-20	-0.3
	1980-10-21	-0.2
	1980-10-22	0
	1980-10-23	-0.5
	1980-10-24	-0.4
	1980-10-25	-0.1
	1980-10-26	-0.2
	1980-10-27	-0.3
	1980-10-28	-0.7
	1980-10-29	-0.5
	1980-10-30	-0.2
	1980-10-31	-0.4
	1980-11-01	-0.3
	1980-11-02	-0.1
	1980-11-03	-0.4
	1980-11-04	-0.1
	1980-11-05	-0.5
	1980-11-06	0
	1980-11-07	-0.4
	1980-11-08	-0.4
	1980-11-09	-0.4
	1980-11-10	-0.2
	1980-11-11	-0.2
	1980-11-12	-0.7
	1980-11-13	-0.6
	1980-11-14	-0.8
	1980-11-15	-0.5
	1980-11-16	-0.4
	1980-11-17	-0.4
	1980-11-18	-0.8
	1980-11-19	-0.5
	1980-11-20	-0.7
	1980-11-21	0
	1980-11-22	-0.9
	1980-11-23	-0.8
	1980-11-24	-0.9
	1980-11-25	-0.6
	1980-11-26	-1.3
	1980-11-27	-0.3
	1980-11-28	-1
	1980-11-29	-0.8
	1980-11-30	-0.3
	1980-12-01	-0.6
	1980-12-02	0
	1980-12-03	-0.3
	1980-12-04	-0.5
	1980-12-05	-0.7
	1980-12-06	-0.6
	1980-12-07	-0.5
	1980-12-08	-0.2
	1980-12-09	-0.6
	1980-12-10	-0.6
	1980-12-11	-0.6
	1980-12-12	-0.4
	1980-12-13	-0.6
	1980-12-14	-0.2
	1980-12-15	-0.8
	1980-12-16	-0.9
	1980-12-17	-1
	1980-12-18	-0.2
	1980-12-19	0.2
	1980-12-20	-0.9
	1980-12-21	-0.8
	1980-12-22	-0.7
	1980-12-23	-0.2
	1980-12-24	-0.2
	1980-12-25	-0.2
	1980-12-26	-0.8
	1980-12-27	-0.6
	1980-12-28	-1
	1980-12-29	-0.5
	1980-12-30	0.1
	1980-12-31	-0.6
	1981-01-01	-0.9
	1981-01-02	-0.9
	1981-01-03	-0.7
	1981-01-04	-0.7
	1981-01-05	-0.7
	1981-01-06	-0.7
	1981-01-07	-1
	1981-01-08	-1
	1981-01-09	-0.5
	1981-01-10	-1.3
	1981-01-11	-0.7
	1981-01-12	-0.7
	1981-01-13	-1.2
	1981-01-14	-1.1
	1981-01-15	-0.3
	1981-01-16	-0.8
	1981-01-17	-0.8
	1981-01-18	-1
	1981-01-19	-1.1
	1981-01-20	-1.2
	1981-01-21	0
	1981-01-22	-0.2
	1981-01-23	-0.7
	1981-01-24	-0.6
	1981-01-25	-0.6
	1981-01-26	-0.3
	1981-01-27	-0.6
	1981-01-28	-0.7
	1981-01-29	-0.8
	1981-01-30	-0.8
	1981-01-31	-0.8
	1981-02-01	-0.6
	1981-02-02	-0.5
	1981-02-03	-0.9
	1981-02-04	-0.5
	1981-02-05	-0.7
	1981-02-06	-0.6
	1981-02-07	0.2
	1981-02-08	-0.6
	1981-02-09	-0.5
	1981-02-10	-0.3
	1981-02-11	-0.6
	1981-02-12	-0.2
	1981-02-13	-0.6
	1981-02-14	-0.3
	1981-02-15	-0.9
	1981-02-16	-0.5
	1981-02-17	-0.7
	1981-02-18	-0.5
	1981-02-19	-0.5
	1981-02-20	-0.8
	1981-02-21	-0.7
	1981-02-22	-0.6
	1981-02-23	-0.6
	1981-02-24	-0.6
	1981-02-25	0
	1981-02-26	-0.5
	1981-02-27	-0.5
	1981-02-28	-0.6
	1981-03-01	-0.2
	1981-03-02	-0.1
	1981-03-03	0
	1981-03-04	-0.1
	1981-03-05	0
	1981-03-06	-0.2
	1981-03-07	-0.1
	1981-03-08	-0.3
	1981-03-09	0
	1981-03-10	-0.1
	1981-03-11	-0.6
	1981-03-12	-0.3
	1981-03-13	-0.2
	1981-03-14	0.1
	1981-03-15	-0.1
	1981-03-16	-0.2
	1981-03-17	-0.3
	1981-03-18	-0.1
	1981-03-19	0
	1981-03-20	0
	1981-03-21	-0.1
	1981-03-22	-0.2
	1981-03-23	-0.6
	1981-03-24	-0.3
	1981-03-25	-0.2
	1981-03-26	-0.2
	1981-03-27	-0.1
	1981-03-28	-0.3
	1981-03-29	0
	1981-03-30	-0.2
	1981-03-31	0.1
	1981-04-01	-0.1
	1981-04-02	-0.3
	1981-04-03	-0.1
	1981-04-04	0
	1981-04-05	0.2
	1981-04-06	0
	1981-04-07	0
	1981-04-08	0
	1981-04-09	0.1
	1981-04-10	0.2
	1981-04-11	0
	1981-04-12	0.1
	1981-04-13	0.3
	1981-04-14	0.3
	1981-04-15	0.2
	1981-04-16	0.3
	1981-04-17	1
	1981-04-18	0.9
	1981-04-19	0
	1981-04-20	0
	1981-04-21	0.4
	1981-04-22	0.1
	1981-04-23	0
	1981-04-24	0.1
	1981-04-25	-0.1
	1981-04-26	0
	1981-04-27	0.7
	1981-04-28	-0.1
	1981-04-29	0.4
	1981-04-30	0
	1981-05-01	0
	1981-05-02	0.4
	1981-05-03	0.8
	1981-05-04	0.2
	1981-05-05	0.1
	1981-05-06	0.1
	1981-05-07	0.2
	1981-05-08	0
	1981-05-09	0
	1981-05-10	0
	1981-05-11	-0.1
	1981-05-12	0
	1981-05-13	0.3
	1981-05-14	0.3
	1981-05-15	0.1
	1981-05-16	0
	1981-05-17	0
	1981-05-18	0.1
	1981-05-19	0
	1981-05-20	0.4
	1981-05-21	0.3
	1981-05-22	0.5
	1981-05-23	0
	1981-05-24	0
	1981-05-25	0.3
	1981-05-26	999.9
	1981-05-27	0.2
	1981-05-28	0
	1981-05-29	-0.2
	1981-05-30	-0.1
	1981-05-31	0.3
	1981-06-01	0.2
	1981-06-02	0
	1981-06-03	0.2
	1981-06-04	0.4
	1981-06-05	-0.1
	1981-06-06	0.2
	1981-06-07	0
	1981-06-08	0
	1981-06-09	0
	1981-06-10	0.7
	1981-06-11	0
	1981-06-12	0.3
	1981-06-13	0
	1981-06-14	-0.1
	1981-06-15	0.4
	1981-06-16	0
	1981-06-17	0.1
	1981-06-18	0.2
	1981-06-19	0.2
	1981-06-20	0
	1981-06-21	0.1
	1981-06-22	0.1
	1981-06-23	0
	1981-06-24	0
	1981-06-25	0
	1981-06-26	-0.5
	1981-06-27	-0.2
	1981-06-28	-0.2
	1981-06-29	-0.1
	1981-06-30	0
	1981-07-01	-0.6
	1981-07-02	-0.3
	1981-07-03	0
	1981-07-04	-0.1
	1981-07-05	-0.6
	1981-07-06	0
	1981-07-07	0
	1981-07-08	-0.1
	1981-07-09	-0.2
	1981-07-10	-0.2
	1981-07-11	-0.6
	1981-07-12	-0.6
	1981-07-13	-0.3
	1981-07-14	0
	1981-07-15	-0.5
	1981-07-16	-0.5
	1981-07-17	-0.7
	1981-07-18	-0.4
	1981-07-19	-0.2
	1981-07-20	-0.3
	1981-07-21	-0.3
	1981-07-22	-0.3
	1981-07-23	-0.2
	1981-07-24	-0.2
	1981-07-25	0
	1981-07-26	-0.2
	1981-07-27	-0.3
	1981-07-28	-0.4
	1981-07-29	-0.4
	1981-07-30	-0.1
	1981-07-31	-0.1
	1981-08-01	-0.3
	1981-08-02	0
	1981-08-03	-0.1
	1981-08-04	-0.5
	1981-08-05	-0.4
	1981-08-06	-0.5
	1981-08-07	-0.5
	1981-08-08	-0.4
	1981-08-09	-0.7
	1981-08-10	999.9
	1981-08-11	-0.5
	1981-08-12	-0.5
	1981-08-13	-0.8
	1981-08-14	-0.8
	1981-08-15	-1
	1981-08-16	-0.2
	1981-08-17	-0.8
	1981-08-18	-0.3
	1981-08-19	-0.1
	1981-08-20	-0.5
	1981-08-21	-0.5
	1981-08-22	-0.2
	1981-08-23	-0.3
	1981-08-24	-0.4
	1981-08-25	-0.4
	1981-08-26	-0.2
	1981-08-27	-0.1
	1981-08-28	999.9
	1981-08-29	-0.5
	1981-08-30	0
	1981-08-31	-0.4
	1981-09-01	-0.1
	1981-09-02	-0.1
	1981-09-03	-0.3
	1981-09-04	-0.7
	1981-09-05	-0.6
	1981-09-06	-0.2
	1981-09-07	-0.2
	1981-09-08	-0.3
	1981-09-09	-0.2
	1981-09-10	-0.2
	1981-09-11	-0.1
	1981-09-12	-0.2
	1981-09-13	-0.1
	1981-09-14	-0.5
	1981-09-15	-0.4
	1981-09-16	-0.2
	1981-09-17	-0.2
	1981-09-18	-0.1
	1981-09-19	0
	1981-09-20	-0.5
	1981-09-21	-0.1
	1981-09-22	-0.5
	1981-09-23	-0.6
	1981-09-24	-0.7
	1981-09-25	0
	1981-09-26	-0.5
	1981-09-27	0
	1981-09-28	-0.2
	1981-09-29	-0.1
	1981-09-30	-0.3
	1981-10-01	-0.6
	1981-10-02	0
	1981-10-03	0
	1981-10-04	0
	1981-10-05	-0.2
	1981-10-06	-0.3
	1981-10-07	-0.1
	1981-10-08	-0.3
	1981-10-09	-0.3
	1981-10-10	0
	1981-10-11	-0.3
	1981-10-12	-0.4
	1981-10-13	-0.4
	1981-10-14	-0.2
	1981-10-15	-0.5
	1981-10-16	0
	1981-10-17	-0.4
	1981-10-18	-0.5
	1981-10-19	-0.8
	1981-10-20	-0.3
	1981-10-21	-0.1
	1981-10-22	-0.7
	1981-10-23	-0.2
	1981-10-24	-0.3
	1981-10-25	-0.2
	1981-10-26	-0.3
	1981-10-27	0
	1981-10-28	-0.4
	1981-10-29	-0.1
	1981-10-30	-0.4
	1981-10-31	-0.3
	1981-11-01	-0.7
	1981-11-02	-0.2
	1981-11-03	-0.6
	1981-11-04	-0.3
	1981-11-05	-0.6
	1981-11-06	-0.4
	1981-11-07	0
	1981-11-08	-0.9
	1981-11-09	-1.6
	1981-11-10	-1.3
	1981-11-11	-1
	1981-11-12	-0.4
	1981-11-13	0
	1981-11-14	-0.2
	1981-11-15	-0.4
	1981-11-16	-1.1
	1981-11-17	-0.8
	1981-11-18	-0.2
	1981-11-19	-0.5
	1981-11-20	-0.8
	1981-11-21	-1
	1981-11-22	-0.6
	1981-11-23	-0.3
	1981-11-24	-0.2
	1981-11-25	-0.6
	1981-11-26	-0.8
	1981-11-27	-0.3
	1981-11-28	-0.8
	1981-11-29	-1
	1981-11-30	-0.5
	1981-12-01	-0.4
	1981-12-02	-1
	1981-12-03	-0.7
	1981-12-04	-0.9
	1981-12-05	-0.3
	1981-12-06	0.1
	1981-12-07	-0.8
	1981-12-08	-1
	1981-12-09	-1.1
	1981-12-10	-0.9
	1981-12-11	-0.5
	1981-12-12	-1.1
	1981-12-13	-1
	1981-12-14	-1.1
	1981-12-15	-0.4
	1981-12-16	-0.5
	1981-12-17	-0.8
	1981-12-18	-1
	1981-12-19	-0.9
	1981-12-20	-0.9
	1981-12-21	-0.9
	1981-12-22	-0.3
	1981-12-23	-0.7
	1981-12-24	-0.5
	1981-12-25	-0.4
	1981-12-26	-0.6
	1981-12-27	0
	1981-12-28	0
	1981-12-29	-0.9
	1981-12-30	-1
	1981-12-31	-0.8
	1982-01-01	-0.2
	1982-01-02	0
	1982-01-03	-0.4
	1982-01-04	-0.4
	1982-01-05	-0.4
	1982-01-06	-0.8
	1982-01-07	-0.2
	1982-01-08	-0.5
	1982-01-09	-0.8
	1982-01-10	-0.8
	1982-01-11	-0.8
	1982-01-12	-0.3
	1982-01-13	-0.8
	1982-01-14	-0.7
	1982-01-15	-1.1
	1982-01-16	-0.9
	1982-01-17	-0.2
	1982-01-18	-0.7
	1982-01-19	-0.2
	1982-01-20	-0.8
	1982-01-21	-1.2
	1982-01-22	-0.9
	1982-01-23	-0.7
	1982-01-24	-0.4
	1982-01-25	-0.1
	1982-01-26	-0.6
	1982-01-27	-0.4
	1982-01-28	-0.5
	1982-01-29	-0.6
	1982-01-30	-0.5
	1982-01-31	-0.4
	1982-02-01	-0.3
	1982-02-02	-0.6
	1982-02-03	-0.7
	1982-02-04	-0.6
	1982-02-05	-0.5
	1982-02-06	-0.6
	1982-02-07	-0.6
	1982-02-08	-0.2
	1982-02-09	-0.6
	1982-02-10	-0.2
	1982-02-11	-0.1
	1982-02-12	-0.5
	1982-02-13	-0.6
	1982-02-14	-0.4
	1982-02-15	-0.1
	1982-02-16	-0.2
	1982-02-17	-0.6
	1982-02-18	-0.3
	1982-02-19	-0.3
	1982-02-20	-0.6
	1982-02-21	-0.3
	1982-02-22	-0.6
	1982-02-23	-0.3
	1982-02-24	-0.8
	1982-02-25	-0.2
	1982-02-26	-0.2
	1982-02-27	-0.2
	1982-02-28	-0.1
	1982-03-01	-0.3
	1982-03-02	-0.2
	1982-03-03	-0.1
	1982-03-04	-0.1
	1982-03-05	-0.2
	1982-03-06	-0.4
	1982-03-07	-0.4
	1982-03-08	0.4
	1982-03-09	-0.3
	1982-03-10	-0.1
	1982-03-11	0
	1982-03-12	0
	1982-03-13	0
	1982-03-14	-0.4
	1982-03-15	-0.2
	1982-03-16	-0.2
	1982-03-17	-0.3
	1982-03-18	-0.2
	1982-03-19	-0.2
	1982-03-20	-0.2
	1982-03-21	-0.2
	1982-03-22	-0.1
	1982-03-23	0
	1982-03-24	0
	1982-03-25	0.1
	1982-03-26	0
	1982-03-27	0
	1982-03-28	0
	1982-03-29	-0.2
	1982-03-30	0.1
	1982-03-31	-0.2
	1982-04-01	0
	1982-04-02	-0.2
	1982-04-03	-0.1
	1982-04-04	0
	1982-04-05	0.1
	1982-04-06	0
	1982-04-07	0
	1982-04-08	0.2
	1982-04-09	0.3
	1982-04-10	0.9
	1982-04-11	0
	1982-04-12	0
	1982-04-13	0.2
	1982-04-14	0.1
	1982-04-15	0.2
	1982-04-16	1
	1982-04-17	0.7
	1982-04-18	0
	1982-04-19	0
	1982-04-20	0.7
	1982-04-21	1.2
	1982-04-22	0.8
	1982-04-23	0.8
	1982-04-24	0.2
	1982-04-25	0.5
	1982-04-26	1
	1982-04-27	1
	1982-04-28	0
	1982-04-29	0.1
	1982-04-30	0.3
	1982-05-01	0.6
	1982-05-02	0.9
	1982-05-03	0.5
	1982-05-04	0.1
	1982-05-05	0.4
	1982-05-06	0.5
	1982-05-07	0.3
	1982-05-08	0
	1982-05-09	0
	1982-05-10	0
	1982-05-11	0.3
	1982-05-12	0.7
	1982-05-13	0.5
	1982-05-14	0.9
	1982-05-15	0.6
	1982-05-16	0.2
	1982-05-17	0.5
	1982-05-18	0.2
	1982-05-19	0.2
	1982-05-20	0.4
	1982-05-21	0.3
	1982-05-22	-0.1
	1982-05-23	0.1
	1982-05-24	0.4
	1982-05-25	0.5
	1982-05-26	0.1
	1982-05-27	-0.2
	1982-05-28	-0.2
	1982-05-29	-0.1
	1982-05-30	0.8
	1982-05-31	0.9
	1982-06-01	0.4
	1982-06-02	0
	1982-06-03	0.3
	1982-06-04	0.1
	1982-06-05	0.4
	1982-06-06	0.3
	1982-06-07	0
	1982-06-08	-0.3
	1982-06-09	0.3
	1982-06-10	0.5
	1982-06-11	0.3
	1982-06-12	0.2
	1982-06-13	0
	1982-06-14	0.3
	1982-06-15	-0.1
	1982-06-16	0
	1982-06-17	0.1
	1982-06-18	-0.4
	1982-06-19	-0.5
	1982-06-20	-0.4
	1982-06-21	-0.1
	1982-06-22	0.1
	1982-06-23	0
	1982-06-24	0
	1982-06-25	-0.1
	1982-06-26	-0.2
	1982-06-27	0
	1982-06-28	0
	1982-06-29	0.2
	1982-06-30	-0.1
	1982-07-01	0
	1982-07-02	0
	1982-07-03	0
	1982-07-04	0.2
	1982-07-05	0
	1982-07-06	-0.1
	1982-07-07	0.3
	1982-07-08	-0.2
	1982-07-09	0
	1982-07-10	-0.6
	1982-07-11	-0.3
	1982-07-12	0
	1982-07-13	-0.4
	1982-07-14	0.4
	1982-07-15	0
	1982-07-16	0.3
	1982-07-17	-0.5
	1982-07-18	0.2
	1982-07-19	-0.1
	1982-07-20	999.9
	1982-07-21	-0.4
	1982-07-22	0
	1982-07-23	0
	1982-07-24	-0.6
	1982-07-25	-0.4
	1982-07-26	-0.6
	1982-07-27	-0.5
	1982-07-28	-1
	1982-07-29	-0.3
	1982-07-30	-0.3
	1982-07-31	-0.6
	1982-08-01	-0.5
	1982-08-02	-0.2
	1982-08-03	0.1
	1982-08-04	-0.2
	1982-08-05	-0.5
	1982-08-06	-0.4
	1982-08-07	-0.3
	1982-08-08	0
	1982-08-09	0
	1982-08-10	-0.2
	1982-08-11	0
	1982-08-12	0.2
	1982-08-13	-0.3
	1982-08-14	0
	1982-08-15	-0.4
	1982-08-16	0
	1982-08-17	-0.4
	1982-08-18	-0.4
	1982-08-19	-0.5
	1982-08-20	0
	1982-08-21	-0.3
	1982-08-22	-0.4
	1982-08-23	-0.3
	1982-08-24	-0.4
	1982-08-25	-0.1
	1982-08-26	-0.7
	1982-08-27	-0.3
	1982-08-28	-0.5
	1982-08-29	0.3
	1982-08-30	0
	1982-08-31	0
	1982-09-01	-0.1
	1982-09-02	-0.1
	1982-09-03	-0.5
	1982-09-04	0
	1982-09-05	-0.4
	1982-09-06	-0.4
	1982-09-07	-0.3
	1982-09-08	-0.5
	1982-09-09	-0.2
	1982-09-10	-0.2
	1982-09-11	-0.1
	1982-09-12	0
	1982-09-13	-0.3
	1982-09-14	-0.1
	1982-09-15	-0.1
	1982-09-16	0
	1982-09-17	-0.2
	1982-09-18	-0.8
	1982-09-19	-0.5
	1982-09-20	-0.6
	1982-09-21	-0.1
	1982-09-22	-0.4
	1982-09-23	-0.3
	1982-09-24	-0.5
	1982-09-25	-0.6
	1982-09-26	-0.2
	1982-09-27	-0.2
	1982-09-28	-0.2
	1982-09-29	0
	1982-09-30	-0.1
	1982-10-01	-0.3
	1982-10-02	-0.2
	1982-10-03	0
	1982-10-04	-0.1
	1982-10-05	-0.2
	1982-10-06	-0.1
	1982-10-07	-0.1
	1982-10-08	-0.1
	1982-10-09	-0.8
	1982-10-10	-0.2
	1982-10-11	-0.6
	1982-10-12	-0.8
	1982-10-13	-0.9
	1982-10-14	-0.5
	1982-10-15	-0.4
	1982-10-16	-0.2
	1982-10-17	0
	1982-10-18	-0.1
	1982-10-19	-0.7
	1982-10-20	-0.8
	1982-10-21	-0.3
	1982-10-22	-0.1
	1982-10-23	0
	1982-10-24	-0.6
	1982-10-25	-0.3
	1982-10-26	-0.1
	1982-10-27	0
	1982-10-28	0.2
	1982-10-29	-0.1
	1982-10-30	-0.5
	1982-10-31	-0.5
	1982-11-01	-0.1
	1982-11-02	0
	1982-11-03	-0.3
	1982-11-04	-0.3
	1982-11-05	-0.1
	1982-11-06	0
	1982-11-07	-0.7
	1982-11-08	0.2
	1982-11-09	-0.4
	1982-11-10	-0.5
	1982-11-11	-0.4
	1982-11-12	-0.1
	1982-11-13	-0.2
	1982-11-14	-0.2
	1982-11-15	-0.5
	1982-11-16	-0.5
	1982-11-17	-0.4
	1982-11-18	-0.3
	1982-11-19	0
	1982-11-20	-0.3
	1982-11-21	-0.5
	1982-11-22	-0.6
	1982-11-23	-0.7
	1982-11-24	-0.5
	1982-11-25	-0.7
	1982-11-26	-0.9
	1982-11-27	-0.8
	1982-11-28	-0.7
	1982-11-29	-0.6
	1982-11-30	-0.2
	1982-12-01	-0.3
	1982-12-02	-0.9
	1982-12-03	-0.8
	1982-12-04	-0.7
	1982-12-05	-0.2
	1982-12-06	0
	1982-12-07	-0.8
	1982-12-08	-0.5
	1982-12-09	-0.6
	1982-12-10	-0.9
	1982-12-11	-0.4
	1982-12-12	-0.3
	1982-12-13	-0.4
	1982-12-14	-1.1
	1982-12-15	-0.8
	1982-12-16	-0.4
	1982-12-17	-0.1
	1982-12-18	-0.5
	1982-12-19	-0.8
	1982-12-20	-0.4
	1982-12-21	-0.4
	1982-12-22	-0.5
	1982-12-23	-0.2
	1982-12-24	-0.8
	1982-12-25	-1
	1982-12-26	-1
	1982-12-27	-0.8
	1982-12-28	-0.2
	1982-12-29	-0.6
	1982-12-30	-1.2
	1982-12-31	-0.6
	1983-01-01	-0.7
	1983-01-02	-0.4
	1983-01-03	-0.2
	1983-01-04	-0.6
	1983-01-05	-0.9
	1983-01-06	-1
	1983-01-07	-0.3
	1983-01-08	-0.4
	1983-01-09	-0.4
	1983-01-10	-0.2
	1983-01-11	-0.8
	1983-01-12	-0.8
	1983-01-13	-0.9
	1983-01-14	-0.7
	1983-01-15	-1
	1983-01-16	-0.7
	1983-01-17	-0.6
	1983-01-18	-0.9
	1983-01-19	-1
	1983-01-20	-0.3
	1983-01-21	-0.6
	1983-01-22	-0.8
	1983-01-23	-0.6
	1983-01-24	-0.4
	1983-01-25	-0.5
	1983-01-26	-0.2
	1983-01-27	-0.9
	1983-01-28	-0.9
	1983-01-29	-0.6
	1983-01-30	-0.6
	1983-01-31	-0.5
	1983-02-01	-0.5
	1983-02-02	-0.6
	1983-02-03	-0.6
	1983-02-04	-0.7
	1983-02-05	-0.9
	1983-02-06	-0.6
	1983-02-07	-0.5
	1983-02-08	999.9
	1983-02-09	-0.5
	1983-02-10	-0.9
	1983-02-11	-0.4
	1983-02-12	-0.3
	1983-02-13	-0.6
	1983-02-14	-0.7
	1983-02-15	-0.8
	1983-02-16	-0.4
	1983-02-17	-0.2
	1983-02-18	-0.3
	1983-02-19	-0.7
	1983-02-20	-0.4
	1983-02-21	-0.7
	1983-02-22	-0.4
	1983-02-23	-0.2
	1983-02-24	-0.6
	1983-02-25	-0.2
	1983-02-26	-0.3
	1983-02-27	-0.4
	1983-02-28	0
	1983-03-01	-0.1
	1983-03-02	-0.4
	1983-03-03	0
	1983-03-04	-0.4
	1983-03-05	-0.4
	1983-03-06	-0.1
	1983-03-07	-0.2
	1983-03-08	-0.2
	1983-03-09	-0.3
	1983-03-10	-0.3
	1983-03-11	-0.3
	1983-03-12	-0.2
	1983-03-13	-0.1
	1983-03-14	-0.2
	1983-03-15	0
	1983-03-16	-0.4
	1983-03-17	-0.1
	1983-03-18	-0.4
	1983-03-19	0
	1983-03-20	0.1
	1983-03-21	0
	1983-03-22	0
	1983-03-23	0.2
	1983-03-24	-0.1
	1983-03-25	-0.3
	1983-03-26	0
	1983-03-27	0
	1983-03-28	0
	1983-03-29	0.2
	1983-03-30	-0.1
	1983-03-31	-0.2
	1983-04-01	0.1
	1983-04-02	-0.1
	1983-04-03	0
	1983-04-04	0
	1983-04-05	0.3
	1983-04-06	0.6
	1983-04-07	0.3
	1983-04-08	0.2
	1983-04-09	0.3
	1983-04-10	0.5
	1983-04-11	0.7
	1983-04-12	0.5
	1983-04-13	0.2
	1983-04-14	0.3
	1983-04-15	0.6
	1983-04-16	0
	1983-04-17	1
	1983-04-18	0.1
	1983-04-19	0.1
	1983-04-20	0.3
	1983-04-21	0.2
	1983-04-22	0.4
	1983-04-23	0.4
	1983-04-24	0
	1983-04-25	-0.1
	1983-04-26	0.3
	1983-04-27	0.2
	1983-04-28	0.4
	1983-04-29	0.7
	1983-04-30	0.3
	1983-05-01	0
	1983-05-02	0.4
	1983-05-03	0.5
	1983-05-04	0.8
	1983-05-05	0
	1983-05-06	0
	1983-05-07	0.2
	1983-05-08	0.6
	1983-05-09	0
	1983-05-10	0
	1983-05-11	0
	1983-05-12	0.1
	1983-05-13	0.5
	1983-05-14	0.3
	1983-05-15	0.2
	1983-05-16	0.5
	1983-05-17	0.4
	1983-05-18	-0.3
	1983-05-19	0.1
	1983-05-20	0.4
	1983-05-21	0.4
	1983-05-22	0.6
	1983-05-23	0
	1983-05-24	0
	1983-05-25	0.4
	1983-05-26	0.4
	1983-05-27	0.1
	1983-05-28	0.1
	1983-05-29	-0.1
	1983-05-30	0.5
	1983-05-31	0.4
	1983-06-01	0.2
	1983-06-02	0.3
	1983-06-03	0.2
	1983-06-04	0.2
	1983-06-05	0.5
	1983-06-06	0.1
	1983-06-07	0.3
	1983-06-08	0
	1983-06-09	0.1
	1983-06-10	0.5
	1983-06-11	0.1
	1983-06-12	0.1
	1983-06-13	0.1
	1983-06-14	-0.1
	1983-06-15	0
	1983-06-16	0.6
	1983-06-17	0
	1983-06-18	0.2
	1983-06-19	0.1
	1983-06-20	0.3
	1983-06-21	0.1
	1983-06-22	0
	1983-06-23	0
	1983-06-24	0.1
	1983-06-25	0
	1983-06-26	0
	1983-06-27	0
	1983-06-28	0.1
	1983-06-29	0
	1983-06-30	0.3
	1983-07-01	0
	1983-07-02	0
	1983-07-03	0.4
	1983-07-04	0
	1983-07-05	-0.6
	1983-07-06	-0.2
	1983-07-07	-0.1
	1983-07-08	0.5
	1983-07-09	0.3
	1983-07-10	0
	1983-07-11	-0.5
	1983-07-12	-0.2
	1983-07-13	0
	1983-07-14	0
	1983-07-15	0.4
	1983-07-16	0.2
	1983-07-17	0
	1983-07-18	0
	1983-07-19	0
	1983-07-20	0.1
	1983-07-21	0
	1983-07-22	999.9
	1983-07-23	0.2
	1983-07-24	-0.1
	1983-07-25	-0.2
	1983-07-26	0
	1983-07-27	-0.6
	1983-07-28	-0.3
	1983-07-29	0
	1983-07-30	0
	1983-07-31	-0.1
	1983-08-01	-0.2
	1983-08-02	0.1
	1983-08-03	-0.3
	1983-08-04	-0.1
	1983-08-05	0
	1983-08-06	-0.2
	1983-08-07	-0.2
	1983-08-08	0
	1983-08-09	0.2
	1983-08-10	-0.6
	1983-08-11	0
	1983-08-12	0.2
	1983-08-13	-0.1
	1983-08-14	0
	1983-08-15	-0.4
	1983-08-16	-0.2
	1983-08-17	0
	1983-08-18	-0.1
	1983-08-19	-0.6
	1983-08-20	0
	1983-08-21	-0.2
	1983-08-22	0
	1983-08-23	0.1
	1983-08-24	0
	1983-08-25	-0.2
	1983-08-26	-0.6
	1983-08-27	-0.5
	1983-08-28	0
	1983-08-29	0
	1983-08-30	-0.2
	1983-08-31	-0.5
	1983-09-01	-0.5
	1983-09-02	0.3
	1983-09-03	-0.1
	1983-09-04	0
	1983-09-05	-0.1
	1983-09-06	0
	1983-09-07	-0.1
	1983-09-08	-0.1
	1983-09-09	0
	1983-09-10	0
	1983-09-11	0
	1983-09-12	-0.4
	1983-09-13	-0.4
	1983-09-14	0
	1983-09-15	-0.4
	1983-09-16	-0.2
	1983-09-17	0.1
	1983-09-18	0
	1983-09-19	0
	1983-09-20	0
	1983-09-21	-0.5
	1983-09-22	-0.5
	1983-09-23	-0.4
	1983-09-24	-0.5
	1983-09-25	0
	1983-09-26	-0.3
	1983-09-27	0
	1983-09-28	-0.7
	1983-09-29	-0.3
	1983-09-30	-0.2
	1983-10-01	0.1
	1983-10-02	0.2
	1983-10-03	-0.2
	1983-10-04	-0.2
	1983-10-05	-0.6
	1983-10-06	-0.2
	1983-10-07	-0.7
	1983-10-08	-0.7
	1983-10-09	-0.2
	1983-10-10	-0.1
	1983-10-11	-0.9
	1983-10-12	-0.2
	1983-10-13	0
	1983-10-14	-0.3
	1983-10-15	-0.1
	1983-10-16	-0.9
	1983-10-17	0
	1983-10-18	0
	1983-10-19	-0.4
	1983-10-20	-0.3
	1983-10-21	-0.9
	1983-10-22	-0.2
	1983-10-23	-0.5
	1983-10-24	-0.7
	1983-10-25	-0.7
	1983-10-26	-0.6
	1983-10-27	-1
	1983-10-28	-0.7
	1983-10-29	-0.5
	1983-10-30	-0.1
	1983-10-31	-0.6
	1983-11-01	-0.7
	1983-11-02	-0.3
	1983-11-03	-0.3
	1983-11-04	0
	1983-11-05	-0.7
	1983-11-06	-0.3
	1983-11-07	-0.6
	1983-11-08	-0.6
	1983-11-09	-0.2
	1983-11-10	0.2
	1983-11-11	-0.3
	1983-11-12	-0.8
	1983-11-13	-0.6
	1983-11-14	-0.4
	1983-11-15	-0.1
	1983-11-16	-0.2
	1983-11-17	-0.3
	1983-11-18	-0.2
	1983-11-19	-0.5
	1983-11-20	-0.6
	1983-11-21	-0.4
	1983-11-22	-0.8
	1983-11-23	-0.7
	1983-11-24	-0.9
	1983-11-25	-0.6
	1983-11-26	-0.8
	1983-11-27	-0.9
	1983-11-28	-0.7
	1983-11-29	-1
	1983-11-30	-0.8
	1983-12-01	-1
	1983-12-02	-0.7
	1983-12-03	-0.8
	1983-12-04	-1
	1983-12-05	-0.9
	1983-12-06	-0.7
	1983-12-07	-1.1
	1983-12-08	-0.2
	1983-12-09	-0.3
	1983-12-10	-0.5
	1983-12-11	-0.8
	1983-12-12	-0.8
	1983-12-13	-0.5
	1983-12-14	-0.2
	1983-12-15	-0.9
	1983-12-16	-1
	1983-12-17	-0.9
	1983-12-18	-0.9
	1983-12-19	-0.2
	1983-12-20	-0.5
	1983-12-21	-1.1
	1983-12-22	-0.8
	1983-12-23	-0.8
	1983-12-24	-1
	1983-12-25	-0.6
	1983-12-26	-1
	1983-12-27	-0.8
	1983-12-28	-0.9
	1983-12-29	-0.9
	1983-12-30	-0.7
	1983-12-31	-0.5
	1984-01-01	-0.9
	1984-01-02	-0.8
	1984-01-03	999.9
	1984-01-04	-0.6
	1984-01-05	-0.9
	1984-01-06	-0.5
	1984-01-07	-0.9
	1984-01-08	-0.8
	1984-01-09	-1.2
	1984-01-10	-0.3
	1984-01-11	-0.6
	1984-01-12	-0.3
	1984-01-13	-1
	1984-01-14	-0.8
	1984-01-15	-0.8
	1984-01-16	-0.5
	1984-01-17	-1.1
	1984-01-18	-1
	1984-01-19	-1
	1984-01-20	-0.8
	1984-01-21	-0.8
	1984-01-22	-0.3
	1984-01-23	-0.4
	1984-01-24	-0.9
	1984-01-25	-0.5
	1984-01-26	-0.6
	1984-01-27	-0.7
	1984-01-28	-0.9
	1984-01-29	-0.5
	1984-01-30	-0.6
	1984-01-31	-0.7
	1984-02-01	-0.6
	1984-02-02	-0.7
	1984-02-03	-1.1
	1984-02-04	-1
	1984-02-05	-0.8
	1984-02-06	-0.7
	1984-02-07	-1.1
	1984-02-08	-0.9
	1984-02-09	-0.3
	1984-02-10	-0.7
	1984-02-11	-0.8
	1984-02-12	-0.8
	1984-02-13	-0.3
	1984-02-14	-0.8
	1984-02-15	-0.6
	1984-02-16	-0.7
	1984-02-17	-0.7
	1984-02-18	-0.6
	1984-02-19	-1
	1984-02-20	-0.6
	1984-02-21	-0.4
	1984-02-22	-0.7
	1984-02-23	-0.6
	1984-02-24	-0.6
	1984-02-25	-0.2
	1984-02-26	-0.2
	1984-02-27	0.1
	1984-02-28	0
	1984-02-29	0.4
	1984-03-01	0.1
	1984-03-02	0
	1984-03-03	-0.3
	1984-03-04	-0.2
	1984-03-05	-0.2
	1984-03-06	-0.4
	1984-03-07	-0.4
	1984-03-08	-0.2
	1984-03-09	-0.3
	1984-03-10	-0.2
	1984-03-11	-0.2
	1984-03-12	-0.1
	1984-03-13	0
	1984-03-14	0
	1984-03-15	0
	1984-03-16	-0.1
	1984-03-17	-0.2
	1984-03-18	-0.2
	1984-03-19	0.2
	1984-03-20	-0.1
	1984-03-21	-0.3
	1984-03-22	-0.3
	1984-03-23	-0.3
	1984-03-24	0
	1984-03-25	0.2
	1984-03-26	0
	1984-03-27	0
	1984-03-28	-0.3
	1984-03-29	-0.3
	1984-03-30	0
	1984-03-31	0
	1984-04-01	0
	1984-04-02	0
	1984-04-03	0.3
	1984-04-04	0.1
	1984-04-05	0.2
	1984-04-06	0
	1984-04-07	0.4
	1984-04-08	0.1
	1984-04-09	0.1
	1984-04-10	-0.3
	1984-04-11	0
	1984-04-12	0.1
	1984-04-13	0.3
	1984-04-14	0.5
	1984-04-15	0
	1984-04-16	-0.1
	1984-04-17	0.1
	1984-04-18	-0.2
	1984-04-19	0
	1984-04-20	0
	1984-04-21	0.1
	1984-04-22	0
	1984-04-23	0.1
	1984-04-24	0.3
	1984-04-25	0.3
	1984-04-26	0
	1984-04-27	0.1
	1984-04-28	0.3
	1984-04-29	0.5
	1984-04-30	0.6
	1984-05-01	0.5
	1984-05-02	0.2
	1984-05-03	0
	1984-05-04	0.3
	1984-05-05	0.2
	1984-05-06	0
	1984-05-07	0.4
	1984-05-08	0.1
	1984-05-09	0.2
	1984-05-10	0.8
	1984-05-11	0.3
	1984-05-12	0.3
	1984-05-13	0
	1984-05-14	-0.2
	1984-05-15	0.1
	1984-05-16	0.3
	1984-05-17	0.3
	1984-05-18	0
	1984-05-19	0.1
	1984-05-20	0
	1984-05-21	0.3
	1984-05-22	0.1
	1984-05-23	0
	1984-05-24	0.3
	1984-05-25	0.3
	1984-05-26	0.2
	1984-05-27	0.9
	1984-05-28	0
	1984-05-29	0.3
	1984-05-30	999.9
	1984-05-31	0
	1984-06-01	-0.1
	1984-06-02	-0.1
	1984-06-03	0.2
	1984-06-04	0
	1984-06-05	0.4
	1984-06-06	0.1
	1984-06-07	0.4
	1984-06-08	0.3
	1984-06-09	0.1
	1984-06-10	0.1
	1984-06-11	-0.2
	1984-06-12	0.1
	1984-06-13	0.3
	1984-06-14	0
	1984-06-15	-0.1
	1984-06-16	0.2
	1984-06-17	-0.2
	1984-06-18	-0.1
	1984-06-19	0
	1984-06-20	0
	1984-06-21	0
	1984-06-22	0.1
	1984-06-23	-0.1
	1984-06-24	-0.1
	1984-06-25	-0.2
	1984-06-26	-0.4
	1984-06-27	-0.1
	1984-06-28	0.1
	1984-06-29	0.4
	1984-06-30	-0.1
	1984-07-01	-0.5
	1984-07-02	-0.5
	1984-07-03	-0.4
	1984-07-04	0.1
	1984-07-05	-0.1
	1984-07-06	0.1
[truncated: 5,058 more rows]
[truncated: 1 more columns]

## Sheet: Inversion calc
						Inversion	Inversion
	FLBS	FLBS		Tmin(dC)	Tmx(dC)	Night inversion	Day inversion
Date	Tmx(dC)	Tmn(dC)		flbs-snotel	flbs-snotel
1994-02-01	0	-6.66667		5.33333	7	0	0
1994-02-02	1.11111	-5		6	7.11111	0	0
1994-02-03	-0.555556	-8.33333		3.66667	7.44444	0	0
1994-02-04	0.555556	-5		7	4.55556	0	0			Noisy Basin = USDA Natural Resources and Conservation Service Montana SNOTEL Site: Station# MT13A25S, NOISY BASIN; elevation = 1841 m
1994-02-05	4.44444	-7.22222		4.77778	10.4444	0	0			FLBS = NOAA weather station at the Flathead Lake Biological Station; elevation = 882 m
1994-02-06	3.88889	-12.2222		0.777778	10.8889	0	0			Tmin(dC) = minimum daily air temperature in degC
1994-02-07	-12.2222	-16.6667		9.33333	-4.22222	0	1			Tmx(dC) = maximum daily air temperature in degC
1994-02-08	-14.4444	-22.2222		4.77778	9.55556	0	0
1994-02-09	-2.77778	-15		13	13.2222	0	0
1994-02-10	-1.66667	-6.11111		9.88889	8.33333	0	0
1994-02-11	-0.555556	-8.88889		3.11111	4.44444	0	0
1994-02-12	2.22222	-1.11111		10.8889	11.2222	0	0
1994-02-13	4.44444	-1.11111		7.88889	11.4444	0	0
1994-02-14	3.33333	0		7	8.33333	0	0
1994-02-15	5.55556	-2.77778		6.22222	9.55556	0	0
1994-02-16	6.66667	-2.22222		3.77778	9.66667	0	0
1994-02-17	3.88889	-1.66667		4.33333	1.88889	0	0
1994-02-18	3.88889	1.11111		3.11111	-0.111111	0	1
1994-02-19	2.77778	-0.555556		7.44444	3.77778	0	0
1994-02-20	3.33333	-1.66667		6.33333	8.33333	0	0
1994-02-21	1.11111	-5		2	2.11111	0	0
1994-02-22	1.66667	-3.88889		5.11111	2.66667	0	0
1994-02-23	2.77778	-1.11111		7.88889	6.77778	0	0
1994-02-24	0.555556	-15.5556		-0.555556	4.55556	1	0
1994-02-25	-8.88889	-13.3333		7.66667	7.11111	0	0
1994-02-26	-2.77778	-8.88889		10.1111	3.22222	0	0
1994-02-27	1.11111	-3.88889		2.11111	1.11111	0	0
1994-02-28	7.77778	0		4	7.77778	0	0
1994-03-01	11.6667	3.33333		7.33333	11.6667	0	0
1994-03-02	15.5556	3.33333		3.33333	12.5556	0	0
1994-03-03	12.2222	5		5	5.22222	0	0
1994-03-04	10	5		5	8	0	0
1994-03-05	5.55556	0		4	4.55556	0	0
1994-03-06	6.66667	-3.33333		4.66667	5.66667	0	0
1994-03-07	5.55556	-5		5	5.55556	0	0
1994-03-08	7.22222	-5.55556		6.44444	10.2222	0	0
1994-03-09	7.77778	-5		5	7.77778	0	0
1994-03-10	6.11111	-2.77778		5.22222	4.11111	0	0
1994-03-11	7.22222	-0.555556		2.44444	4.22222	0	0
1994-03-12	10	-2.22222		2.77778	8	0	0
1994-03-13	7.22222	0		6	3.22222	0	0
1994-03-14	13.3333	4.44444		5.44444	7.33333	0	0
1994-03-15	16.1111	-1.11111		-1.11111	7.11111	1	0
1994-03-16	11.6667	0		0	0.666667	0	0
1994-03-17	5	1.66667		6.66667	0	0	0
1994-03-18	8.88889	3.88889		9.88889	10.8889	0	0
1994-03-19	5	-0.555556		6.44444	5	0	0
1994-03-20	5	0		9	8	0	0
1994-03-21	5.55556	1.66667		10.6667	7.55556	0	0
1994-03-22	3.33333	-3.33333		4.66667	2.33333	0	0
1994-03-23	2.22222	-0.555556		9.44444	3.22222	0	0
1994-03-24	5.55556	-3.88889		7.11111	6.55556	0	0
1994-03-25	8.33333	-5		6	4.33333	0	0
1994-03-26	10	-3.33333		6.66667	8	0	0
1994-03-27	9.44444	-2.77778		3.22222	5.44444	0	0
1994-03-28	11.6667	0		7	7.66667	0	0
1994-03-29	12.2222	-3.33333		1.66667	7.22222	0	0
1994-03-30	10	-2.77778		3.22222	2	0	0
1994-03-31	12.2222	-2.77778		-1.77778	1.22222	1	0
1994-04-01	13.8889	0		-1	-0.111111	1	1
1994-04-02	15	3.33333		4.33333	6	0	0
1994-04-03	8.88889	3.33333		5.33333	-0.111111	0	1
1994-04-04	6.66667	1.11111		5.11111	3.66667	0	0
1994-04-05	6.66667	2.22222		7.22222	2.66667	0	0
1994-04-06	5	0		5	6	0	0
1994-04-07	6.66667	1.11111		6.11111	5.66667	0	0
1994-04-08	11.1111	0.555556		5.55556	8.11111	0	0
1994-04-09	11.6667	1.11111		5.11111	3.66667	0	0
1994-04-10	12.7778	2.22222		5.22222	1.77778	0	0
1994-04-11	13.8889	1.66667		3.66667	6.88889	0	0
1994-04-12	13.8889	3.88889		4.88889	5.88889	0	0
1994-04-13	9.44444	4.44444		6.44444	3.44444	0	0
1994-04-14	7.77778	1.11111		5.11111	9.77778	0	0
1994-04-15	15.5556	5		10	13.5556	0	0
1994-04-16	20.5556	3.33333		7.33333	10.5556	0	0
1994-04-17	22.2222	8.33333		5.33333	6.22222	0	0
1994-04-18	22.2222	5.55556		-0.444444	6.22222	1	0
1994-04-19	21.1111	8.33333		3.33333	8.11111	0	0
1994-04-20	15.5556	5.55556		2.55556	3.55556	0	0
1994-04-21	15.5556	6.66667		3.66667	0.555556	0	0
1994-04-22	15.5556	7.77778		3.77778	-0.444444	0	1
1994-04-23	15.5556	2.77778		1.77778	9.55556	0	0
1994-04-24	15.5556	7.77778		7.77778	7.55556	0	0
1994-04-25	11.6667	6.11111		7.11111	7.66667	0	0
1994-04-26	8.33333	2.77778		7.77778	9.33333	0	0
1994-04-27	10.5556	2.22222		8.22222	9.55556	0	0
1994-04-28	10.5556	1.66667		8.66667	9.55556	0	0
1994-04-29	13.3333	-1.66667		5.33333	9.33333	0	0
1994-04-30	15.5556	1.66667		6.66667	6.55556	0	0
1994-05-01	15.5556	2.77778		2.77778	5.55556	0	0
1994-05-02	12.7778	3.33333		5.33333	5.77778	0	0
1994-05-03	16.1111	5		6	11.1111	0	0
1994-05-04	16.1111	4.44444		5.44444	6.11111	0	0
1994-05-05	17.7778	6.11111		4.11111	9.77778	0	0
1994-05-06	17.7778	3.33333		2.33333	6.77778	0	0
1994-05-07	22.2222	5.55556		2.55556	8.22222	0	0
1994-05-08	23.3333	10.5556		4.55556	5.33333	0	0
1994-05-09	25	7.77778		2.77778	8	0	0
1994-05-10	25	15.5556		8.55556	7	0	0
1994-05-11	23.8889	8.88889		2.88889	7.88889	0	0
1994-05-12	23.8889	11.1111		5.11111	5.88889	0	0
1994-05-13	17.7778	8.33333		5.33333	5.77778	0	0
1994-05-14	17.7778	5.55556		5.55556	7.77778	0	0
1994-05-15	17.2222	10		11	5.22222	0	0
1994-05-16	17.2222	5.55556		5.55556	5.22222	0	0
1994-05-17	15	7.22222		7.22222	4	0	0
1994-05-18	16.6667	6.66667		5.66667	12.6667	0	0
1994-05-19	16.6667	6.11111		6.11111	7.66667	0	0
1994-05-20	11.1111	7.22222		7.22222	6.11111	0	0
1994-05-21	12.7778	7.77778		7.77778	6.77778	0	0
1994-05-22	15.5556	4.44444		4.44444	9.55556	0	0
1994-05-23	20	6.11111		6.11111	7	0	0
1994-05-24	21.6667	7.22222		4.22222	5.66667	0	0
1994-05-25	25.5556	7.77778		2.77778	7.55556	0	0
1994-05-26	25	10		3	5	0	0
1994-05-27	22.2222	11.6667		5.66667	1.22222	0	0
1994-05-28	16.6667	6.11111		6.11111	5.66667	0	0
1994-05-29	15.5556	9.44444		11.4444	4.55556	0	0
1994-05-30	16.1111	5		5	14.1111	0	0
1994-05-31	16.6667	4.44444		4.44444	5.66667	0	0
1994-06-01	15	10.5556		8.55556	1	0	0
1994-06-02	20.5556	6.11111		4.11111	14.5556	0	0
1994-06-03	21.6667	6.66667		6.66667	7.66667	0	0
1994-06-04	20.5556	11.6667		5.66667	2.55556	0	0
1994-06-05	21.6667	7.22222		4.22222	12.6667	0	0
1994-06-06	21.1111	10		8	5.11111	0	0
1994-06-07	13.8889	6.11111		5.11111	-0.111111	0	1
1994-06-08	13.8889	6.66667		6.66667	7.88889	0	0
1994-06-09	17.7778	6.11111		6.11111	12.7778	0	0
1994-06-10	20.5556	7.22222		6.22222	10.5556	0	0
1994-06-11	23.3333	7.77778		5.77778	7.33333	0	0
1994-06-12	21.1111	10.5556		4.55556	3.11111	0	0
1994-06-13	20	11.6667		5.66667	8	0	0
1994-06-14	13.8889	7.77778		6.77778	7.88889	0	0
1994-06-15	14.4444	8.88889		9.88889	10.4444	0	0
1994-06-16	13.8889	6.66667		6.66667	7.88889	0	0
1994-06-17	20	5.55556		5.55556	13	0	0
1994-06-18	21.6667	6.11111		4.11111	8.66667	0	0
1994-06-19	25.5556	6.66667		3.66667	5.55556	0	0
1994-06-20	22.7778	7.77778		6.77778	5.77778	0	0
1994-06-21	26.1111	10		2	2.11111	0	0
1994-06-22	28.8889	12.2222		0.222222	3.88889	0	0
1994-06-23	31.1111	13.3333		2.33333	6.11111	0	0
1994-06-24	28.3333	13.8889		2.88889	3.33333	0	0
1994-06-25	24.4444	8.33333		2.33333	5.44444	0	0
1994-06-26	22.2222	4.44444		-0.555556	0.222222	1	0
1994-06-27	23.3333	6.38889		3.38889	12.3333	0	0
1994-06-28
1994-06-29	28.0556	11.6667		5.66667	6.05556	0	0
1994-06-30	28.3333	11.6667		3.66667	4.33333	0	0
1994-07-01	27.7778	11.6667		4.66667	4.77778	0	0
1994-07-02	23.8889	11.1111		3.11111	0.888889	0	0
1994-07-03	17.7778	7.77778		5.77778	8.77778	0	0
1994-07-04	22.2222	11.1111		11.1111	14.2222	0	0
1994-07-05	22.7778	10.5556		7.55556	5.77778	0	0
1994-07-06	24.4444	12.2222		6.22222	11.4444	0	0
1994-07-07	25.5556	11.6667		6.66667	7.55556	0	0
1994-07-08	29.4444	12.2222		6.22222	9.44444	0	0
1994-07-09	28.8889	15.5556		5.55556	4.88889	0	0
1994-07-10	28.8889	14.4444		3.44444	3.88889	0	0
1994-07-11	26.6667	12.2222		3.22222	4.66667	0	0
1994-07-12	25.5556	12.7778		5.77778	2.55556	0	0
1994-07-13	26.6667	12.7778		4.77778	7.66667	0	0
1994-07-14	26.6667	12.2222		4.22222	5.66667	0	0
1994-07-15	25	11.6667		3.66667	5	0	0
1994-07-16	24.4444	11.1111		3.11111	5.44444	0	0
1994-07-17	28.8889	12.7778		4.77778	7.88889	0	0
1994-07-18	24.4444	20.5556		9.55556	-1.55556	0	1
1994-07-19	26.6667	13.3333		4.33333	8.66667	0	0
1994-07-20	30	12.2222		5.22222	9	0	0
1994-07-21	33.3333	12.7778		2.77778	9.33333	0	0
1994-07-22	33.3333	17.7778		5.77778	5.33333	0	0
1994-07-23	32.7778	17.2222		4.22222	7.77778	0	0
1994-07-24	33.3333	15.5556		-0.444444	5.33333	1	0
1994-07-25	31.1111	17.2222		2.22222	4.11111	0	0
1994-07-26	35	15.5556		1.55556	11	0	0
1994-07-27	32.2222	14.4444		0.444444	4.22222	0	0
1994-07-28	32.2222	14.4444		2.44444	6.22222	0	0
1994-07-29	32.7778	15		1	6.77778	0	0
1994-07-30	27.2222	17.2222		2.22222	1.22222	0	0
1994-07-31	32.2222	15.5556		2.55556	10.2222	0	0
1994-08-01	32.7778	18.3333		7.33333	7.77778	0	0
1994-08-02	30.5556	15		2	10.5556	0	0
1994-08-03	33.3333	18.3333		6.33333	6.33333	0	0
1994-08-04	31.6667	16.1111		2.11111	6.66667	0	0
1994-08-05	33.3333	16.6667		6.66667	8.33333	0	0
1994-08-06	28.3333	14.4444		4.44444	2.33333	0	0
1994-08-07	31.1111	14.4444		7.44444	11.1111	0	0
1994-08-08	30	20		10	6	0	0
1994-08-09	28.3333	14.4444		4.44444	5.33333	0	0
1994-08-10	29.4444	11.1111		2.11111	8.44444	0	0
1994-08-11	27.2222	15		6	3.22222	0	0
1994-08-12	29.4444	12.7778		0.777778	5.44444	0	0
1994-08-13	30	17.7778		6.77778	6	0	0
1994-08-14	32.2222	15		1	6.22222	0	0
1994-08-15	30.5556	17.7778		1.77778	1.55556	0	0
1994-08-16	28.3333	12.7778		2.77778	5.33333	0	0
1994-08-17	28.8889	13.8889		6.88889	7.88889	0	0
1994-08-18	27.2222	12.7778		5.77778	8.22222	0	0
1994-08-19	25.5556	12.7778		4.77778	5.55556	0	0
1994-08-20	30.5556	13.8889		3.88889	6.55556	0	0
1994-08-21	31.1111	15		2	8.11111	0	0
1994-08-22	30.5556	12.2222		3.22222	8.55556	0	0
1994-08-23	23.3333	16.1111		8.11111	9.33333	0	0
1994-08-24	26.1111	11.6667		4.66667	12.1111	0	0
1994-08-25	24.4444	11.6667		4.66667	7.44444	0	0
1994-08-26	23.3333	11.1111		3.11111	5.33333	0	0
1994-08-27	24.4444	8.33333		3.33333	7.44444	0	0
1994-08-28	23.3333	8.88889		3.88889	7.33333	0	0
1994-08-29	25	14.4444		7.44444	5	0	0
1994-08-30	22.2222	11.6667		4.66667	4.22222	0	0
1994-08-31	22.7778	13.3333		8.33333	11.7778	0	0
1994-09-01	23.3333	12.2222		7.22222	11.3333	0	0
1994-09-02	23.3333	12.7778		7.77778	7.33333	0	0
1994-09-03	25	11.1111		3.11111	7	0	0
1994-09-04	20.5556	10		6	11.5556	0	0
1994-09-05	21.6667	7.77778		4.77778	14.6667	0	0
1994-09-06	25	6.66667		4.66667	13	0	0
1994-09-07	25	10		4	8	0	0
1994-09-08	25	10.5556		1.55556	5	0	0
1994-09-09	23.3333	11.1111		1.11111	2.33333	0	0
1994-09-10	17.7778	7.22222		6.22222	2.77778	0	0
1994-09-11	18.3333	7.77778		4.77778	8.33333	0	0
1994-09-12	20	6.11111		4.11111	10	0	0
1994-09-13	21.1111	5.55556		3.55556	9.11111	0	0
1994-09-14	21.1111	8.88889		4.88889	6.11111	0	0
1994-09-15	22.2222	14.4444		11.4444	8.22222	0	0
1994-09-16	22.7778	8.88889		3.88889	8.77778	0	0
1994-09-17	25.5556	9.44444		4.44444	10.5556	0	0
1994-09-18	26.1111	10		0	7.11111	0	0
1994-09-19	24.4444	8.88889		-0.111111	5.44444	1	0
1994-09-20	26.6667	9.44444		0.444444	7.66667	0	0
1994-09-21	26.6667	10		8	8.66667	0	0
1994-09-22	21.6667	5		4	11.6667	0	0
1994-09-23	27.7778	6.11111		1.11111	12.7778	0	0
1994-09-24	22.7778	7.22222		-0.777778	3.77778	1	0
1994-09-25	27.2222	7.22222		-2.77778	5.22222	1	0
1994-09-26	26.6667	10.5556		0.555556	6.66667	0	0
1994-09-27	26.1111	10		2	8.11111	0	0
1994-09-28	25.5556	8.88889		0.888889	6.55556	0	0
1994-09-29	26.1111	11.1111		2.11111	7.11111	0	0
1994-09-30	22.7778	7.22222		1.22222	7.77778	0	0
1994-10-01	22.2222	8.88889		3.88889	8.22222	0	0
1994-10-02	11.6667	4.44444		3.44444	-3.33333	0	1
1994-10-03	12.2222	2.77778		6.77778	11.2222	0	0
1994-10-04	12.7778	3.33333		7.33333	11.7778	0	0
1994-10-05	15.5556	3.33333		6.33333	9.55556	0	0
1994-10-06	16.6667	7.22222		6.22222	7.66667	0	0
1994-10-07	17.7778	5.55556		4.55556	8.77778	0	0
1994-10-08	17.2222	3.33333		3.33333	9.22222	0	0
1994-10-09	18.8889	2.77778		2.77778	8.88889	0	0
1994-10-10	17.7778	7.77778		3.77778	4.77778	0	0
1994-10-11	17.2222	7.77778		3.77778	5.22222	0	0
1994-10-12	13.3333	4.44444		5.44444	9.33333	0	0
1994-10-13	12.7778	1.66667		4.66667	10.7778	0	0
1994-10-14	13.3333	5		8	9.33333	0	0
1994-10-15	7.77778	3.33333		5.33333	5.77778	0	0
1994-10-16	8.88889	2.77778		4.77778	8.88889	0	0
1994-10-17	11.1111	3.88889		6.88889	8.11111	0	0
1994-10-18	11.1111	7.22222		9.22222	9.11111	0	0
1994-10-19	15	2.77778		3.77778	13	0	0
1994-10-20	13.8889	7.77778		9.77778	9.88889	0	0
1994-10-21	12.2222	7.77778		8.77778	11.2222	0	0
1994-10-22	11.1111	2.77778		5.77778	10.1111	0	0
1994-10-23	9.44444	3.33333		7.33333	9.44444	0	0
1994-10-24	8.33333	0		4	8.33333	0	0
1994-10-25	6.66667	1.66667		4.66667	4.66667	0	0
1994-10-26	15	1.66667		2.66667	9	0	0
1994-10-27	14.4444	7.22222		6.22222	8.44444	0	0
1994-10-28	8.88889	5		6	6.88889	0	0
1994-10-29	7.77778	3.88889		7.88889	8.77778	0	0
1994-10-30	7.22222	-2.22222		5.77778	10.2222	0	0
1994-10-31	7.22222	0.555556		6.55556	11.2222	0	0
1994-11-01	7.22222	1.11111		6.11111	7.22222	0	0
1994-11-02	3.88889	-0.555556		5.44444	5.88889	0	0
1994-11-03	2.77778	-1.66667		7.33333	7.77778	0	0
1994-11-04	3.88889	-1.11111		7.88889	10.8889	0	0
1994-11-05	4.44444	-0.555556		8.44444	8.44444	0	0
1994-11-06	2.22222	-2.22222		6.77778	5.22222	0	0
1994-11-07	4.44444	0.555556		8.55556	5.44444	0	0
1994-11-08	6.11111	0		7	11.1111	0	0
1994-11-09	4.44444	-1.11111		6.88889	6.44444	0	0
1994-11-10	5.55556	0		7	7.55556	0	0
1994-11-11	7.77778	0		3	6.77778	0	0
1994-11-12	5	-0.555556		5.44444	5	0	0
1994-11-13	4.44444	0.555556		7.55556	6.44444	0	0
1994-11-14	4.44444	-1.11111		7.88889	9.44444	0	0
1994-11-15	4.44444	-2.77778		5.22222	8.44444	0	0
1994-11-16	5.55556	1.11111		9.11111	9.55556	0	0
1994-11-17	3.33333	-3.33333		3.66667	7.33333	0	0
1994-11-18	4.44444	-1.11111		14.8889	11.4444	0	0
1994-11-19
1994-11-20
1994-11-21
1994-11-22
1994-11-23
1994-11-24
1994-11-25
1994-11-26
1994-11-27	3.33333				7.33333		0
1994-11-28	2.22222	1.66667		11.6667	10.2222	0	0
1994-11-29	4.44444	-1.11111		8.88889	11.4444	0	0
1994-11-30	9.44444	4.44444		14.4444	11.4444	0	0
1994-12-01	8.88889	5		7	8.88889	0	0
1994-12-02	5.55556	0.555556		6.55556	6.55556	0	0
1994-12-03	1.66667	-3.33333		5.66667	5.66667	0	0
1994-12-04	-3.33333	-8.88889		6.11111	4.66667	0	0
1994-12-05	-7.22222	-10.5556		8.44444	2.77778	0	0
1994-12-06	-6.11111	-9.44444		11.5556	3.88889	0	0
1994-12-07	-1.66667	-6.11111		5.88889	4.33333	0	0
1994-12-08	0	-2.22222		9.77778	9	0	0
1994-12-09	0.555556	-2.22222		8.77778	9.55556	0	0
1994-12-10	0	-7.22222		4.77778	8	0	0
1994-12-11	-0.555556	-7.22222		4.77778	6.44444	0	0
1994-12-12	-1.11111	-3.88889		6.11111	3.88889	0	0
1994-12-13	-2.22222	-3.33333		6.66667	1.77778	0	0
1994-12-14	0	-2.77778		7.22222	6	0	0
1994-12-15	2.22222	-2.77778		6.22222	10.2222	0	0
1994-12-16	5	-1.66667		7.33333	12	0	0
1994-12-17	7.22222	0.555556		7.55556	10.2222	0	0
1994-12-18	0.555556	1.66667		5.66667	0.555556	0	0
1994-12-19	5.55556	1.11111		4.11111	5.55556	0	0
1994-12-20	11.6667	1.66667		6.66667	13.6667	0	0
1994-12-21	10	2.22222		5.22222	9	0	0
1994-12-22	6.66667	-2.22222		1.77778	6.66667	0	0
1994-12-23	-1.11111	-2.77778		1.22222	-1.11111	0	1
1994-12-24	-0.555556	-2.22222		0.777778	-1.55556	0	1
1994-12-25	2.77778	-1.66667		1.33333	0.777778	0	0
1994-12-26	6.11111	-2.22222		3.77778	8.11111	0	0
1994-12-27	4.44444	1.11111		7.11111	6.44444	0	0
1994-12-28	3.88889	2.22222		4.22222	3.88889	0	0
1994-12-29	2.77778	-0.555556		7.44444	2.77778	0	0
1994-12-30	0.555556	-4.44444		5.55556	7.55556	0	0
1994-12-31	-3.33333	-11.1111		4.88889	6.66667	0	0
1995-01-01	-5.55556	-8.33333		8.66667	5.44444	0	0
1995-01-02	-6.66667	-4.44444		11.5556	2.33333	0	0
1995-01-03	-7.77778	-10		6	1.22222	0	0
1995-01-04	-7.77778	-11.6667		4.33333	2.22222	0	0
1995-01-05	-10	-12.2222		0.777778	0	0	0
1995-01-06	-7.77778	-10.5556		2.44444	0.222222	0	0
1995-01-07	-4.44444	-7.77778		6.22222	4.55556	0	0
1995-01-08	-2.77778	-6.11111		2.88889	1.22222	0	0
1995-01-09	0.555556	-3.33333		2.66667	2.55556	0	0
1995-01-10	2.77778	0		2	1.77778	0	0
1995-01-11	3.33333	0		0	1.33333	0	0
1995-01-12	5.55556	-0.555556		2.44444	5.55556	0	0
1995-01-13	4.44444	0		3	5.44444	0	0
1995-01-14	5.55556	1.11111		4.11111	5.55556	0	0
1995-01-15	6.66667	-0.555556		1.44444	6.66667	0	0
1995-01-16	6.66667	-0.555556		6.44444	6.66667	0	0
1995-01-17	2.22222	-1.11111		6.88889	5.22222	0	0
1995-01-18	2.77778	-1.11111		6.88889	7.77778	0	0
1995-01-19	6.66667	0.555556		8.55556	9.66667	0	0
1995-01-20	2.77778	-5		3	3.77778	0	0
1995-01-21	-0.555556	-2.77778		7.22222	4.44444	0	0
1995-01-22	-2.77778	-4.44444		9.55556	4.22222	0	0
1995-01-23	-3.88889	-6.11111		8.88889	3.11111	0	0
1995-01-24	-2.77778	-7.77778		2.22222	3.22222	0	0
1995-01-25	-1.11111	-8.33333		-0.333333	0.888889	1	0
1995-01-26	0	-5		0	-2	0	1
1995-01-27	2.77778	-2.77778		1.22222	0.777778	0	0
1995-01-28	2.77778	-2.77778		3.22222	5.77778	0	0
1995-01-29	0.555556	-3.33333		5.66667	2.55556	0	0
1995-01-30	8.33333	0		8	10.3333	0	0
1995-01-31	10	3.33333		4.33333	9	0	0
1995-02-01	10.5556	5		5	8.55556	0	0
1995-02-02	9.44444	1.66667		4.66667	7.44444	0	0
1995-02-03	3.33333	-2.77778		3.22222	3.33333	0	0
1995-02-04	5	-1.66667		4.33333	5	0	0
1995-02-05	6.66667	-1.11111		0.888889	3.66667	0	0
1995-02-06	6.11111	-1.66667		-0.666667	5.11111	1	0
1995-02-07	8.88889	-1.11111		-0.111111	4.88889	1	0
1995-02-08	10	-3.33333		1.66667	8	0	0
1995-02-09	6.11111	-1.66667		4.33333	7.11111	0	0
1995-02-10	5	-5		3	5	0	0
1995-02-11	-3.33333	-8.33333		8.66667	4.66667	0	0
1995-02-12	-7.22222	-15.5556		7.44444	7.77778	0	0
1995-02-13	-10.5556	-15.5556		10.4444	11.4444	0	0
1995-02-14	-6.66667	-12.7778		12.2222	10.3333	0	0
1995-02-15	0.555556	-9.44444		12.5556	15.5556	0	0
1995-02-16	5	-1.66667		14.3333	13	0	0
1995-02-17	6.66667	1.11111		9.11111	11.6667	0	0
1995-02-18	7.22222	4.44444		9.44444	9.22222	0	0
1995-02-19	11.1111	6.11111		10.1111	11.1111	0	0
1995-02-20	16.6667	3.88889		3.88889	13.6667	0	0
1995-02-21	13.3333	6.66667		4.66667	7.33333	0	0
1995-02-22	11.6667	6.66667		7.66667	7.66667	0	0
1995-02-23	10.5556	-2.22222		0.777778	7.55556	0	0
1995-02-24	16.6667	-1.66667		2.33333	12.6667	0	0
1995-02-25	13.3333	5.55556		4.55556	5.33333	0	0
1995-02-26	9.44444	2.22222		4.22222	7.44444	0	0
1995-02-27	6.66667	-6.66667		8.33333	6.66667	0	0
1995-02-28	2.22222	-7.22222		8.77778	9.22222	0	0
1995-03-01	1.66667	-8.88889		9.11111	12.6667	0	0
1995-03-02	0.555556	-11.6667		6.33333	10.5556	0	0
1995-03-03	0	-10		5	6	0	0
1995-03-04	0	-7.22222		4.77778	4	0	0
1995-03-05	-1.66667	-10.5556		1.44444	5.33333	0	0
1995-03-06	0	-5.55556		6.44444	6	0	0
1995-03-07	1.66667	-7.22222		4.77778	7.66667	0	0
1995-03-08	0.555556	-6.11111		4.88889	2.55556	0	0
1995-03-09	3.33333	-0.555556		8.44444	4.33333	0	0
1995-03-10	12.7778	1.66667		2.66667	9.77778	0	0
1995-03-11	10.5556	2.22222		2.22222	4.55556	0	0
1995-03-12	10	0		1	5	0	0
1995-03-13	6.66667	-1.11111		1.88889	3.66667	0	0
1995-03-14	7.22222	0		6	8.22222	0	0
1995-03-15	6.66667	2.77778		4.77778	1.66667	0	0
1995-03-16	9.44444	2.22222		5.22222	5.44444	0	0
1995-03-17	8.88889	-3.33333		2.66667	5.88889	0	0
1995-03-18	6.66667	-1.66667		5.33333	1.66667	0	0
1995-03-19	6.66667	2.22222		5.22222	0.666667	0	0
1995-03-20	8.33333	-2.22222		4.77778	9.33333	0	0
1995-03-21	7.22222	0.555556		7.55556	4.22222	0	0
1995-03-22	8.88889	-2.22222		4.77778	7.88889	0	0
1995-03-23	10.5556	1.66667		10.6667	6.55556	0	0
1995-03-24	6.66667	0.555556		4.55556	-0.333333	0	1
1995-03-25	4.44444	0		6	6.44444	0	0
1995-03-26	6.66667	-2.77778		6.22222	5.66667	0	0
1995-03-27	6.11111	-1.66667		9.33333	4.11111	0	0
1995-03-28	8.33333	-2.77778		8.22222	6.33333	0	0
1995-03-29	7.77778	-2.77778		7.22222	4.77778	0	0
1995-03-30	12.2222	-1.66667		7.33333	7.22222	0	0
1995-03-31	16.6667	-1.66667		3.33333	7.66667	0	0
1995-04-01	9.44444	1.66667		4.66667	-2.55556	0	1
1995-04-02	7.77778	4.44444		6.44444	5.77778	0	0
1995-04-03	12.2222	5.55556		10.5556	5.22222	0	0
1995-04-04	13.8889	0.555556		2.55556	7.88889	0	0
1995-04-05	13.3333	5		6	5.33333	0	0
1995-04-06	12.2222	5		7	6.22222	0	0
1995-04-07	9.44444	3.33333		5.33333	7.44444	0	0
1995-04-08	7.77778	1.66667		3.66667	5.77778	0	0
1995-04-09	3.88889	1.66667		5.66667	3.88889	0	0
1995-04-10	11.1111	0.555556		4.55556	10.1111	0	0
1995-04-11	10.5556	1.66667		6.66667	1.55556	0	0
1995-04-12	11.1111	-0.555556		4.44444	7.11111	0	0
1995-04-13	10	3.33333		9.33333	4	0	0
1995-04-14	7.22222	3.33333		7.33333	2.22222	0	0
1995-04-15	7.22222	0		7	8.22222	0	0
1995-04-16	11.6667	-3.33333		4.66667	10.6667	0	0
1995-04-17	12.2222	-2.22222		6.77778	4.22222	0	0
1995-04-18	13.8889	1.11111		7.11111	2.88889	0	0
1995-04-19	12.2222	1.11111		5.11111	5.22222	0	0
1995-04-20	8.88889	-1.11111		2.88889	3.88889	0	0
1995-04-21	10	2.77778		7.77778	2	0	0
1995-04-22	12.2222	3.88889		7.88889	6.22222	0	0
1995-04-23	13.8889	2.77778		5.77778	3.88889	0	0
1995-04-24	14.4444	3.33333		6.33333	5.44444	0	0
1995-04-25	13.8889	5		6	5.88889	0	0
1995-04-26	13.8889	0.555556		4.55556	7.88889	0	0
1995-04-27	15	7.22222		12.2222	4	0	0
1995-04-28	12.2222	6.66667		8.66667	7.22222	0	0
1995-04-29	11.1111	2.77778		7.77778	6.11111	0	0
1995-04-30	12.7778	4.44444		11.4444	11.7778	0	0
1995-05-01	16.1111	0		4	9.11111	0	0
1995-05-02	15.5556	5.55556		8.55556	5.55556	0	0
1995-05-03	12.7778	6.11111		7.11111	8.77778	0	0
1995-05-04	18.3333	2.77778		2.77778	11.3333	0	0
1995-05-05	16.6667	7.22222		7.22222	6.66667	0	0
1995-05-06	13.3333	7.22222		4.22222	9.33333	0	0
1995-05-07	15	6.11111		6.11111	7	0	0
1995-05-08	17.2222	5.55556		5.55556	8.22222	0	0
1995-05-09	20.5556	5		3	14.5556	0	0
1995-05-10	19.4444	6.66667		3.66667	7.44444	0	0
1995-05-11	13.8889	8.33333		5.33333	3.88889	0	0
1995-05-12	12.2222	5		5	8.22222	0	0
1995-05-13	15.5556	1.66667		3.66667	13.5556	0	0
1995-05-14	17.7778	1.11111		5.11111	7.77778	0	0
1995-05-15	18.8889	10.5556		11.5556	4.88889	0	0
1995-05-16	20	8.33333		6.33333	9	0	0
1995-05-17	15.5556	6.66667		4.66667	1.55556	0	0
1995-05-18	17.2222	8.33333		5.33333	9.22222	0	0
1995-05-19	17.2222	5		4	4.22222	0	0
1995-05-20	20	3.33333		3.33333	9	0	0
1995-05-21	19.4444	9.44444		8.44444	6.44444	0	0
1995-05-22	19.4444	2.77778		2.77778	8.44444	0	0
1995-05-23	18.8889	3.33333		4.33333	6.88889	0	0
1995-05-24	18.8889	9.44444		9.44444	5.88889	0	0
1995-05-25	16.6667	10		8	4.66667	0	0
1995-05-26	12.7778	3.33333		6.33333	7.77778	0	0
1995-05-27	18.3333	2.77778		5.77778	9.33333	0	0
1995-05-28	20.5556	5.55556		5.55556	6.55556	0	0
1995-05-29	23.8889	8.88889		4.88889	5.88889	0	0
1995-05-30	27.2222	10.5556		2.55556	7.22222	0	0
1995-05-31	26.6667	13.3333		5.33333	7.66667	0	0
1995-06-01	25.5556	9.44444		3.44444	7.55556	0	0
1995-06-02	24.4444	12.2222		6.22222	5.44444	0	0
1995-06-03	20.5556	12.2222		6.22222	1.55556	0	0
1995-06-04	20	12.2222		6.22222	7	0	0
1995-06-05	18.3333	11.1111		5.11111	7.33333	0	0
1995-06-06	17.2222	13.3333		13.3333	9.22222	0	0
1995-06-07	15.5556	3.33333		5.33333	13.5556	0	0
1995-06-08	12.7778	3.88889		4.88889	7.77778	0	0
1995-06-09	15	6.66667		6.66667	9	0	0
1995-06-10	21.1111	4.44444		3.44444	10.1111	0	0
1995-06-11	19.4444	10		9	2.44444	0	0
1995-06-12	23.8889	7.22222		3.22222	9.88889	0	0
1995-06-13	21.6667	11.6667		7.66667	3.66667	0	0
1995-06-14	20	8.88889		3.88889	6	0	0
1995-06-15	17.7778	8.88889		4.88889	0.777778	0	0
1995-06-16	17.7778	8.88889		3.88889	3.77778	0	0
1995-06-17	20	11.1111		5.11111	1	0	0
1995-06-18	18.3333	8.88889		4.88889	7.33333	0	0
1995-06-19	17.7778	9.44444		5.44444	4.77778	0	0
1995-06-20	11.6667	8.33333		8.33333	2.66667	0	0
1995-06-21	16.1111	8.33333		8.33333	13.1111	0	0
1995-06-22	15.5556	9.44444		7.44444	8.55556	0	0
1995-06-23	21.1111	11.1111		8.11111	14.1111	0	0
1995-06-24	24.4444	10		5	9.44444	0	0
1995-06-25	27.7778	11.6667		4.66667	8.77778	0	0
1995-06-26	28.8889	11.6667		3.66667	7.88889	0	0
1995-06-27	26.6667	7.22222		3.22222	5.66667	0	0
1995-06-28	18.8889	5		4	12.8889	0	0
1995-06-29	23.8889	11.6667		10.6667	9.88889	0	0
1995-06-30	23.3333	2.77778		-2.22222	7.33333	1	0
1995-07-01	24.4444	11.1111		5.11111	4.44444	0	0
1995-07-02	24.4444	12.7778		3.77778	2.44444	0	0
1995-07-03	15	11.1111		5.11111	-1	0	1
1995-07-04	18.3333	11.6667		5.66667	10.3333	0	0
1995-07-05	22.7778	9.44444		4.44444	12.7778	0	0
1995-07-06	25	10.5556		6.55556	6	0	0
1995-07-07	25	11.1111		4.11111	3	0	0
1995-07-08	28.8889	12.2222		5.22222	9.88889	0	0
1995-07-09	29.4444	15.5556		5.55556	3.44444	0	0
1995-07-10	26.6667	15		4	1.66667	0	0
1995-07-11	25	13.3333		5.33333	4	0	0
1995-07-12	21.6667	13.3333		6.33333	4.66667	0	0
1995-07-13	20	11.6667		3.66667	4	0	0
1995-07-14	23.8889	10		3	5.88889	0	0
1995-07-15	22.7778	12.7778		6.77778	3.77778	0	0
1995-07-16	25.5556	10		3	7.55556	0	0
1995-07-17	27.2222	11.6667		3.66667	6.22222	0	0
1995-07-18	28.3333	12.2222		2.22222	5.33333	0	0
1995-07-19	27.2222	13.8889		2.88889	3.22222	0	0
1995-07-20	26.6667	13.8889		3.88889	4.66667	0	0
1995-07-21	26.6667	16.1111		5.11111	4.66667	0	0
1995-07-22	20.5556	12.7778		4.77778	4.55556	0	0
1995-07-23	24.4444	14.4444		8.44444	8.44444	0	0
1995-07-24	24.4444	13.3333		5.33333	4.44444	0	0
1995-07-25	25.5556	13.3333		5.33333	6.55556	0	0
1995-07-26	26.1111	12.2222		5.22222	4.11111	0	0
1995-07-27	23.3333	17.2222		9.22222	10.3333	0	0
1995-07-28	24.4444	10		3	8.44444	0	0
1995-07-29	26.1111	15.5556		8.55556	2.11111	0	0
1995-07-30	19.4444	13.8889		7.88889	3.44444	0	0
1995-07-31	23.8889	9.44444		5.44444	9.88889	0	0
1995-08-01	27.2222	10		7	9.22222	0	0
1995-08-02	26.1111	15.5556		8.55556	4.11111	0	0
1995-08-03	26.6667	13.3333		4.33333	8.66667	0	0
1995-08-04	29.4444	12.2222		4.22222	9.44444	0	0
1995-08-05	30	14.4444		5.44444	8	0	0
1995-08-06	28.3333	19.4444		8.44444	3.33333	0	0
1995-08-07	26.1111	13.3333		2.33333	4.11111	0	0
1995-08-08	14.4444	11.1111		8.11111	-1.55556	0	1
1995-08-09	22.7778	8.33333		5.33333	17.7778	0	0
1995-08-10	27.2222	8.88889		6.88889	12.2222	0	0
1995-08-11	25	13.3333		6.33333	6	0	0
1995-08-12	20	10.5556		5.55556	10	0	0
1995-08-13	15.5556	7.77778		4.77778	3.55556	0	0
1995-08-14	23.3333	7.22222		5.22222	17.3333	0	0
1995-08-15	23.3333	12.7778		10.7778	7.33333	0	0
1995-08-16	16.6667	8.88889		2.88889	9.66667	0	0
1995-08-17	16.1111	10		5	5.11111	0	0
1995-08-18	18.3333	7.77778		5.77778	11.3333	0	0
1995-08-19	22.7778	6.66667		4.66667	14.7778	0	0
1995-08-20	23.3333	7.77778		5.77778	7.33333	0	0
1995-08-21	25	9.44444		3.44444	6	0	0
1995-08-22	28.8889	11.1111		1.11111	5.88889	0	0
1995-08-23	26.1111	14.4444		4.44444	4.11111	0	0
1995-08-24	26.6667	14.4444		3.44444	4.66667	0	0
1995-08-25	22.7778	7.77778		2.77778	7.77778	0	0
1995-08-26	23.8889	8.33333		5.33333	8.88889	0	0
1995-08-27	24.4444	7.77778		0.777778	7.44444	0	0
1995-08-28	25	8.33333		4.33333	9	0	0
1995-08-29	23.3333	11.6667		2.66667	2.33333	0	0
1995-08-30	22.7778	7.22222		4.22222	9.77778	0	0
1995-08-31	23.8889	7.22222		3.22222	10.8889	0	0
1995-09-01	25	8.33333		4.33333	9	0	0
1995-09-02	27.2222	8.33333		-0.666667	7.22222	1	0
1995-09-03	22.7778	10		0	1.77778	0	0
1995-09-04	24.4444	12.7778		1.77778	1.44444	0	0
1995-09-05	21.1111	14.4444		4.44444	-0.888889	0	1
1995-09-06	24.4444	10		4	12.4444	0	0
1995-09-07	22.7778	14.4444		8.44444	6.77778	0	0
1995-09-08	18.8889	9.44444		2.44444	5.88889	0	0
1995-09-09	19.4444	8.33333		4.33333	7.44444	0	0
1995-09-10	20	7.77778		3.77778	6	0	0
1995-09-11	25	10.5556		4.55556	12	0	0
1995-09-12	25	11.1111		4.11111	8	0	0
1995-09-13	24.4444	12.2222		5.22222	7.44444	0	0
1995-09-14	25.5556	9.44444		0.444444	8.55556	0	0
1995-09-15	25.5556	10.5556		2.55556	8.55556	0	0
1995-09-16	23.3333	10.5556		4.55556	5.33333	0	0
1995-09-17	26.6667	9.44444		4.44444	11.6667	0	0
1995-09-18	25	8.33333		0.333333	7	0	0
1995-09-19	12.7778	6.11111		7.11111	3.77778	0	0
1995-09-20	13.8889	4.44444		4.44444	8.88889	0	0
1995-09-21	13.3333	0		4	9.33333	0	0
1995-09-22	13.8889	2.22222		7.22222	8.88889	0	0
1995-09-23	19.4444	3.88889		3.88889	12.4444	0	0
1995-09-24	20.5556	-1.11111		-3.11111	10.5556	1	0
1995-09-25	17.7778	4.44444		3.44444	6.77778	0	0
1995-09-26	19.4444	4.44444		0.444444	4.44444	0	0
1995-09-27	18.3333	6.11111		4.11111	7.33333	0	0
1995-09-28	17.7778	5.55556		3.55556	12.7778	0	0
1995-09-29	17.7778	5.55556		2.55556	9.77778	0	0
1995-09-30	12.2222	6.66667		4.66667	8.22222	0	0
1995-10-01	12.7778	6.66667		5.66667	9.77778	0	0
1995-10-02	11.1111	2.77778		5.77778	10.1111	0	0
1995-10-03	10.5556	7.22222		10.2222	10.5556	0	0
1995-10-04	10.5556	3.88889		4.88889	7.55556	0	0
1995-10-05	13.8889	4.44444		6.44444	11.8889	0	0
1995-10-06	12.7778	0.555556		2.55556	9.77778	0	0
1995-10-07	12.2222	0.555556		2.55556	8.22222	0	0
1995-10-08	12.7778	3.33333		4.33333	8.77778	0	0
1995-10-09	11.6667	3.88889		4.88889	6.66667	0	0
1995-10-10	16.1111	7.77778		7.77778	14.1111	0	0
1995-10-11	15	8.33333		8.33333	9	0	0
1995-10-12	11.1111	6.66667		5.66667	6.11111	0	0
1995-10-13	11.6667	4.44444		6.44444	10.6667	0	0
1995-10-14	17.2222	5.55556		7.55556	17.2222	0	0
1995-10-15	17.7778	5		6	10.7778	0	0
1995-10-16	17.2222	8.33333		5.33333	5.22222	0	0
1995-10-17	12.7778	7.77778		5.77778	4.77778	0	0
1995-10-18	11.1111	4.44444		4.44444	9.11111	0	0
1995-10-19	11.6667	0		4	10.6667	0	0
1995-10-20	8.88889	-0.555556		5.44444	8.88889	0	0
1995-10-21	9.44444	3.33333		5.33333	5.44444	0	0
1995-10-22	10.5556	0.555556		4.55556	10.5556	0	0
1995-10-23	8.33333	1.66667		6.66667	9.33333	0	0
1995-10-24	8.88889	3.88889		6.88889	8.88889	0	0
1995-10-25	8.88889	6.66667		9.66667	8.88889	0	0
1995-10-26	9.44444	6.11111		8.11111	9.44444	0	0
1995-10-27	9.44444	5.55556		7.55556	9.44444	0	0
1995-10-28	11.1111	0		4	12.1111	0	0
1995-10-29	10	-1.11111		3.88889	9	0	0
1995-10-30	3.88889	-3.33333		8.66667	8.88889	0	0
1995-10-31	2.22222	-3.33333		8.66667	9.22222	0	0
1995-11-01	0.555556	-5.55556		8.44444	8.55556	0	0
1995-11-02	2.77778	-7.22222		8.77778	11.7778	0	0
1995-11-03	3.33333	-5		9	11.3333	0	0
1995-11-04	2.22222	-5		6	7.22222	0	0
1995-11-05	7.22222	0		11	9.22222	0	0
1995-11-06	3.88889	-0.555556		5.44444	6.88889	0	0
1995-11-07	0	-1.66667		5.33333	4	0	0
1995-11-08	11.6667	0		8	11.6667	0	0
1995-11-09	11.6667	2.77778		2.77778	9.66667	0	0
1995-11-10	3.33333	-7.22222		0.777778	2.33333	0	0
1995-11-11	1.66667	-3.33333		7.66667	8.66667	0	0
1995-11-12	7.22222	1.11111		8.11111	7.22222	0	0
1995-11-13	6.66667	2.77778		5.77778	7.66667	0	0
1995-11-14	13.3333	5.55556		8.55556	10.3333	0	0
1995-11-15	12.7778	1.66667		-0.333333	8.77778	1	0
1995-11-16	12.7778	5		4	6.77778	0	0
1995-11-17	13.3333	4.44444		3.44444	10.3333	0	0
1995-11-18	13.3333	3.88889		2.88889	8.33333	0	0
1995-11-19	9.44444	5.55556		7.55556	4.44444	0	0
1995-11-20	5.55556	-2.77778		3.22222	5.55556	0	0
1995-11-21	2.77778	-3.33333		2.66667	2.77778	0	0
1995-11-22	3.88889	-0.555556		0.444444	-1.11111	0	1
1995-11-23	10.5556	-0.555556		0.444444	10.5556	0	0
1995-11-24	11.1111	-0.555556		-0.555556	9.11111	1	0
1995-11-25	9.44444	6.66667		5.66667	7.44444	0	0
1995-11-26	7.77778	2.22222		4.22222	5.77778	0	0
1995-11-27	3.33333	2.22222		6.22222	5.33333	0	0
1995-11-28	3.88889	0		5	7.88889	0	0
1995-11-29	10.5556	2.77778		7.77778	10.5556	0	0
1995-11-30	10.5556	6.66667		6.66667	8.55556	0	0
1995-12-01	8.33333	5		6	7.33333	0	0
1995-12-02	6.66667	1.11111		6.11111	6.66667	0	0
1995-12-03	5.55556	1.66667		9.66667	9.55556	0	0
1995-12-04	6.66667	-1.11111		6.88889	10.6667	0	0
1995-12-05	1.11111	-2.22222		10.7778	3.11111	0	0
1995-12-06	1.66667	-6.66667		7.33333	7.66667	0	0
1995-12-07	0.555556	-8.88889		2.11111	9.55556	0	0
1995-12-08	-8.88889	-17.2222		6.77778	-0.888889	0	1
1995-12-09	-11.6667	-14.4444		9.55556	8.33333	0	0
1995-12-10	-6.66667	-11.6667		9.33333	-0.666667	0	1
1995-12-11	8.88889	-6.66667		-0.666667	8.88889	1	0
1995-12-12	3.33333	0.555556		1.55556	3.33333	0	0
1995-12-13	9.44444	2.22222		2.22222	7.44444	0	0
1995-12-14	6.66667	2.77778		5.77778	6.66667	0	0
1995-12-15	6.66667	3.33333		6.33333	7.66667	0	0
1995-12-16	5	0		5	7	0	0
1995-12-17	2.77778	-1.66667		5.33333	6.77778	0	0
1995-12-18	2.77778	-3.33333		6.66667	4.77778	0	0
1995-12-19	0	-3.33333		6.66667	7	0	0
1995-12-20	0.555556	-1.11111		7.88889	4.55556	0	0
1995-12-21	1.11111	-0.555556		7.44444	7.11111	0	0
1995-12-22	0	-1.66667		8.33333	6	0	0
1995-12-23	-1.11111	-2.22222		8.77778	6.88889	0	0
1995-12-24	-1.66667	-2.77778		10.2222	6.33333	0	0
1995-12-25	-2.22222	-4.44444		10.5556	3.77778	0	0
1995-12-26	-3.33333	-5		2	-0.333333	0	1
1995-12-27	-3.88889	-5		3	1.11111	0	0
1995-12-28	-3.33333	-5.55556		3.44444	2.66667	0	0
1995-12-29	-1.11111	-3.33333		6.66667	3.88889	0	0
1995-12-30	0.555556	-1.66667		4.33333	4.55556	0	0
1995-12-31	2.22222	0		4	5.22222	0	0
1996-01-01	1.66667	-3.33333		2.66667	5.66667	0	0
1996-01-02	0	-3.33333		7.66667	5	0	0
1996-01-03	6.66667	-2.22222		5.77778	7.66667	0	0
1996-01-04	-2.77778	-9.44444		6.55556	-1.77778	0	1
1996-01-05	-8.33333	-13.8889		5.11111	7.66667	0	0
1996-01-06	-6.66667	-10		9	4.33333	0	0
1996-01-07	-0.555556	-6.66667		4.33333	1.44444	0	0
1996-01-08	6.66667	-0.555556		2.44444	6.66667	0	0
1996-01-09	5.55556	-1.66667		1.33333	6.55556	0	0
1996-01-10	3.33333	0		6	5.33333	0	0
1996-01-11	8.33333	3.33333		8.33333	12.3333	0	0
1996-01-12	7.77778	-2.77778		2.22222	9.77778	0	0
1996-01-13	2.22222	-2.77778		2.22222	1.22222	0	0
1996-01-14	8.88889	2.22222		6.22222	7.88889	0	0
1996-01-15	7.77778	4.44444		7.44444	8.77778	0	0
1996-01-16	6.66667	2.77778		4.77778	6.66667	0	0
1996-01-17	2.77778	-13.3333		5.66667	4.77778	0	0
1996-01-18	-6.11111	-11.1111		11.8889	8.88889	0	0
1996-01-19	-7.22222	-9.44444		7.55556	2.77778	0	0
1996-01-20	-2.22222	-9.44444		3.55556	6.77778	0	0
1996-01-21	2.77778	-5.55556		5.44444	7.77778	0	0
1996-01-22	-1.66667	-7.22222		0.777778	3.33333	0	0
1996-01-23	0	-3.88889		6.11111	8	0	0
1996-01-24	-0.555556	-5.55556		5.44444	8.44444	0	0
1996-01-25	-5.55556	-8.88889		5.11111	3.44444	0	0
1996-01-26	-3.33333	-7.22222		6.77778	5.66667	0	0
1996-01-27	-3.88889	-10.5556		2.44444	5.11111	0	0
1996-01-28	-10.5556	-19.4444		7.55556	-0.555556	0	1
1996-01-29	-15	-20.5556		7.44444	2	0	0
1996-01-30	-17.2222	-25		3	6.77778	0	0
1996-01-31	-15.5556	-19.4444		8.55556	5.44444	0	0
1996-02-01	-14.4444	-19.4444		4.55556	5.55556	0	0
1996-02-02	-16.1111	-21.6667		3.33333	4.88889	0	0
1996-02-03	-13.3333	-22.2222		3.77778	8.66667	0	0
1996-02-04	-10.5556	-20		4	0.444444	0	0
1996-02-05	-4.44444	-10.5556		0.444444	-0.444444	0	1
1996-02-06	6.11111	-5		0	7.11111	0	0
1996-02-07	7.77778	1.11111		4.11111	8.77778	0	0
1996-02-08	11.1111	1.11111		3.11111	10.1111	0	0
1996-02-09	11.6667	3.88889		5.88889	9.66667	0	0
1996-02-10	4.44444	-5.55556		4.44444	2.44444	0	0
1996-02-11	3.33333	-6.66667		5.33333	10.3333	0	0
1996-02-12	2.77778	-6.66667		2.33333	3.77778	0	0
1996-02-13	5.55556	-4.44444		0.555556	4.55556	0	0
1996-02-14	6.11111	-2.77778		0.222222	2.11111	0	0
1996-02-15	6.66667	-3.33333		-0.333333	4.66667	1	0
1996-02-16	5	-4.44444		-0.444444	4	1	0
1996-02-17	2.22222	-2.77778		-0.777778	-1.77778	1	1
1996-02-18	8.33333	0		2	7.33333	0	0
1996-02-19	7.22222	1.66667		3.66667	7.22222	0	0
1996-02-20	7.77778	-1.11111		4.88889	8.77778	0	0
1996-02-21	12.7778	-1.11111		4.88889	12.7778	0	0
1996-02-22	9.44444	0.555556		6.55556	4.44444	0	0
1996-02-23	2.22222	-1.11111		7.88889	8.22222	0	0
1996-02-24	0	-5		6	5	0	0
1996-02-25	-2.77778	-8.88889		7.11111	6.22222	0	0
1996-02-26	-5.55556	-11.6667		10.3333	10.4444	0	0
1996-02-27	-7.22222	-13.3333		9.66667	6.77778	0	0
1996-02-28	-5	-15		9	15	0	0
1996-02-29	-10.5556	-12.2222		10.7778	2.44444	0	0
1996-03-01	4.44444	-8.88889		9.11111	13.4444	0	0
1996-03-02	7.77778	-8.88889		5.11111	10.7778	0	0
1996-03-03	7.22222	-4.44444		6.55556	7.22222	0	0
1996-03-04	-4.44444	-10.5556		3.44444	1.55556	0	0
1996-03-05	-5.55556	-11.6667		7.33333	7.44444	0	0
1996-03-06	-5.55556	-10.5556		10.4444	9.44444	0	0
1996-03-07	-4.44444	-9.44444		6.55556	2.55556	0	0
1996-03-08	-1.11111	-5.55556		10.4444	3.88889	0	0
1996-03-09	2.22222	-6.11111		0.888889	3.22222	0	0
1996-03-10	7.77778	-1.11111		-0.111111	-0.222222	1	1
1996-03-11	8.33333	0.555556		-0.444444	0.333333	1	0
1996-03-12	7.22222	0.555556		0.555556	4.22222	0	0
1996-03-13	11.1111	-1.11111		0.888889	7.11111	0	0
1996-03-14	13.3333	-2.22222		0.777778	7.33333	0	0
1996-03-15	10	-1.11111		2.88889	3	0	0
1996-03-16	7.77778	2.77778		5.77778	7.77778	0	0
1996-03-17	7.77778	0.555556		5.55556	7.77778	0	0
1996-03-18	10	-1.66667		4.33333	9	0	0
1996-03-19	10.5556	-3.33333		2.66667	6.55556	0	0
1996-03-20	10	0		5	0	0	0
1996-03-21	7.77778	-2.77778		2.22222	3.77778	0	0
1996-03-22	5.55556	1.66667		7.66667	1.55556	0	0
1996-03-23	4.44444	-2.77778		7.22222	4.44444	0	0
1996-03-24	1.11111	-13.3333		8.66667	6.11111	0	0
1996-03-25	-0.555556	-11.6667		11.3333	14.4444	0	0
1996-03-26	2.22222	-2.77778		17.2222	6.22222	0	0
1996-03-27	2.22222	-5.55556		8.44444	5.22222	0	0
1996-03-28	1.66667	-7.22222		8.77778	10.6667	0	0
1996-03-29	2.77778	-3.33333		12.6667	4.77778	0	0
1996-03-30	4.44444	-2.22222		8.77778	8.44444	0	0
1996-03-31	3.88889	-3.33333		4.66667	5.88889	0	0
1996-04-01	3.88889	0.555556		8.55556	3.88889	0	0
1996-04-02	8.88889	2.22222		2.22222	6.88889	0	0
1996-04-03	7.22222	-1.11111		3.88889	4.22222	0	0
1996-04-04	9.44444	0		8	6.44444	0	0
1996-04-05	15.5556	-1.66667		5.33333	8.55556	0	0
1996-04-06	17.2222	3.88889		7.88889	7.22222	0	0
1996-04-07	15	5		3	3	0	0
1996-04-08	12.7778	1.11111		-1.88889	4.77778	1	0
1996-04-09	11.6667	0.555556		-3.44444	-2.33333	1	1
1996-04-10	16.6667	6.11111		2.11111	1.66667	0	0
1996-04-11	7.77778	2.77778		4.77778	-0.222222	0	1
1996-04-12	6.66667	0		2	5.66667	0	0
1996-04-13	8.33333	3.33333		7.33333	9.33333	0	0
1996-04-14	12.2222	0		5	9.22222	0	0
1996-04-15	14.4444	0		6	4.44444	0	0
1996-04-16	16.1111	2.77778		4.77778	3.11111	0	0
1996-04-17	11.6667	4.44444		5.44444	1.66667	0	0
1996-04-18	8.88889	-2.22222		1.77778	1.88889	0	0
1996-04-19	9.44444	1.66667		7.66667	4.44444	0	0
1996-04-20	7.77778	-1.66667		4.33333	3.77778	0	0
1996-04-21	8.33333	1.66667		7.66667	2.33333	0	0
1996-04-22	12.7778	-1.11111		3.88889	8.77778	0	0
1996-04-23	12.7778	6.66667		11.6667	2.77778	0	0
1996-04-24	11.1111	5		5	9.11111	0	0
1996-04-25	7.77778	3.33333		6.33333	5.77778	0	0
1996-04-26	8.88889	3.88889		6.88889	6.88889	0	0
1996-04-27	7.22222	1.66667		5.66667	2.22222	0	0
1996-04-28	11.1111	-1.66667		3.33333	8.11111	0	0
1996-04-29	11.1111	5.55556		11.5556	3.11111	0	0
1996-04-30	11.6667	1.66667		3.66667	7.66667	0	0
1996-05-01	9.44444	3.33333		5.33333	2.44444	0	0
1996-05-02	8.33333	0.555556		3.55556	7.33333	0	0
1996-05-03	7.77778	0		4	3.77778	0	0
1996-05-04	7.22222	1.11111		7.11111	3.22222	0	0
1996-05-05	11.1111	-1.66667		4.33333	11.1111	0	0
1996-05-06	12.7778	-1.66667		4.33333	4.77778	0	0
1996-05-07	11.1111	0		5	3.11111	0	0
1996-05-08	11.1111	0.555556		4.55556	2.11111	0	0
1996-05-09	9.44444	0.555556		6.55556	3.44444	0	0
1996-05-10	11.6667	-1.11111		4.88889	8.66667	0	0
1996-05-11	12.7778	3.88889		8.88889	4.77778	0	0
1996-05-12	12.2222	5.55556		7.55556	3.22222	0	0
1996-05-13	13.8889	6.66667		5.66667	7.88889	0	0
1996-05-14	13.8889	7.77778		4.77778	7.88889	0	0
1996-05-15	12.7778	5.55556		3.55556	8.77778	0	0
1996-05-16	12.2222	6.11111		4.11111	7.22222	0	0
1996-05-17	13.8889	6.11111		5.11111	6.88889	0	0
1996-05-18	13.3333	7.22222		6.22222	5.33333	0	0
1996-05-19	12.7778	6.66667		5.66667	3.77778	0	0
1996-05-20	12.7778	7.22222		7.22222	6.77778	0	0
1996-05-21	15	1.66667		2.66667	8	0	0
1996-05-22	12.7778	6.66667		8.66667	-0.222222	0	1
1996-05-23	10	3.33333		3.33333	5	0	0
1996-05-24	16.1111	5		6	11.1111	0	0
1996-05-25	15	3.88889		3.88889	5	0	0
1996-05-26	20	5.55556		5.55556	5	0	0
1996-05-27	20	7.22222		3.22222	4	0	0
1996-05-28	18.3333	8.88889		4.88889	4.33333	0	0
1996-05-29	12.2222	5		4	7.22222	0	0
1996-05-30	12.7778	6.11111		6.11111	6.77778	0	0
1996-05-31	13.8889	8.33333		8.33333	3.88889	0	0
1996-06-01	17.7778	7.77778		7.77778	14.7778	0	0
1996-06-02	21.1111	7.22222		5.22222	10.1111	0	0
1996-06-03	22.7778	8.88889		4.88889	5.77778	0	0
1996-06-04	22.7778	14.4444		7.44444	4.77778	0	0
1996-06-05	17.7778	12.7778		8.77778	6.77778	0	0
1996-06-06	21.1111	6.11111		3.11111	8.11111	0	0
1996-06-07	28.3333	6.11111		2.11111	12.3333	0	0
1996-06-08	27.7778	15		7	5.77778	0	0
1996-06-09	27.7778	12.7778		4.77778	6.77778	0	0
1996-06-10	22.2222	8.88889		4.88889	4.22222	0	0
1996-06-11	21.6667	11.6667		9.66667	6.66667	0	0
1996-06-12	22.2222	7.77778		3.77778	7.22222	0	0
1996-06-13	26.6667	7.77778		4.77778	9.66667	0	0
1996-06-14	24.4444	12.2222		6.22222	4.44444	0	0
1996-06-15	26.1111	11.1111		5.11111	6.11111	0	0
1996-06-16	26.6667	13.3333		6.33333	4.66667	0	0
1996-06-17	26.6667	15		9	5.66667	0	0
1996-06-18	16.1111	7.77778		7.77778	5.11111	0	0
1996-06-19	19.4444	9.44444		11.4444	19.4444	0	0
1996-06-20	17.7778	6.11111		7.11111	5.77778	0	0
1996-06-21	20.5556	6.66667		5.66667	7.55556	0	0
1996-06-22	20.5556	9.44444		5.44444	6.55556	0	0
1996-06-23	16.1111	8.33333		6.33333	11.1111	0	0
1996-06-24	16.1111	10		8	4.11111	0	0
1996-06-25	17.7778	8.33333		5.33333	7.77778	0	0
1996-06-26	21.6667	8.33333		5.33333	7.66667	0	0
1996-06-27	21.6667	12.7778		7.77778	3.66667	0	0
1996-06-28	18.3333	12.2222		7.22222	0.333333	0	0
1996-06-29	21.1111	9.44444		5.44444	13.1111	0	0
1996-06-30	23.3333	8.33333		4.33333	7.33333	0	0
1996-07-01	26.6667	10.5556		5.55556	6.66667	0	0
1996-07-02	28.3333	12.2222		4.22222	6.33333	0	0
1996-07-03	30	13.8889		3.88889	4	0	0
1996-07-04	31.1111	15		3	4.11111	0	0
1996-07-05	25	13.3333		7.33333	4	0	0
1996-07-06	22.2222	10		6	7.22222	0	0
1996-07-07	24.4444	10.5556		7.55556	6.44444	0	0
1996-07-08	27.7778	12.7778		7.77778	7.77778	0	0
1996-07-09	30	12.7778		4.77778	7	0	0
1996-07-10	30.5556	18.8889		7.88889	5.55556	0	0
1996-07-11	25.5556	12.7778		4.77778	3.55556	0	0
1996-07-12	27.7778	11.1111		4.11111	7.77778	0	0
1996-07-13	27.7778	11.6667		2.66667	5.77778	0	0
1996-07-14	28.3333	12.7778		2.77778	6.33333	0	0
1996-07-15	30	13.8889		3.88889	5	0	0
1996-07-16	30	17.7778		5.77778	4	0	0
1996-07-17	28.8889	16.6667		5.66667	3.88889	0	0
1996-07-18	26.6667	14.4444		4.44444	2.66667	0	0
1996-07-19	20.5556	12.7778		8.77778	5.55556	0	0
1996-07-20	20	8.33333		4.33333	9	0	0
1996-07-21	23.3333	10		6	15.3333	0	0
1996-07-22	27.2222	12.2222		8.22222	7.22222	0	0
1996-07-23	27.2222	12.7778		4.77778	6.22222	0	0
1996-07-24	28.3333	16.1111		7.11111	5.33333	0	0
1996-07-25	28.3333	13.3333		2.33333	3.33333	0	0
1996-07-26	27.2222	13.3333		3.33333	7.22222	0	0
1996-07-27	28.8889	13.3333		4.33333	5.88889	0	0
1996-07-28	30	17.2222		5.22222	4	0	0
1996-07-29	31.6667	20		6	5.66667	0	0
1996-07-30	29.4444	16.1111		5.11111	3.44444	0	0
1996-07-31	27.2222	11.1111		3.11111	9.22222	0	0
1996-08-01	27.2222	10.5556		2.55556	4.22222	0	0
1996-08-02	30.5556	15.5556		7.55556	7.55556	0	0
1996-08-03	18.8889	12.2222		7.22222	0.888889	0	0
1996-08-04	18.3333	16.1111		12.1111	12.3333	0	0
1996-08-05	16.6667	11.6667		7.66667	10.6667	0	0
1996-08-06	16.1111	12.7778		11.7778	11.1111	0	0
1996-08-07	25.5556	9.44444		5.44444	18.5556	0	0
1996-08-08	26.1111	9.44444		5.44444	8.11111	0	0
1996-08-09	30	11.6667		2.66667	8	0	0
1996-08-10	30.5556	12.7778		3.77778	7.55556	0	0
1996-08-11	29.4444	13.3333		1.33333	4.44444	0	0
1996-08-12	31.6667	15.5556		2.55556	5.66667	0	0
1996-08-13	28.3333	10.5556		2.55556	6.33333	0	0
1996-08-14	23.3333	13.8889		4.88889	1.33333	0	0
1996-08-15	25.5556	12.2222		3.22222	3.55556	0	0
1996-08-16	28.8889	12.7778		2.77778	6.88889	0	0
1996-08-17	28.8889	16.6667		7.66667	4.88889	0	0
1996-08-18	22.7778	11.6667		5.66667	3.77778	0	0
1996-08-19	22.2222	8.88889		4.88889	6.22222	0	0
1996-08-20	20.5556	11.6667		8.66667	3.55556	0	0
1996-08-21	20	8.88889		4.88889	8	0	0
1996-08-22	22.7778	8.88889		3.88889	7.77778	0	0
1996-08-23	22.7778	8.88889		3.88889	5.77778	0	0
1996-08-24	24.4444	10		1	1.44444	0	0
1996-08-25	27.7778	10.5556		-1.44444	3.77778	1	0
1996-08-26	26.1111	10.5556		-2.44444	2.11111	1	0
1996-08-27	25.5556	13.3333		0.333333	0.555556	0	0
1996-08-28	26.1111	16.1111		4.11111	0.111111	0	0
1996-08-29	23.3333	10.5556		2.55556	3.33333	0	0
1996-08-30	26.1111	11.6667		3.66667	8.11111	0	0
1996-08-31	20.5556	7.77778		-2.22222	-3.44444	1	1
1996-09-01	22.7778	7.77778		3.77778	8.77778	0	0
1996-09-02	20	7.77778		4.77778	8	0	0
1996-09-03	24.4444	11.1111		9.11111	10.4444	0	0
1996-09-04	22.2222	9.44444		4.44444	7.22222	0	0
1996-09-05	20	7.22222		2.22222	11	0	0
1996-09-06	17.2222	8.33333		8.33333	12.2222	0	0
1996-09-07	17.2222	9.44444		9.44444	11.2222	0	0
1996-09-08	20.5556	10		6	9.55556	0	0
1996-09-09	26.1111	10		5	14.1111	0	0
1996-09-10	26.6667	8.88889		2.88889	10.6667	0	0
1996-09-11	23.8889	10		2	4.88889	0	0
1996-09-12	26.6667	12.2222		1.22222	4.66667	0	0
1996-09-13	23.3333	14.4444		3.44444	2.33333	0	0
1996-09-14	21.1111	13.3333		6.33333	3.11111	0	0
1996-09-15	12.2222	7.77778		5.77778	4.22222	0	0
1996-09-16	13.3333	7.77778		5.77778	4.33333	0	0
1996-09-17	13.3333	8.33333		7.33333	8.33333	0	0
1996-09-18	11.6667	7.22222		7.22222	10.6667	0	0
1996-09-19	12.2222	8.33333		8.33333	10.2222	0	0
1996-09-20	12.2222	8.88889		7.88889	10.2222	0	0
1996-09-21	13.3333	7.77778		7.77778	10.3333	0	0
1996-09-22	13.3333	7.22222		7.22222	9.33333	0	0
1996-09-23	12.2222	1.66667		3.66667	11.2222	0	0
1996-09-24	13.3333	1.11111		4.11111	10.3333	0	0
1996-09-25	12.7778	2.22222		5.22222	4.77778	0	0
1996-09-26	13.8889	1.66667		4.66667	6.88889	0	0
1996-09-27	18.3333	6.11111		8.11111	12.3333	0	0
1996-09-28	21.1111	5.55556		4.55556	12.1111	0	0
1996-09-29	24.4444	6.11111		2.11111	11.4444	0	0
1996-09-30	21.6667	10		4	6.66667	0	0
1996-10-01	21.1111	9.44444		3.44444	7.11111	0	0
1996-10-02	16.6667	1.11111		0.111111	6.66667	0	0
1996-10-03	16.1111	3.88889		2.88889	5.11111	0	0
1996-10-04	16.6667	4.44444		-0.555556	3.66667	1	0
1996-10-05	16.6667	9.44444		4.44444	2.66667	0	0
1996-10-06	16.6667	9.44444		6.44444	8.66667	0	0
1996-10-07	17.7778	3.88889		2.88889	8.77778	0	0
1996-10-08	18.8889	5.55556		3.55556	7.88889	0	0
1996-10-09	20	5		1	8	0	0
1996-10-10	21.6667	5.55556		-0.444444	6.66667	1	0
1996-10-11	22.7778	9.44444		1.44444	9.77778	0	0
1996-10-12	17.7778	8.88889		4.88889	5.77778	0	0
1996-10-13	17.7778	7.77778		3.77778	7.77778	0	0
1996-10-14	12.2222	8.33333		7.33333	5.22222	0	0
1996-10-15	11.6667	5.55556		6.55556	10.6667	0	0
1996-10-16	11.1111	3.33333		7.33333	10.1111	0	0
1996-10-17	6.66667	-1.66667		4.33333	9.66667	0	0
1996-10-18	10	3.88889		13.8889	11	0	0
1996-10-19	8.88889	0.555556		4.55556	8.88889	0	0
1996-10-20	3.88889	1.66667		6.66667	5.88889	0	0
1996-10-21	4.44444	-2.22222		4.77778	6.44444	0	0
1996-10-22	9.44444	2.22222		9.22222	11.4444	0	0
1996-10-23	8.88889	3.33333		8.33333	9.88889	0	0
1996-10-24	7.77778	3.88889		7.88889	9.77778	0	0
1996-10-25	7.22222	1.11111		5.11111	5.22222	0	0
1996-10-26	7.22222	-1.11111		3.88889	9.22222	0	0
1996-10-27	7.22222	-1.11111		6.88889	8.22222	0	0
1996-10-28	8.33333	5		12	9.33333	0	0
1996-10-29	6.66667	-1.66667		0.333333	5.66667	0	0
1996-10-30	4.44444	-2.77778		8.22222	4.44444	0	0
1996-10-31	2.77778	-5		7	8.77778	0	0
1996-11-01	4.44444	-1.11111		8.88889	9.44444	0	0
1996-11-02	5.55556	-1.11111		6.88889	7.55556	0	0
1996-11-03	7.77778	-0.555556		3.44444	4.77778	0	0
1996-11-04	7.77778	-0.555556		4.44444	3.77778	0	0
1996-11-05	3.88889	-0.555556		5.44444	6.88889	0	0
1996-11-06	5.55556	-0.555556		7.44444	10.5556	0	0
1996-11-07	6.11111	-0.555556		6.44444	10.1111	0	0
1996-11-08	10	0		10	14	0	0
1996-11-09	9.44444	0.555556		6.55556	9.44444	0	0
1996-11-10	9.44444	-0.555556		0.444444	7.44444	0	0
1996-11-11	8.33333	0.555556		1.55556	4.33333	0	0
1996-11-12	5	1.66667		1.66667	-1	0	1
1996-11-13	7.77778	0		0	1.77778	0	0
1996-11-14	7.77778	1.66667		3.66667	4.77778	0	0
1996-11-15	2.77778	-5		4	4.77778	0	0
1996-11-16	-3.88889	-6.66667		9.33333	5.11111	0	0
1996-11-17	-1.66667	-6.11111		9.88889	4.33333	0	0
1996-11-18	4.44444	0		7	8.44444	0	0
1996-11-19	1.66667	-11.6667		1.33333	5.66667	0	0
1996-11-20	-1.11111	-14.4444		1.55556	1.88889	0	0
1996-11-21	-1.11111	-8.88889		4.11111	6.88889	0	0
1996-11-22	-3.88889	-6.66667		5.33333	-2.88889	0	1
1996-11-23	-2.77778	-6.66667		2.33333	-2.77778	0	1
1996-11-24	-2.77778	-4.44444		6.55556	3.22222	0	0
1996-11-25	-1.11111	-2.77778		5.22222	1.88889	0	0
1996-11-26	0.555556	-2.22222		3.77778	4.55556	0	0
1996-11-27	0.555556	-1.11111		5.88889	5.55556	0	0
1996-11-28	6.11111	-1.11111		4.88889	7.11111	0	0
1996-11-29	3.88889	-0.555556		4.44444	3.88889	0	0
1996-11-30	2.22222	-2.22222		5.77778	7.22222	0	0
1996-12-01	5	0		9	9	0	0
1996-12-02	2.77778	-1.11111		5.88889	5.77778	0	0
1996-12-03	1.66667	-2.22222		6.77778	8.66667	0	0
1996-12-04	1.66667	-6.11111		3.88889	8.66667	0	0
1996-12-05	3.33333	-2.77778		9.22222	7.33333	0	0
1996-12-06	2.77778	-0.555556		6.44444	6.77778	0	0
1996-12-07	2.77778	0		7	8.77778	0	0
1996-12-08	5.55556	0		8	8.55556	0	0
1996-12-09	7.22222	0.555556		3.55556	7.22222	0	0
1996-12-10	6.66667	0		4	7.66667	0	0
1996-12-11	5	1.11111		4.11111	4	0	0
1996-12-12	2.77778	-1.66667		7.33333	5.77778	0	0
1996-12-13	-1.11111	-2.77778		4.22222	3.88889	0	0
1996-12-14	1.11111	-1.66667		7.33333	4.11111	0	0
1996-12-15	2.22222	-1.66667		7.33333	8.22222	0	0
1996-12-16	2.77778	-7.22222		1.77778	9.77778	0	0
1996-12-17	-6.66667	-13.3333		2.66667	0.333333	0	0
1996-12-18	-6.66667	-8.33333		9.66667	6.33333	0	0
1996-12-19	-3.88889	-7.77778		7.22222	7.11111	0	0
1996-12-20	1.66667	-5.55556		6.44444	7.66667	0	0
1996-12-21	-0.555556	-10.5556		3.44444	4.44444	0	0
1996-12-22	-10.5556	-13.8889		2.11111	-2.55556	0	1
1996-12-23	-10.5556	-15		-1	-2.55556	1	1
1996-12-24	-7.22222	-10.5556		4.44444	2.77778	0	0
1996-12-25	-7.77778	-12.7778		-0.777778	2.22222	1	0
1996-12-26	-10.5556	-17.2222		3.77778	0.444444	0	0
1996-12-27	-9.44444	-12.7778		5.22222	0.555556	0	0
1996-12-28	-2.77778	-12.2222		0.777778	2.22222	0	0
1996-12-29	-4.44444	-11.1111		2.88889	2.55556	0	0
1996-12-30	7.22222	-10.5556		2.44444	8.22222	0	0
1996-12-31	8.33333	0.555556		2.55556	8.33333	0	0
1997-01-01	7.77778	1.11111		2.11111	6.77778	0	0
1997-01-02	7.77778	1.66667		3.66667	4.77778	0	0
1997-01-03	6.66667	0.555556		2.55556	6.66667	0	0
1997-01-04	2.22222	-2.22222		4.77778	4.22222	0	0
1997-01-05	-1.11111	-5.55556		6.44444	4.88889	0	0
1997-01-06	-0.555556	-5		7	7.44444	0	0
1997-01-07	3.88889	-1.11111		9.88889	10.8889	0	0
1997-01-08	4.44444	2.77778		9.77778	8.44444	0	0
1997-01-09	3.88889	0.555556		5.55556	6.88889	0	0
1997-01-10	3.33333	0		5	6.33333	0	0
1997-01-11	0	-8.88889		0.111111	1	0	0
1997-01-12	-8.33333	-16.1111		4.88889	0.666667	0	0
1997-01-13	-11.1111	-16.1111		3.88889	0.888889	0	0
1997-01-14	-10.5556	-13.3333		3.66667	-4.55556	0	1
1997-01-15	-8.88889	-12.2222		2.77778	0.111111	0	0
1997-01-16	-8.33333	-10		5	-0.333333	0	1
1997-01-17	-6.11111	-8.88889		7.11111	1.88889	0	0
1997-01-18	-1.66667	-6.11111		1.88889	0.333333	0	0
1997-01-19	0	-2.77778		-0.777778	0	1	0
1997-01-20	-0.555556	-2.77778		-0.777778	-2.55556	1	1
1997-01-21	3.33333	-2.22222		0.777778	0.333333	0	0
1997-01-22	1.11111	-3.33333		2.66667	4.11111	0	0
1997-01-23	0.555556	-1.11111		6.88889	3.55556	0	0
1997-01-24	0	-12.7778		-3.77778	8	1	0
1997-01-25	-12.7778	-17.2222		-3.22222	-3.77778	1	1
1997-01-26	-8.88889	-16.1111		1.88889	1.11111	0	0
1997-01-27	-10.5556	-17.7778		2.22222	2.44444	0	0
1997-01-28	-5.55556	-11.6667		8.33333	1.44444	0	0
1997-01-29	-2.22222	-11.1111		-2.11111	1.77778	1	0
1997-01-30	8.33333	-2.77778		2.22222	10.3333	0	0
1997-01-31	6.66667	1.11111		4.11111	6.66667	0	0
1997-02-01
1997-02-02
1997-02-03
1997-02-04
1997-02-05
1997-02-06
1997-02-07
1997-02-08
1997-02-09
1997-02-10
1997-02-11
1997-02-12
1997-02-13
1997-02-14
1997-02-15
1997-02-16
1997-02-17
1997-02-18
1997-02-19
1997-02-20
1997-02-21
1997-02-22
1997-02-23
1997-02-24
1997-02-25
1997-02-26
1997-02-27
1997-02-28
1997-03-01	1.66667	-8.88889		7.11111	6.66667	0	0
1997-03-02	3.33333	-2.77778		6.22222	7.33333	0	0
1997-03-03	3.33333	-2.77778		4.22222	6.33333	0	0
1997-03-04	3.88889	-2.77778		6.22222	3.88889	0	0
1997-03-05	2.22222	-2.22222		7.77778	10.2222	0	0
1997-03-06	5.55556	-1.66667		8.33333	9.55556	0	0
1997-03-07	6.11111	1.11111		6.11111	9.11111	0	0
1997-03-08	4.44444	-0.555556		7.44444	5.44444	0	0
1997-03-09	5	-0.555556		9.44444	9	0	0
1997-03-10	3.88889	-0.555556		8.44444	5.88889	0	0
1997-03-11	3.33333	-1.11111		4.88889	7.33333	0	0
1997-03-12	1.66667	-3.88889		2.11111	-1.33333	0	1
1997-03-13	-2.77778	-11.1111		-1.11111	-4.77778	1	1
1997-03-14	-2.22222	-10.5556		7.44444	6.77778	0	0
1997-03-15	-4.44444	-10.5556		6.44444	-2.44444	0	1
1997-03-16	7.77778	-5		12	7.77778	0	0
1997-03-17	8.33333	0.555556		1.55556	7.33333	0	0
1997-03-18	8.88889	0.555556		5.55556	6.88889	0	0
1997-03-19	14.4444	1.66667		3.66667	9.44444	0	0
1997-03-20	13.8889	2.22222		0.222222	6.88889	0	0
1997-03-21	8.88889	0.555556		6.55556	3.88889	0	0
1997-03-22	11.6667	-0.555556		4.44444	7.66667	0	0
1997-03-23	11.1111	3.33333		10.3333	3.11111	0	0
1997-03-24	7.77778	-2.77778		4.22222	8.77778	0	0
1997-03-25	15.5556	1.11111		11.1111	9.55556	0	0
1997-03-26	13.8889	8.33333		14.3333	3.88889	0	0
1997-03-27	10	1.66667		4.66667	5	0	0
1997-03-28	5.55556	2.22222		10.2222	8.55556	0	0
1997-03-29	6.11111	2.22222		9.22222	10.1111	0	0
1997-03-30	10	-1.66667		6.33333	14	0	0
1997-03-31	5	-1.66667		6.33333	-5	0	1
1997-04-01	4.44444	-1.11111		6.88889	5.44444	0	0
1997-04-02	10	-2.22222		5.77778	14	0	0
1997-04-03	8.88889	1.11111		8.11111	1.88889	0	0
1997-04-04	3.88889	-2.22222		4.77778	4.88889	0	0
1997-04-05	5.55556	-3.88889		8.11111	11.5556	0	0
1997-04-06	7.77778	-3.88889		8.11111	7.77778	0	0
1997-04-07	7.22222	-2.77778		11.2222	3.22222	0	0
1997-04-08	5.55556	-5.55556		7.44444	7.55556	0	0
1997-04-09	4.44444	-2.77778		10.2222	6.44444	0	0
1997-04-10	3.88889	-3.88889		8.11111	7.88889	0	0
1997-04-11	4.44444	-4.44444		8.55556	10.4444	0	0
1997-04-12	9.44444	-4.44444		8.55556	0.444444	0	0
1997-04-13	8.88889	-2.22222		8.77778	-4.11111	0	1
1997-04-14	7.77778	3.33333		10.3333	3.77778	0	0
1997-04-15	9.44444	1.11111		6.11111	8.44444	0	0
1997-04-16	16.1111	0.555556		5.55556	6.11111	0	0
1997-04-17	16.1111	7.77778		8.77778	5.11111	0	0
1997-04-18	13.3333	0		3	1.33333	0	0
1997-04-19	11.1111	3.33333		6.33333	5.11111	0	0
1997-04-20	10	4.44444		4.44444	8	0	0
1997-04-21	11.6667	4.44444		6.44444	9.66667	0	0
1997-04-22	13.3333	-1.11111		2.88889	5.33333	0	0
1997-04-23	12.7778	1.66667		5.66667	-0.222222	0	1
1997-04-24	14.4444	5.55556		6.55556	10.4444	0	0
1997-04-25	13.8889	3.33333		4.33333	5.88889	0	0
1997-04-26	16.1111	1.66667		4.66667	9.11111	0	0
1997-04-27	15	4.44444		5.44444	4	0	0
1997-04-28	9.44444	5.55556		7.55556	3.44444	0	0
1997-04-29	9.44444	3.33333		6.33333	3.44444	0	0
1997-04-30	11.1111	3.33333		5.33333	6.11111	0	0
1997-05-01	10	3.33333		5.33333	3	0	0
1997-05-02	13.3333	2.22222		5.22222	9.33333	0	0
1997-05-03	16.1111	0.555556		5.55556	6.11111	0	0
1997-05-04	15	4.44444		7.44444	6	0	0
1997-05-05	16.1111	1.11111		3.11111	12.1111	0	0
1997-05-06	14.4444	5.55556		7.55556	-1.55556	0	1
1997-05-07	11.1111	3.33333		3.33333	4.11111	0	0
1997-05-08	16.6667	-0.555556		1.44444	8.66667	0	0
1997-05-09	19.4444	-0.555556		2.44444	4.44444	0	0
1997-05-10	22.7778	6.66667		4.66667	4.77778	0	0
1997-05-11	22.7778	6.66667		3.66667	7.77778	0	0
1997-05-12	22.2222	4.44444		1.44444	8.22222	0	0
1997-05-13	23.3333	7.77778		4.77778	7.33333	0	0
1997-05-14	23.3333	7.22222		2.22222	7.33333	0	0
1997-05-15	25	7.22222		3.22222	8	0	0
1997-05-16	25	10.5556		4.55556	7	0	0
1997-05-17	25	5.55556		-0.444444	7	1	0
1997-05-18	15	5.55556		5.55556	3	0	0
1997-05-19	20	1.66667		4.66667	13	0	0
1997-05-20	21.1111	6.11111		7.11111	9.11111	0	0
1997-05-21	20	2.22222		2.22222	6	0	0
1997-05-22	18.3333	6.66667		7.66667	4.33333	0	0
1997-05-23	19.4444	9.44444		6.44444	7.44444	0	0
1997-05-24	16.6667	7.77778		5.77778	4.66667	0	0
1997-05-25	8.33333	4.44444		4.44444	4.33333	0	0
1997-05-26	15	6.11111		6.11111	11	0	0
1997-05-27	15.5556	8.33333		8.33333	7.55556	0	0
1997-05-28	20.5556	6.11111		4.11111	10.5556	0	0
1997-05-29	20.5556	6.11111		3.11111	6.55556	0	0
1997-05-30	20.5556	10		6	7.55556	0	0
1997-05-31	17.2222	8.33333		3.33333	6.22222	0	0
1997-06-01	20	11.1111		6.11111	4	0	0
1997-06-02	18.3333	11.1111		9.11111	11.3333	0	0
1997-06-03	18.3333	6.66667		4.66667	5.33333	0	0
1997-06-04	17.2222	10.5556		4.55556	1.22222	0	0
1997-06-05	16.1111	11.1111		6.11111	3.11111	0	0
1997-06-06	15.5556	10		6	6.55556	0	0
1997-06-07	21.1111	7.22222		4.22222	12.1111	0	0
1997-06-08	22.2222	10.5556		7.55556	6.22222	0	0
1997-06-09	23.8889	11.1111		6.11111	8.88889	0	0
1997-06-10	23.3333	11.1111		6.11111	4.33333	0	0
1997-06-11	19.4444	12.7778		5.77778	1.44444	0	0
1997-06-12	20	11.6667		7.66667	12	0	0
1997-06-13	21.1111	10.5556		6.55556	7.11111	0	0
1997-06-14	23.3333	11.1111		5.11111	7.33333	0	0
1997-06-15	25	12.2222		6.22222	8	0	0
1997-06-16	21.1111	12.2222		6.22222	2.11111	0	0
1997-06-17	22.2222	12.2222		6.22222	9.22222	0	0
1997-06-18	19.4444	12.2222		7.22222	6.44444	0	0
1997-06-19	17.7778	9.44444		7.44444	6.77778	0	0
1997-06-20	16.6667	7.77778		5.77778	8.66667	0	0
1997-06-21	22.7778	6.11111		4.11111	10.7778	0	0
1997-06-22	17.7778	6.11111		5.11111	1.77778	0	0
1997-06-23	15	6.11111		5.11111	5	0	0
1997-06-24	14.4444	8.88889		7.88889	7.44444	0	0
1997-06-25	20	6.11111		5.11111	16	0	0
1997-06-26	22.2222	7.77778		5.77778	6.22222	0	0
1997-06-27	21.6667	7.77778		3.77778	4.66667	0	0
1997-06-28	23.8889	8.33333		6.33333	7.88889	0	0
1997-06-29	21.6667	6.66667		1.66667	2.66667	0	0
1997-06-30	16.6667	6.11111		3.11111	7.66667	0	0
1997-07-01	16.6667	9.44444		7.44444	7.66667	0	0
1997-07-02	16.1111	8.88889		6.88889	8.11111	0	0
1997-07-03	20.5556	7.77778		4.77778	6.55556	0	0
1997-07-04	22.2222	9.44444		6.44444	5.22222	0	0
1997-07-05	25.5556	11.6667		5.66667	4.55556	0	0
1997-07-06	21.6667	16.1111		8.11111	-2.33333	0	1
1997-07-07	23.3333	11.6667		5.66667	8.33333	0	0
1997-07-08	25.5556	11.6667		5.66667	8.55556	0	0
1997-07-09	25.5556	15		9	4.55556	0	0
1997-07-10	17.7778	10.5556		4.55556	7.77778	0	0
1997-07-11	18.3333	11.1111		9.11111	11.3333	0	0
1997-07-12	20	10		8	10	0	0
1997-07-13	21.1111	10		6	9.11111	0	0
1997-07-14	27.7778	12.2222		5.22222	10.7778	0	0
1997-07-15	28.3333	12.2222		4.22222	6.33333	0	0
1997-07-16	28.3333	14.4444		6.44444	5.33333	0	0
1997-07-17	28.3333	13.3333		5.33333	6.33333	0	0
1997-07-18	28.3333	13.3333		5.33333	15.3333	0	0
1997-07-19	26.1111	15		7	6.11111	0	0
1997-07-20	21.1111	13.8889		6.88889	2.11111	0	0
1997-07-21	27.2222	12.2222		6.22222	17.2222	0	0
1997-07-22	27.2222	14.4444		8.44444	11.2222	0	0
1997-07-23	26.1111	12.2222		3.22222	4.11111	0	0
1997-07-24	25.5556	12.2222		4.22222	6.55556	0	0
1997-07-25	26.1111	12.7778		4.77778	6.11111	0	0
1997-07-26	26.6667	11.6667		3.66667	8.66667	0	0
1997-07-27	26.6667	10.5556		4.55556	8.66667	0	0
1997-07-28	26.6667	13.3333		3.33333	4.66667	0	0
1997-07-29	25	17.7778		5.77778	1	0	0
1997-07-30	24.4444	15		3	0.444444	0	0
1997-07-31	27.2222	11.6667		1.66667	8.22222	0	0
1997-08-01	27.2222	13.3333		3.33333	5.22222	0	0
1997-08-02	26.6667	16.1111		7.11111	4.66667	0	0
1997-08-03	25.5556	13.3333		3.33333	4.55556	0	0
1997-08-04	27.2222	13.3333		1.33333	1.22222	0	0
1997-08-05	28.3333	17.7778		4.77778	0.333333	0	0
1997-08-06	26.1111	14.4444		0.444444	3.11111	0	0
1997-08-07	28.3333	15		1	2.33333	0	0
1997-08-08	21.6667	15.5556		3.55556	-1.33333	0	1
1997-08-09	20.5556	9.44444		3.44444	5.55556	0	0
1997-08-10	24.4444	9.44444		5.44444	13.4444	0	0
1997-08-11	25.5556	9.44444		6.44444	9.55556	0	0
1997-08-12	24.4444	11.6667		3.66667	4.44444	0	0
1997-08-13	26.1111	14.4444		4.44444	4.11111	0	0
1997-08-14	26.6667	12.7778		2.77778	6.66667	0	0
1997-08-15	25	13.3333		3.33333	3	0	0
1997-08-16	22.2222	11.1111		4.11111	6.22222	0	0
1997-08-17	25	12.7778		5.77778	13	0	0
1997-08-18	22.7778	11.6667		4.66667	5.77778	0	0
1997-08-19	25.5556	11.1111		3.11111	8.55556	0	0
1997-08-20	25.5556	11.1111		3.11111	6.55556	0	0
1997-08-21	25.5556	13.3333		3.33333	3.55556	0	0
1997-08-22	29.4444	12.2222		2.22222	10.4444	0	0
1997-08-23	28.8889	12.2222		1.22222	6.88889	0	0
1997-08-24	17.2222	12.2222		1.22222	-6.77778	0	1
1997-08-25	22.7778	10.5556		2.55556	10.7778	0	0
1997-08-26	25	10.5556		5.55556	8	0	0
1997-08-27	25	11.6667		1.66667	2	0	0
1997-08-28	21.1111	11.6667		3.66667	2.11111	0	0
1997-08-29	22.2222	12.2222		5.22222	7.22222	0	0
1997-08-30	22.7778	11.1111		4.11111	8.77778	0	0
1997-08-31	23.8889	8.88889		2.88889	5.88889	0	0
1997-09-01	27.7778	12.7778		2.77778	9.77778	0	0
1997-09-02	25.5556	12.7778		2.77778	4.55556	0	0
1997-09-03	23.8889	15		5	-0.111111	0	1
1997-09-04	22.7778	13.3333		3.33333	3.77778	0	0
1997-09-05	24.4444	10		2	9.44444	0	0
1997-09-06	23.3333	12.7778		4.77778	6.33333	0	0
1997-09-07	20.5556	7.77778		2.77778	9.55556	0	0
1997-09-08	20.5556	8.88889		3.88889	5.55556	0	0
1997-09-09	23.3333	8.33333		0.333333	5.33333	0	0
1997-09-10	22.7778	8.88889		-0.111111	2.77778	1	0
1997-09-11	18.3333	10		0	0.333333	0	0
1997-09-12	17.7778	14.4444		5.44444	5.77778	0	0
1997-09-13	18.8889	7.22222		3.22222	8.88889	0	0
1997-09-14	21.6667	9.44444		6.44444	7.66667	0	0
1997-09-15	12.7778	9.44444		1.44444	-3.22222	0	1
1997-09-16	15	10.5556		6.55556	7	0	0
1997-09-17	14.4444	9.44444		6.44444	9.44444	0	0
1997-09-18	13.3333	7.22222		5.22222	7.33333	0	0
1997-09-19	17.2222	4.44444		3.44444	13.2222	0	0
1997-09-20	18.3333	3.88889		1.88889	11.3333	0	0
1997-09-21	17.7778	5		2	3.77778	0	0
1997-09-22	19.4444	5.55556		-0.444444	1.44444	1	0
1997-09-23	20	6.66667		-0.333333	4	1	0
1997-09-24	21.6667	6.66667		-1.33333	4.66667	1	0
1997-09-25	21.6667	7.77778		-1.22222	1.66667	1	0
1997-09-26	19.4444	11.1111		2.11111	0.444444	0	0
1997-09-27	15	9.44444		5.44444	2	0	0
1997-09-28	17.7778	9.44444		6.44444	13.7778	0	0
1997-09-29	22.2222	8.88889		5.88889	14.2222	0	0
1997-09-30	22.2222	8.33333		3.33333	8.22222	0	0
1997-10-01	22.7778	12.2222		4.22222	5.77778	0	0
1997-10-02	22.7778	10.5556		2.55556	6.77778	0	0
1997-10-03	14.4444	10		6	2.44444	0	0
1997-10-04	15	9.44444		7.44444	10	0	0
1997-10-05	11.1111	9.44444		6.44444	6.11111	0	0
1997-10-06	12.7778	5.55556		4.55556	9.77778	0	0
1997-10-07	12.7778	6.11111		5.11111	8.77778	0	0
1997-10-08	13.8889	2.77778		3.77778	10.8889	0	0
1997-10-09	13.8889	3.33333		6.33333	9.88889	0	0
1997-10-10	10	6.11111		6.11111	6	0	0
1997-10-11	10	0.555556		1.55556	7	0	0
1997-10-12	10	1.66667		3.66667	8	0	0
1997-10-13	10	6.11111		10.1111	10	0	0
1997-10-14	10.5556	3.33333		5.33333	8.55556	0	0
1997-10-15	12.2222	3.88889		2.88889	8.22222	0	0
1997-10-16	12.7778	3.88889		1.88889	2.77778	0	0
1997-10-17	18.3333	3.33333		-1.66667	5.33333	1	0
1997-10-18	19.4444	7.77778		2.77778	6.44444	0	0
1997-10-19	12.2222	2.22222		1.22222	6.22222	0	0
1997-10-20	12.2222	2.77778		1.77778	5.22222	0	0
1997-10-21	11.1111	0.555556		0.555556	4.11111	0	0
1997-10-22	12.2222	2.22222		2.22222	6.22222	0	0
1997-10-23	11.1111	0.555556		0.555556	8.11111	0	0
1997-10-24	9.44444	-1.66667		1.33333	8.44444	0	0
1997-10-25	10	-1.66667		4.33333	11	0	0
1997-10-26	11.6667	-1.66667		3.33333	11.6667	0	0
1997-10-27	10.5556	-1.66667		-0.666667	6.55556	1	0
1997-10-28	9.44444	1.66667		3.66667	7.44444	0	0
1997-10-29	10	7.22222		9.22222	7	0	0
1997-10-30	11.1111	6.11111		5.11111	9.11111	0	0
1997-10-31	8.88889	6.66667		6.66667	5.88889	0	0
1997-11-01	11.6667	6.11111		6.11111	10.6667	0	0
1997-11-02	10	-0.555556		0.444444	9	0	0
1997-11-03	12.2222	0.555556		3.55556	11.2222	0	0
1997-11-04	12.7778	7.77778		8.77778	8.77778	0	0
1997-11-05	11.6667	1.66667		0.666667	6.66667	0	0
1997-11-06	8.33333	0.555556		-0.444444	1.33333	1	0
1997-11-07	7.77778	3.88889		-0.111111	-1.22222	1	1
1997-11-08	8.33333	-1.66667		2.33333	2.33333	0	0
1997-11-09	6.11111	-1.66667		3.33333	7.11111	0	0
1997-11-10	2.77778	-6.66667		-1.66667	3.77778	1	0
1997-11-11	2.77778	-2.77778		4.22222	1.77778	0	0
1997-11-12	3.88889	-8.88889		-3.88889	1.88889	1	0
1997-11-13	2.77778	-12.7778		-7.77778	2.77778	1	0
1997-11-14	2.22222	-6.11111		-2.11111	1.22222	1	0
1997-11-15	-0.555556	-6.11111		-0.111111	0.444444	1	0
1997-11-16	-0.555556	-6.11111		0.888889	2.44444	0	0
1997-11-17	5	-2.22222		3.77778	6	0	0
1997-11-18	6.66667	4.44444		7.44444	8.66667	0	0
1997-11-19	5	-1.66667		1.33333	6	0	0
1997-11-20	6.11111	0.555556		4.55556	7.11111	0	0
1997-11-21	6.66667	0.555556		2.55556	7.66667	0	0
1997-11-22	6.11111	-0.555556		2.44444	7.11111	0	0
1997-11-23	2.22222	-2.77778		3.22222	4.22222	0	0
1997-11-24	8.88889	-2.77778		3.22222	7.88889	0	0
1997-11-25	6.66667	-1.11111		0.888889	5.66667	0	0
1997-11-26	5	-2.77778		1.22222	6	0	0
1997-11-27	3.88889	-2.77778		4.22222	6.88889	0	0
1997-11-28	10.5556	-4.44444		1.55556	12.5556	0	0
1997-11-29	9.44444	0.555556		2.55556	8.44444	0	0
1997-11-30	7.77778	0.555556		2.55556	5.77778	0	0
1997-12-01	6.66667	1.66667		4.66667	6.66667	0	0
1997-12-02	2.77778	-3.88889		3.11111	3.77778	0	0
1997-12-03	0.555556	-1.11111		6.88889	5.55556	0	0
1997-12-04	0.555556	-1.66667		8.33333	5.55556	0	0
1997-12-05	-1.66667	-3.88889		4.11111	0.333333	0	0
1997-12-06	-2.77778	-4.44444		4.55556	2.22222	0	0
1997-12-07	-2.77778	-4.44444		3.55556	0.222222	0	0
1997-12-08	-1.66667	-4.44444		0.555556	-0.666667	0	1
1997-12-09	1.66667	-1.66667		5.33333	2.66667	0	0
1997-12-10	1.11111	-2.77778		5.22222	6.11111	0	0
1997-12-11	2.22222	-1.66667		6.33333	8.22222	0	0
1997-12-12	0	-3.88889		2.11111	4	0	0
1997-12-13	-0.555556	-3.88889		2.11111	0.444444	0	0
1997-12-14	-2.22222	-4.44444		-0.444444	-5.22222	1	1
1997-12-15	6.66667	-2.77778		-1.77778	1.66667	1	0
1997-12-16	7.22222	0		4	7.22222	0	0
1997-12-17	7.77778	4.44444		7.44444	6.77778	0	0
1997-12-18	5	-1.11111		2.88889	4	0	0
1997-12-19	2.77778	-1.66667		4.33333	6.77778	0	0
1997-12-20	1.66667	-2.22222		5.77778	7.66667	0	0
1997-12-21	2.22222	-1.11111		5.88889	5.22222	0	0
1997-12-22	-1.11111	-6.66667		-0.666667	3.88889	1	0
1997-12-23	-0.555556	-6.66667		5.33333	5.44444	0	0
1997-12-24	-1.66667	-2.77778		7.22222	5.33333	0	0
1997-12-25	-1.11111	-3.33333		6.66667	5.88889	0	0
1997-12-26	0	-2.77778		7.22222	7	0	0
1997-12-27	3.33333	-1.66667		7.33333	9.33333	0	0
1997-12-28	5	0		7	10	0	0
1997-12-29	9.44444	-1.11111		5.88889	9.44444	0	0
1997-12-30	10.5556	5		5	9.55556	0	0
1997-12-31	7.77778	-3.88889		-1.88889	6.77778	1	0
1998-01-01	11.1111	3.33333		7.33333	10.1111	0	0
1998-01-02	10.5556	-8.33333		-8.33333	8.55556	1	0
1998-01-03	-3.88889	-7.22222		2.77778	-3.88889	0	1
1998-01-04	2.22222	-5		4	5.22222	0	0
1998-01-05	3.33333	-5		1	3.33333	0	0
1998-01-06	4.44444	2.77778		8.77778	8.44444	0	0
1998-01-07	4.44444	0		5	8.44444	0	0
1998-01-08	3.88889	-5		2	6.88889	0	0
1998-01-09	-5	-11.6667		6.33333	3	0	0
1998-01-10	-7.77778	-16.1111		3.88889	2.22222	0	0
1998-01-11	-15.5556	-21.1111		5.88889	4.44444	0	0
1998-01-12	-15.5556	-21.6667		6.33333	6.44444	0	0
1998-01-13	-7.22222	-15.5556		8.44444	-0.222222	0	1
1998-01-14	0	-7.22222		0.777778	3	0	0
1998-01-15	5.55556	-0.555556		2.44444	6.55556	0	0
1998-01-16	2.77778	-1.66667		3.33333	4.77778	0	0
1998-01-17	6.11111	-0.555556		5.44444	9.11111	0	0
1998-01-18	5.55556	-2.22222		0.777778	6.55556	0	0
1998-01-19	1.66667	-2.22222		0.777778	0.666667	0	0
1998-01-20	2.77778	0.555556		3.55556	0.777778	0	0
1998-01-21	2.22222	-0.555556		3.44444	5.22222	0	0
1998-01-22	2.22222	-0.555556		4.44444	5.22222	0	0
1998-01-23	2.22222	-3.33333		2.66667	5.22222	0	0
1998-01-24	6.11111	-1.11111		4.88889	6.11111	0	0
1998-01-25	6.66667	2.77778		4.77778	6.66667	0	0
1998-01-26	8.33333	-0.555556		3.44444	8.33333	0	0
1998-01-27	3.88889	-0.555556		1.44444	2.88889	0	0
1998-01-28	3.88889	-2.22222		0.777778	2.88889	0	0
1998-01-29	0	-2.77778		1.22222	0	0	0
1998-01-30	6.66667	-1.66667		0.333333	4.66667	0	0
1998-01-31	6.66667	-2.22222		-0.222222	5.66667	1	0
1998-02-01	0	0		4	-1	0	1
1998-02-02	1.66667	-1.11111		5.88889	3.66667	0	0
1998-02-03	1.66667	-4.44444		1.55556	2.66667	0	0
1998-02-04	3.88889	-2.77778		1.22222	-0.111111	0	1
1998-02-05	7.22222	-2.22222		-3.22222	3.22222	1	0
1998-02-06	2.77778	-3.33333		-1.33333	-1.22222	1	1
1998-02-07	5	0.555556		3.55556	1	0	0
1998-02-08	7.77778	-1.66667		-0.666667	4.77778	1	0
1998-02-09	5.55556	1.66667		2.66667	4.55556	0	0
1998-02-10	5.55556	-2.22222		1.77778	6.55556	0	0
1998-02-11	5.55556	1.11111		7.11111	7.55556	0	0
1998-02-12	5.55556	-1.11111		2.88889	6.55556	0	0
1998-02-13	6.11111	1.66667		5.66667	6.11111	0	0
1998-02-14	5.55556	-2.77778		1.22222	6.55556	0	0
1998-02-15	6.11111	0.555556		6.55556	7.11111	0	0
1998-02-16	7.77778	0.555556		3.55556	8.77778	0	0
1998-02-17	3.88889	-3.88889		1.11111	2.88889	0	0
1998-02-18	8.33333	-1.11111		4.88889	6.33333	0	0
1998-02-19	8.33333	-3.33333		0.666667	6.33333	0	0
1998-02-20	9.44444	-2.22222		2.77778	7.44444	0	0
1998-02-21	7.77778	0		3	4.77778	0	0
1998-02-22	7.77778	0		3	7.77778	0	0
1998-02-23	5.55556	-1.66667		3.33333	6.55556	0	0
1998-02-24	5.55556	-3.33333		2.66667	5.55556	0	0
1998-02-25	3.33333	-2.77778		5.22222	5.33333	0	0
1998-02-26	2.22222	-1.66667		7.33333	4.22222	0	0
1998-02-27	2.77778	-1.66667		7.33333	6.77778	0	0
1998-02-28	4.44444	-5.55556		3.44444	6.44444	0	0
1998-03-01	3.88889	-1.11111		7.88889	2.88889	0	0
1998-03-02	6.11111	-1.11111		4.88889	6.11111	0	0
1998-03-03	4.44444	-1.11111		1.88889	-0.555556	0	1
1998-03-04	-0.555556	-3.33333		2.66667	0.444444	0	0
1998-03-05	-1.11111	-6.11111		5.88889	3.88889	0	0
1998-03-06	1.66667	-6.11111		5.88889	5.66667	0	0
1998-03-07	-0.555556	-9.44444		5.55556	5.44444	0	0
1998-03-08	0	-7.22222		7.77778	5	0	0
1998-03-09	3.88889	-1.66667		8.33333	4.88889	0	0
1998-03-10	5	-0.555556		5.44444	7	0	0
1998-03-11	8.88889	-0.555556		2.44444	5.88889	0	0
1998-03-12	5	-1.11111		0.888889	3	0	0
1998-03-13	10	-1.66667		-0.666667	2	1	0
1998-03-14	11.6667	0		-2	-0.333333	1	1
1998-03-15	9.44444	1.11111		1.11111	5.44444	0	0
1998-03-16	8.33333	3.88889		2.88889	2.33333	0	0
1998-03-17	5.55556	0		4	3.55556	0	0
1998-03-18	5	-2.77778		6.22222	5	0	0
1998-03-19	7.77778	-3.33333		5.66667	7.77778	0	0
1998-03-20	10.5556	-2.22222		5.77778	6.55556	0	0
1998-03-21	7.22222	2.22222		6.22222	-0.777778	0	1
1998-03-22	5.55556	3.33333		4.33333	1.55556	0	0
1998-03-23	9.44444	3.33333		1.33333	5.44444	0	0
1998-03-24	12.2222	2.77778		2.77778	7.22222	0	0
1998-03-25	12.2222	1.66667		1.66667	8.22222	0	0
1998-03-26	7.22222	4.44444		5.44444	1.22222	0	0
1998-03-27	6.66667	1.66667		4.66667	5.66667	0	0
1998-03-28	9.44444	-2.77778		5.22222	9.44444	0	0
1998-03-29	8.33333	-1.66667		8.33333	4.33333	0	0
1998-03-30	11.1111	-3.33333		2.66667	6.11111	0	0
1998-03-31	10.5556	-1.66667		4.33333	3.55556	0	0
1998-04-01	10.5556	0		3	1.55556	0	0
1998-04-02	16.1111	1.66667		1.66667	7.11111	0	0
1998-04-03	11.6667	1.66667		0.666667	-0.333333	0	1
1998-04-04	11.1111	2.77778		1.77778	3.11111	0	0
1998-04-05	8.88889	3.33333		3.33333	2.88889	0	0
1998-04-06	8.33333	2.22222		3.22222	4.33333	0	0
1998-04-07	8.88889	1.11111		2.11111	2.88889	0	0
1998-04-08	8.33333	1.11111		2.11111	5.33333	0	0
1998-04-09	11.1111	-1.66667		3.33333	7.11111	0	0
1998-04-10	12.2222	0.555556		6.55556	4.22222	0	0
1998-04-11	12.2222	0.555556		2.55556	7.22222	0	0
1998-04-12	6.66667	0.555556		3.55556	1.66667	0	0
1998-04-13	11.1111	0		5	9.11111	0	0
1998-04-14	11.6667	1.66667		5.66667	6.66667	0	0
1998-04-15	11.6667	2.22222		6.22222	11.6667	0	0
1998-04-16	10.5556	2.22222		4.22222	6.55556	0	0
1998-04-17	13.3333	2.77778		4.77778	9.33333	0	0
1998-04-18	13.3333	0.555556		3.55556	4.33333	0	0
1998-04-19	12.7778	5		8	4.77778	0	0
1998-04-20	15	0.555556		0.555556	9	0	0
1998-04-21	19.4444	1.66667		2.66667	8.44444	0	0
1998-04-22	20	4.44444		1.44444	5	0	0
1998-04-23	21.6667	10		4	4.66667	0	0
1998-04-24	19.4444	5		1	3.44444	0	0
1998-04-25	11.1111	5.55556		6.55556	7.11111	0	0
1998-04-26	14.4444	1.66667		3.66667	9.44444	0	0
1998-04-27	16.1111	2.77778		6.77778	8.11111	0	0
1998-04-28	17.7778	4.44444		4.44444	4.77778	0	0
1998-04-29	21.6667	5.55556		0.555556	5.66667	0	0
1998-04-30	22.2222	5.55556		-0.444444	7.22222	1	0
1998-05-01	23.8889	6.11111		0.111111	6.88889	0	0
1998-05-02	24.4444	6.11111		-1.88889	7.44444	1	0
1998-05-03	23.3333	10		2	5.33333	0	0
1998-05-04	22.2222	6.66667		-0.333333	6.22222	1	0
1998-05-05	22.2222	9.44444		4.44444	7.22222	0	0
1998-05-06	23.8889	8.33333		2.33333	5.88889	0	0
1998-05-07	22.7778	8.88889		2.88889	6.77778	0	0
1998-05-08	24.4444	8.33333		0.333333	6.44444	0	0
1998-05-09	22.7778	8.88889		1.88889	6.77778	0	0
1998-05-10	24.4444	10.5556		4.55556	8.44444	0	0
1998-05-11	22.2222	10.5556		5.55556	12.2222	0	0
1998-05-12	24.4444	6.66667		1.66667	10.4444	0	0
1998-05-13	20	11.1111		5.11111	5	0	0
1998-05-14	17.2222	6.66667		2.66667	4.22222	0	0
1998-05-15	12.7778	7.22222		7.22222	8.77778	0	0
1998-05-16	18.3333	1.66667		2.66667	11.3333	0	0
1998-05-17	14.4444	5.55556		7.55556	2.44444	0	0
1998-05-18	11.6667	7.77778		6.77778	4.66667	0	0
1998-05-19	16.6667	2.22222		2.22222	13.6667	0	0
1998-05-20	21.6667	3.33333		3.33333	7.66667	0	0
1998-05-21	17.2222	8.88889		2.88889	-0.777778	0	1
1998-05-22	9.44444	8.33333		3.33333	-3.55556	0	1
1998-05-23	14.4444	8.88889		5.88889	8.44444	0	0
1998-05-24	17.2222	7.77778		5.77778	10.2222	0	0
1998-05-25	22.7778	8.33333		5.33333	13.7778	0	0
1998-05-26	20.5556	10		4	2.55556	0	0
1998-05-27	24.4444	6.11111		1.11111	8.44444	0	0
1998-05-28	17.7778	5		5	10.7778	0	0
1998-05-29	15.5556	1.11111		0.111111	5.55556	0	0
1998-05-30	17.7778	3.33333		-0.666667	-0.222222	1	1
1998-05-31	16.6667	5		2	10.6667	0	0
1998-06-01	17.2222	6.66667		2.66667	10.2222	0	0
1998-06-02	17.2222	7.77778		7.77778	2.22222	0	0
1998-06-03	19.4444	7.22222		8.22222	11.4444	0	0
1998-06-04	18.8889	6.11111		4.11111	7.88889	0	0
1998-06-05	21.1111	8.33333		6.33333	9.11111	0	0
1998-06-06	21.6667	6.66667		2.66667	7.66667	0	0
1998-06-07	20	10		6	6	0	0
1998-06-08	18.8889	10		7	12.8889	0	0
1998-06-09	20	6.66667		2.66667	8	0	0
1998-06-10	20	12.2222		9.22222	4	0	0
1998-06-11	18.8889	12.7778		5.77778	8.88889	0	0
1998-06-12	20.5556	13.3333		6.33333	6.55556	0	0
1998-06-13	16.6667	10.5556		4.55556	1.66667	0	0
1998-06-14	16.6667	6.66667		2.66667	4.66667	0	0
1998-06-15	15.5556	2.22222		0.222222	5.55556	0	0
1998-06-16	14.4444	0.555556		-2.44444	6.44444	1	0
1998-06-17	20	7.77778		5.77778	14	0	0
1998-06-18	20	10.5556		6.55556	6	0	0
1998-06-19	17.7778	8.33333		3.33333	3.77778	0	0
1998-06-20	19.4444	9.44444		4.44444	8.44444	0	0
1998-06-21	23.3333	1.66667		-2.33333	12.3333	1	0
1998-06-22	21.6667	9.44444		7.44444	6.66667	0	0
1998-06-23	23.3333	10.5556		6.55556	6.33333	0	0
1998-06-24	20	9.44444		5.44444	6	0	0
1998-06-25	17.7778	7.77778		2.77778	7.77778	0	0
1998-06-26	17.2222	1.66667		-2.33333	5.22222	1	0
1998-06-27	16.6667	5.55556		1.55556	9.66667	0	0
1998-06-28	26.6667	10.5556		6.55556	18.6667	0	0
1998-06-29	24.4444	9.44444		4.44444	13.4444	0	0
1998-06-30	24.4444	11.6667		7.66667	6.44444	0	0
1998-07-01
1998-07-02
1998-07-03
1998-07-04
1998-07-05
1998-07-06
1998-07-07
1998-07-08
1998-07-09
1998-07-10
1998-07-11
1998-07-12
1998-07-13
1998-07-14
1998-07-15
1998-07-16
1998-07-17
1998-07-18
1998-07-19
1998-07-20
1998-07-21
1998-07-22
1998-07-23
1998-07-24
1998-07-25
1998-07-26
1998-07-27
1998-07-28
1998-07-29
1998-07-30
1998-07-31
1998-08-01
1998-08-02
1998-08-03	23.8889	15		4	5.88889	0	0
1998-08-04	30	15		4	9	0	0
1998-08-05	28.8889	15		2	3.88889	0	0
1998-08-06	33.3333	18.3333		3.33333	5.33333	0	0
1998-08-07	28.3333	16.1111		3.11111	3.33333	0	0
1998-08-08	28.8889	14.4444		3.44444	6.88889	0	0
1998-08-09	31.1111	12.7778		3.77778	10.1111	0	0
1998-08-10	32.2222	13.8889		1.88889	9.22222	0	0
1998-08-11	30.5556	15.5556		2.55556	6.55556	0	0
1998-08-12	31.1111	16.1111		3.11111	7.11111	0	0
1998-08-13	31.6667	15.5556		3.55556	7.66667	0	0
1998-08-14	31.6667	16.1111		3.11111	7.66667	0	0
1998-08-15	31.6667	18.3333		3.33333	6.66667	0	0
1998-08-16	25.5556	12.2222		0.222222	1.55556	0	0
1998-08-17	24.4444	12.7778		4.77778	5.44444	0	0
1998-08-18	23.8889	11.6667		6.66667	7.88889	0	0
1998-08-19	25	10.5556		6.55556	8	0	0
1998-08-20	29.4444	11.1111		6.11111	11.4444	0	0
1998-08-21	26.6667	15.5556		3.55556	2.66667	0	0
1998-08-22	28.3333	14.4444		3.44444	6.33333	0	0
1998-08-23	25.5556	12.2222		3.22222	5.55556	0	0
1998-08-24	22.2222	13.8889		5.88889	2.22222	0	0
1998-08-25	27.2222	13.3333		5.33333	13.2222	0	0
1998-08-26	25.5556	12.7778		5.77778	6.55556	0	0
1998-08-27	27.2222	12.7778		4.77778	8.22222	0	0
1998-08-28	27.2222	11.1111		4.11111	8.22222	0	0
1998-08-29	29.4444	12.2222		2.22222	6.44444	0	0
1998-08-30	29.4444	13.3333		-0.666667	2.44444	1	0
1998-08-31	30	13.3333		1.33333	6	0	0
1998-09-01	30.5556	13.3333		-0.666667	5.55556	1	0
1998-09-02	32.2222	15		1	7.22222	0	0
1998-09-03	33.3333	13.8889		-0.111111	7.33333	1	0
1998-09-04	31.6667	10.5556		-2.44444	6.66667	1	0
1998-09-05	32.2222	2.22222		-11.7778	6.22222	1	0
1998-09-06	26.1111	13.8889		-0.111111	0.111111	1	0
1998-09-07	26.6667	13.8889		-1.11111	0.666667	1	0
1998-09-08	25.5556	13.8889		0.888889	0.555556	0	0
1998-09-09	26.1111	15		3	9.11111	0	0
1998-09-10	23.3333	13.3333		3.33333	9.33333	0	0
1998-09-11	23.8889	11.6667		5.66667	7.88889	0	0
1998-09-12	25	11.1111		4.11111	8	0	0
1998-09-13	26.6667	11.6667		3.66667	7.66667	0	0
1998-09-14	27.2222	11.6667		3.66667	8.22222	0	0
1998-09-15	30	12.2222		4.22222	10	0	0
1998-09-16	25.5556	14.4444		3.44444	2.55556	0	0
1998-09-17	27.2222	12.7778		-0.222222	7.22222	1	0
1998-09-18	26.6667	11.6667		1.66667	3.66667	0	0
1998-09-19	22.2222	8.88889		4.88889	11.2222	0	0
1998-09-20	17.7778	7.22222		4.22222	10.7778	0	0
1998-09-21	19.4444	5.55556		3.55556	11.4444	0	0
1998-09-22	19.4444	6.11111		4.11111	7.44444	0	0
1998-09-23	22.2222	8.33333		2.33333	7.22222	0	0
1998-09-24	22.2222	11.6667		4.66667	7.22222	0	0
1998-09-25	13.3333	10.5556		5.55556	-1.66667	0	1
1998-09-26	17.2222	7.77778		3.77778	11.2222	0	0
1998-09-27	20.5556	6.66667		3.66667	10.5556	0	0
1998-09-28	22.7778	6.66667		2.66667	9.77778	0	0
1998-09-29	22.7778	7.77778		2.77778	8.77778	0	0
1998-09-30	20.5556	10		4	5.55556	0	0
1998-10-01	20	7.22222		2.22222	6	0	0
1998-10-02	13.8889	8.88889		1.88889	-2.11111	0	1
1998-10-03	15	3.33333		2.33333	5	0	0
1998-10-04	13.3333	3.33333		4.33333	11.3333	0	0
1998-10-05	12.2222	3.33333		5.33333	8.22222	0	0
1998-10-06	18.8889	6.66667		6.66667	15.8889	0	0
1998-10-07	17.7778	5		4	7.77778	0	0
1998-10-08	17.7778	8.33333		2.33333	3.77778	0	0
1998-10-09	14.4444	7.77778		4.77778	4.44444	0	0
1998-10-10	12.2222	3.33333		2.33333	5.22222	0	0
1998-10-11	12.7778	3.33333		3.33333	9.77778	0	0
1998-10-12	12.7778	2.77778		2.77778	7.77778	0	0
1998-10-13	12.7778	5		3	1.77778	0	0
1998-10-14	13.3333	7.77778		4.77778	3.33333	0	0
1998-10-15	12.7778	6.11111		5.11111	9.77778	0	0
1998-10-16	10	-0.555556		2.44444	9	0	0
1998-10-17	11.1111	0.555556		4.55556	10.1111	0	0
1998-10-18	13.3333	0.555556		2.55556	12.3333	0	0
1998-10-19	12.7778	2.22222		4.22222	9.77778	0	0
1998-10-20	12.7778	-0.555556		2.44444	8.77778	0	0
1998-10-21	13.3333	0.555556		2.55556	7.33333	0	0
1998-10-22	11.6667	1.66667		-1.33333	-1.33333	1	1
1998-10-23	12.2222	4.44444		1.44444	1.22222	0	0
1998-10-24	13.3333	1.66667		-1.33333	6.33333	1	0
1998-10-25	13.8889	1.11111		-0.888889	3.88889	1	0
1998-10-26	12.2222	6.66667		3.66667	3.22222	0	0
1998-10-27	12.2222	2.77778		0.777778	7.22222	0	0
1998-10-28	13.3333	4.44444		2.44444	3.33333	0	0
1998-10-29	9.44444	5.55556		6.55556	2.44444	0	0
1998-10-30	8.88889	-1.11111		3.88889	8.88889	0	0
1998-10-31	10	0		5	10	0	0
1998-11-01	10	0		2	7	0	0
1998-11-02	10	0		0	6	0	0
1998-11-03	10	1.66667		2.66667	8	0	0
1998-11-04	7.22222	0		2	4.22222	0	0
1998-11-05	5.55556	1.66667		4.66667	4.55556	0	0
1998-11-06	6.11111	2.22222		4.22222	4.11111	0	0
1998-11-07	7.77778	-3.33333		1.66667	8.77778	0	0
1998-11-08	3.33333	1.11111		6.11111	3.33333	0	0
1998-11-09	2.22222	1.11111		9.11111	6.22222	0	0
1998-11-10	3.88889	-1.66667		8.33333	7.88889	0	0
1998-11-11	2.22222	5.55556		12.5556	6.22222	0	0
1998-11-12	7.77778	3.33333		8.33333	10.7778	0	0
1998-11-13	9.44444	6.66667		10.6667	10.4444	0	0
1998-11-14	9.44444	6.11111		7.11111	8.44444	0	0
1998-11-15	10.5556	5.55556		4.55556	8.55556	0	0
1998-11-16	10	6.11111		5.11111	8	0	0
1998-11-17	6.11111	1.11111		5.11111	5.11111	0	0
1998-11-18	5.55556	1.11111		5.11111	5.55556	0	0
1998-11-19	7.22222	2.77778		4.77778	9.22222	0	0
1998-11-20	8.88889	2.22222		6.22222	9.88889	0	0
1998-11-21	8.88889	5		8	8.88889	0	0
1998-11-22	7.77778	3.88889		6.88889	6.77778	0	0
1998-11-23	7.77778	1.11111		5.11111	9.77778	0	0
1998-11-24	7.22222	2.22222		7.22222	7.22222	0	0
1998-11-25	8.88889	2.77778		6.77778	9.88889	0	0
1998-11-26	12.2222	6.11111		10.1111	11.2222	0	0
1998-11-27	8.33333	2.77778		3.77778	6.33333	0	0
1998-11-28	4.44444	2.77778		4.77778	2.44444	0	0
1998-11-29	5	-1.11111		1.88889	5	0	0
1998-11-30	4.44444	-1.11111		2.88889	6.44444	0	0
1998-12-01	6.66667	1.11111		6.11111	5.66667	0	0
1998-12-02	8.33333	2.22222		7.22222	7.33333	0	0
1998-12-03	5.55556	0.555556		3.55556	5.55556	0	0
1998-12-04	1.66667	-2.77778		3.22222	4.66667	0	0
1998-12-05	1.11111	-2.22222		6.77778	7.11111	0	0
1998-12-06	1.11111	-2.77778		5.22222	8.11111	0	0
1998-12-07	3.33333	-2.77778		5.22222	9.33333	0	0
1998-12-08	3.88889	1.66667		8.66667	7.88889	0	0
1998-12-09	2.77778	0.555556		6.55556	6.77778	0	0
1998-12-10	4.44444	-2.22222		4.77778	8.44444	0	0
1998-12-11	7.22222	2.22222		10.2222	10.2222	0	0
1998-12-12	8.88889	4.44444		7.44444	9.88889	0	0
1998-12-13	11.1111	2.77778		3.77778	10.1111	0	0
1998-12-14	10.5556	3.33333		2.33333	8.55556	0	0
1998-12-15	5	0.555556		7.55556	3	0	0
1998-12-16	6.66667	2.22222		9.22222	10.6667	0	0
1998-12-17	9.44444	1.66667		5.66667	8.44444	0	0
1998-12-18	6.11111	-12.2222		-2.22222	5.11111	1	0
1998-12-19	-12.2222	-18.3333		5.66667	-2.22222	0	1
1998-12-20	-14.4444	-20.5556		7.44444	9.55556	0	0
1998-12-21	-13.3333	-20.5556		8.44444	12.6667	0	0
1998-12-22	-11.6667	-16.6667		10.3333	9.33333	0	0
1998-12-23	-9.44444	-14.4444		8.55556	8.55556	0	0
1998-12-24	-5.55556	-13.3333		8.66667	10.4444	0	0
1998-12-25	0.555556	-6.66667		9.33333	7.55556	0	0
1998-12-26	4.44444	-1.66667		5.33333	7.44444	0	0
1998-12-27	6.66667	-1.11111		3.88889	8.66667	0	0
1998-12-28	7.77778	1.11111		6.11111	9.77778	0	0
1998-12-29	7.22222	2.77778		4.77778	7.22222	0	0
1998-12-30	8.33333	3.33333		4.33333	7.33333	0	0
1998-12-31	3.33333	-1.11111		2.88889	2.33333	0	0
1999-01-01	5.55556	0		4	4.55556	0	0
1999-01-02	2.22222	-2.22222		5.77778	4.22222	0	0
1999-01-03	-2.22222	-6.66667		3.33333	1.77778	0	0
1999-01-04	1.66667	-2.77778		6.22222	7.66667	0	0
1999-01-05	6.66667	0.555556		6.55556	8.66667	0	0
1999-01-06	6.11111	0.555556		3.55556	8.11111	0	0
1999-01-07	3.33333	0.555556		2.55556	3.33333	0	0
1999-01-08	3.33333	1.11111		5.11111	5.33333	0	0
1999-01-09	5.55556	1.66667		7.66667	8.55556	0	0
1999-01-10	6.66667	1.66667		4.66667	9.66667	0	0
1999-01-11	9.44444	6.11111		9.11111	7.44444	0	0
1999-01-12	8.88889	2.22222		4.22222	6.88889	0	0
1999-01-13	6.66667	0.555556		3.55556	8.66667	0	0
1999-01-14	8.88889	1.11111		7.11111	10.8889	0	0
1999-01-15	8.88889	3.33333		6.33333	7.88889	0	0
1999-01-16	5.55556	-0.555556		5.44444	6.55556	0	0
1999-01-17	3.88889	0.555556		6.55556	7.88889	0	0
1999-01-18	6.66667	0		5	9.66667	0	0
1999-01-19	6.66667	3.88889		6.88889	7.66667	0	0
1999-01-20	6.66667	6.66667		8.66667	7.66667	0	0
1999-01-21	1.66667	0		5	1.66667	0	0
1999-01-22	5	1.11111		7.11111	7	0	0
1999-01-23	3.33333	-5		2	5.33333	0	0
1999-01-24	-6.66667	-11.1111		7.88889	1.33333	0	0
1999-01-25	-1.11111	-7.77778		11.2222	9.88889	0	0
1999-01-26	-2.22222	-7.22222		4.77778	2.77778	0	0
1999-01-27	0	-5		7	7	0	0
1999-01-28	4.44444	-1.11111		7.88889	11.4444	0	0
1999-01-29	9.44444	4.44444		11.4444	12.4444	0	0
1999-01-30	7.22222	-1.11111		1.88889	7.22222	0	0
1999-01-31	6.11111	-3.33333		0.666667	5.11111	0	0
1999-02-01	6.11111	-3.33333		3.66667	6.11111	0	0
1999-02-02	5	0.555556		8.55556	11	0	0
1999-02-03	6.11111	2.22222		8.22222	9.11111	0	0
1999-02-04	5.55556	-0.555556		5.44444	8.55556	0	0
1999-02-05	6.66667	1.66667		5.66667	9.66667	0	0
1999-02-06	7.77778	2.22222		7.22222	8.77778	0	0
1999-02-07	6.66667	0.555556		4.55556	7.66667	0	0
1999-02-08	4.44444	0		6	5.44444	0	0
1999-02-09	4.44444	-1.66667		5.33333	9.44444	0	0
1999-02-10	-0.555556	-3.33333		4.66667	3.44444	0	0
1999-02-11	0.555556	-6.11111		3.88889	7.55556	0	0
1999-02-12	1.11111	-8.88889		1.11111	6.11111	0	0
1999-02-13	1.66667	-5		5	3.66667	0	0
1999-02-14	2.77778	-1.66667		1.33333	0.777778	0	0
1999-02-15	5	-0.555556		4.44444	5	0	0
1999-02-16	6.11111	-2.22222		5.77778	8.11111	0	0
1999-02-17	7.22222	0		7	9.22222	0	0
1999-02-18	4.44444	-1.11111		3.88889	6.44444	0	0
1999-02-19	3.88889	-0.555556		4.44444	4.88889	0	0
1999-02-20	5.55556	-2.77778		2.22222	7.55556	0	0
1999-02-21	2.77778	-1.11111		6.88889	2.77778	0	0
1999-02-22	6.11111	0		5	8.11111	0	0
1999-02-23	6.11111	1.66667		6.66667	8.11111	0	0
1999-02-24	8.88889	2.22222		8.22222	9.88889	0	0
1999-02-25	8.88889	2.22222		3.22222	7.88889	0	0
1999-02-26	5.55556	1.66667		4.66667	2.55556	0	0
1999-02-27	3.88889	-3.33333		5.66667	5.88889	0	0
1999-02-28	8.88889	0		9	8.88889	0	0
1999-03-01	8.33333	3.33333		6.33333	6.33333	0	0
1999-03-02	8.33333	0.555556		5.55556	8.33333	0	0
1999-03-03	6.11111	0		5	3.11111	0	0
1999-03-04	4.44444	0		6	4.44444	0	0
1999-03-05	2.77778	-1.66667		5.33333	4.77778	0	0
1999-03-06	5	-5.55556		1.44444	9	0	0
1999-03-07	6.11111	-3.88889		6.11111	6.11111	0	0
1999-03-08	6.11111	-3.33333		4.66667	3.11111	0	0
1999-03-09	9.44444	0		9	7.44444	0	0
1999-03-10	8.33333	-1.66667		2.33333	4.33333	0	0
1999-03-11	7.22222	-2.77778		4.22222	4.22222	0	0
1999-03-12	5.55556	-2.22222		4.77778	2.55556	0	0
1999-03-13	14.4444	-0.555556		6.44444	12.4444	0	0
1999-03-14	15	1.66667		4.66667	10	0	0
1999-03-15	13.8889	5.55556		4.55556	6.88889	0	0
1999-03-16	12.2222	1.66667		1.66667	8.22222	0	0
1999-03-17	10.5556	-2.77778		3.22222	10.5556	0	0
1999-03-18	10	-1.66667		7.33333	7	0	0
1999-03-19	12.2222	-1.11111		0.888889	1.22222	0	0
1999-03-20	10.5556	0		-1	-1.44444	1	1
1999-03-21	17.2222	2.22222		-1.77778	3.22222	1	0
1999-03-22	13.8889	2.22222		0.222222	-0.111111	0	1
1999-03-23	16.6667	0		0	11.6667	0	0
1999-03-24	14.4444	0		0	3.44444	0	0
1999-03-25	17.7778	1.66667		-1.33333	5.77778	1	0
1999-03-26	14.4444	3.33333		2.33333	2.44444	0	0
1999-03-27	6.11111	0		5	5.11111	0	0
1999-03-28	5.55556	0		7	7.55556	0	0
1999-03-29	7.77778	0.555556		7.55556	8.77778	0	0
1999-03-30	6.66667	0		6	7.66667	0	0
1999-03-31	8.33333	-2.22222		2.77778	6.33333	0	0
1999-04-01	9.44444	-2.22222		5.77778	8.44444	0	0
1999-04-02	9.44444	-3.88889		5.11111	9.44444	0	0
1999-04-03	10	-2.77778		6.22222	5	0	0
1999-04-04	7.22222	0.555556		7.55556	0.222222	0	0
1999-04-05	7.77778	-1.66667		3.33333	9.77778	0	0
1999-04-06	9.44444	-1.11111		3.88889	5.44444	0	0
1999-04-07	13.3333	-1.11111		2.88889	7.33333	0	0
1999-04-08	13.8889	1.66667		7.66667	3.88889	0	0
1999-04-09	8.88889	1.11111		4.11111	3.88889	0	0
1999-04-10	10	-0.555556		5.44444	11	0	0
1999-04-11	13.3333	-3.33333		2.66667	8.33333	0	0
1999-04-12	13.8889	-3.33333		2.66667	4.88889	0	0
1999-04-13	12.7778	6.11111		8.11111	5.77778	0	0
1999-04-14	11.1111	-1.11111		2.88889	7.11111	0	0
1999-04-15	10	-2.77778		3.22222	6	0	0
1999-04-16	13.3333	-1.66667		3.33333	4.33333	0	0
1999-04-17	20.5556	0.555556		2.55556	8.55556	0	0
1999-04-18	22.7778	4.44444		2.44444	7.77778	0	0
1999-04-19	21.6667	8.88889		4.88889	6.66667	0	0
1999-04-20	12.2222	5		3	8.22222	0	0
1999-04-21	10	1.11111		3.11111	4	0	0
1999-04-22	12.7778	1.66667		4.66667	9.77778	0	0
1999-04-23	18.8889	2.22222		4.22222	12.8889	0	0
1999-04-24	17.7778	1.66667		1.66667	5.77778	0	0
1999-04-25	22.2222	2.77778		0.777778	8.22222	0	0
1999-04-26	15.5556	7.22222		3.22222	0.555556	0	0
1999-04-27	15.5556	5		5	5.55556	0	0
1999-04-28	10	2.77778		3.77778	3	0	0
1999-04-29	9.44444	5		7	7.44444	0	0
1999-04-30	14.4444	1.66667		3.66667	12.4444	0	0
1999-05-01	13.8889	0.555556		1.55556	3.88889	0	0
1999-05-02	11.1111	2.22222		4.22222	5.11111	0	0
1999-05-03	14.4444	5		7	10.4444	0	0
1999-05-04	10.5556	2.22222		3.22222	1.55556	0	0
1999-05-05	11.1111	2.77778		6.77778	7.11111	0	0
1999-05-06	14.4444	0.555556		4.55556	8.44444	0	0
1999-05-07	14.4444	4.44444		7.44444	2.44444	0	0
1999-05-08	10.5556	-1.66667		2.33333	2.55556	0	0
1999-05-09	5	-0.555556		4.44444	0	0	0
1999-05-10	8.88889	1.66667		5.66667	7.88889	0	0
1999-05-11	12.7778	1.11111		4.11111	5.77778	0	0
1999-05-12	13.3333	5.55556		7.55556	4.33333	0	0
1999-05-13	11.6667	3.33333		4.33333	4.66667	0	0
1999-05-14	13.3333	5		6	5.33333	0	0
1999-05-15	12.7778	4.44444		5.44444	5.77778	0	0
1999-05-16	17.7778	3.33333		3.33333	12.7778	0	0
1999-05-17	17.2222	6.66667		5.66667	8.22222	0	0
1999-05-18	16.6667	7.77778		6.77778	9.66667	0	0
1999-05-19	17.2222	9.44444		6.44444	7.22222	0	0
1999-05-20	18.8889	5		3	9.88889	0	0
1999-05-21	18.8889	7.22222		4.22222	4.88889	0	0
1999-05-22	21.1111	6.11111		3.11111	9.11111	0	0
1999-05-23	24.4444	6.11111		4.11111	10.4444	0	0
1999-05-24	26.6667	9.44444		3.44444	8.66667	0	0
1999-05-25	25.5556	11.1111		0.111111	4.55556	0	0
1999-05-26	24.4444	10		4	6.44444	0	0
1999-05-27	23.8889	6.66667		2.66667	9.88889	0	0
1999-05-28	26.6667	11.6667		6.66667	9.66667	0	0
1999-05-29	24.4444	11.1111		5.11111	7.44444	0	0
1999-05-30	17.7778	8.88889		6.88889	6.77778	0	0
1999-05-31	13.3333	8.33333		6.33333	6.33333	0	0
1999-06-01	20	8.33333		6.33333	14	0	0
1999-06-02	20	10.5556		7.55556	9	0	0
1999-06-03	17.2222	10		5	7.22222	0	0
1999-06-04	17.7778	8.88889		4.88889	11.7778	0	0
1999-06-05	18.3333	11.6667		7.66667	10.3333	0	0
1999-06-06	15	9.44444		6.44444	8	0	0
1999-06-07	17.2222	3.88889		4.88889	9.22222	0	0
1999-06-08	16.1111	6.11111		8.11111	6.11111	0	0
1999-06-09	13.3333	5.55556		5.55556	8.33333	0	0
1999-06-10	18.8889	3.33333		3.33333	13.8889	0	0
1999-06-11	17.7778	5.55556		5.55556	4.77778	0	0
1999-06-12	24.4444	6.11111		5.11111	11.4444	0	0
1999-06-13	22.2222	8.33333		4.33333	5.22222	0	0
1999-06-14	28.3333	11.1111		2.11111	9.33333	0	0
1999-06-15	28.8889	15		6	9.88889	0	0
1999-06-16	31.1111	14.4444		4.44444	12.1111	0	0
1999-06-17	27.7778	12.7778		4.77778	6.77778	0	0
1999-06-18	24.4444	12.7778		4.77778	6.44444	0	0
1999-06-19	25.5556	11.1111		4.11111	7.55556	0	0
1999-06-20	26.1111	9.44444		3.44444	10.1111	0	0
1999-06-21	24.4444	13.8889		7.88889	6.44444	0	0
1999-06-22	19.4444	13.3333		7.33333	10.4444	0	0
1999-06-23	22.2222	15		10	15.2222	0	0
1999-06-24	24.4444	8.88889		2.88889	11.4444	0	0
1999-06-25	22.7778	9.44444		4.44444	4.77778	0	0
1999-06-26	19.4444	10		8	13.4444	0	0
1999-06-27	16.6667	6.66667		3.66667	8.66667	0	0
1999-06-28	17.2222	8.33333		6.33333	8.22222	0	0
1999-06-29	20	12.2222		9.22222	6	0	0
1999-06-30	19.4444	12.2222		7.22222	7.44444	0	0
1999-07-01	15.5556	11.6667		7.66667	7.55556	0	0
1999-07-02	15	11.1111		9.11111	6	0	0
1999-07-03	15	0		0	8	0	0
1999-07-04	16.1111	0.555556		1.55556	5.11111	0	0
1999-07-05	17.7778	-1.11111		-2.11111	8.77778	1	0
1999-07-06	25	7.77778		5.77778	10	0	0
1999-07-07	24.4444	13.3333		7.33333	1.44444	0	0
1999-07-08	21.1111	-8.33333		-13.3333	1.11111	1	0
1999-07-09	18.3333	3.33333		0.333333	4.33333	0	0
1999-07-10	25	-2.22222		-6.22222	5	1	0
1999-07-11	31.6667	4.44444		-4.55556	7.66667	1	0
1999-07-12	30	10.5556		1.55556	6	0	0
1999-07-13	31.1111	14.4444		4.44444	6.11111	0	0
1999-07-14	30	6.11111		-3.88889	5	1	0
1999-07-15	25.5556	9.44444		4.44444	4.55556	0	0
1999-07-16	20	9.44444		7.44444	14	0	0
1999-07-17	24.4444	6.66667		5.66667	12.4444	0	0
1999-07-18	22.7778	11.1111		5.11111	2.77778	0	0
1999-07-19	26.6667	8.88889		3.88889	13.6667	0	0
1999-07-20	28.8889	11.6667		5.66667	9.88889	0	0
1999-07-21	26.1111	13.8889		3.88889	4.11111	0	0
[truncated: 894 more rows]

## Sheet: SNOTEL Air temp
SNOTEL air temperature data from the Noisy Basin site
	Tmin	Tmx
	deg C	deg C
1990-01-01	-5	-1
1990-01-02	-6	-4
1990-01-03	-12	-6
1990-01-04	-12	-8
1990-01-05	-8	-4
1990-01-06	-6	-2
1990-01-07	-3	-1
1990-01-08	-3	-1
1990-01-09	-4	-2
1990-01-10	-4	0
1990-01-11	-11	0
1990-01-12	-12	-6
1990-01-13	-8	1
1990-01-14	-2	0
1990-01-15	-3	0
1990-01-16	-6	-3
1990-01-17	-9	-3
1990-01-18	-12	-5
1990-01-19	-10	-5
1990-01-20	-10	-7
1990-01-21	-11	-7
1990-01-22	-7	-3
1990-01-23	-6	-3
1990-01-24	-8	-6
1990-01-25	-10	-8
1990-01-26	-8	-4
1990-01-27	-12	-5
1990-01-28	-12	-7
1990-01-29	-8	-5
1990-01-30	-10	-4
1990-01-31	-9	-6
1990-02-01	-12	-7
1990-02-02	-10	-6
1990-02-03	-8	-5
1990-02-04	-7	-2
1990-02-05	-11	-4
1990-02-06	-12	-6
1990-02-07	-11	-4
1990-02-08	-12	-10
1990-02-09	-12	-7
1990-02-10	-9	-3
1990-02-11	-3	0
1990-02-12	-9	1
1990-02-13	-21	-9
1990-02-14	-25	-22
1990-02-15	-25	-15
1990-02-16	-21	-10
1990-02-17	-13	-9
1990-02-18	-16	-9
1990-02-19	-14	-7
1990-02-20	-14	-6
1990-02-21	-9	-4
1990-02-22	-4	-3
1990-02-23	-4	2
1990-02-24	-4	3
1990-02-25	-3	-1
1990-02-26	-5	1
1990-02-27	-8	-1
1990-02-28	-9	-1
1990-03-01	-8	0
1990-03-02	-7	2
1990-03-03	-8	3
1990-03-04	-5	4
1990-03-05	-6	1
1990-03-06	-7	1
1990-03-07	-6	2
1990-03-08	-5	6
1990-03-09	-9	-1
1990-03-10	-8	0
1990-03-11	-6	1
1990-03-12	-7	-4
1990-03-13	-10	-4
1990-03-14	-7	-3
1990-03-15	-8	-4
1990-03-16	-6	0
1990-03-17	-6	3
1990-03-18	-6	2
1990-03-19	-6	7
1990-03-20	-1	4
1990-03-21	-1	1
1990-03-22	-8	3
1990-03-23	-17	-9
1990-03-24	-18	-9
1990-03-25	-18	-2
1990-03-26	-13	5
1990-03-27	-6	6
1990-03-28	-4	7
1990-03-29	-4	7
1990-03-30	-4	8
1990-03-31	-2	10
1990-04-01	-1	11
1990-04-02	1	12
1990-04-03	1	12
1990-04-04	0	12
1990-04-05	-5	6
1990-04-06	-6	6
1990-04-07	-2	9
1990-04-08	0	11
1990-04-09	-4	12
1990-04-10	-11	-2
1990-04-11	-10	0
1990-04-12	-5	7
1990-04-13	-1	6
1990-04-14	-1	6
1990-04-15	0	5
1990-04-16	0	8
1990-04-17	-4	8
1990-04-18	0	12
1990-04-19	2	10
1990-04-20	0	12
1990-04-21	3	13
1990-04-22	3	8
1990-04-23	2	10
1990-04-24	0	6
1990-04-25	-1	6
1990-04-26	-2	2
1990-04-27	-4	1
1990-04-28	-4	1
1990-04-29	-10	0
1990-04-30	-12	1
1990-05-01	-6	11
1990-05-02	-4	9
1990-05-03	0	6
1990-05-04	1	11
1990-05-05	3	16
1990-05-06	5	18
1990-05-07	-3	9
1990-05-08	-5	6
1990-05-09	-4	4
1990-05-10	-4	9
1990-05-11	-1	13
1990-05-12	-1	13
1990-05-13	0	5
1990-05-14	-1	5
1990-05-15	-2	5
1990-05-16	-1	5
1990-05-17	-1	7
1990-05-18	-1	12
1990-05-19	0	3
1990-05-20	-1	10
1990-05-21	0	9
1990-05-22	-1	7
1990-05-23	3	15
1990-05-24	3	14
1990-05-25	0	8
1990-05-26	-1	1
1990-05-27	0	12
1990-05-28	0	16
1990-05-29	6	10
1990-05-30	4	12
1990-05-31	2	11
1990-06-01	-1	10
1990-06-02	-2	0
1990-06-03	-1	1
1990-06-04	0	11
1990-06-05	0	8
1990-06-06	0	13
1990-06-07	1	12
1990-06-08	0	6
1990-06-09	-1	9
1990-06-10	4	18
1990-06-11	0	15
1990-06-12	-1	0
1990-06-13	-1	0
1990-06-14	0	9
1990-06-15	1	10
1990-06-16	2	14
1990-06-17	3	14
1990-06-18	3	14
1990-06-19	4	16
1990-06-20	5	15
1990-06-21	5	16
1990-06-22	4	18
1990-06-23	10	24
1990-06-24	9	22
1990-06-25	9	25
1990-06-26	10	24
1990-06-27	10	24
1990-06-28	8	20
1990-06-29	4	15
1990-06-30	5	23
1990-07-01	11	27
1990-07-02	10	26
1990-07-03	4	16
1990-07-04	3	11
1990-07-05	4	18
1990-07-06	8	25
1990-07-07	4	11
1990-07-08	4	13
1990-07-09	7	21
1990-07-10	9	22
1990-07-11	10	24
1990-07-12	13	27
1990-07-13	14	26
1990-07-14	12	26
1990-07-15	11	23
1990-07-16	11	24
1990-07-17	11	25
1990-07-18	8	23
1990-07-19	8	23
1990-07-20	8	20
1990-07-21	7	16
1990-07-22	6	18
1990-07-23	8	22
1990-07-24	11	22
1990-07-25	8	19
1990-07-26	7	10
1990-07-27	6	8
1990-07-28	8	16
1990-07-29	8	20
1990-07-30	11	22
1990-07-31	12	25
1990-08-01	11	20
1990-08-02	9	20
1990-08-03	8	20
1990-08-04	8	20
1990-08-05	10	23
1990-08-06	13	25
1990-08-07	14	27
1990-08-08	16	22
1990-08-09	12	25
1990-08-10	14	25
1990-08-11	15	24
1990-08-12	12	20
1990-08-13	11	23
1990-08-14	12	23
1990-08-15	14	26
1990-08-16	12	27
1990-08-17	10	22
1990-08-18	8	19
1990-08-19	7	17
1990-08-20	8	16
1990-08-21	8	20
1990-08-22	5	15
1990-08-23	7	9
1990-08-24	5	14
1990-08-25	5	11
1990-08-26	5	9
1990-08-27	4	11
1990-08-28	3	13
1990-08-29	5	18
1990-08-30	7	20
1990-08-31	6	13
1990-09-01	5	14
1990-09-02	4	17
1990-09-03	9	20
1990-09-04	8	19
1990-09-05	11	21
1990-09-06	12	21
1990-09-07	10	22
1990-09-08	10	22
1990-09-09	9	20
1990-09-10	9	20
1990-09-11	8	20
1990-09-12	9	22
1990-09-13	6	18
1990-09-14	5	14
1990-09-15	7	20
1990-09-16	8	21
1990-09-17	3	10
1990-09-18	4	12
1990-09-19	4	14
1990-09-20	5	14
1990-09-21	4	13
1990-09-22	4	14
1990-09-23	6	18
1990-09-24	8	18
1990-09-25	8	18
1990-09-26	8	18
1990-09-27	7	16
1990-09-28	6	16
1990-09-29	4	14
1990-09-30	6	14
1990-10-01	5	14
1990-10-02	3	14
1990-10-03	-2	3
1990-10-04	-3	4
1990-10-05	4	8
1990-10-06	-2	7
1990-10-07	-6	-1
1990-10-08	-5	-1
1990-10-09	-3	2
1990-10-10	-2	7
1990-10-11	-5	2
1990-10-12	-6	0
1990-10-13	-2	2
1990-10-14	-4	-1
1990-10-15	-6	-2
1990-10-16	-3	0
1990-10-17	-4	0
1990-10-18	-5	0
1990-10-19	-2	1
1990-10-20	-5	-2
1990-10-21	-5	-2
1990-10-22	-5	0
1990-10-23	-5	0
1990-10-24	-5	2
1990-10-25	-4	2
1990-10-26	2	9
1990-10-27	-2	4
1990-10-28	-2	7
1990-10-29	-2	6
1990-10-30	-1	3
1990-10-31	1	4
1990-11-01	-2	2
1990-11-02	-6	-2
1990-11-03	-10	-3
1990-11-04	-10	-4
1990-11-05	-4	-1
1990-11-06	-11	-3
1990-11-07	-12	-6
1990-11-08	-8	-4
1990-11-09	-4	-2
1990-11-10	-3	1
1990-11-11	1	2
1990-11-12	0	6
1990-11-13	1	8
1990-11-14	0	7
1990-11-15	-6	0
1990-11-16	-6	-2
1990-11-17	-7	-2
1990-11-18	-5	-1
1990-11-19	-6	-1
1990-11-20	-5	-1
1990-11-21	-10	-4
1990-11-22	-10	-5
1990-11-23	-5	-1
1990-11-24	-2	0
1990-11-25	-1	0
1990-11-26	-6	0
1990-11-27	-11	-6
1990-11-28	-10	-8
1990-11-29	-11	-7
1990-11-30	-7	-3
1990-12-01	-11	-6
1990-12-02	-10	-8
1990-12-03	-13	-8
1990-12-04	-10	-4
1990-12-05	-6	-2
1990-12-06	-8	-6
1990-12-07	-8	-5
1990-12-08	-8	-4
1990-12-09	-7	0
1990-12-10	-1	0
1990-12-11	-2	0
1990-12-12	-8	-2
1990-12-13	-11	-6
1990-12-14	-11	-8
1990-12-15	-11	-9
1990-12-16	-13	-9
1990-12-17	-10	-8
1990-12-18	-10	-4
1990-12-19	-31	-4
1990-12-20	-31	-30
1990-12-21	-31	-29
1990-12-22	-32	-29
1990-12-23	-31	-24
1990-12-24	-27	-19
1990-12-25	-19	-14
1990-12-26	-18	-13
1990-12-27	-18	-9
1990-12-28	-28	-6
1990-12-29	-33	-28
1990-12-30	-34	-27
1990-12-31	-27	-14
1991-01-01	-14	-7
1991-01-02	-14	-6
1991-01-03	-15	-8
1991-01-04	-17	-12
1991-01-05	-19	-12
1991-01-06	-18	-13
1991-01-07	-17	-7
1991-01-08	-7	-6
1991-01-09	-8	-6
1991-01-10	-6	-2
1991-01-11	-6	-4
1991-01-12	-4	-1
1991-01-13	-2	0
1991-01-14	-3	-2
1991-01-15	-3	-3
1991-01-16	-4	-1
1991-01-17	-5	-4
1991-01-18	-4	-1
1991-01-19	-11	-1
1991-01-20	-14	-7
1991-01-21	-14	-6
1991-01-22	-13	-7
1991-01-23	-11	-6
1991-01-24	-14	-8
1991-01-25	-15	-6
1991-01-26	-17	-8
1991-01-27	-15	-11
1991-01-28	-13	-10
1991-01-29	-23	-12
1991-01-30	-22	-14
1991-01-31	-16	-5
1991-02-01	-8	-2
1991-02-02	-2	2
1991-02-03	-2	2
1991-02-04	-2	0
1991-02-05	-1	3
1991-02-06	-4	2
1991-02-07	-7	-1
1991-02-08	-5	2
1991-02-09	-2	4
1991-02-10	-1	4
1991-02-11	-3	1
1991-02-12	-4	3
1991-02-13	-3	-1
1991-02-14	-4	0
1991-02-15	-4	1
1991-02-16	0	1
1991-02-17	-4	0
1991-02-18	-6	-2
1991-02-19	-7	-4
1991-02-20	-6	0
1991-02-21	-3	0
1991-02-22	-6	1
1991-02-23	-8	2
1991-02-24	-10	-2
1991-02-25	-12	-1
1991-02-26	-8	1
1991-02-27	-6	2
1991-02-28	-4	-1
1991-03-01	-22	-3
1991-03-02	-23	-13
1991-03-03	-14	-3
1991-03-04	-4	-1
1991-03-05	-4	0
1991-03-06	-11	-4
1991-03-07	-11	-6
1991-03-08	-9	-7
1991-03-09	-9	-1
1991-03-10	-9	2
1991-03-11	-10	0
1991-03-12	-12	2
1991-03-13	-11	-3
1991-03-14	-9	1
1991-03-15	-8	1
1991-03-16	-7	0
1991-03-17	-8	0
1991-03-18	-9	4
1991-03-19	-8	6
1991-03-20	-3	10
1991-03-21	-3	0
1991-03-22	-6	3
1991-03-23	-7	0
1991-03-24	-9	3
1991-03-25	-5	4
1991-03-26	-15	-4
1991-03-27	-16	-7
1991-03-28	-11	-5
1991-03-29	-7	-4
1991-03-30	-10	0
1991-03-31	-5	4
1991-04-01	-3	12
1991-04-02	1	14
1991-04-03	-5	1
1991-04-04	-6	5
1991-04-05	0	2
1991-04-06	-2	2
1991-04-07	-5	3
1991-04-08	-7	3
1991-04-09	-8	1
1991-04-10	-8	-1
1991-04-11	-8	1
1991-04-12	-6	1
1991-04-13	-4	6
1991-04-14	-6	10
1991-04-15	-3	5
1991-04-16	-4	4
1991-04-17	-4	2
1991-04-18	-4	2
1991-04-19	-3	8
1991-04-20	-3	12
1991-04-21	0	12
1991-04-22	1	15
1991-04-23	2	13
1991-04-24	1	13
1991-04-25	-6	8
1991-04-26	-6	5
1991-04-27	-5	2
1991-04-28	-4	-1
1991-04-29	-5	8
1991-04-30	-4	7
1991-05-01	-5	10
1991-05-02	-2	6
1991-05-03	-5	2
1991-05-04	-5	4
1991-05-05	-5	6
1991-05-06	-1	11
1991-05-07	0	8
1991-05-08	0	6
1991-05-09	-2	3
1991-05-10	-3	1
1991-05-11	-3	10
1991-05-12	2	11
1991-05-13	0	3
1991-05-14	0	9
1991-05-15	1	9
1991-05-16	0	11
1991-05-17	3	13
1991-05-18	6	13
1991-05-19	3	11
1991-05-20	1	12
1991-05-21	4	14
1991-05-22	3	7
1991-05-23	2	14
1991-05-24	1	12
1991-05-25	0	14
1991-05-26	-1	5
1991-05-27	-2	8
1991-05-28	-1	10
1991-05-29	1	11
1991-05-30	0	13
1991-05-31	2	6
1991-06-01	2	8
1991-06-02	2	15
1991-06-03	6	18
1991-06-04	1	14
1991-06-05	-2	11
1991-06-06	4	6
1991-06-07	4	13
1991-06-08	3	4
1991-06-09	3	4
1991-06-10	2	13
1991-06-11	5	19
1991-06-12	0	10
1991-06-13	0	9
1991-06-14	-1	8
1991-06-15	-1	5
1991-06-16	-2	13
1991-06-17	-1	4
1991-06-18	-1	4
1991-06-19	0	15
1991-06-20	6	10
1991-06-21	3	11
1991-06-22	2	16
1991-06-23	3	11
1991-06-24	3	16
1991-06-25	4	11
1991-06-26	4	6
1991-06-27	4	12
1991-06-28	4	16
1991-06-29	6	12
1991-06-30	5	17
1991-07-01	5	7
1991-07-02	4	16
1991-07-03	7	20
1991-07-04	10	24
1991-07-05	10	26
1991-07-06	8	23
1991-07-07	5	18
1991-07-08	4	18
1991-07-09	7	21
1991-07-10	8	23
1991-07-11	7	13
1991-07-12	6	20
1991-07-13	9	24
1991-07-14	13	26
1991-07-15	9	16
1991-07-16	8	24
1991-07-17	8	24
1991-07-18	5	10
1991-07-19	6	16
1991-07-20	4	18
1991-07-21	6	21
1991-07-22	8	21
1991-07-23	9	22
1991-07-24	11	23
1991-07-25	13	25
1991-07-26	10	17
1991-07-27	8	20
1991-07-28	7	20
1991-07-29	9	23
1991-07-30	10	23
1991-07-31	10	22
1991-08-01	9	22
1991-08-02	6	12
1991-08-03	5	18
1991-08-04	9	22
1991-08-05	11	23
1991-08-06	12	24
1991-08-07	11	21
1991-08-08	10	25
1991-08-09	12	25
1991-08-10	14	28
1991-08-11	10	21
1991-08-12	9	17
1991-08-13	9	20
1991-08-14	8	20
1991-08-15	6	15
1991-08-16	6	19
1991-08-17	9	21
1991-08-18	13	23
1991-08-19	11	23
1991-08-20	12	23
1991-08-21	10	23
1991-08-22	11	24
1991-08-23	10	24
1991-08-24	7	21
1991-08-25	7	21
1991-08-26	6	16
1991-08-27	3	17
1991-08-28	9	19
1991-08-29	8	15
1991-08-30	6	19
1991-08-31	11	24
1991-09-01	14	26
1991-09-02	5	18
1991-09-03	3	15
1991-09-04	4	15
1991-09-05	7	18
1991-09-06	8	19
1991-09-07	8	21
1991-09-08	8	16
1991-09-09	1	11
1991-09-10	1	10
1991-09-11	3	15
1991-09-12	6	16
1991-09-13	5	16
1991-09-14	3	10
1991-09-15	0	6
1991-09-16	1	10
1991-09-17	3	11
1991-09-18	2	9
1991-09-19	0	10
1991-09-20	3	14
1991-09-21	6	17
1991-09-22	-2	6
1991-09-23	-2	4
1991-09-24	0	9
1991-09-25	2	13
1991-09-26	9	16
1991-09-27	8	18
1991-09-28	10	18
1991-09-29	9	18
1991-09-30	7	14
1991-10-01	5	14
1991-10-02	5	14
1991-10-03	2	11
1991-10-04	-1	5
1991-10-05	-4	4
1991-10-06	-1	8
1991-10-07	3	14
1991-10-08	3	12
1991-10-09	1	10
1991-10-10	3	12
1991-10-11	6	16
1991-10-12	9	19
1991-10-13	3	12
1991-10-14	0	8
1991-10-15	3	12
1991-10-16	6	14
1991-10-17	-2	10
1991-10-18	-5	1
1991-10-19	-7	1
1991-10-20	-3	4
1991-10-21	-2	6
1991-10-22	-2	5
1991-10-23	-7	-2
1991-10-24	-6	-4
1991-10-25	-4	-3
1991-10-26	-7	-3
1991-10-27	-12	-6
1991-10-28	-12	-7
1991-10-29	-15	-9
1991-10-30	-17	-12
1991-10-31	-17	-10
1991-11-01	-16	-8
1991-11-02	-19	-15
1991-11-03	-19	-14
1991-11-04	-15	-6
1991-11-05	-7	-2
1991-11-06	-2	0
1991-11-07	-5	0
1991-11-08	-5	2
1991-11-09	0	3
1991-11-10	-1	2
1991-11-11	-1	0
1991-11-12	-3	2
1991-11-13	0	2
1991-11-14	-5	0
1991-11-15	-7	-2
1991-11-16	-9	-4
1991-11-17	-8	-1
1991-11-18	-4	2
1991-11-19	-4	-3
1991-11-20	-4	-2
1991-11-21	-4	-1
1991-11-22	-7	-4
1991-11-23	-11	-6
1991-11-24	-12	-5
1991-11-25	-6	-2
1991-11-26	-4	-1
1991-11-27	-5	-3
1991-11-28	-9	-4
1991-11-29	-8	-6
1991-11-30	-15	-8
1991-12-01	-14	-11
1991-12-02	-11	-4
1991-12-03	-7	-4
1991-12-04	-7	-3
1991-12-05	-3	-2
1991-12-06	-3	0
1991-12-07	-2	-1
1991-12-08	-6	-2
1991-12-09	-7	-3
1991-12-10	-6	-2
1991-12-11	-10	-4
1991-12-12	-8	-5
1991-12-13	-6	-3
1991-12-14	-13	-6
1991-12-15	-11	-6
1991-12-16	-10	-6
1991-12-17	-9	-6
1991-12-18	-7	-3
1991-12-19	-5	-1
1991-12-20	-9	-4
1991-12-21	-10	-6
1991-12-22	-9	-3
1991-12-23	-5	-3
1991-12-24	-5	-1
1991-12-25	-4	-1
1991-12-26	-6	-2
1991-12-27	-5	-1
1991-12-28	-4	0
1991-12-29	-5	0
1991-12-30	-5	-1
1991-12-31	-6	-3
1992-01-01	-8	-4
1992-01-02	-8	-4
1992-01-03	-9	-4
1992-01-04	-10	-3
1992-01-05	-6	-4
1992-01-06	-9	-1
1992-01-07	-5	-2
1992-01-08	-9	-5
1992-01-09	-11	-8
1992-01-10	-11	0
1992-01-11	-5	0
1992-01-12	-6	-4
1992-01-13	-9	-6
1992-01-14	-9	-7
1992-01-15	-12	-6
1992-01-16	-9	-2
1992-01-17	-10	-2
1992-01-18	-9	-6
1992-01-19	-9	-5
1992-01-20	-8	-3
1992-01-21	-8	-4
1992-01-22	-9	-7
1992-01-23	-9	-6
1992-01-24	-6	-2
1992-01-25	-4	0
1992-01-26	-3	0
1992-01-27	-6	0
1992-01-28	-4	0
1992-01-29	-3	0
1992-01-30	-3	0
1992-01-31	-2	2
1992-02-01	0	4
1992-02-02	-2	3
1992-02-03	-6	1
1992-02-04	-6	-1
1992-02-05	-4	1
1992-02-06	-5	-1
1992-02-07	-5	0
1992-02-08	-5	0
1992-02-09	-5	-3
1992-02-10	-5	-1
1992-02-11	-4	1
1992-02-12	-3	1
1992-02-13	-3	3
1992-02-14	-4	0
1992-02-15	-4	2
1992-02-16	-5	2
1992-02-17	-9	-2
1992-02-18	-8	-1
1992-02-19	-6	-1
1992-02-20	-8	-1
1992-02-21	-3	1
1992-02-22	-3	0
1992-02-23	-4	0
1992-02-24	-6	3
1992-02-25	-4	0
1992-02-26	-3	2
1992-02-27	-2	4
1992-02-28	-2	6
1992-02-29	-1	7
1992-03-01	-1	8
1992-03-02	0	6
1992-03-03	-2	4
1992-03-04	-3	8
1992-03-05	-2	4
1992-03-06	-3	6
1992-03-07	-2	7
1992-03-08	-5	7
1992-03-09	-7	1
1992-03-10	-7	4
1992-03-11	-5	6
1992-03-12	-4	6
1992-03-13	-1	8
1992-03-14	1	11
1992-03-15	2	12
1992-03-16	1	9
1992-03-17	-1	4
1992-03-18	-2	1
1992-03-19	-2	3
1992-03-20	-2	0
1992-03-21	-8	0
1992-03-22	-10	3
1992-03-23	-5	8
1992-03-24	-2	9
1992-03-25	-4	4
1992-03-26	-3	8
1992-03-27	-1	10
1992-03-28	-3	2
1992-03-29	-10	3
1992-03-30	-4	6
1992-03-31	-2	12
1992-04-01	1	11
1992-04-02	1	12
1992-04-03	2	14
1992-04-04	1	11
1992-04-05	-5	1
1992-04-06	-6	1
1992-04-07	-6	0
1992-04-08	-7	0
1992-04-09	-7	2
1992-04-10	-6	0
1992-04-11	-4	4
1992-04-12	-4	6
1992-04-13	-1	2
1992-04-14	0	8
1992-04-15	0	7
1992-04-16	1	13
1992-04-17	2	13
1992-04-18	-1	2
1992-04-19	-1	5
1992-04-20	-2	8
1992-04-21	-2	10
1992-04-22	0	4
1992-04-23	-3	5
1992-04-24	-4	3
1992-04-25	-6	9
1992-04-26	0	14
1992-04-27	5	18
1992-04-28	4	9
1992-04-29	3	6
1992-04-30	3	15
1992-05-01	-2	5
1992-05-02	-5	8
1992-05-03	-2	11
1992-05-04	1	13
1992-05-05	5	16
1992-05-06	7	19
1992-05-07	8	20
1992-05-08	7	18
1992-05-09	0	15
1992-05-10	0	8
1992-05-11	-1	3
1992-05-12	-3	4
1992-05-13	-4	8
1992-05-14	-2	11
1992-05-15	0	13
1992-05-16	-4	14
1992-05-17	-5	10
1992-05-18	3	17
1992-05-19	6	17
1992-05-20	4	14
1992-05-21	-1	8
1992-05-22	-2	11
1992-05-23	-1	14
1992-05-24	5	17
1992-05-25	5	17
1992-05-26	5	19
1992-05-27	5	13
1992-05-28	3	12
1992-05-29	3	14
1992-05-30	4	12
1992-05-31	2	15
1992-06-01	3	17
1992-06-02	7	20
1992-06-03	5	18
1992-06-04	1	15
1992-06-05	2	15
1992-06-06	1	12
1992-06-07	2	16
1992-06-08	5	18
1992-06-09	7	21
1992-06-10	9	24
1992-06-11	8	22
1992-06-12	8	18
1992-06-13	8	19
1992-06-14	0	12
1992-06-15	-1	10
1992-06-16	4	10
1992-06-17	5	12
1992-06-18	7	13
1992-06-19	6	19
1992-06-20	9	22
1992-06-21	10	23
1992-06-22	10	24
1992-06-23	12	25
1992-06-24	13	27
1992-06-25	13	24
1992-06-26	12	24
1992-06-27	11	24
1992-06-28	10	23
1992-06-29	10	20
1992-06-30	5	11
1992-07-01	3	6
1992-07-02	3	12
1992-07-03	4	13
1992-07-04	4	12
1992-07-05	6	19
1992-07-06	5	17
1992-07-07	5	10
1992-07-08	5	14
1992-07-09	5	12
1992-07-10	4	9
1992-07-11	4	14
1992-07-12	5	13
1992-07-13	4	18
1992-07-14	7	16
1992-07-15	7	17
1992-07-16	4	16
1992-07-17	7	19
1992-07-18	9	23
1992-07-19	9	25
1992-07-20	8	14
1992-07-21	8	17
1992-07-22	8	19
1992-07-23	8	21
1992-07-24	6	11
1992-07-25	5	10
1992-07-26	5	18
1992-07-27	7	21
1992-07-28	9	23
1992-07-29	10	19
1992-07-30	9	19
1992-07-31	10	22
1992-08-01	13	25
1992-08-02	11	26
1992-08-03	13	25
1992-08-04	10	22
1992-08-05	10	22
1992-08-06	9	22
1992-08-07	7	21
1992-08-08	6	16
1992-08-09	5	14
1992-08-10	3	16
1992-08-11	6	19
1992-08-12	10	22
1992-08-13	12	24
1992-08-14	14	24
1992-08-15	13	27
1992-08-16	13	23
1992-08-17	12	24
1992-08-18	13	25
1992-08-19	12	24
1992-08-20	12	24
1992-08-21	7	16
1992-08-22	1	17
1992-08-23	-4	0
1992-08-24	-4	1
1992-08-25	-5	6
1992-08-26	-2	9
1992-08-27	2	14
1992-08-28	5	17
1992-08-29	4	16
1992-08-30	2	12
1992-08-31	6	16
1992-09-01	8	17
1992-09-02	8	17
1992-09-03	7	17
1992-09-04	6	19
1992-09-05	2	10
1992-09-06	-1	6
1992-09-07	-2	7
1992-09-08	-2	7
1992-09-09	0	4
1992-09-10	-2	10
1992-09-11	2	14
1992-09-12	6	18
1992-09-13	0	7
1992-09-14	-2	0
1992-09-15	-3	5
1992-09-16	0	1
1992-09-17	0	6
1992-09-18	1	8
1992-09-19	-1	9
1992-09-20	3	12
1992-09-21	5	7
1992-09-22	7	14
1992-09-23	6	17
1992-09-24	9	17
1992-09-25	0	9
1992-09-26	0	2
1992-09-27	0	5
1992-09-28	-1	5
1992-09-29	1	12
1992-09-30	7	18
1992-10-01	12	22
1992-10-02	13	22
1992-10-03	16	22
1992-10-04	6	18
1992-10-05	3	7
1992-10-06	0	8
1992-10-07	-2	3
1992-10-08	-3	5
1992-10-09	0	5
1992-10-10	0	5
1992-10-11	-1	8
1992-10-12	2	11
1992-10-13	5	10
1992-10-14	-4	6
1992-10-15	-8	-2
1992-10-16	-9	-4
1992-10-17	-8	0
1992-10-18	-3	0
1992-10-19	-2	4
1992-10-20	0	5
1992-10-21	3	11
1992-10-22	3	10
1992-10-23	2	6
1992-10-24	3	10
1992-10-25	4	11
1992-10-26	2	7
1992-10-27	0	6
1992-10-28	-3	3
1992-10-29	-2	4
1992-10-30	0	3
1992-10-31	-1	3
1992-11-01	-1	0
1992-11-02	-3	0
1992-11-03	-5	-1
1992-11-04	-8	-2
1992-11-05	-8	-4
1992-11-06	-4	-4
1992-11-07	-4	-1
1992-11-08	-2	0
1992-11-09	-5	-1
1992-11-10	-6	-3
1992-11-11	-8	-5
1992-11-12	-7	-4
1992-11-13	-4	-2
1992-11-14	-3	0
1992-11-15	-1	1
1992-11-16	-2	1
1992-11-17	-2	2
1992-11-18	-2	0
1992-11-19	-3	-2
1992-11-20	-6	-2
1992-11-21	-5	-4
1992-11-22	-9	-3
1992-11-23	-10	-3
1992-11-24	-14	-10
1992-11-25	-13	-10
1992-11-26	-13	-9
1992-11-27	-12	-7
1992-11-28	-8	-4
1992-11-29	-7	-1
1992-11-30	-8	-6
1992-12-01	-8	-4
1992-12-02	-11	-8
1992-12-03	-13	-9
1992-12-04	-16	-11
1992-12-05	-16	-10
1992-12-06	-14	-7
1992-12-07	-13	-8
1992-12-08	-11	-4
1992-12-09	-7	-4
1992-12-10	-9	-4
1992-12-11	-8	-2
1992-12-12	-11	-6
1992-12-13	-12	-6
1992-12-14	-11	-9
1992-12-15	-9	-3
1992-12-16	-12	-7
1992-12-17	-14	-9
1992-12-18	-12	-8
1992-12-19	-15	-10
1992-12-20	-16	-8
1992-12-21	-8	-6
1992-12-22	-7	-6
1992-12-23	-7	-4
1992-12-24	-6	-3
1992-12-25	-8	-3
1992-12-26	-8	-4
1992-12-27	-7	-5
1992-12-28	-25	-6
1992-12-29	-23	-10
1992-12-30	-18	-9
1992-12-31	-20	-8
1993-01-01	-12	-6
1993-01-02	-14	-4
1993-01-03	-15	-12
1993-01-04	-15	-10
1993-01-05	-21	-10
1993-01-06	-22	-16
1993-01-07	-18	-12
1993-01-08	-18	-7
1993-01-09	-20	-9
1993-01-10	-20	-18
1993-01-11	-20	-12
1993-01-12	-18	-12
1993-01-13	-17	-13
1993-01-14	-15	-9
1993-01-15	-11	-3
1993-01-16	-9	-6
1993-01-17	-11	-7
1993-01-18	-10	-5
1993-01-19	-13	-8
1993-01-20	-11	-4
1993-01-21	-5	-2
1993-01-22	-9	-5
1993-01-23	-10	-5
1993-01-24	-14	-8
1993-01-25	-12	-3
1993-01-26	-3	0
1993-01-27	-3	-1
1993-01-28	-4	-2
1993-01-29	-5	-1
1993-01-30	-5	-3
1993-01-31	-5	-2
1993-02-01	-8	-2
1993-02-02	-6	-2
1993-02-03	-7	-3
1993-02-04	-6	-2
1993-02-05	-5	0
1993-02-06	-4	1
1993-02-07	-6	1
1993-02-08	-4	3
1993-02-09	-4	2
1993-02-10	-10	-4
1993-02-11	-10	-4
1993-02-12	-8	0
1993-02-13	-7	-1
1993-02-14	-8	-4
1993-02-15	-21	-7
1993-02-16	-23	-20
1993-02-17	-25	-20
1993-02-18	-24	-18
1993-02-19	-18	-7
1993-02-20	-17	-7
1993-02-21	-16	-8
1993-02-22	-15	-8
1993-02-23	-13	-7
1993-02-24	-17	-11
1993-02-25	-16	-11
1993-02-26	-17	-8
1993-02-27	-15	-8
1993-02-28	-14	-4
1993-03-01	-10	0
1993-03-02	-7	2
1993-03-03	-9	-1
1993-03-04	-10	0
1993-03-05	-5	0
1993-03-06	-2	0
1993-03-07	-1	4
1993-03-08	-2	8
1993-03-09	-4	2
1993-03-10	-8	1
1993-03-11	-10	1
1993-03-12	-14	-3
1993-03-13	-15	-3
1993-03-14	-10	2
1993-03-15	-6	-2
1993-03-16	-15	-1
1993-03-17	-17	-4
1993-03-18	-9	0
1993-03-19	-4	2
1993-03-20	-5	4
1993-03-21	-4	0
1993-03-22	-4	2
1993-03-23	-1	8
1993-03-24	-1	7
1993-03-25	-1	7
1993-03-26	-2	6
1993-03-27	-1	4
1993-03-28	-3	1
1993-03-29	-2	4
1993-03-30	-2	6
1993-03-31	-2	4
1993-04-01	-2	5
1993-04-02	0	12
1993-04-03	0	12
1993-04-04	-1	5
1993-04-05	-1	6
1993-04-06	-5	0
1993-04-07	-5	3
1993-04-08	-5	4
1993-04-09	-4	10
1993-04-10	-2	5
1993-04-11	-3	8
1993-04-12	-4	2
1993-04-13	-4	6
1993-04-14	-6	6
1993-04-15	-4	10
1993-04-16	-3	5
1993-04-17	-2	5
1993-04-18	-1	5
1993-04-19	-2	0
1993-04-20	-3	1
1993-04-21	-5	12
1993-04-22	-2	7
1993-04-23	-2	11
1993-04-24	-3	4
1993-04-25	-4	6
1993-04-26	-1	3
1993-04-27	-2	3
1993-04-28	-2	4
1993-04-29	-2	7
1993-04-30	-1	7
1993-05-01	-1	6
1993-05-02	0	8
1993-05-03	-2	7
1993-05-04	-3	12
1993-05-05	3	7
1993-05-06	3	13
1993-05-07	0	7
1993-05-08	-3	1
1993-05-09	-3	6
1993-05-10	-1	12
1993-05-11	4	17
1993-05-12	8	22
1993-05-13	11	23
1993-05-14	10	21
1993-05-15	8	21
1993-05-16	6	18
1993-05-17	5	17
1993-05-18	3	18
1993-05-19	6	19
1993-05-20	7	19
1993-05-21	6	16
1993-05-22	1	11
1993-05-23	0	6
1993-05-24	0	10
1993-05-25	0	14
1993-05-26	4	18
1993-05-27	4	9
1993-05-28	3	16
1993-05-29	3	16
1993-05-30	1	12
1993-05-31	4	16
1993-06-01	4	20
1993-06-02	3	8
1993-06-03	2	11
1993-06-04	1	12
1993-06-05	2	15
1993-06-06	2	14
1993-06-07	4	12
1993-06-08	3	8
1993-06-09	2	4
1993-06-10	1	12
1993-06-11	4	11
1993-06-12	0	9
1993-06-13	-2	1
1993-06-14	1	15
1993-06-15	4	20
1993-06-16	4	10
1993-06-17	2	9
1993-06-18	1	16
1993-06-19	7	19
1993-06-20	7	23
1993-06-21	8	25
1993-06-22	4	21
1993-06-23	-1	4
1993-06-24	-2	1
1993-06-25	1	5
1993-06-26	3	17
1993-06-27	6	23
1993-06-28	8	15
1993-06-29	1	11
1993-06-30	0	3
1993-07-01	2	12
1993-07-02	3	12
1993-07-03	3	9
1993-07-04	2	9
1993-07-05	4	7
1993-07-06	4	8
1993-07-07	4	10
1993-07-08	3	8
1993-07-09	4	14
1993-07-10	4	11
1993-07-11	4	10
1993-07-12	3	17
1993-07-13	1	8
1993-07-14	6	13
1993-07-15	2	8
1993-07-16	4	12
1993-07-17	2	10
1993-07-18	3	11
1993-07-19	1	12
1993-07-20	2	15
1993-07-21	1	11
1993-07-22	1	5
1993-07-23	2	11
1993-07-24	4	11
1993-07-25	3	9
1993-07-26	5	15
1993-07-27	6	10
1993-07-28	7	17
1993-07-29	8	23
1993-07-30	7	22
1993-07-31	5	14
1993-08-01	3	17
1993-08-02	6	18
1993-08-03	9	19
1993-08-04	8	18
1993-08-05	9	18
1993-08-06	9	20
1993-08-07	9	20
1993-08-08	9	20
1993-08-09	7	20
1993-08-10	10	22
1993-08-11	9	21
1993-08-12	8	17
1993-08-13	6	18
1993-08-14	7	18
1993-08-15	7	19
1993-08-16	8	16
1993-08-17	6	10
1993-08-18	6	9
1993-08-19	6	14
1993-08-20	10	20
1993-08-21	11	22
1993-08-22	9	11
1993-08-23	8	15
1993-08-24	6	14
1993-08-25	0	9
1993-08-26	-1	10
1993-08-27	2	12
1993-08-28	3	12
1993-08-29	2	10
1993-08-30	1	8
1993-08-31	1	12
1993-09-01	3	12
1993-09-02	4	12
1993-09-03	3	14
1993-09-04	6	17
1993-09-05	6	19
1993-09-06	5	12
1993-09-07	5	16
1993-09-08	6	16
1993-09-09	8	19
1993-09-10	7	16
1993-09-11	7	18
1993-09-12	3	16
1993-09-13	-2	3
1993-09-14	-3	5
1993-09-15	-1	9
1993-09-16	0	3
1993-09-17	0	8
1993-09-18	0	10
1993-09-19	1	10
1993-09-20	1	10
1993-09-21	-2	9
1993-09-22	-3	1
1993-09-23	-2	4
1993-09-24	0	7
1993-09-25	1	10
1993-09-26	1	10
1993-09-27	2	11
1993-09-28	5	15
1993-09-29	6	15
1993-09-30	5	15
1993-10-01	5	12
1993-10-02	4	11
1993-10-03	4	13
1993-10-04	6	16
1993-10-05	6	15
1993-10-06	8	16
1993-10-07	5	12
1993-10-08	-3	5
1993-10-09	-2	4
1993-10-10	0	7
1993-10-11	-1	7
1993-10-12	1	10
1993-10-13	2	8
1993-10-14	3	6
1993-10-15	2	3
1993-10-16	2	3
1993-10-17	0	2
1993-10-18	-1	2
1993-10-19	0	1
1993-10-20	-3	2
1993-10-21	-5	1
1993-10-22	-1	6
1993-10-23	0	7
1993-10-24	3	7
1993-10-25	0	7
1993-10-26	-2	3
1993-10-27	-3	2
1993-10-28	-2	5
1993-10-29	-7	1
1993-10-30	-10	-3
1993-10-31	-6	2
1993-11-01	-2	0
1993-11-02	-7	-1
1993-11-03	-5	0
1993-11-04	-3	1
1993-11-05	-12	-3
1993-11-06	-13	-6
1993-11-07	-7	-5
1993-11-08	-6	-4
1993-11-09	-7	-4
1993-11-10	-8	-2
1993-11-11	-6	-2
1993-11-12	-6	-2
1993-11-13	-6	-1
1993-11-14	-11	-4
1993-11-15	-11	-5
1993-11-16	-7	-2
1993-11-17	-8	-4
1993-11-18	-5	-3
1993-11-19	-8	-4
1993-11-20	-7	-5
1993-11-21	-8	-4
1993-11-22	-17	-4
1993-11-23	-27	-14
1993-11-24	-27	-21
1993-11-25	-25	-20
1993-11-26	-21	-15
1993-11-27	-15	-10
1993-11-28	-10	-5
1993-11-29	-5	1
1993-11-30	-3	-1
1993-12-01	-7	-1
1993-12-02	-6	-2
1993-12-03	-5	-3
1993-12-04	-5	-1
1993-12-05	-7	-1
1993-12-06	-13	-7
1993-12-07	-13	-8
1993-12-08	-9	-4
1993-12-09	-4	-1
1993-12-10	-5	-2
1993-12-11	-2	2
1993-12-12	-1	3
1993-12-13	-10	-1
1993-12-14	-10	-3
1993-12-15	-6	-2
1993-12-16	-7	-3
1993-12-17	-8	-4
1993-12-18	-12	-7
1993-12-19	-11	-8
1993-12-20	-12	-8
1993-12-21	-10	-8
1993-12-22	-10	-8
1993-12-23	-11	-8
1993-12-24	-10	-9
1993-12-25	-10	-6
1993-12-26	-7	-3
1993-12-27	-7	-2
1993-12-28	-10	-5
1993-12-29	-10	-5
1993-12-30	-6	-3
1993-12-31	-6	-1
1994-01-01	-5	-4
1994-01-02	-4	-3
1994-01-03	-4	-2
1994-01-04	-5	-2
1994-01-05	-3	0
1994-01-06	-8	-3
1994-01-07	-14	-8
1994-01-08	-10	-6
1994-01-09	-6	-4
1994-01-10	-4	-3
1994-01-11	-5	-3
1994-01-12	-4	-3
1994-01-13	-3	-2
1994-01-14	-2	0
1994-01-15	-1	0
1994-01-16	-4	-1
1994-01-17	-4	-4
1994-01-18	-4	-3
1994-01-19	-4	-1
1994-01-20	-6	-2
1994-01-21	-6	-2
1994-01-22	-3	0
1994-01-23	-2	-1
1994-01-24	-2	2
1994-01-25	-4	2
1994-01-26	-5	-1
1994-01-27	-7	-3
1994-01-28	-8	-1
1994-01-29	-9	-5
1994-01-30	-14	-4
1994-01-31	-14	-7
1994-02-01	-12	-7
1994-02-02	-11	-6
1994-02-03	-12	-8
1994-02-04	-12	-4
1994-02-05	-12	-6
1994-02-06	-13	-7
1994-02-07	-26	-8
1994-02-08	-27	-24
1994-02-09	-28	-16
1994-02-10	-16	-10
1994-02-11	-12	-5
1994-02-12	-12	-9
1994-02-13	-9	-7
1994-02-14	-7	-5
1994-02-15	-9	-4
1994-02-16	-6	-3
1994-02-17	-6	2
1994-02-18	-2	4
1994-02-19	-8	-1
1994-02-20	-8	-5
1994-02-21	-7	-1
1994-02-22	-9	-1
1994-02-23	-9	-4
1994-02-24	-15	-4
1994-02-25	-21	-16
1994-02-26	-19	-6
1994-02-27	-6	0
1994-02-28	-4	0
1994-03-01	-4	0
1994-03-02	0	3
1994-03-03	0	7
1994-03-04	0	2
1994-03-05	-4	1
1994-03-06	-8	1
1994-03-07	-10	0
1994-03-08	-12	-3
1994-03-09	-10	0
1994-03-10	-8	2
1994-03-11	-3	3
1994-03-12	-5	2
1994-03-13	-6	4
1994-03-14	-1	6
1994-03-15	0	9
1994-03-16	0	11
1994-03-17	-5	5
1994-03-18	-6	-2
1994-03-19	-7	0
1994-03-20	-9	-3
1994-03-21	-9	-2
1994-03-22	-8	1
1994-03-23	-10	-1
1994-03-24	-11	-1
1994-03-25	-11	4
1994-03-26	-10	2
1994-03-27	-6	4
1994-03-28	-7	4
1994-03-29	-5	5
1994-03-30	-6	8
1994-03-31	-1	11
1994-04-01	1	14
1994-04-02	-1	9
1994-04-03	-2	9
1994-04-04	-4	3
1994-04-05	-5	4
1994-04-06	-5	-1
1994-04-07	-5	1
1994-04-08	-5	3
1994-04-09	-4	8
1994-04-10	-3	11
1994-04-11	-2	7
1994-04-12	-1	8
1994-04-13	-2	6
1994-04-14	-4	-2
1994-04-15	-5	2
1994-04-16	-4	10
1994-04-17	3	16
1994-04-18	6	16
1994-04-19	5	13
1994-04-20	3	12
1994-04-21	3	15
1994-04-22	4	16
1994-04-23	1	6
1994-04-24	0	8
1994-04-25	-1	4
1994-04-26	-5	-1
1994-04-27	-6	1
1994-04-28	-7	1
1994-04-29	-7	4
1994-04-30	-5	9
1994-05-01	0	10
1994-05-02	-2	7
1994-05-03	-1	5
1994-05-04	-1	10
1994-05-05	2	8
1994-05-06	1	11
1994-05-07	3	14
1994-05-08	6	18
1994-05-09	5	17
1994-05-10	7	18
1994-05-11	6	16
1994-05-12	6	18
1994-05-13	3	12
1994-05-14	0	10
1994-05-15	-1	12
1994-05-16	0	12
1994-05-17	0	11
1994-05-18	1	4
1994-05-19	0	9
1994-05-20	0	5
1994-05-21	0	6
1994-05-22	0	6
1994-05-23	0	13
1994-05-24	3	16
1994-05-25	5	18
1994-05-26	7	20
1994-05-27	6	21
1994-05-28	0	11
1994-05-29	-2	11
1994-05-30	0	2
1994-05-31	0	11
1994-06-01	2	14
1994-06-02	2	6
1994-06-03	0	14
1994-06-04	6	18
1994-06-05	3	9
1994-06-06	2	16
1994-06-07	1	14
1994-06-08	0	6
1994-06-09	0	5
1994-06-10	1	10
1994-06-11	2	16
1994-06-12	6	18
1994-06-13	6	12
1994-06-14	1	6
1994-06-15	-1	4
1994-06-16	0	6
1994-06-17	0	7
1994-06-18	2	13
1994-06-19	3	20
1994-06-20	1	17
1994-06-21	8	24
1994-06-22	12	25
1994-06-23	11	25
1994-06-24	11	25
1994-06-25	6	19
1994-06-26	5	22
1994-06-27	3	11
1994-06-28	4	16
1994-06-29	6	22
1994-06-30	8	24
1994-07-01	7	23
1994-07-02	8	23
1994-07-03	2	9
1994-07-04	0	8
1994-07-05	3	17
1994-07-06	6	13
1994-07-07	5	18
1994-07-08	6	20
1994-07-09	10	24
1994-07-10	11	25
1994-07-11	9	22
1994-07-12	7	23
1994-07-13	8	19
1994-07-14	8	21
1994-07-15	8	20
1994-07-16	8	19
1994-07-17	8	21
1994-07-18	11	26
1994-07-19	9	18
1994-07-20	7	21
1994-07-21	10	24
1994-07-22	12	28
1994-07-23	13	25
1994-07-24	16	28
1994-07-25	15	27
1994-07-26	14	24
1994-07-27	14	28
1994-07-28	12	26
1994-07-29	14	26
1994-07-30	15	26
1994-07-31	13	22
1994-08-01	11	25
1994-08-02	13	20
1994-08-03	12	27
1994-08-04	14	25
1994-08-05	10	25
1994-08-06	10	26
1994-08-07	7	20
1994-08-08	10	24
1994-08-09	10	23
1994-08-10	9	21
1994-08-11	9	24
1994-08-12	12	24
1994-08-13	11	24
1994-08-14	14	26
1994-08-15	16	29
1994-08-16	10	23
1994-08-17	7	21
1994-08-18	7	19
1994-08-19	8	20
1994-08-20	10	24
1994-08-21	13	23
1994-08-22	9	22
1994-08-23	8	14
1994-08-24	7	14
1994-08-25	7	17
1994-08-26	8	18
1994-08-27	5	17
1994-08-28	5	16
1994-08-29	7	20
1994-08-30	7	18
1994-08-31	5	11
1994-09-01	5	12
1994-09-02	5	16
1994-09-03	8	18
1994-09-04	4	9
1994-09-05	3	7
1994-09-06	2	12
1994-09-07	6	17
1994-09-08	9	20
1994-09-09	10	21
1994-09-10	1	15
1994-09-11	3	10
1994-09-12	2	10
1994-09-13	2	12
1994-09-14	4	15
1994-09-15	3	14
1994-09-16	5	14
1994-09-17	5	15
1994-09-18	10	19
1994-09-19	9	19
1994-09-20	9	19
1994-09-21	2	18
1994-09-22	1	10
1994-09-23	5	15
1994-09-24	8	19
1994-09-25	10	22
1994-09-26	10	20
1994-09-27	8	18
1994-09-28	8	19
1994-09-29	9	19
1994-09-30	6	15
1994-10-01	5	14
1994-10-02	1	15
1994-10-03	-4	1
1994-10-04	-4	1
1994-10-05	-3	6
1994-10-06	1	9
1994-10-07	1	9
1994-10-08	0	8
1994-10-09	0	10
1994-10-10	4	13
1994-10-11	4	12
1994-10-12	-1	4
1994-10-13	-3	2
1994-10-14	-3	4
1994-10-15	-2	2
1994-10-16	-2	0
1994-10-17	-3	3
1994-10-18	-2	2
1994-10-19	-1	2
1994-10-20	-2	4
1994-10-21	-1	1
1994-10-22	-3	1
1994-10-23	-4	0
1994-10-24	-4	0
1994-10-25	-3	2
1994-10-26	-1	6
1994-10-27	1	6
1994-10-28	-1	2
1994-10-29	-4	-1
1994-10-30	-8	-3
1994-10-31	-6	-4
1994-11-01	-5	0
1994-11-02	-6	-2
1994-11-03	-9	-5
1994-11-04	-9	-7
1994-11-05	-9	-4
1994-11-06	-9	-3
1994-11-07	-8	-1
1994-11-08	-7	-5
1994-11-09	-8	-2
1994-11-10	-7	-2
1994-11-11	-3	1
1994-11-12	-6	0
1994-11-13	-7	-2
1994-11-14	-9	-5
1994-11-15	-8	-4
1994-11-16	-8	-4
1994-11-17	-7	-4
1994-11-18	-16	-7
1994-11-19	-16	-9
1994-11-20	-11	-4
1994-11-21	-12	-4
1994-11-22	-15	-11
1994-11-23	-16	-9
1994-11-24	-9	-4
1994-11-25	-6	-2
1994-11-26	-4	1
1994-11-27	-9	-4
1994-11-28	-10	-8
1994-11-29	-10	-7
1994-11-30	-10	-2
1994-12-01	-2	0
1994-12-02	-6	-1
1994-12-03	-9	-4
1994-12-04	-15	-8
1994-12-05	-19	-10
1994-12-06	-21	-10
1994-12-07	-12	-6
1994-12-08	-12	-9
1994-12-09	-11	-9
1994-12-10	-12	-8
1994-12-11	-12	-7
1994-12-12	-10	-5
1994-12-13	-10	-4
1994-12-14	-10	-6
1994-12-15	-9	-8
1994-12-16	-9	-7
1994-12-17	-7	-3
1994-12-18	-4	0
1994-12-19	-3	0
1994-12-20	-5	-2
1994-12-21	-3	1
1994-12-22	-4	0
1994-12-23	-4	0
1994-12-24	-3	1
1994-12-25	-3	2
1994-12-26	-6	-2
1994-12-27	-6	-2
1994-12-28	-2	0
1994-12-29	-8	0
1994-12-30	-10	-7
1994-12-31	-16	-10
1995-01-01	-17	-11
1995-01-02	-16	-9
1995-01-03	-16	-9
1995-01-04	-16	-10
1995-01-05	-13	-10
1995-01-06	-13	-8
1995-01-07	-14	-9
1995-01-08	-9	-4
1995-01-09	-6	-2
1995-01-10	-2	1
1995-01-11	0	2
1995-01-12	-3	0
1995-01-13	-3	-1
1995-01-14	-3	0
1995-01-15	-2	0
1995-01-16	-7	0
1995-01-17	-8	-3
1995-01-18	-8	-5
1995-01-19	-8	-3
1995-01-20	-8	-1
1995-01-21	-10	-5
1995-01-22	-14	-7
1995-01-23	-15	-7
1995-01-24	-10	-6
1995-01-25	-8	-2
1995-01-26	-5	2
1995-01-27	-4	2
1995-01-28	-6	-3
1995-01-29	-9	-2
1995-01-30	-8	-2
1995-01-31	-1	1
1995-02-01	0	2
1995-02-02	-3	2
1995-02-03	-6	0
1995-02-04	-6	0
1995-02-05	-2	3
1995-02-06	-1	1
1995-02-07	-1	4
1995-02-08	-5	2
1995-02-09	-6	-1
1995-02-10	-8	0
1995-02-11	-17	-8
1995-02-12	-23	-15
1995-02-13	-26	-22
1995-02-14	-25	-17
1995-02-15	-22	-15
1995-02-16	-16	-8
1995-02-17	-8	-5
1995-02-18	-5	-2
1995-02-19	-4	0
1995-02-20	0	3
1995-02-21	2	6
1995-02-22	-1	4
1995-02-23	-3	3
1995-02-24	-4	4
1995-02-25	1	8
1995-02-26	-2	2
1995-02-27	-15	0
1995-02-28	-16	-7
1995-03-01	-18	-11
1995-03-02	-18	-10
1995-03-03	-15	-6
1995-03-04	-12	-4
1995-03-05	-12	-7
1995-03-06	-12	-6
1995-03-07	-12	-6
1995-03-08	-11	-2
1995-03-09	-9	-1
1995-03-10	-1	3
1995-03-11	0	6
1995-03-12	-1	5
1995-03-13	-3	3
1995-03-14	-6	-1
1995-03-15	-2	5
1995-03-16	-3	4
1995-03-17	-6	3
1995-03-18	-7	5
1995-03-19	-3	6
1995-03-20	-7	-1
1995-03-21	-7	3
1995-03-22	-7	1
1995-03-23	-9	4
1995-03-24	-4	7
1995-03-25	-6	-2
1995-03-26	-9	1
1995-03-27	-11	2
1995-03-28	-11	2
1995-03-29	-10	3
1995-03-30	-9	5
1995-03-31	-5	9
1995-04-01	-3	12
1995-04-02	-2	2
1995-04-03	-5	7
1995-04-04	-2	6
1995-04-05	-1	8
1995-04-06	-2	6
1995-04-07	-2	2
1995-04-08	-2	2
1995-04-09	-4	0
1995-04-10	-4	1
1995-04-11	-5	9
1995-04-12	-5	4
1995-04-13	-6	6
1995-04-14	-4	5
1995-04-15	-7	-1
1995-04-16	-8	1
1995-04-17	-9	8
1995-04-18	-6	11
1995-04-19	-4	7
1995-04-20	-4	5
1995-04-21	-5	8
1995-04-22	-4	6
1995-04-23	-3	10
1995-04-24	-3	9
1995-04-25	-1	8
1995-04-26	-4	6
1995-04-27	-5	11
1995-04-28	-2	5
1995-04-29	-5	5
1995-04-30	-7	1
1995-05-01	-4	7
1995-05-02	-3	10
1995-05-03	-1	4
1995-05-04	0	7
1995-05-05	0	10
1995-05-06	3	4
1995-05-07	0	8
1995-05-08	0	9
1995-05-09	2	6
1995-05-10	3	12
1995-05-11	3	10
1995-05-12	0	4
1995-05-13	-2	2
1995-05-14	-4	10
1995-05-15	-1	14
1995-05-16	2	11
1995-05-17	2	14
1995-05-18	3	8
1995-05-19	1	13
1995-05-20	0	11
1995-05-21	1	13
1995-05-22	0	11
1995-05-23	-1	12
1995-05-24	0	13
1995-05-25	2	12
1995-05-26	-3	5
1995-05-27	-3	9
1995-05-28	0	14
1995-05-29	4	18
1995-05-30	8	20
1995-05-31	8	19
1995-06-01	6	18
1995-06-02	6	19
1995-06-03	6	19
1995-06-04	6	13
1995-06-05	6	11
1995-06-06	0	8
1995-06-07	-2	2
1995-06-08	-1	5
1995-06-09	0	6
1995-06-10	1	11
1995-06-11	1	17
1995-06-12	4	14
1995-06-13	4	18
1995-06-14	5	14
1995-06-15	4	17
1995-06-16	5	14
1995-06-17	6	19
1995-06-18	4	11
1995-06-19	4	13
1995-06-20	0	9
[truncated: 2,386 more rows]

## Sheet: Fire data
								FNF = Flathead National Forest
Fire Start Date (FNF)	Acres Burned (FNF)		Fire Start DNRC	Acres Burned DNRC				DNRC = Department of Natural Resources and Conservation
1988-08-02	0.1		1981-04-17	40
1988-08-02	0.5		1981-04-18	4
1988-08-04	630		1981-04-20	8
1988-08-06	0.1		1981-06-25	0.7
1988-08-07	0.1		1981-07-04	0.5
1988-08-09	0.2		1981-07-06	0.01
1988-08-09	0.1		1981-07-12	0.01
1988-08-10	7		1981-07-13	0.01
1988-08-13	0.1		1981-07-17	0.01
1988-08-13	0.5		1981-07-18	0.01
1988-08-14	0.1		1981-07-18	0.01
1988-08-14	0.1		1981-07-23	0.01
1988-08-14	0.1		1981-07-23	0.01
1988-08-15	0.1		1981-07-23	0.01
1988-08-15	0.5		1981-07-25	0.01
1988-08-15	0.1		1981-07-28	0.01
1988-08-15	0.1		1981-07-29	0.01
1988-08-15	0.1		1981-07-30	0.01
1988-08-15	0.1		1981-08-01	0.01
1988-08-15	0.1		1981-08-02	0.01
1988-08-15	0.1		1981-08-05	1
1988-08-15	0.1		1981-08-06	0.1
1988-08-15	0.1		1981-08-09	0.2
1988-08-15	3		1981-08-14	0.01
1988-08-15	0.1		1981-08-14	0.01
1988-08-15	0.1		1981-08-14	0.01
1988-08-16	0.1		1981-08-14	0.01
1988-08-16	0.1		1981-08-14	0.1
1988-08-16	138		1981-08-14	0.2
1988-08-16	2		1981-08-15	0.01
1988-08-16	0.5		1981-08-15	0.01
1988-08-16	0.2		1981-08-15	0.01
1988-08-16	3		1981-08-16	0.1
1988-08-16	0.1		1981-08-17	0.01
1988-08-17	0.2		1981-08-17	0.01
1988-08-17	0.7		1981-08-17	0.4
1988-08-17	0.1		1981-08-22	0.01
1988-08-17	0.1		1981-08-22	2.5
1988-08-17	0.1		1981-08-23	0.01
1988-08-17	0.1		1981-08-23	0.2
1988-08-17	0.1		1981-08-24	0.01
1988-08-17	0.1		1981-08-24	0.01
1988-08-17	18		1981-08-24	0.2
1988-08-17	0.2		1981-08-25	0.01
1988-08-17	11		1981-08-25	0.01
1988-08-17	0.1		1981-08-25	0.01
1988-08-17	1		1981-08-25	0.01
1988-08-17	2.5		1981-08-25	0.01
1988-08-17	2		1981-08-25	0.01
1988-08-17	180		1981-08-25	0.01
1988-08-17	30		1981-08-25	0.01
1988-08-17	5		1981-08-25	0.01
1988-08-18	0.2		1981-08-25	0.7
1988-08-18	0.1		1981-08-25	1.5
1988-08-18	3.5		1981-08-25	2.7
1988-08-18	0.1		1981-08-25	52
1988-08-18	0.8		1981-08-26	0.01
1988-08-19	0.1		1981-08-26	0.01
1988-08-20	0.1		1981-08-26	0.01
1988-08-20	0.1		1981-08-26	0.01
1988-08-21	0.3		1981-08-26	0.01
1988-08-21	0.1		1981-08-26	0.01
1988-08-22	0.1		1981-08-26	0.01
1988-08-23	0.2		1981-08-26	0.01
1988-08-23	0.5		1981-08-26	0.01
1988-08-23	0.1		1981-08-26	0.1
1988-08-23	0.1		1981-08-26	0.1
1988-08-28	35		1981-08-26	0.2
1988-08-29	0.1		1981-08-26	0.3
1988-09-03	0.1		1981-08-26	0.5
1988-09-06	37500		1981-08-26	0.8
1988-09-27	0.1		1981-08-26	2
1988-09-30	0.1		1981-08-26	2
1988-10-02	0.1		1981-08-26	2.5
1988-10-08	1		1981-08-26	5
1988-10-08	120		1981-08-26	10
1989-04-29	0.1		1981-08-26	12
1989-05-26	3		1981-08-26	16.3
1989-06-18	0.3		1981-08-26	27
1989-07-01	0.1		1981-08-26	32
1989-07-08	0.1		1981-08-26	42
1989-07-13	0.1		1981-08-27	0.01
1989-07-18	0.1		1981-08-27	0.01
1989-07-23	0.1		1981-08-27	0.01
1989-07-24	0.1		1981-08-27	0.01
1989-07-24	0.1		1981-08-27	0.1
1989-07-25	0.1		1981-08-27	0.1
1989-07-25	0.1		1981-08-27	0.2
1989-07-25	0.1		1981-08-27	0.2
1989-07-30	0.1		1981-08-27	0.5
1989-07-31	0.1		1981-08-28	0.01
1989-07-31	0.1		1981-08-28	0.01
1989-07-31	0.3		1981-08-28	0.2
1989-07-31	0.1		1981-08-29	0.01
1989-07-31	0.1		1981-08-29	6
1989-07-31	0.1		1981-08-30	0.01
1989-07-31	0.1		1981-08-30	0.01
1989-07-31	0.1		1981-08-30	0.01
1989-07-31	0.1		1981-08-31	0.01
1989-07-31	0.3		1981-08-31	0.01
1989-08-05	0.1		1981-09-01	0.01
1989-08-05	1.5		1981-09-02	0.01
1989-08-06	0.6		1981-09-04	0.01
1989-08-07	0.2		1981-09-04	0.01
1989-08-07	0.1		1981-09-06	0.01
1989-08-07	0.1		1981-09-08	0.01
1989-08-07	0.8		1981-09-08	0.01
1989-08-10	0.1		1981-09-11	9.2
1989-08-12	0.1		1981-09-12	0.01
1989-08-13	0.1		1981-09-13	0.3
1989-08-13	0.1		1981-09-13	0.8
1989-10-14	0.1		1981-09-14	0.01
1989-10-22	0.1		1981-09-14	19.1
1990-06-24	0.1		1981-09-15	0.5
1990-07-01	0.1		1981-09-23	0.5
1990-07-06	0.1		1981-10-17	0.5
1990-07-09	0.1		1981-10-19	6
1990-07-12	0.1		1981-10-26	0.01
1990-07-17	0.1		1981-11-06	4.6
1990-07-18	0.1		1982-04-24	1
1990-07-20	0.4		1982-04-24	5.1
1990-07-24	0.1		1982-04-24	80
1990-07-30	0.1		1982-04-25	0.4
1990-07-31	0.2		1982-05-03	22.4
1990-07-31	0.1		1982-05-12	0.2
1990-08-06	0.1		1982-05-13	0.01
1990-08-08	0.1		1982-05-14	0.01
1990-08-09	0.1		1982-05-17	0.5
1990-08-10	0.1		1982-05-20	0.5
1990-08-11	0.1		1982-05-21	0.2
1990-08-13	0.1		1982-05-24	0.5
1990-08-15	0.2		1982-06-15	0.01
1990-08-15	0.1		1982-06-15	0.01
1990-08-15	0.1		1982-06-16	0.01
1990-08-15	0.1		1982-06-16	0.1
1990-08-15	3		1982-06-16	0.1
1990-08-15	0.1		1982-06-21	0.1
1990-08-15	0.1		1982-06-21	1.5
1990-08-15	0.1		1982-06-29	0.01
1990-08-15	1		1982-06-30	0.01
1990-08-15	0.5		1982-06-30	0.01
1990-08-16	0.1		1982-06-30	0.01
1990-08-16	0.1		1982-06-30	0.01
1990-09-02	0.1		1982-07-02	0.01
1990-09-05	105		1982-07-13	0.01
1990-09-14	0.1		1982-07-14	0.01
1990-09-14	0.1		1982-07-14	0.1
1990-09-15	0.5		1982-07-17	0.1
1990-09-15	0.2		1982-07-25	0.01
1990-09-15	0.1		1982-07-25	0.01
1990-09-15	0.4		1982-07-25	0.2
1990-09-15	0.1		1982-07-26	0.01
1990-09-15	0.1		1982-07-29	0.01
1990-09-15	0.1		1982-07-31	0.01
1990-09-15	0.1		1982-07-31	0.1
1990-09-15	0.1		1982-07-31	1.1
1990-09-16	0.5		1982-07-31	2
1990-09-17	1		1982-08-01	0.01
1990-09-18	35		1982-08-02	0.2
1990-09-19	0.1		1982-08-03	0.01
1990-09-20	0.1		1982-08-06	0.01
1990-09-23	19		1982-08-10	0.01
1990-09-23	0.1		1982-08-10	0.01
1990-09-26	1		1982-08-10	0.2
1991-04-04	0.4		1982-08-10	0.3
1991-04-18	0.3		1982-08-12	0
1991-04-21	0.1		1982-08-13	0.3
1991-07-24	0.1		1982-08-18	0.2
1991-07-24	0.2		1982-08-21	0.1
1991-07-24	0.1		1982-08-23	0.2
1991-07-24	0.1		1982-08-24	0.01
1991-07-26	0.1		1982-08-24	0.1
1991-08-01	0.1		1982-08-25	0.01
1991-08-02	0.1		1982-08-25	0.8
1991-08-02	0.1		1982-08-28	0.01
1991-08-05	0.1		1982-08-28	0.2
1991-08-05	0.1		1982-08-28	0.2
1991-08-05	0.1		1982-09-04	0.2
1991-08-06	0.1		1982-09-07	0.01
1991-08-07	0.1		1982-09-07	1
1991-08-07	0.1		1982-09-17	2
1991-08-10	0.1		1982-09-26	0.1
1991-08-10	0.1		1983-03-19	4
1991-08-11	0.1		1983-03-20	2.5
1991-08-11	0.3		1983-03-22	0.01
1991-08-11	756		1983-03-25	0.01
1991-08-11	8		1983-03-25	40
1991-08-12	0.1		1983-03-26	0.01
1991-08-12	0.1		1983-04-06	0.01
1991-08-13	0.1		1983-04-11	0.01
1991-08-14	0.1		1983-04-16	34
1991-08-15	0.1		1983-04-22	2
1991-08-16	0.1		1983-04-23	2.5
1991-08-20	5		1983-05-04	0.2
1991-08-20	0.5		1983-05-13	9
1991-08-23	0.1		1983-05-25	3
1991-08-23	0.1		1983-05-26	0.01
1991-08-23	0.1		1983-05-28	1
1991-08-23	0.1		1983-05-29	110
1991-08-23	0.1		1983-05-31	0.2
1991-08-26	0.1		1983-06-04	0.1
1991-08-27	76		1983-06-04	0.2
1991-08-28	0.1		1983-06-08	0.5
1991-08-30	3		1983-06-12	0.01
1991-09-02	0.1		1983-06-21	0.01
1991-09-15	0.1		1983-06-23	0.01
1991-09-15	320		1983-07-04	0.3
1991-09-15	0.1		1983-07-05	0.01
1991-09-16	0.1		1983-07-05	0.01
1991-09-17	234		1983-07-08	0.01
1991-09-21	1		1983-07-08	0.01
1991-09-25	0.3		1983-07-09	0.01
1991-09-27	0.3		1983-07-09	0.01
1991-09-28	0.8		1983-07-17	0.01
1991-09-28	0.1		1983-07-17	0.01
1991-09-28	84		1983-07-17	0.01
1991-10-05	0.1		1983-07-18	0.01
1991-10-11	0.1		1983-07-19	0.01
1991-10-12	2.5		1983-07-20	0.01
1991-10-14	4		1983-07-21	0.01
1991-10-16	10		1983-07-24	0.01
1991-10-19	0.1		1983-07-24	0.01
1992-04-01	0.5		1983-07-25	0.01
1992-04-01	4		1983-07-25	0.1
1992-04-09	0.1		1983-07-27	0.01
1992-04-09	0.1		1983-07-29	0.01
1992-04-14	2		1983-07-30	0.01
1992-05-08	0.2		1983-07-30	0.5
1992-06-07	0.2		1983-08-02	0.01
1992-06-07	0.1		1983-08-03	0.2
1992-06-09	0.1		1983-08-05	0.2
1992-06-12	0.1		1983-08-06	0.01
1992-06-19	0.1		1983-08-06	0.2
1992-06-25	0.1		1983-08-07	0.3
1992-06-26	0.1		1983-08-08	0.01
1992-06-26	0.1		1983-08-08	0.2
1992-06-27	0.1		1983-08-09	0.1
1992-06-28	0.1		1983-08-10	0.01
1992-07-22	0.1		1983-08-10	1.5
1992-07-31	0.1		1983-08-12	0.5
1992-07-31	0.1		1983-08-15	0.01
1992-08-03	0.1		1983-08-15	0.01
1992-08-11	0.1		1983-08-15	0.2
1992-08-12	0.1		1983-08-16	0.01
1992-08-14	0.6		1983-08-17	4
1992-08-15	0.1		1983-08-20	0.01
1992-08-16	0.1		1983-08-21	0.01
1992-08-17	0.8		1983-08-21	0.01
1992-08-17	270		1983-08-23	0.01
1992-08-17	0.1		1983-08-23	0.01
1992-08-17	0.2		1983-08-28	0.01
1992-08-17	90		1983-08-31	0.01
1992-08-17	0.3		1983-08-31	0.01
1992-08-18	1		1983-09-01	0.01
1992-08-18	0.1		1983-09-06	0.1
1992-08-21	0.1		1983-09-07	0.01
1992-08-28	0.1		1984-04-04	0.01
1992-08-31	0.1		1984-04-15	3
1992-09-02	0.7		1984-04-16	0.01
1992-09-08	0.3		1984-04-16	1
1992-09-10	0.1		1984-04-16	1
1993-06-24	0.1		1984-06-13	0.01
1993-06-27	0.1		1984-06-15	0.01
1993-07-04	0.1		1984-06-17	0.01
1993-07-17	0.1		1984-06-17	1
1993-07-19	0.1		1984-06-18	0.2
1993-07-25	0.1		1984-06-28	0.01
1993-07-31	0.1		1984-06-28	0.01
1993-08-01	0.1		1984-07-01	0.01
1993-08-01	0.1		1984-07-05	0.01
1993-08-07	0.1		1984-07-05	0.01
1993-08-11	0.1		1984-07-05	0.01
1993-08-12	0.1		1984-07-06	0.01
1993-08-18	0.1		1984-07-06	2
1993-08-26	0.1		1984-07-08	0.01
1994-04-18	0.1		1984-07-09	0.01
1994-06-01	1		1984-07-09	0.2
1994-06-23	0.1		1984-07-10	0.3
1994-06-26	0.1		1984-07-11	0.01
1994-07-09	0.1		1984-07-11	0.01
1994-07-09	0.1		1984-07-12	0.01
1994-07-10	0.1		1984-07-13	0.1
1994-07-11	0.1		1984-07-14	0.01
1994-07-12	0.4		1984-07-14	0.1
1994-07-12	0.4		1984-07-14	0.3
1994-07-13	0.1		1984-07-15	0.1
1994-07-13	0.1		1984-07-16	0.1
1994-07-14	0.1		1984-07-18	0.01
1994-07-14	0.1		1984-07-18	0.3
1994-07-15	0.1		1984-07-19	0.01
1994-07-15	0.1		1984-07-20	0.01
1994-07-15	0.2		1984-07-20	0.01
1994-07-15	0.3		1984-07-20	0.01
1994-07-16	0.1		1984-07-20	0.01
1994-07-16	20		1984-07-20	0.1
1994-07-16	0.1		1984-07-21	0.1
1994-07-16	2		1984-07-21	0.2
1994-07-17	0.1		1984-07-21	0.5
1994-07-20	0.1		1984-07-21	3.3
1994-07-21	0.1		1984-07-22	0.01
1994-07-22	0.1		1984-07-22	0.1
1994-07-23	0.1		1984-07-23	0.01
1994-07-23	0.5		1984-07-25	2.5
1994-07-24	0.1		1984-07-25	56
1994-07-24	2		1984-07-26	0.01
1994-07-24	0.1		1984-07-26	0.1
1994-07-24	0.1		1984-07-26	0.1
1994-07-24	0.1		1984-07-26	0.1
1994-07-24	0.1		1984-07-26	1.6
1994-07-24	0.1		1984-07-27	0.01
1994-07-24	0.1		1984-07-27	0.01
1994-07-24	0.1		1984-07-27	0.01
1994-07-24	0.1		1984-07-28	0.01
1994-07-24	0.5		1984-07-28	0.1
1994-07-25	1.5		1984-07-29	0.01
1994-07-25	0.1		1984-07-29	0.01
1994-07-26	0.1		1984-07-29	0.3
1994-07-26	2		1984-07-30	0.1
1994-07-26	0.1		1984-07-31	0.01
1994-07-26	0.1		1984-08-02	0.01
1994-07-26	1.5		1984-08-02	0.1
1994-07-26	0.1		1984-08-03	0.01
1994-07-26	0.1		1984-08-03	0.01
1994-07-26	0.1		1984-08-03	0.1
1994-07-26	0.1		1984-08-03	0.8
1994-07-26	0.1		1984-08-04	0.01
1994-07-28	2		1984-08-04	0.01
1994-07-28	0.1		1984-08-05	0.01
1994-07-29	0.1		1984-08-05	0.01
1994-07-30	0.1		1984-08-05	0.01
1994-08-02	0.1		1984-08-06	0.01
1994-08-02	0.1		1984-08-06	0.01
1994-08-02	0.2		1984-08-06	0.01
1994-08-02	0.5		1984-08-06	0.1
1994-08-03	0.5		1984-08-07	0.01
1994-08-03	0.2		1984-08-07	0.01
1994-08-03	0.1		1984-08-07	0.01
1994-08-03	0.1		1984-08-07	1.4
1994-08-03	1564		1984-08-07	2.7
1994-08-03	0.5		1984-08-08	0.01
1994-08-03	3507		1984-08-08	0.2
1994-08-04	1		1984-08-09	0.1
1994-08-05	0.5		1984-08-10	0.01
1994-08-05	0.3		1984-08-10	0.01
1994-08-05	0.3		1984-08-10	0.1
1994-08-05	0.1		1984-08-10	0.2
1994-08-05	0.3		1984-08-11	0.01
1994-08-05	0.3		1984-08-11	0.2
1994-08-05	0.1		1984-08-12	0.01
1994-08-06	0.3		1984-08-12	0.1
1994-08-06	0.1		1984-08-12	0.1
1994-08-09	278		1984-08-12	0.1
1994-08-09	0.1		1984-08-12	0.1
1994-08-09	0.2		1984-08-12	0.2
1994-08-11	0.1		1984-08-13	0.01
1994-08-11	3		1984-08-13	0.1
1994-08-11	0.1		1984-08-13	0.1
1994-08-11	0.5		1984-08-13	0.1
1994-08-11	0.1		1984-08-13	0.1
1994-08-11	0.1		1984-08-13	1.5
1994-08-11	750		1984-08-14	0.01
1994-08-12	1.5		1984-08-14	0.2
1994-08-12	0.1		1984-08-15	0.01
1994-08-12	0.2		1984-08-15	0.01
1994-08-12	0.1		1984-08-15	0.1
1994-08-12	0.3		1984-08-15	0.5
1994-08-12	0.3		1984-08-15	12061.7
1994-08-13	0.1		1984-08-16	0.1
1994-08-14	0.3		1984-08-16	0.2
1994-08-14	4		1984-08-17	0.01
1994-08-14	3		1984-08-17	0.1
1994-08-14	10610		1984-08-18	0.01
1994-08-15	0.3		1984-08-18	0.01
1994-08-15	35		1984-08-18	0.01
1994-08-15	0.3		1984-08-18	0.01
1994-08-15	80		1984-08-18	0.01
1994-08-15	0.1		1984-08-19	0.01
1994-08-15	0.1		1984-08-20	0.01
1994-08-15	8497		1984-08-20	0.1
1994-08-15	1237		1984-08-21	0.1
1994-08-15	46		1984-08-21	0.2
1994-08-15	45		1984-08-21	0.3
1994-08-15	0.2		1984-08-22	0.01
1994-08-17	0.1		1984-08-22	0.1
1994-08-19	0.1		1984-08-23	0.01
1994-08-28	0.1		1984-08-24	0.01
1994-08-28	0.5		1984-08-24	1.9
1994-08-29	0.1		1984-08-25	0.01
1994-09-01	0.1		1984-08-26	0.01
1994-09-03	0.1		1984-08-26	0.01
1994-09-05	0.1		1984-08-26	0.1
1994-09-10	46		1984-08-26	0.11
1994-09-11	0.1		1984-08-26	0.2
1994-09-12	0.1		1984-08-27	0.01
1994-09-15	0.1		1984-08-27	0.01
1994-09-15	3		1984-08-27	0.01
1994-09-15	0.1		1984-08-27	0.01
1994-09-17	0.1		1984-08-27	0.5
1994-09-19	85		1984-08-27	934
1994-09-21	0.1		1984-08-28	0.1
1994-09-22	0.2		1984-08-29	0.3
1994-09-25	0.8		1984-08-30	0.01
1994-10-10	0.1		1984-09-03	0.01
1994-10-15	0.2		1984-09-16	0.3
1995-04-18	0.3		1984-10-01	0.2
1995-05-27	3		1985-04-04	0.1
1995-05-28	0.1		1985-04-06	3
1995-05-29	0.1		1985-04-10	3
1995-07-06	0.1		1985-04-11	0.1
1995-07-06	0.1		1985-04-29	0.1
1995-07-28	0.1		1985-04-29	4
1995-07-28	0.4		1985-05-15	0.01
1995-07-28	0.2		1985-05-15	0.01
1995-07-30	0.1		1985-05-15	0.5
1995-08-23	0.1		1985-05-16	1
1995-09-09	0.1		1985-05-17	0.3
1995-09-24	0.1		1985-05-18	0.01
1995-10-04	0.1		1985-05-18	0.2
1996-05-17	0.2		1985-05-18	0.3
1996-05-17	0.1		1985-05-18	15
1996-06-15	0.1		1985-05-23	1
1996-07-03	8		1985-05-23	20
1996-07-13	0.3		1985-05-24	0.1
1996-07-17	41		1985-05-24	0.11
1996-07-18	35		1985-05-24	0.2
1996-07-24	50		1985-05-24	0.5
1996-07-28	0.1		1985-05-24	0.7
1996-08-01	0.1		1985-05-25	0.01
1996-08-01	0.1		1985-05-25	0.1
1996-08-11	0.1		1985-05-25	0.1
1996-08-13	0.1		1985-05-25	0.21
1996-08-14	0.1		1985-05-25	0.5
1996-08-15	30		1985-05-26	0.5
1996-08-18	0.1		1985-06-01	4
1996-08-20	0.3		1985-06-11	0.3
1996-08-25	0.1		1985-06-13	0.2
1996-08-26	0.1		1985-06-20	0.01
1996-08-30	0.3		1985-06-20	0.1
1996-09-03	0.1		1985-06-20	1
1996-09-13	0.1		1985-06-21	0.1
1996-09-13	0.1		1985-06-22	0.1
1996-09-16	0.1		1985-06-22	4
1996-09-23	50		1985-06-23	0.1
1996-10-03	7.2		1985-06-24	0.01
1997-06-27	0.1		1985-06-24	0.01
1997-07-29	0.1		1985-06-24	2
1997-07-30	0.1		1985-06-27	0.01
1997-07-31	85		1985-06-27	0.1
1997-08-01	3		1985-06-28	0.1
1997-08-03	0.1		1985-06-29	0.01
1997-08-06	0.2		1985-06-30	0.01
1997-08-06	0.3		1985-06-30	0.01
1997-08-07	0.1		1985-07-01	0.5
1997-08-07	0.1		1985-07-02	0.8
1997-08-07	0.7		1985-07-03	0.01
1997-08-07	0.1		1985-07-03	0.01
1997-08-07	0.2		1985-07-03	0.21
1997-08-07	0.1		1985-07-04	0.01
1997-08-12	0.1		1985-07-04	0.1
1997-08-15	0.1		1985-07-05	0.01
1997-08-15	0.2		1985-07-05	0.01
1997-08-18	0.2		1985-07-05	0.1
1997-08-19	0.1		1985-07-06	0.01
1997-08-19	0.1		1985-07-06	0.01
1997-08-20	0.1		1985-07-07	0.2
1997-09-14	0.2		1985-07-08	0.01
1997-09-14	0.2		1985-07-09	0.2
1998-05-02	0.1		1985-07-09	0.3
1998-05-16	0.2		1985-07-10	0.01
1998-07-10	0.1		1985-07-11	0.1
1998-07-18	0.1		1985-07-12	0.01
1998-07-18	0.1		1985-07-13	0.01
1998-07-23	0.3		1985-07-14	1
1998-07-27	0.1		1985-07-15	0.01
1998-07-28	0.1		1985-07-15	0.1
1998-07-28	0.3		1985-07-16	0.01
1998-07-28	0.1		1985-07-16	0.01
1998-07-30	0.5		1985-07-16	0.1
1998-08-03	0.1		1985-07-18	0.1
1998-08-04	0.1		1985-07-18	0.1
1998-08-06	1		1985-07-23	0.01
1998-08-07	210		1985-07-23	0.01
1998-08-07	0.1		1985-07-23	0.1
1998-08-07	3070		1985-07-23	0.1
1998-08-09	0.3		1985-07-25	0.01
1998-08-10	0.1		1985-07-25	0.01
1998-08-16	0.1		1985-07-26	0.2
1998-08-19	0.1		1985-07-26	3.3
1998-08-19	0.3		1985-07-26	28.5
1998-08-20	0.1		1985-07-28	0.01
1998-08-20	0.1		1985-07-29	0.01
1998-08-20	1		1985-07-30	0.1
1998-08-20	20		1985-07-30	0.2
1998-08-20	0.1		1985-08-01	0.01
1998-08-20	165.3		1985-08-01	0.01
1998-08-20	658		1985-08-01	0.01
1998-08-20	0.3		1985-08-01	0.1
1998-08-20	0.3		1985-08-02	0.01
1998-08-20	8800		1985-08-02	0.01
1998-08-20	0.3		1985-08-02	0.01
1998-08-20	0.2		1985-08-02	0.1
1998-08-20	0.2		1985-08-03	1
1998-08-20	0.1		1985-08-05	0.11
1998-08-20	0.2		1985-08-06	0.01
1998-08-20	0.3		1985-08-06	0.01
1998-08-20	0.1		1985-08-08	0.01
1998-08-20	0.3		1985-08-08	0.1
1998-08-20	0.1		1985-08-16	0.01
1998-08-20	1		1985-08-18	0.5
1998-08-20	0.2		1985-08-21	0.01
1998-08-20	0.4		1985-08-22	0.1
1998-08-21	0.1		1985-08-25	0.01
1998-08-21	0.1		1985-08-26	0.01
1998-08-21	0.1		1985-08-26	0.1
1998-08-21	0.1		1985-08-26	0.3
1998-08-21	0.1		1985-08-26	0.8
1998-08-21	0.1		1985-08-27	0.01
1998-08-21	0.1		1985-08-27	0.01
1998-08-21	0.3		1985-08-27	0.01
1998-08-21	0.1		1985-08-27	0.01
1998-08-23	0.2		1985-08-28	0.01
1998-08-23	0.1		1985-08-28	0.01
1998-08-23	0.1		1985-08-28	0.01
1998-08-27	4		1985-08-28	0.01
1998-08-28	0.1		1985-08-28	0.01
1998-08-28	7.7		1985-08-28	0.01
1998-08-31	0.1		1985-08-28	0.01
1998-09-01	0.1		1985-08-28	0.01
1998-09-01	0.1		1985-08-28	1.5
1998-09-04	59		1985-08-29	0.01
1998-09-06	0.1		1985-08-29	0.01
1998-09-09	0.2		1985-08-29	0.01
1998-09-10	0.1		1985-08-29	0.1
1998-09-12	55		1985-08-29	0.3
1998-09-17	3		1985-08-29	0.5
1998-09-17	0.1		1985-08-30	0.01
1998-09-17	0.1		1985-08-30	0.51
1998-09-17	0.5		1985-08-30	0.8
1998-09-17	0.1		1985-08-31	0.01
1998-09-17	0.3		1985-08-31	0.1
1998-09-17	0.1		1985-09-02	0.01
1998-09-17	0.1		1985-09-05	0.01
1998-09-17	0.1		1985-09-11	0.01
1998-09-17	0.1		1985-09-11	0.01
1998-09-17	0.1		1986-04-06	0.2
1998-09-17	0.1		1986-04-07	4
1998-09-17	0.1		1986-04-24	0.2
1998-09-18	0.1		1986-04-26	0.2
1998-09-18	0.1		1986-05-12	0.01
1998-09-19	0.8		1986-05-24	0.01
1998-09-23	0.3		1986-05-24	0.01
1998-10-18	0.1		1986-05-28	0.01
1999-04-01	0.1		1986-05-30	0.01
1999-06-07	0.2		1986-06-01	3
1999-06-28	0.1		1986-06-02	0.01
1999-06-29	0.1		1986-06-03	0.01
1999-07-02	0.1		1986-06-03	0.01
1999-07-05	0.1		1986-06-03	0.01
1999-07-05	0.1		1986-06-05	0.01
1999-07-10	0.1		1986-06-05	0.01
1999-07-10	0.1		1986-06-05	0.01
1999-07-12	0.1		1986-06-07	0.01
1999-07-13	0.1		1986-06-14	0.01
1999-07-17	88		1986-06-17	0.01
1999-07-18	0.4		1986-06-18	0.01
1999-07-21	0.1		1986-06-18	0.01
1999-07-21	0.1		1986-06-18	0.01
1999-07-23	0.1		1986-06-18	0.01
1999-07-23	0.1		1986-06-18	0.01
1999-07-25	0.1		1986-06-20	1
1999-07-28	0.1		1986-06-21	0.01
1999-07-28	0.3		1986-06-21	0.01
1999-07-28	0.2		1986-06-22	0.01
1999-07-29	0.1		1986-06-22	0.01
1999-07-29	34		1986-06-24	0.01
1999-07-30	0.1		1986-06-24	0.01
1999-07-30	0.1		1986-06-25	0.01
1999-07-30	0.1		1986-06-26	0.01
1999-07-30	0.8		1986-06-27	0.01
1999-07-30	0.1		1986-06-28	0.01
1999-07-30	0.2		1986-06-28	0.01
1999-07-30	0.1		1986-06-28	0.01
1999-07-30	0.1		1986-06-29	0.01
1999-07-30	0.1		1986-06-29	0.01
1999-07-30	0.1		1986-06-30	0.01
1999-07-30	0.5		1986-06-30	0.01
1999-07-30	0.1		1986-07-01	0.01
1999-08-01	0.4		1986-07-01	0.01
1999-08-01	0.3		1986-07-02	0.01
1999-08-02	0.1		1986-07-03	0.01
1999-08-02	0.1		1986-07-04	0.01
1999-08-03	0.2		1986-07-05	0.01
1999-08-03	0.1		1986-07-06	0.01
1999-08-03	0.2		1986-07-06	0.01
1999-08-04	0.1		1986-07-07	0.01
1999-08-04	0.1		1986-07-08	0.01
1999-08-06	0.1		1986-07-08	1
1999-08-06	0.1		1986-07-09	0.01
1999-08-06	0.2		1986-07-09	0.01
1999-08-07	0.1		1986-07-09	0.01
1999-08-07	0.1		1986-07-10	0.01
1999-08-07	0.1		1986-07-14	0.01
1999-08-07	0.1		1986-07-20	0.01
1999-08-08	0.1		1986-07-21	0.01
1999-08-08	0.1		1986-07-22	0.01
1999-08-08	0.3		1986-07-22	0.01
1999-08-15	0.1		1986-07-22	0.01
1999-08-15	0.1		1986-07-22	0.01
1999-08-21	0.3		1986-07-22	0.01
1999-08-22	0.1		1986-07-22	0.01
1999-08-23	0.1		1986-07-22	0.01
1999-08-24	0.1		1986-07-22	0.01
1999-08-25	0.1		1986-07-22	0.01
1999-08-25	0.1		1986-07-22	0.01
1999-08-27	0.1		1986-07-22	0.01
1999-08-27	0.1		1986-07-22	0.01
1999-08-27	0.1		1986-07-22	0.01
1999-08-27	80		1986-07-22	0.01
1999-08-27	26		1986-07-22	0.01
1999-08-27	2		1986-07-22	0.01
1999-08-27	0.1		1986-07-22	0.01
1999-08-27	0.3		1986-07-23	0.01
1999-08-27	0.3		1986-07-23	0.01
1999-08-27	0.3		1986-07-23	0.01
1999-08-27	0.1		1986-07-23	0.01
1999-08-27	0.1		1986-07-24	0.01
1999-08-27	0.1		1986-07-24	1
1999-08-27	0.1		1986-07-24	3
1999-08-27	0.1		1986-07-26	0.01
1999-08-27	0.3		1986-07-28	3
1999-08-27	0.3		1986-07-30	0.01
1999-08-27	0.8		1986-07-30	0.01
1999-08-27	0.1		1986-07-30	1
1999-08-28	2		1986-07-31	0.01
1999-08-28	2		1986-07-31	0.01
1999-08-28	0.1		1986-08-01	0.01
1999-08-28	345		1986-08-01	0.01
1999-08-28	0.5		1986-08-02	0.01
1999-08-28	5		1986-08-02	0.01
1999-08-28	0.1		1986-08-02	1
1999-08-28	8		1986-08-03	0.01
1999-08-30	0.1		1986-08-04	0.01
1999-08-30	0.1		1986-08-05	0.01
1999-09-04	0.1		1986-08-06	1
1999-09-04	0.8		1986-08-09	0.01
1999-09-13	5		1986-08-09	0.01
1999-09-17	38		1986-08-09	0.01
1999-09-17	747		1986-08-09	1
1999-09-18	0.4		1986-08-10	0.01
1999-09-18	0.1		1986-08-10	0.01
1999-09-21	0.1		1986-08-10	0.01
1999-09-23	4		1986-08-11	0.01
2000-06-14	0.1		1986-08-11	0.01
2000-07-03	0.1		1986-08-11	0.01
2000-07-03	0.1		1986-08-11	0.01
2000-07-08	0.1		1986-08-11	0.01
2000-07-08	2		1986-08-11	0.01
2000-07-10	0.1		1986-08-11	0.01
2000-07-13	0.1		1986-08-11	0.01
2000-07-15	1		1986-08-11	0.01
2000-07-15	0.1		1986-08-11	0.01
2000-07-15	1		1986-08-11	0.01
2000-07-19	0.1		1986-08-11	5
2000-07-22	0.1		1986-08-13	0.01
2000-07-22	1		1986-08-14	0.01
2000-07-22	0.5		1986-08-15	0.01
2000-07-22	0.3		1986-08-15	0.01
2000-07-22	1.5		1986-08-15	0.01
2000-07-22	0.1		1986-08-15	0.01
2000-07-22	1.1		1986-08-16	0.01
2000-07-22	0.2		1986-08-16	0.01
2000-07-22	0.1		1986-08-16	0.01
2000-07-23	1645		1986-08-17	0.01
2000-07-23	10		1986-08-17	0.01
2000-07-26	30		1986-08-18	0.01
2000-07-28	0.1		1986-08-18	0.01
2000-07-28	0.1		1986-08-19	0.01
2000-07-30	0.3		1986-08-19	0.01
2000-07-30	0.1		1986-08-22	0.01
2000-07-31	0.1		1986-08-22	0.01
2000-07-31	0.1		1986-08-22	0.01
2000-07-31	0.1		1986-08-22	3
2000-07-31	0.1		1986-08-25	0.01
2000-08-03	0.5		1986-08-25	0.01
2000-08-03	0.3		1986-08-28	0.01
2000-08-04	30		1986-08-28	0.01
2000-08-04	20		1986-08-29	0.01
2000-08-04	619		1986-08-29	0.01
2000-08-04	60		1986-08-29	0.01
2000-08-04	0.3		1986-08-30	0.01
2000-08-04	0.3		1986-08-30	0.01
2000-08-04	0.1		1986-08-30	0.01
2000-08-04	1		1986-08-30	0.01
2000-08-04	5		1986-08-30	0.01
2000-08-04	4		1986-08-30	0.01
2000-08-04	0.1		1986-08-30	0.01
2000-08-04	0.1		1986-08-30	1
2000-08-06	0.1		1986-08-30	1
2000-08-07	0.2		1986-08-31	0.01
2000-08-07	1		1986-09-01	0.01
2000-08-10	0.8		1986-09-04	0.01
2000-08-10	4.5		1986-09-04	1
2000-08-10	0.1		1986-09-08	0.01
2000-08-10	0.8		1986-09-09	0.01
2000-08-10	0.3		1986-09-09	0.01
2000-08-10	4.5		1986-09-13	0.01
2000-08-10	0.2		1986-09-15	0.01
2000-08-10	0.1		1986-09-16	0.01
2000-08-10	1.1		1986-09-17	2
2000-08-10	0.8		1986-09-26	2
2000-08-10	0.1		1986-10-16	0.01
2000-08-10	0.1		1986-10-23	0.01
2000-08-10	0.1		1987-04-01	1.5
2000-08-10	0.1		1987-04-01	2
2000-08-10	0.1		1987-04-01	2.5
2000-08-10	34		1987-04-04	0.2
2000-08-10	0.1		1987-04-07	2
2000-08-10	0.3		1987-04-09	1
2000-08-10	0.1		1987-04-15	0.01
2000-08-10	0.1		1987-04-25	0.1
2000-08-10	0.1		1987-04-26	0.01
2000-08-10	0.1		1987-04-28	0.01
2000-08-10	0.1		1987-04-28	0.3
2000-08-10	0.1		1987-04-30	0.01
2000-08-11	0.5		1987-04-30	0.5
2000-08-11	3130		1987-05-07	2
2000-08-11	410		1987-05-08	0.1
2000-08-13	0.4		1987-05-08	2.2
2000-08-13	0.5		1987-05-10	19
2000-08-14	1		1987-05-13	0.2
2000-08-14	0.1		1987-05-13	0.3
2000-08-18	0.3		1987-05-13	0.4
2000-08-23	0.1		1987-05-13	3
2000-08-24	0.2		1987-05-14	0.1
2000-08-24	0.1		1987-05-24	0.1
2000-08-25	0.1		1987-05-25	0.01
2000-08-25	0.1		1987-06-03	1
2000-08-25	1		1987-06-05	0.01
2000-08-25	0.1		1987-06-06	0.01
2000-08-25	0.1		1987-06-06	0.3
2000-08-25	0.3		1987-06-07	1
2000-08-26	210		1987-06-08	1.5
2000-08-27	0.1		1987-06-13	2.5
2000-08-27	0.1		1987-06-14	0.01
2000-08-31	0.1		1987-06-14	0.1
2000-09-06	2.5		1987-06-14	0.3
2000-09-08	0.1		1987-06-14	0.3
2000-09-16	20		1987-06-14	0.5
2000-09-16	0.1		1987-06-14	1
2000-09-16	0.1		1987-06-15	0.01
2000-09-16	0.5		1987-06-15	0.01
2000-09-16	0.1		1987-06-15	0.01
2000-09-16	0.1		1987-06-15	0.01
2000-09-16	0.1		1987-06-15	0.1
2000-11-15	0.1		1987-06-15	0.1
			1987-06-15	0.1
			1987-06-15	0.3
			1987-06-16	0.01
			1987-06-16	0.01
			1987-06-16	0.01
			1987-06-16	0.01
			1987-06-16	0.2
			1987-06-17	0.01
			1987-06-17	0.01
			1987-06-17	0.1
			1987-06-17	0.4
			1987-06-22	0.01
			1987-06-25	0.01
			1987-06-25	1
			1987-06-26	3.3
			1987-06-26	5
			1987-06-27	0.01
			1987-06-27	0.01
			1987-06-28	0.01
			1987-06-28	0.1
			1987-06-29	0.5
			1987-06-30	0.1
			1987-07-01	0.1
			1987-07-01	1
			1987-07-01	1
			1987-07-01	2.5
			1987-07-02	0.5
			1987-07-03	0.01
			1987-07-04	0.01
			1987-07-04	0.01
			1987-07-04	0.1
			1987-07-04	0.1
			1987-07-08	0.01
			1987-07-08	0.1
			1987-07-08	0.7
			1987-07-14	0.5
			1987-07-15	0.01
			1987-07-15	1705
			1987-07-16	0.01
			1987-07-16	0.01
			1987-07-16	0.2
			1987-07-16	0.3
			1987-07-17	0.1
			1987-07-17	0.1
			1987-07-21	0.01
			1987-07-21	0.01
			1987-07-25	0.01
			1987-07-26	0.1
			1987-07-27	0.01
			1987-07-30	0.01
			1987-07-30	0.01
			1987-07-30	0.01
			1987-08-01	0.01
			1987-08-01	0.01
			1987-08-02	0.01
			1987-08-02	0.1
			1987-08-02	0.7
			1987-08-04	0.1
			1987-08-06	0.01
			1987-08-08	0.01
			1987-08-09	0.01
			1987-08-09	0.01
			1987-08-11	0.01
			1987-08-11	0.01
			1987-08-13	0.11
			1987-08-20	0.5
			1987-08-22	0.01
			1987-08-23	0.01
			1987-08-23	0.01
			1987-08-23	0.01
			1987-08-25	0.01
			1987-08-30	0.01
			1987-08-30	0.01
			1987-08-31	0.01
			1987-09-02	0.01
			1987-09-02	0.1
			1987-09-02	2.5
			1987-09-08	0.2
			1987-09-11	0.01
			1987-09-12	0.01
			1987-09-12	0.1
			1987-09-20	0.01
			1987-09-20	0.01
			1987-09-20	0.5
			1987-09-22	1.5
			1987-09-23	0.41
			1987-10-02	0.01
			1987-10-04	0.01
			1987-10-05	0.5
			1987-10-10	0.3
			1987-10-10	0.5
			1987-10-13	0.01
			1987-10-15	0.01
			1987-10-18	18
			1987-10-27	0.01
			1987-10-27	0.2
			1987-10-28	0.1
			1987-10-28	0.2
			1987-10-29	1
			1987-11-04	0.5
			1987-11-10	0.01
			1987-11-15	0.01
			1987-11-29	0.01
			1988-02-25	0.01
			1988-03-05	4
			1988-03-07	0.1
			1988-03-07	0.5
			1988-03-07	2
			1988-03-16	0.1
			1988-03-16	30
			1988-03-17	0.1
			1988-03-19	0.1
			1988-03-19	0.2
			1988-03-19	0.4
			1988-03-19	0.6
			1988-03-19	1.6
			1988-03-20	0.1
			1988-03-20	0.5
			1988-03-23	0.01
			1988-03-27	0.2
			1988-03-28	4
			1988-04-06	0.4
			1988-04-09	12
			1988-04-10	0.1
			1988-04-10	0.1
			1988-04-11	0.5
			1988-04-11	2
			1988-04-11	2
			1988-04-11	120
			1988-04-12	0.5
			1988-04-12	0.7
			1988-04-13	0.5
			1988-04-14	3.5
			1988-04-15	0.01
			1988-04-15	0.3
			1988-04-15	4
			1988-04-16	0.3
			1988-04-16	2
			1988-05-03	0.1
			1988-05-11	0.01
			1988-05-21	1.5
			1988-05-21	17
			1988-05-22	15.5
			1988-06-03	0.1
			1988-06-05	0.01
			1988-06-05	0.01
			1988-06-06	0.01
			1988-06-15	0.1
			1988-06-16	0.01
			1988-06-16	0.01
			1988-06-16	1
			1988-06-17	0.01
			1988-06-17	0.01
			1988-06-17	0.01
			1988-06-17	0.01
			1988-06-17	0.01
			1988-06-17	0.1
			1988-06-19	0.1
			1988-06-20	0.1
			1988-06-23	0.01
			1988-06-23	0.01
			1988-06-23	0.1
			1988-06-23	0.1
			1988-06-23	0.2
			1988-06-24	0.01
			1988-06-24	0.1
			1988-06-24	0.3
			1988-06-25	0.01
			1988-06-25	0.01
			1988-06-25	0.1
			1988-06-25	0.3
			1988-06-25	1.2
			1988-06-26	0.01
			1988-06-27	0.01
			1988-06-27	0.1
			1988-06-28	0.01
			1988-06-28	0.01
			1988-06-29	0.2
			1988-07-01	0.01
			1988-07-01	0.1
			1988-07-03	0.01
			1988-07-04	0.01
			1988-07-04	0.01
			1988-07-04	0.01
			1988-07-05	0.1
			1988-07-08	0.1
			1988-07-09	0.01
			1988-07-09	0.3
			1988-07-10	0.1
			1988-07-11	0.01
			1988-07-12	0.5
			1988-07-13	0.5
			1988-07-15	0.01
			1988-07-16	0.01
			1988-07-20	0.01
			1988-07-21	0.1
			1988-07-22	0.01
			1988-07-22	0.01
			1988-07-23	0.01
			1988-07-23	0.8
			1988-07-25	0.01
			1988-07-25	1.5
			1988-07-25	2
			1988-07-26	0.01
			1988-07-26	0.1
			1988-07-27	0.01
			1988-07-28	0.2
			1988-07-29	0.01
			1988-07-30	0.2
			1988-07-30	0.3
			1988-07-30	1
			1988-07-31	0.01
			1988-08-01	0.01
			1988-08-01	0.01
			1988-08-01	0.2
			1988-08-02	0.01
			1988-08-02	0.1
			1988-08-03	0.01
			1988-08-03	0.1
			1988-08-04	0.01
			1988-08-05	0.01
			1988-08-07	0.01
			1988-08-08	0.01
			1988-08-10	0.01
			1988-08-10	0.1
			1988-08-11	0.01
			1988-08-11	0.01
			1988-08-11	0.01
			1988-08-11	0.3
			1988-08-12	0.01
			1988-08-12	0.01
			1988-08-12	0.1
			1988-08-13	0.01
			1988-08-13	0.01
			1988-08-13	0.01
			1988-08-13	0.01
			1988-08-13	0.01
			1988-08-13	0.1
			1988-08-14	0.01
			1988-08-14	0.01
			1988-08-14	0.01
			1988-08-14	0.1
			1988-08-14	0.6
			1988-08-15	0.01
			1988-08-15	0.1
			1988-08-15	0.1
			1988-08-15	0.2
			1988-08-16	0.01
			1988-08-16	0.11
			1988-08-16	0.3
			1988-08-17	0.01
			1988-08-17	0.01
			1988-08-17	0.01
			1988-08-17	0.01
			1988-08-17	0.01
			1988-08-17	0.01
			1988-08-17	0.1
			1988-08-17	0.1
			1988-08-17	0.1
			1988-08-17	0.2
			1988-08-17	0.2
			1988-08-17	0.2
			1988-08-17	0.4
			1988-08-17	0.4
			1988-08-17	1
			1988-08-17	52
			1988-08-18	0.01
			1988-08-18	0.01
			1988-08-18	0.01
			1988-08-18	0.01
			1988-08-18	0.01
			1988-08-18	0.01
			1988-08-18	0.1
			1988-08-18	4.5
			1988-08-21	0.01
			1988-08-23	0.01
			1988-08-23	0.1
			1988-08-23	1.5
			1988-08-24	0.01
			1988-08-24	0.01
			1988-08-25	0.5
			1988-08-25	0.5
			1988-08-25	1
			1988-08-25	13051
			1988-08-26	0.2
			1988-08-28	0.01
			1988-08-28	0.01
			1988-08-29	0.01
			1988-08-29	0.01
			1988-08-30	0.01
			1988-08-31	0.01
			1988-09-01	0.1
			1988-09-01	0.1
			1988-09-01	0.1
			1988-09-01	0.2
			1988-09-02	0.01
			1988-09-03	0.01
			1988-09-05	5
			1988-09-06	0.01
			1988-09-06	0.01
			1988-09-06	0.1
			1988-09-06	0.3
			1988-09-06	4.5
			1988-09-07	0.01
			1988-09-08	0.01
			1988-09-08	0.1
			1988-09-11	0.01
			1988-10-22	5
			1989-04-09	0.01
			1989-04-11	0.01
			1989-04-12	0.5
			1989-04-15	0.2
			1989-04-15	1.3
			1989-04-15	15
			1989-04-17	0.7
			1989-04-18	1
			1989-04-18	2
			1989-04-20	0.1
			1989-04-20	0.1
			1989-04-20	5
			1989-04-20	10
			1989-04-21	0.3
			1989-04-21	4.5
			1989-04-30	0.01
			1989-04-30	0.1
			1989-04-30	4.7
			1989-05-08	0.5
			1989-05-09	0.01
			1989-05-12	0
			1989-05-22	0.01
			1989-05-23	0.01
			1989-06-02	0.01
			1989-06-05	0.3
			1989-06-06	0.5
			1989-06-08	0.01
			1989-06-09	0.01
			1989-06-09	0.3
			1989-06-12	4.1
			1989-06-13	0.01
			1989-06-18	0.1
			1989-06-18	0.5
			1989-06-20	0.1
			1989-06-22	35
			1989-06-26	1
			1989-06-27	0.01
			1989-06-27	0.2
			1989-06-27	0.7
			1989-06-29	0.01
			1989-06-29	0.01
			1989-06-29	0.11
			1989-06-30	0.1
			1989-07-01	0.01
			1989-07-01	0.01
			1989-07-01	0.01
			1989-07-03	0.2
			1989-07-04	0.01
			1989-07-04	0.1
			1989-07-05	0.01
			1989-07-05	0.01
			1989-07-06	0.01
			1989-07-06	0.01
			1989-07-08	0.01
			1989-07-08	0.01
			1989-07-08	0.1
			1989-07-09	0.1
			1989-07-10	0.01
			1989-07-10	0.01
			1989-07-10	0.01
			1989-07-10	0.01
			1989-07-11	0.01
			1989-07-11	0.5
			1989-07-12	0.01
			1989-07-12	0.1
			1989-07-13	0.01
			1989-07-13	0.1
			1989-07-15	0.01
			1989-07-16	0.1
			1989-07-20	0.01
			1989-07-20	0.01
			1989-07-20	0.01
			1989-07-20	0.01
			1989-07-20	0.1
			1989-07-20	0.1
			1989-07-20	0.1
			1989-07-20	0.1
			1989-07-20	0.5
			1989-07-21	0.01
			1989-07-21	0.01
			1989-07-21	0.1
			1989-07-23	0.01
			1989-07-23	0.01
			1989-07-23	0.01
			1989-07-23	0.3
			1989-07-24	2
			1989-07-25	0.01
			1989-07-25	0.01
			1989-07-25	0.01
			1989-07-25	0.1
			1989-07-25	0.1
			1989-07-25	0.2
			1989-07-25	0.2
			1989-07-25	0.5
			1989-07-25	0.8
			1989-07-25	2
			1989-07-26	0.1
			1989-07-26	0.2
			1989-07-27	0.01
			1989-07-27	0.01
			1989-07-28	0.01
			1989-07-29	0.01
			1989-07-30	0.01
			1989-07-30	1.5
			1989-07-31	0.01
			1989-08-01	0.01
			1989-08-01	2
			1989-08-03	0.01
			1989-08-03	0.01
			1989-08-05	0.01
			1989-08-05	0.01
			1989-08-06	0.01
			1989-08-06	0.01
			1989-08-06	0.01
			1989-08-06	0.01
			1989-08-06	2
			1989-08-07	0.01
			1989-08-07	0.1
			1989-08-08	0.01
			1989-08-08	0.01
			1989-08-09	0.01
			1989-08-10	0.01
			1989-08-10	0.01
			1989-08-11	0.01
			1989-08-11	0.1
			1989-08-12	0.01
			1989-08-12	0.01
			1989-08-12	0.01
			1989-08-12	0.1
			1989-08-13	0.01
			1989-08-13	0.01
			1989-08-13	0.2
			1989-08-14	0.01
			1989-08-14	0.01
			1989-08-14	0.1
			1989-08-14	0.1
			1989-08-15	0.01
			1989-08-16	0.1
			1989-08-19	0.01
			1989-08-19	0.01
			1989-08-20	0.01
			1989-08-20	0.01
			1989-08-20	0.1
			1989-08-21	0.1
			1989-08-28	0.01
			1989-09-10	0.2
			1989-09-16	0.1
			1989-09-16	0.5
			1989-09-20	0.01
			1989-09-23	6
			1989-10-10	2
			1989-10-10	2
			1989-10-10	8
			1989-10-19	0.1
			1989-10-20	0.1
			1990-03-28	0.1
			1990-03-30	2
			1990-03-31	0.01
			1990-03-31	0.2
			1990-04-01	0.1
			1990-04-08	1
			1990-04-15	1.8
			1990-04-16	3
			1990-04-17	0.1
			1990-05-01	0.1
			1990-05-05	0.3
			1990-05-06	0.01
			1990-05-06	4
			1990-05-07	2.4
			1990-06-22	0.01
			1990-06-24	0.01
			1990-06-26	0.1
			1990-07-01	3
			1990-07-02	0.01
			1990-07-02	0.01
			1990-07-02	0.01
			1990-07-04	0.01
			1990-07-04	0.01
			1990-07-05	0.01
			1990-07-05	0.3
			1990-07-08	0.01
			1990-07-10	0.01
			1990-07-10	1
			1990-07-10	5
			1990-07-10	48
			1990-07-13	0.1
			1990-07-14	0.2
			1990-07-15	0.01
			1990-07-15	0.01
			1990-07-15	0.01
			1990-07-15	0.01
			1990-07-16	0.01
			1990-07-17	0.01
			1990-07-18	0.01
			1990-07-19	0.01
			1990-07-20	0.01
			1990-07-20	0.01
			1990-07-21	0.1
			1990-07-22	0.01
			1990-07-22	0.1
			1990-07-23	0.01
			1990-07-23	0.01
			1990-07-23	0.01
			1990-07-24	0.01
			1990-07-24	0.01
			1990-07-29	0.01
			1990-07-31	0.01
			1990-07-31	0.01
			1990-07-31	0.01
			1990-08-01	0.01
			1990-08-01	0.01
			1990-08-03	0.01
			1990-08-04	0.01
			1990-08-04	0.01
			1990-08-04	0.01
			1990-08-05	0.01
			1990-08-05	0.01
			1990-08-05	0.01
			1990-08-05	0.01
			1990-08-05	0.01
			1990-08-06	0.01
			1990-08-07	0.01
			1990-08-07	0.01
			1990-08-10	0.01
			1990-08-10	0.01
			1990-08-10	0.01
			1990-08-10	0.01
			1990-08-10	0.01
			1990-08-11	0.01
			1990-08-11	0.1
			1990-08-12	0.01
			1990-08-12	1
			1990-08-15	0.01
			1990-08-15	0.01
			1990-08-15	0.01
			1990-08-16	0.01
			1990-08-16	0.01
			1990-08-16	0.01
			1990-08-16	0.01
			1990-08-16	2
			1990-08-20	0.01
			1990-08-20	0.01
			1990-08-20	0.01
			1990-08-20	0.01
			1990-08-20	0.01
			1990-08-20	0.01
			1990-08-20	0.01
			1990-08-21	0.01
			1990-08-23	0.01
			1990-08-23	0.01
			1990-08-23	0.01
			1990-08-25	0.01
			1990-08-28	0.01
			1990-09-03	0.01
			1990-09-05	0.5
			1990-09-09	0.01
			1990-09-12	0.2
			1990-09-13	0.1
			1990-09-15	0.01
			1990-09-15	0.1
			1990-09-16	0.1
			1990-09-16	0.1
			1990-09-16	0.2
			1990-09-16	1
			1990-09-17	0.01
			1990-09-17	0.21
			1990-09-19	0.01
			1990-09-19	0.01
			1990-09-19	0.1
			1990-09-19	0.1
			1990-09-21	0.01
			1990-09-21	0.01
			1990-09-22	0.01
			1990-09-22	0.01
			1990-09-22	0.1
			1990-09-23	0.01
			1990-09-23	0.3
			1990-09-25	0.01
			1990-09-25	0.01
			1990-09-26	0.5
			1990-09-28	0.01
			1990-09-28	0.2
			1990-09-30	0.01
			1990-10-02	0.01
			1990-10-02	0.1
			1990-10-08	0.01
			1990-10-14	0.2
			1990-11-16	0.1
			1991-03-18	20
			1991-04-01	0.1
			1991-04-01	4
			1991-04-04	0.01
			1991-04-08	0.3
			1991-04-13	3
			1991-04-18	1.51
			1991-04-19	0.01
			1991-04-19	0.1
			1991-04-20	0.01
			1991-04-20	0.3
			1991-04-20	1.2
			1991-04-21	0.01
			1991-04-21	2.5
			1991-04-22	0.1
			1991-04-22	3
			1991-04-28	0.2
			1991-04-28	5
			1991-05-02	1
			1991-05-04	0.01
			1991-05-20	0.01
			1991-06-09	0.01
			1991-06-13	0.01
			1991-06-22	0.01
			1991-06-26	0.01
			1991-06-29	0.1
			1991-06-29	0.1
			1991-06-30	0.01
			1991-07-01	0.01
			1991-07-01	0.1
			1991-07-03	0.01
			1991-07-03	10
			1991-07-04	0.01
			1991-07-05	0.01
			1991-07-06	0.01
			1991-07-08	0.01
			1991-07-08	0.01
			1991-07-10	0.01
			1991-07-11	0.01
			1991-07-11	0.01
			1991-07-12	0.1
			1991-07-13	0.01
			1991-07-15	2
			1991-07-16	0.01
			1991-07-22	0.01
			1991-07-24	0.01
			1991-07-24	0.01
			1991-07-24	0.1
			1991-07-25	0.01
			1991-07-25	0.01
			1991-07-26	0.01
			1991-07-26	0.4
			1991-07-28	0.1
			1991-07-28	0.1
			1991-07-29	0.1
			1991-07-31	0.01
			1991-07-31	0.01
			1991-07-31	0.2
			1991-07-31	0.2
			1991-08-01	0.01
			1991-08-01	0.01
			1991-08-01	0.1
			1991-08-02	0.01
			1991-08-02	0.01
			1991-08-02	0.01
			1991-08-02	0.01
			1991-08-02	0.1
			1991-08-02	2
			1991-08-03	0.01
			1991-08-03	0.01
			1991-08-03	0.01
			1991-08-04	0.01
			1991-08-04	0.01
			1991-08-05	0.01
			1991-08-05	0.01
			1991-08-05	0.01
			1991-08-05	0.01
			1991-08-05	0.01
			1991-08-07	0.01
			1991-08-08	0.01
			1991-08-09	0.01
			1991-08-09	0.3
			1991-08-10	0.01
			1991-08-10	0.1
			1991-08-11	0.01
			1991-08-11	0.01
			1991-08-12	0.01
			1991-08-12	0.2
			1991-08-13	0.01
			1991-08-15	0.1
			1991-08-15	0.4
			1991-08-17	0.01
			1991-08-17	0.3
			1991-08-17	0.5
			1991-08-18	0.01
			1991-08-18	0.01
			1991-08-18	0.7
			1991-08-18	2
			1991-08-19	0.01
			1991-08-20	0.01
			1991-08-20	0.01
			1991-08-21	0.5
			1991-08-21	4
			1991-08-22	0.1
			1991-08-22	0.4
			1991-08-23	0.01
			1991-08-23	0.01
			1991-08-23	15
			1991-08-24	0.01
			1991-08-28	0.01
			1991-08-30	0.01
			1991-08-31	0.4
			1991-09-02	0.1
			1991-09-02	0.2
			1991-09-03	0.01
			1991-09-03	0.2
			1991-09-04	0.01
			1991-09-08	0.01
			1991-09-08	0.01
			1991-09-08	0.01
			1991-09-09	0.3
			1991-09-11	0.01
			1991-09-11	0.7
			1991-09-12	0.2
			1991-09-13	0.3
			1991-09-13	0.4
			1991-09-15	0.01
			1991-09-16	0.01
			1991-09-20	0.01
			1991-09-20	465
			1991-09-21	0.1
			1991-09-22	0.1
			1991-09-27	0.1
			1991-09-27	0.26
			1991-09-28	0.3
			1991-09-29	0.25
			1991-10-01	0.5
			1991-10-01	1120
			1991-10-02	0.1
			1991-10-03	0.1
			1991-10-04	0.2
			1991-10-07	0.25
			1991-10-07	4
			1991-10-07	7
			1991-10-09	0.01
			1991-10-10	0.01
			1991-10-12	0.1
			1991-10-13	0.5
			1991-10-14	0.01
			1991-10-14	0.2
			1991-10-16	0.01
			1991-10-16	0.01
			1991-10-16	0.01
			1991-10-16	0.01
			1991-10-16	0.01
			1991-10-16	0.01
			1991-10-16	0.1
			1991-10-16	0.1
			1991-10-16	0.5
			1991-10-16	11.23
			1991-10-17	0.01
			1991-10-17	0.01
			1991-10-17	0.1
			1991-10-18	0.1
			1991-10-18	0.3
			1991-10-19	0.01
			1991-10-20	0.1
			1991-10-22	0.01
			1991-10-23	0.01
			1992-03-03	0.5
			1992-03-04	0.01
			1992-03-05	0.1
			1992-03-08	7.5
			1992-03-10	1
			1992-03-11	0.5
			1992-03-12	2
			1992-03-12	2
			1992-03-12	10
			1992-03-13	0.25
			1992-03-13	1
			1992-03-14	0.1
			1992-03-14	0.4
			1992-03-21	0.5
			1992-03-22	0.25
			1992-03-22	8
			1992-03-23	0.5
			1992-03-23	1.5
			1992-03-29	0.3
			1992-03-29	0.5
			1992-03-29	3
			1992-04-01	0.01
			1992-04-01	0.6
			1992-04-02	0.5
			1992-04-03	1
			1992-04-03	1
			1992-04-03	1.5
			1992-04-16	0.1
			1992-04-25	0.4
			1992-04-26	1.5
			1992-04-26	4
			1992-04-27	0.2
			1992-05-01	0.2
			1992-05-07	0.5
			1992-05-07	1
			1992-05-07	10
			1992-05-07	160
			1992-05-08	0.01
			1992-05-08	0.01
			1992-05-09	2
			1992-05-14	0.3
			1992-05-15	0.01
			1992-05-15	0.01
			1992-05-15	0.3
			1992-05-15	0.5
			1992-05-15	2
			1992-05-17	0.01
			1992-05-19	0.01
			1992-05-21	0.01
			1992-05-23	0.01
			1992-05-25	0.01
			1992-05-31	0.01
			1992-06-01	0.1
			1992-06-02	0.3
			1992-06-05	0.01
			1992-06-08	0.01
			1992-06-12	0.01
			1992-06-12	0.1
			1992-06-12	0.1
			1992-06-12	1
			1992-06-13	0.01
			1992-06-19	0.01
			1992-06-20	0.2
			1992-06-21	0.01
			1992-06-21	0.01
			1992-06-22	0.01
			1992-06-25	0.01
			1992-06-25	0.1
			1992-06-26	0.01
			1992-06-26	0.01
			1992-06-26	0.01
			1992-06-26	0.01
			1992-06-26	0.01
			1992-06-26	0.1
			1992-06-26	0.1
			1992-06-26	0.1
			1992-06-26	0.5
			1992-06-26	5
			1992-06-26	12
			1992-06-27	0.01
			1992-06-27	0.01
			1992-06-27	0.01
			1992-06-27	0.01
			1992-06-27	0.01
			1992-06-27	0.1
			1992-06-27	1
			1992-06-28	0.01
			1992-06-28	0.01
			1992-06-28	0.01
			1992-06-28	0.8
			1992-06-29	0.01
			1992-06-29	0.01
			1992-07-01	0.01
			1992-07-04	0.01
			1992-07-04	0.01
			1992-07-05	0.01
			1992-07-05	0.01
			1992-07-07	0.01
			1992-07-07	0.01
			1992-07-12	0.01
			1992-07-12	0.01
			1992-07-16	0.01
			1992-07-18	0.01
			1992-07-22	0.01
			1992-07-22	0.01
			1992-07-22	0.01
			1992-07-23	0.01
			1992-07-23	0.01
			1992-07-24	0.1
			1992-07-25	0.01
			1992-07-27	1.8
			1992-07-29	0.01
			1992-07-29	0.01
			1992-07-29	0.01
			1992-07-31	0.01
			1992-07-31	0.01
			1992-07-31	0.01
			1992-08-01	0.01
			1992-08-01	0.2
			1992-08-01	0.2
			1992-08-02	0.01
			1992-08-03	0.01
			1992-08-04	0.1
			1992-08-05	0.01
			1992-08-05	0.01
			1992-08-08	0.1
			1992-08-11	0.01
			1992-08-12	0.01
			1992-08-13	0.01
			1992-08-13	0.1
			1992-08-14	0.1
			1992-08-14	0.2
			1992-08-16	1
			1992-08-16	5
			1992-08-17	0.01
			1992-08-17	0.01
			1992-08-17	0.01
			1992-08-17	0.3
			1992-08-17	2
			1992-08-18	0.01
			1992-08-18	0.2
			1992-08-18	0.3
			1992-08-19	0.01
			1992-08-19	0.01
			1992-08-19	0.01
			1992-08-19	0.01
			1992-08-19	0.1
			1992-08-19	0.1
			1992-08-19	0.1
			1992-08-19	1
			1992-08-19	7
			1992-08-20	0.01
			1992-08-20	0.5
			1992-08-21	0.01
			1992-08-24	0.5
			1992-08-26	0.01
			1992-08-28	0.01
			1992-08-28	0.01
			1992-08-30	0.01
			1992-08-31	0.01
			1992-08-31	0.01
			1992-09-01	0.1
			1992-09-01	4
			1992-09-04	0.1
			1992-09-06	0.01
			1992-09-07	0.01
			1992-09-07	0.01
			1992-09-07	0.01
			1992-09-07	0.01
			1992-09-10	0.01
			1992-09-11	0.01
			1992-09-13	0.01
			1992-10-01	45
			1992-10-04	1.2
			1992-10-23	0.01
			1992-10-26	32
			1993-03-25	0.01
			1993-03-30	0.01
			1993-03-31	0.1
			1993-03-31	2
			1993-04-01	0.5
			1993-04-06	0.3
			1993-04-22	0.3
			1993-05-10	0.6
			1993-05-12	0.01
			1993-05-12	0.5
			1993-05-13	0
			1993-05-13	0.3
			1993-05-13	0.4
			1993-05-13	0.5
			1993-05-14	0.01
			1993-05-16	0.5
			1993-05-19	0.01
			1993-05-19	0.1
			1993-05-20	0.01
			1993-05-21	0.01
			1993-05-21	0.1
			1993-05-23	0.01
			1993-05-29	0.1
			1993-05-31	0.01
			1993-05-31	0.01
			1993-05-31	0.1
			1993-06-06	0.01
			1993-06-06	0.11
			1993-06-06	4
			1993-06-10	0.25
			1993-06-16	0.01
			1993-06-17	0.1
			1993-06-17	1.1
			1993-06-18	0.1
			1993-06-18	1.5
			1993-06-20	0.1
			1993-06-23	0.01
			1993-06-27	0.11
			1993-06-27	1
			1993-06-28	0.01
			1993-07-02	0.1
			1993-07-04	0.01
			1993-07-04	0.01
			1993-07-05	0.01
			1993-07-07	0.1
			1993-07-09	0.01
			1993-07-12	0.1
			1993-07-13	0.01
			1993-07-21	0.01
			1993-07-25	0.01
			1993-07-29	0.01
			1993-07-29	0.01
			1993-07-31	0.01
			1993-07-31	0.01
			1993-08-01	0.01
			1993-08-01	0.01
			1993-08-05	0.01
			1993-08-05	0.2
			1993-08-06	1
			1993-08-07	0.01
			1993-08-08	0.2
			1993-08-09	0.01
			1993-08-09	0.01
			1993-08-09	0.01
			1993-08-10	0.1
			1993-08-10	1.5
			1993-08-11	1.3
			1993-08-15	0.01
			1993-08-15	0.01
			1993-08-21	0.01
			1993-08-21	0.01
			1993-08-23	0.01
			1993-08-23	0.1
			1993-08-26	0.01
			1993-09-02	0.01
			1993-09-02	0.01
			1993-09-02	0.1
			1993-09-06	0.01
			1993-09-07	0.01
			1993-09-07	0.01
			1993-09-23	0.3
			1993-09-29	0.01
			1993-10-02	0.1
			1993-11-15	0.2
			1994-03-09	3
			1994-03-23	11
			1994-03-26	2.5
			1994-03-27	4
			1994-03-27	10
			1994-03-28	0.3
			1994-03-28	5
			1994-03-29	3
			1994-03-29	10
			1994-03-30	1
			1994-03-30	3
			1994-04-01	0.01
			1994-04-02	0.5
			1994-04-02	5
			1994-04-10	0.01
			1994-04-10	23
			1994-04-16	0.1
			1994-04-16	1.2
			1994-04-17	4
			1994-04-17	12
			1994-04-17	20
			1994-04-18	0.01
			1994-04-18	0.01
			1994-04-18	2
			1994-04-19	0.3
			1994-04-25	0.01
			1994-04-25	2
			1994-04-29	0.6
			1994-04-30	0.01
			1994-04-30	0.2
			1994-05-01	2
			1994-05-03	0.3
			1994-05-08	0.3
			1994-05-10	0.01
			1994-05-14	0.01
			1994-05-14	0.01
			1994-05-15	0.01
			1994-05-16	0.1
			1994-05-18	0.01
			1994-05-24	0.5
			1994-05-25	1.5
			1994-05-26	0.01
			1994-05-26	0.01
			1994-06-03	0.1
			1994-06-06	0.01
			1994-06-06	0.01
			1994-06-14	0.01
			1994-06-19	0.3
			1994-06-20	0.2
			1994-06-21	0.01
			1994-06-21	1
			1994-06-23	0.01
			1994-06-24	0.01
			1994-06-24	0.01
			1994-06-24	0.8
			1994-06-24	10
			1994-06-25	0.01
			1994-06-25	1
			1994-06-26	0.1
			1994-06-26	0.2
			1994-06-27	0.2
			1994-06-29	0.2
			1994-06-30	0.3
			1994-06-30	1
			1994-06-30	1.2
			1994-07-01	0.01
			1994-07-01	0.1
			1994-07-01	0.11
			1994-07-01	0.3
			1994-07-01	1150
			1994-07-02	0.01
			1994-07-02	0.01
			1994-07-02	0.3
			1994-07-03	0.01
			1994-07-03	0.01
			1994-07-03	0.01
			1994-07-03	0.01
			1994-07-03	0.01
			1994-07-04	0.01
			1994-07-04	0.01
			1994-07-04	0.01
			1994-07-04	0.01
			1994-07-04	0.1
			1994-07-04	0.1
			1994-07-05	0.01
			1994-07-05	0.01
			1994-07-05	0.01
			1994-07-05	0.01
			1994-07-05	0.01
			1994-07-07	0.1
			1994-07-08	0.01
			1994-07-09	0.01
			1994-07-09	0.01
			1994-07-09	0.01
			1994-07-09	0.1
			1994-07-09	0.3
			1994-07-09	0.5
			1994-07-10	0.01
			1994-07-10	0.01
			1994-07-10	0.3
			1994-07-11	0.01
			1994-07-11	0.01
			1994-07-12	0.01
			1994-07-12	0.01
			1994-07-13	0.01
			1994-07-13	0.1
			1994-07-13	0.2
			1994-07-13	0.5
			1994-07-13	1
			1994-07-14	0.01
			1994-07-14	0.1
			1994-07-14	0.1
			1994-07-14	0.1
			1994-07-14	0.2
			1994-07-14	3
			1994-07-15	0.01
			1994-07-15	0.1
			1994-07-15	0.1
			1994-07-15	0.2
			1994-07-15	0.5
			1994-07-15	1.8
			1994-07-15	3
			1994-07-16	0.01
			1994-07-16	0.1
			1994-07-16	0.2
			1994-07-16	0.3
			1994-07-17	0.01
			1994-07-17	0.01
			1994-07-17	0.1
			1994-07-17	0.2
			1994-07-17	0.3
			1994-07-17	0.81
			1994-07-18	0.01
			1994-07-18	0.1
			1994-07-18	0.1
			1994-07-18	1.5
			1994-07-19	0.01
			1994-07-19	0.01
			1994-07-19	0.01
			1994-07-19	0.1
			1994-07-19	10
			1994-07-20	0.1
			1994-07-20	0.5
			1994-07-20	1.5
			1994-07-21	0.01
			1994-07-21	0.01
			1994-07-21	1
			1994-07-21	2.5
			1994-07-22	0.01
			1994-07-22	0.01
			1994-07-22	0.1
			1994-07-23	0.01
			1994-07-23	0.01
			1994-07-23	0.01
			1994-07-23	0.2
			1994-07-23	0.25
			1994-07-24	0.01
			1994-07-24	0.01
			1994-07-24	0.01
			1994-07-24	0.01
			1994-07-24	0.01
			1994-07-24	0.01
			1994-07-24	0.01
			1994-07-24	0.01
			1994-07-24	0.01
			1994-07-24	0.1
			1994-07-24	0.1
			1994-07-24	0.1
			1994-07-24	0.1
			1994-07-24	0.2
			1994-07-24	0.2
			1994-07-24	0.2
			1994-07-24	0.4
			1994-07-24	0.5
			1994-07-25	0.01
			1994-07-25	0.01
			1994-07-25	0.1
			1994-07-26	0.01
			1994-07-26	0.1
			1994-07-26	0.11
			1994-07-26	0.2
			1994-07-26	1
			1994-07-26	1
			1994-07-26	2
			1994-07-26	2
			1994-07-27	0.01
			1994-07-27	0.01
			1994-07-27	0.01
			1994-07-27	0.01
			1994-07-27	0.2
			1994-07-27	0.2
			1994-07-27	1
			1994-07-27	3
			1994-07-28	0.1
			1994-07-28	6
			1994-07-29	0.25
			1994-07-30	0.1
			1994-07-30	0.11
			1994-07-30	0.2
			1994-07-30	2
			1994-07-30	40
			1994-07-31	0.01
			1994-07-31	0.2
			1994-07-31	0.2
			1994-08-02	0.01
			1994-08-02	0.01
			1994-08-02	0.01
			1994-08-02	0.01
			1994-08-02	0.2
			1994-08-02	0.3
			1994-08-02	0.5
			1994-08-03	0.01
			1994-08-03	0.1
			1994-08-03	0.1
			1994-08-03	0.1
			1994-08-03	0.1
			1994-08-03	0.1
			1994-08-03	0.1
[truncated: 893 more rows]

## Sheet: IMPROVE data
													PM2.5-10	PM2.5 mass	PM10 mass
NET	SITE	DATE	POC	SNAME	LAT	LON	ELEV	OMCf:VAL	OCf:VAL	RCFM:VAL	SOILf:VAL	ECf:VAL	CM_calculated:VAL	MF:VAL	MT:VAL	ammNO3f:VAL	NO3f:VAL	N2f:VAL	SO4f:VAL	ammSO4f:VAL	aerosol_bext:VAL	Pf:VAL	FEf:VAL
INA	FLAT1	2002-06-19	1	Flathead	47.7734	-114.269	1580	0.57344	0.4096	1.31004	0.21562	0.0487	1.2402	1.6026	2.8428	0.07005	0.0543	0	0.2062	0.40223	7.48093	0	0.00997
INA	FLAT1	2002-06-22	1	Flathead	47.7734	-114.269	1580	3.34194	2.3871	5.58565	0.78358	0.2246	4.9758	6.0465	11.0223	0.62668	0.4858	0.0978	0.3707	0.60885	29.1682	0	0.03559
INA	FLAT1	2002-06-25	1	Flathead	47.7734	-114.269	1580	2.27906	1.6279	3.89444	0.46597	0.1534	4.6254	5.1856	9.811	0.13468	0.1044	0.0499	0.525	0.86134	21.7799	0	0.035
INA	FLAT1	2002-06-28	1	Flathead	47.7734	-114.269	1580	1.0843	0.7745	2.69796	0.77302	0.0906	7.2886	3.0664	10.355	0.1063	0.0824	0.0267	0.381	0.64375	16.3297	0	0.05188
INA	FLAT1	2002-07-01	1	Flathead	47.7734	-114.269	1580	0.26894	0.1921	1.48153	0.15441	0.0355	3.1686	1.7213	4.8899	0.16241	0.1259	0.0177	0.3987	0.86027	10.6962	0	0.00983
INA	FLAT1	2002-07-04	1	Flathead	47.7734	-114.269	1580	0.77602	0.5543	2.18502	0.58487	0.0865	7.4078	2.6596	10.0674	0.08411	0.0652	0	0.3992	0.65352	14.1989	0	0.03537
INA	FLAT1	2002-07-07	1	Flathead	47.7734	-114.269	1580	1.84338	1.3167	3.18541	0.76652	0.1113	10.1943	3.858	14.0523	0.1201	0.0931	0.021	0.2317	0.34411	18.6423	0	0.03719
INA	FLAT1	2002-07-10	1	Flathead	47.7734	-114.269	1580	1.7493	1.2495	3.11008	0.74155	0.0979	6.787	4.1607	10.9477	0.12694	0.0984	0	0.2133	0.39439	16.4653	0	0.04884
INA	FLAT1	2002-07-13	1	Flathead	47.7734	-114.269	1580	3.74864	2.6776	5.69339	1.0157	0.1395	10.5878	7.2174	17.8052	0.11829	0.0917	0	0.4242	0.67126	29.3243	0	0.06068
INA	FLAT1	2002-07-16	1	Flathead	47.7734	-114.269	1580	5.49654	3.9261	7.98515	0.82498	0.4514	7.861	9.1933	17.0543	0.14009	0.1086	0	0.6155	1.07213	40.5879	0	0.05354
INA	FLAT1	2002-07-19	1	Flathead	47.7734	-114.269	1580	6.13354	4.3811	9.11908	1.51883	0.5102	5.589	10.7654	16.3544	0.11571	0.0897	0	0.485	0.8408	41.2518	0	0.09975
INA	FLAT1	2002-07-22	1	Flathead	47.7734	-114.269	1580	1.39552	0.9968	3.29283	0.32126	0.0809	3.1643	3.8614	7.0257	0.06192	0.048	0	0.8004	1.43323	19.1517	0	0.01597
INA	FLAT1	2002-07-25	1	Flathead	47.7734	-114.269	1580	7.1113	5.0795	9.79431	1.02655	0.4579	10.1468	11.8026	21.9494	0.40029	0.3103	0.1034	0.6071	0.79827	48.5887	0	0.08723
INA	FLAT1	2002-07-28	1	Flathead	47.7734	-114.269	1580	2.5816	1.844	4.63049	0.83463	0.1684	12.7556	4.7281	17.4837	0.16048	0.1244	0	0.5364	0.88539	27.8717	0	0.05443
INA	FLAT1	2002-07-31	1	Flathead	47.7734	-114.269	1580	1.30592	0.9328	2.48233	0.45588	0.146	9.9609	2.8185	12.7794	0.08501	0.0659	0	0.3459	0.48951	17.1665	0	0.03733
INA	FLAT1	2002-08-03	1	Flathead	47.7734	-114.269	1580	1.54154	1.1011	3.54678	1.00383	0.1751	9.0619	3.4868	12.5487	0.12552	0.0973	0	0.4671	0.7008	19.9853	0	0.05507
INA	FLAT1	2002-08-06	1	Flathead	47.7734	-114.269	1580	3.67192	2.6228	5.03676	0.29949	0.2368	2.5657	5.4778	8.0435	0.21685	0.1681	0.0153	0.3798	0.6117	24.537	0	0.01559
INA	FLAT1	2002-08-09	1	Flathead	47.7734	-114.269	1580	1.90386	1.3599	3.48696	0.6911	0.2257	5.7527	3.6019	9.3546	0.10501	0.0814	0.0205	0.3413	0.56129	18.5526	0	0.04105
INA	FLAT1	2002-08-12	1	Flathead	47.7734	-114.269	1580	-999	-999	-999	0.52347	-999	4.3546	2.9225	7.2771	0.09469	0.0734	0	0.3381	0.69432	-999	0	0.02237
INA	FLAT1	2002-08-15	1	Flathead	47.7734	-114.269	1580	-999	-999	-999	0.80209	-999	5.7945	2.4016	8.1961	0.05779	0.0448	0	0.146	0.2838	-999	0	0.03913
INA	FLAT1	2002-08-18	1	Flathead	47.7734	-114.269	1580	-999	-999	-999	1.20507	-999	10.5059	4.2358	14.7417	0.12913	0.1001	0	0.2585	0.39505	-999	0	0.06619
INA	FLAT1	2002-08-21	1	Flathead	47.7734	-114.269	1580	-999	-999	-999	0.51968	-999	3.3337	4.4375	7.7712	0.18899	0.1465	0.02	0.3481	0.53691	-999	0	0.02522
INA	FLAT1	2002-08-24	1	Flathead	47.7734	-114.269	1580	-999	-999	-999	0.57124	-999	7.1584	5.4977	12.6561	0.12539	0.0972	0.0169	0.3956	0.5346	-999	0	0.02327
INA	FLAT1	2002-08-27	1	Flathead	47.7734	-114.269	1580	1.80194	1.2871	2.81571	0.16828	0.1284	2.9265	3.1061	6.0326	0.09946	0.0771	0.0173	0.4073	0.61764	15.2994	0	0.00902
INA	FLAT1	2002-08-30	1	Flathead	47.7734	-114.269	1580	0.5733	0.4095	2.07227	0.94405	0.0237	4.6209	2.1611	6.782	0.07314	0.0567	0.0173	0.383	0.45808	9.86443	0	0.05119
INA	FLAT1	2002-09-02	1	Flathead	47.7734	-114.269	1580	2.17602	1.5543	3.46121	0.53671	0.1301	9.4502	10.7218	20.172	0.05663	0.0439	0.0158	0.332	0.56174	21.1651	0.00746	0.02736
INA	FLAT1	2002-09-05	1	Flathead	47.7734	-114.269	1580	1.77422	1.2673	3.27658	0.524	0.1335	5.6623	2.0218	7.6841	0.26497	0.2054	0.0534	0.3957	0.57989	19.1206	0	0.02507
INA	FLAT1	2002-09-08	1	Flathead	47.7734	-114.269	1580	0.97216	0.6944	2.39497	0.24819	0.0709	3.0207	2.691	5.7117	0.14474	0.1122	0.0222	0.6728	0.95898	15.499	0	0.01271
INA	FLAT1	2002-09-11	1	Flathead	47.7734	-114.269	1580	3.20754	2.2911	4.87837	0.74667	0.2582	7.9555	5.0806	13.0361	0.14035	0.1088	0.0197	0.301	0.52561	26.2665	0	0.03101
INA	FLAT1	2002-09-14	1	Flathead	47.7734	-114.269	1580	3.84328	2.7452	6.96111	1.37794	0.2285	8.6311	7.8163	16.4474	0.2491	0.1931	0.0269	0.8104	1.26229	36.321	0	0.08271
INA	FLAT1	2002-09-17	1	Flathead	47.7734	-114.269	1580	1.06932	0.7638	2.22463	0.36583	0.1007	1.9927	2.3984	4.3911	0.11726	0.0909	0	0.3775	0.57152	12.3629	0	0.01709
INA	FLAT1	2002-09-20	1	Flathead	47.7734	-114.269	1580	0.40992	0.2928	1.59949	0.71232	0.0242	3.391	2.0102	5.4012	0.05663	0.0439	0.0171	0.2206	0.39641	8.25748	0	0.03569
INA	FLAT1	2002-09-23	1	Flathead	47.7734	-114.269	1580	2.03994	1.4571	3.29269	0.5187	0.1544	5.4194	3.7159	9.1353	0.11481	0.089	0.0169	0.3093	0.46485	18.1171	0	0.02777
INA	FLAT1	2002-09-26	1	Flathead	47.7734	-114.269	1580	3.0331	2.1665	5.23544	1.10332	0.1959	7.7539	5.9354	13.6893	0.15983	0.1239	0.015	0.4215	0.74328	27.081	0	0.05729
INA	FLAT1	2002-09-29	1	Flathead	47.7734	-114.269	1580	1.91114	1.3651	3.28305	0.6409	0.1187	4.7234	3.6977	8.4211	0.14061	0.109	0.015	0.2902	0.47169	17.2111	0	0.035
INA	FLAT1	2002-10-02	1	Flathead	47.7734	-114.269	1580	1.67146	1.1939	2.80404	0.16191	0.195	1.6028	2.1235	3.7263	0.3225	0.25	0.017	0.2884	0.45317	16.9034	0	0.01352
INA	FLAT1	2002-10-05	1	Flathead	47.7734	-114.269	1580	1.92766	1.3769	3.18993	0.13461	0.2414	0.937	2.8887	3.8257	0.23736	0.184	0.0169	0.4789	0.6489	18.9839	0	0.00613
INA	FLAT1	2002-10-08	1	Flathead	47.7734	-114.269	1580	2.37734	1.6981	3.53585	0.33915	0.1793	1.9478	3.4503	5.3981	0.10694	0.0829	0.0158	0.3557	0.53312	18.7051	0	0.0179
INA	FLAT1	2002-10-11	1	Flathead	47.7734	-114.269	1580	1.295	0.925	2.36522	0.36781	0.1377	3.8187	2.2109	6.0296	0.15003	0.1163	0.0137	0.268	0.41469	14.417	0	0.02036
INA	FLAT1	2002-10-14	1	Flathead	47.7734	-114.269	1580	2.58972	1.8498	3.94796	0.44873	0.2605	4.1099	3.9641	8.074	0.14951	0.1159	0.015	0.3068	0.4995	21.8559	0	0.0245
INA	FLAT1	2002-10-17	1	Flathead	47.7734	-114.269	1580	3.8297	2.7355	6.09891	1.25891	0.3774	5.9303	5.6299	11.5602	0.19363	0.1501	0.0189	0.2904	0.43927	29.7389	0	0.06769
INA	FLAT1	2002-10-20	1	Flathead	47.7734	-114.269	1580	3.6946	2.639	6.8998	1.38902	0.474	7.7888	6.7694	14.5582	0.43641	0.3383	0.0158	0.5734	0.90577	37.9421	0	0.09331
INA	FLAT1	2002-10-23	1	Flathead	47.7734	-114.269	1580	0.3479	0.2485	2.03344	0.5569	0.0479	2.2842	2.2484	4.5326	0.10423	0.0808	0.0197	0.7749	0.97651	13.7517	0	0.02742
INA	FLAT1	2002-10-26	1	Flathead	47.7734	-114.269	1580	4.18726	2.9909	7.34508	0.96619	0.3533	7.5048	7.091	14.5958	0.97679	0.7572	0.0343	0.646	0.86155	42.6822	0	0.04699
INA	FLAT1	2002-10-29	1	Flathead	47.7734	-114.269	1580	0.17906	0.1279	2.24613	0.33257	0.0357	1.3966	2.3013	3.6979	0.18563	0.1439	0.0168	1.1599	1.51317	17.8898	0	0.01337
INA	FLAT1	2002-11-01	1	Flathead	47.7734	-114.269	1580	3.36084	2.4006	6.22711	0.47905	0.3442	3.505	5.8253	9.3303	1.17442	0.9104	0.0181	0.6678	0.8686	41.7159	0	0.02126
INA	FLAT1	2002-11-04	1	Flathead	47.7734	-114.269	1580	5.39406	3.8529	8.59912	0.49161	0.3685	4.037	7.9657	12.0027	1.51252	1.1725	0.0214	0.556	0.83242	53.7116	0	0.02211
INA	FLAT1	2002-11-07	1	Flathead	47.7734	-114.269	1580	2.4913	1.7795	4.2859	0.84812	0.31	8.1916	4.0459	12.2375	0.20459	0.1586	0.0193	0.4009	0.43189	25.7596	0	0.04173
INA	FLAT1	2002-11-10	1	Flathead	47.7734	-114.269	1580	1.01066	0.7219	1.45377	0.10638	0.1101	0.1894	1.1574	1.3468	0.09043	0.0701	0.0171	0.0946	0.13621	7.83173	0	0.00509
INA	FLAT1	2002-11-13	1	Flathead	47.7734	-114.269	1580	1.82784	1.3056	2.66971	0.10796	0.1821	0.6882	2.5969	3.2851	0.19879	0.1541	0.0276	0.1943	0.35302	15.6624	0	0.00831
INA	FLAT1	2002-11-16	1	Flathead	47.7734	-114.269	1580	1.96588	1.4042	3.55543	0.22389	0.2172	2.1685	3.4869	5.6554	0.14242	0.1104	0.0172	0.6693	1.00605	24.0673	0	0.01153
INA	FLAT1	2002-11-19	1	Flathead	47.7734	-114.269	1580	1.03306	0.7379	1.45212	0.04462	0.1445	0.739	1.4497	2.1887	0.0734	0.0569	0.0151	0.0825	0.15654	8.56936	0.00581	0.00151
INA	FLAT1	2002-11-22	1	Flathead	47.7734	-114.269	1580	2.50054	1.7861	3.26596	0.07593	0.2638	0.5995	3.2074	3.8069	0.15609	0.121	0.016	0.1555	0.26961	17.7117	0	0.00455
INA	FLAT1	2002-11-25	1	Flathead	47.7734	-114.269	1580	1.42926	1.0209	2.42317	0.10414	0.1928	-999	2.0005	-999	0.3194	0.2476	0.0152	0.2331	0.37756	-999	0	0.00347
INA	FLAT1	2002-11-28	1	Flathead	47.7734	-114.269	1580	3.33466	2.3819	5.60573	0.13897	0.2807	0.9703	5.0426	6.0129	1.33141	1.0321	0.0424	0.307	0.52	37.0286	0	0.00555
INA	FLAT1	2002-12-01	1	Flathead	47.7734	-114.269	1580	2.20654	1.5761	3.06286	0.06557	0.1661	0.2946	3.0929	3.3875	0.2918	0.2262	0.0183	0.2043	0.33285	17.6256	0	0.00467
INA	FLAT1	2002-12-04	1	Flathead	47.7734	-114.269	1580	0.56644	0.4046	1.40768	0.02233	0.0755	0.6617	1.2014	1.8631	0.20782	0.1611	0.0162	0.3433	0.53559	11.6473	0	0.00077
INA	FLAT1	2002-12-07	1	Flathead	47.7734	-114.269	1580	1.41834	1.0131	2.83206	0.03513	0.1804	0.4208	2.0892	2.51	0.90106	0.6985	0.0333	0.1677	0.29712	20.993	0	0.00163
INA	FLAT1	2002-12-10	1	Flathead	47.7734	-114.269	1580	0.7231	0.5165	1.67769	0.11067	0.0759	1.5675	1.3917	2.9592	0.44054	0.3415	0.0287	0.2079	0.32748	13.1815	0	0.00903
INA	FLAT1	2002-12-13	1	Flathead	47.7734	-114.269	1580	0.35238	0.2517	1.15902	0.48523	0.0365	2.5834	1.1624	3.7458	0.05869	0.0455	0	0.1446	0.22622	6.95519	0	0.02272
INA	FLAT1	2002-12-16	1	Flathead	47.7734	-114.269	1580	0	0	0.3103	0.10917	0.0031	1.7837	0.3353	2.119	0.07585	0.0588	0.0163	0.0707	0.12218	3.39669	0	0.00407
INA	FLAT1	2002-12-19	1	Flathead	47.7734	-114.269	1580	0.25046	0.1789	0.60859	0.05756	0.0417	0.7413	0.6392	1.3805	0.10823	0.0839	0.0171	0.1059	0.15065	4.77917	0	0.00155
INA	FLAT1	2002-12-22	1	Flathead	47.7734	-114.269	1580	3.09274	2.2091	5.67509	0.14142	0.2754	2.2963	5.4012	7.6975	1.49472	1.1587	0.0322	0.3836	0.67081	40.5516	0	0.00471
INA	FLAT1	2002-12-25	1	Flathead	47.7734	-114.269	1580	0.83538	0.5967	2.19405	0.10938	0.1041	1.0796	1.8244	2.904	0.8007	0.6207	0.0158	0.2143	0.34448	17.7825	0	0.00425
INA	FLAT1	2002-12-28	1	Flathead	47.7734	-114.269	1580	0.13748	0.0982	0.72924	0.15203	0.0277	0.8019	0.7783	1.5802	0.05018	0.0389	0	0.257	0.36184	6.00886	0	0.00519
INA	FLAT1	2002-12-31	1	Flathead	47.7734	-114.269	1580	0.17822	0.1273	0.29674	0.0195	0.0124	0.2387	0.1815	0.4202	0.02438	0.0189	0	0.0442	0.06225	1.95596	0	0.00065
INA	FLAT1	2003-01-03	1	Flathead	47.7734	-114.269	1580	0.17066	0.1219	0.41314	0.01697	0	0.9584	0.831	1.7894	0.07301	0.0566	0	0.115	0.1525	3.7508	0	0.00108
INA	FLAT1	2003-01-06	1	Flathead	47.7734	-114.269	1580	0.47362	0.3383	0.77724	0.02516	0.0434	0.2902	0.5567	0.8469	0.12203	0.0946	0	0.0714	0.11303	5.10871	0	0.00066
INA	FLAT1	2003-01-09	1	Flathead	47.7734	-114.269	1580	0.49868	0.3562	1.71136	0.09928	0.0734	1.2841	1.553	2.8371	0.45705	0.3543	0.0203	0.4271	0.58294	15.0176	0	0.00472
INA	FLAT1	2003-01-12	1	Flathead	47.7734	-114.269	1580	0.94276	0.6734	1.56271	0.06699	0.1252	1.2644	1.3186	2.583	0.1619	0.1255	0.0171	0.1769	0.26586	10.5454	0	0.0034
INA	FLAT1	2003-01-15	1	Flathead	47.7734	-114.269	1580	0.78372	0.5598	1.34484	0.02633	0.0764	0.1221	1.0212	1.1433	0.3087	0.2393	0.0179	0.0884	0.1497	9.03162	0	0.00105
INA	FLAT1	2003-01-18	1	Flathead	47.7734	-114.269	1580	1.05182	0.7513	2.90391	0.05619	0.1123	1.3656	2.1277	3.4933	1.45086	1.1247	0.023	0.1367	0.23273	24.6917	0	0.00115
INA	FLAT1	2003-01-21	1	Flathead	47.7734	-114.269	1580	1.19182	0.8513	2.56693	0.06689	0.1083	2.0433	2.2098	4.2531	0.65571	0.5083	0.0213	0.3906	0.54421	20.3182	0	0.00345
INA	FLAT1	2003-01-24	1	Flathead	47.7734	-114.269	1580	0.25788	0.1842	0.71151	0.03716	0.0016	1.312	1.0593	2.3713	0.19802	0.1535	0.0238	0.1714	0.21685	6.42711	0	0.00202
INA	FLAT1	2003-01-27	1	Flathead	47.7734	-114.269	1580	0.17472	0.1248	0.59175	0.01034	0.0045	0.4451	0.3546	0.7997	0.19982	0.1549	0	0.1531	0.20237	5.43736	0	0.00108
INA	FLAT1	2003-01-30	1	Flathead	47.7734	-114.269	1580	0.28574	0.2041	0.42637	0.03108	0.0045	0.0842	-0.0584	0.0842	0.05134	0.0398	0.0248	0.0353	0.05371	2.423	0	0.00484
INA	FLAT1	2003-02-02	1	Flathead	47.7734	-114.269	1580	0.22932	0.1638	0.44797	0.03724	0.0273	0.1144	0.4748	0.5892	0.03251	0.0252	0.0202	0.0869	0.12161	2.7664	0.00142	0.0007
INA	FLAT1	2003-02-05	1	Flathead	47.7734	-114.269	1580	0.93394	0.6671	1.56742	0.05495	0.1516	0.3779	1.6844	2.0623	0.09017	0.0699	0.0159	0.2727	0.33676	9.60642	0	0.00786
INA	FLAT1	2003-02-08	1	Flathead	47.7734	-114.269	1580	1.57094	1.1221	3.45019	0.04867	0.2426	0.4177	3.0964	3.5141	1.04129	0.8072	0.0212	0.438	0.54669	24.1583	0	0.00228
INA	FLAT1	2003-02-11	1	Flathead	47.7734	-114.269	1580	1.12084	0.8006	2.59265	0.06806	0.1917	0.534	2.1293	2.6633	0.68409	0.5303	0.018	0.4049	0.52796	18.3517	0	0.00413
INA	FLAT1	2003-02-14	1	Flathead	47.7734	-114.269	1580	1.9446	1.389	3.25597	0.10195	0.2407	0.9102	2.6891	3.5993	0.68628	0.532	0.0221	0.2258	0.28244	20.0751	0	0.00504
INA	FLAT1	2003-02-17	1	Flathead	47.7734	-114.269	1580	0.11032	0.0788	0.23587	0.00809	0	0.7907	0.1773	0.968	0.0129	0.01	0	0.0806	0.10457	2.04444	0	0.00078
INA	FLAT1	2003-02-20	1	Flathead	47.7734	-114.269	1580	0.11466	0.0819	0.38095	0.04394	0	1.8502	0.5067	2.3569	0.10978	0.0851	0.0199	0.0818	0.11257	3.73392	0.0017	0.00157
INA	FLAT1	2003-02-23	1	Flathead	47.7734	-114.269	1580	2.02888	1.4492	4.20992	0.15199	0.2507	2.5851	3.7665	6.3516	0.33501	0.2597	0.0299	1.1344	1.44334	29.291	0	0.00694
INA	FLAT1	2003-02-26	1	Flathead	47.7734	-114.269	1580	1.59768	1.1412	4.7824	0.36718	0.2173	5.2694	4.3591	9.6285	1.58322	1.2273	0.0154	0.712	1.01702	36.8988	0	0.01657
INA	FLAT1	2003-03-01	1	Flathead	47.7734	-114.269	1580	1.61056	1.1504	5.05936	0.12592	0.5556	1.4684	4.6394	6.1078	1.36069	1.0548	0.0191	0.9695	1.40658	36.7484	0	0.00765
INA	FLAT1	2003-03-04	1	Flathead	47.7734	-114.269	1580	1.2957	0.9255	2.95868	0.07745	0.1961	0.4663	2.8311	3.2974	0.21104	0.1636	0.0184	0.8478	1.17839	19.4224	0	0.0032
INA	FLAT1	2003-03-07	1	Flathead	47.7734	-114.269	1580	0.44324	0.3166	1.02142	0.09755	0.0884	1.602	0.7683	2.3703	0.06863	0.0532	0	0.2128	0.32361	7.08108	0	0.0061
INA	FLAT1	2003-03-10	1	Flathead	47.7734	-114.269	1580	0.37618	0.2687	0.87832	0.05499	0.0634	0.5779	0.5935	1.1714	0.13597	0.1054	0.015	0.169	0.24779	5.83307	0	0.00345
INA	FLAT1	2003-03-13	1	Flathead	47.7734	-114.269	1580	0.53102	0.3793	1.58344	0.42903	0.0979	3.543	1.6026	5.1456	0.08927	0.0692	0	0.3308	0.43622	10.1666	0	0.02994
INA	FLAT1	2003-03-16	1	Flathead	47.7734	-114.269	1580	0.49882	0.3563	1.04501	0.24384	0.0762	1.2465	0.7911	2.0376	0.08075	0.0626	0.0162	0.0941	0.14541	5.68947	0	0.01464
INA	FLAT1	2003-03-19	1	Flathead	47.7734	-114.269	1580	0.91336	0.6524	1.98128	0.19762	0.1173	2.1789	2.0374	4.2163	0.36649	0.2841	0	0.2938	0.38651	12.7922	0	0.01373
INA	FLAT1	2003-03-22	1	Flathead	47.7734	-114.269	1580	0.10472	0.0748	0.44795	0.18064	0.012	0.763	0.3531	1.1161	0.09082	0.0704	0	0.0503	0.05977	2.46936	0	0.00402
INA	FLAT1	2003-03-25	1	Flathead	47.7734	-114.269	1580	0.15736	0.1124	0.88796	0.13711	0.0365	1.3662	0.973	2.3392	0.1548	0.12	0	0.2619	0.40219	6.73022	0	0.00903
INA	FLAT1	2003-03-28	1	Flathead	47.7734	-114.269	1580	0.29498	0.2107	1.11019	0.08634	0.0564	1.5113	0.9298	2.4411	0.2749	0.2131	0.0204	0.2546	0.39757	8.50681	0	0.00285
INA	FLAT1	2003-03-31	1	Flathead	47.7734	-114.269	1580	0.22414	0.1601	0.76601	0.16027	0.0332	1.9154	1.3058	3.2212	0.09443	0.0732	0	0.1673	0.25398	5.52738	0	0.01104
INA	FLAT1	2003-04-03	1	Flathead	47.7734	-114.269	1580	0.15526	0.1109	0.83146	0.07299	0.0089	1.7458	0.7492	2.495	0.28754	0.2229	0.019	0.2142	0.30678	6.48401	0	0.0038
INA	FLAT1	2003-04-06	1	Flathead	47.7734	-114.269	1580	0.67522	0.4823	2.62719	0.25662	0.0771	1.6145	2.4016	4.0161	0.43499	0.3372	0.0167	0.7852	1.18326	17.3681	0	0.01755
INA	FLAT1	2003-04-09	1	Flathead	47.7734	-114.269	1580	0.54628	0.3902	1.44	0.33203	0.0713	1.3929	1.4348	2.8277	0.14293	0.1108	0	0.2488	0.34745	7.90557	0	0.02382
INA	FLAT1	2003-04-12	1	Flathead	47.7734	-114.269	1580	1.47504	1.0536	2.94628	0.32601	0.2074	1.0581	2.6844	3.7425	0.43318	0.3358	0.0257	0.382	0.50465	16.2783	0	0.01867
INA	FLAT1	2003-04-15	1	Flathead	47.7734	-114.269	1580	0.483	0.345	1.30239	0.13804	0.0572	1.9745	1.2384	3.2129	0.20756	0.1609	0	0.284	0.41658	8.7138	0	0.00993
INA	FLAT1	2003-04-18	1	Flathead	47.7734	-114.269	1580	0.9702	0.693	2.58632	0.44228	0.1277	2.7429	2.4966	5.2395	0.30702	0.238	0	0.513	0.73912	15.4371	0	0.03014
INA	FLAT1	2003-04-21	1	Flathead	47.7734	-114.269	1580	1.85794	1.3271	3.68152	0.63052	0.1872	3.4816	3.8416	7.3232	0.18795	0.1457	0.019	0.5502	0.81791	19.8991	0	0.04101
INA	FLAT1	2003-04-24	1	Flathead	47.7734	-114.269	1580	2.69388	1.9242	5.0169	0.38255	0.2759	2.4174	4.7375	7.1549	0.48362	0.3749	0.0206	0.7942	1.18095	28.4011	0	0.0262
INA	FLAT1	2003-04-27	1	Flathead	47.7734	-114.269	1580	0.1764	0.126	0.69561	0.09437	0.0385	0.6624	0.6683	1.3307	0.10514	0.0815	0	0.1822	0.2812	4.60743	0	0.0059
INA	FLAT1	2003-04-30	1	Flathead	47.7734	-114.269	1580	1.14828	0.8202	2.10373	0.1621	0.1476	3.0607	1.9701	5.0308	0.28135	0.2181	0	0.304	0.3644	13.1239	0	0.00888
INA	FLAT1	2003-05-03	1	Flathead	47.7734	-114.269	1580	0.56966	0.4069	1.27912	0.28949	0.0774	2.2787	1.4358	3.7145	0.1063	0.0824	0	0.162	0.23628	7.41227	0	0.01771
INA	FLAT1	2003-05-06	1	Flathead	47.7734	-114.269	1580	0.69244	0.4946	2.10693	0.26886	0.1009	2.5523	2.3946	4.9469	0.35036	0.2716	0	0.5991	0.69436	13.8219	0	0.0172
INA	FLAT1	2003-05-09	1	Flathead	47.7734	-114.269	1580	0.16338	0.1167	1.01068	0.1727	0.0414	0.3481	1.3366	1.6847	0.01445	0.0112	0	0.4511	0.61875	6.44501	0	0.0075
INA	FLAT1	2003-05-12	1	Flathead	47.7734	-114.269	1580	0.97846	0.6989	1.57676	0.10456	0.1276	0.9704	1.5662	2.5366	0.06308	0.0489	0	0.2373	0.30306	8.76552	0	0.00704
INA	FLAT1	2003-05-15	1	Flathead	47.7734	-114.269	1580	1.59474	1.1391	3.98451	0.72885	0.1685	4.7841	4.4059	9.19	0.20047	0.1554	0	0.8572	1.29195	23.4384	0	0.05263
INA	FLAT1	2003-05-18	1	Flathead	47.7734	-114.269	1580	0.81564	0.5826	1.83773	0.10454	0.09	0.9499	1.9676	2.9175	0.08682	0.0673	0	0.4945	0.74073	11.3664	0	0.00541
INA	FLAT1	2003-05-21	1	Flathead	47.7734	-114.269	1580	0.9247	0.6605	1.90074	0.23718	0.1241	2.6061	2.2176	4.8237	0.16641	0.129	0	0.3407	0.44835	11.5911	0	0.01515
INA	FLAT1	2003-05-24	1	Flathead	47.7734	-114.269	1580	1.72158	1.2297	3.37079	0.63519	0.2153	4.1263	3.9342	8.0605	0.13055	0.1012	0.0182	0.4988	0.66817	18.4522	0	0.04433
INA	FLAT1	2003-05-27	1	Flathead	47.7734	-114.269	1580	1.56716	1.1194	2.80234	0.31599	0.1853	2.6835	3.4936	6.1771	0.10178	0.0789	0	0.4707	0.63212	15.8382	0	0.02126
INA	FLAT1	2003-05-30	1	Flathead	47.7734	-114.269	1580	3.7975	2.7125	5.58035	0.52742	0.3457	3.3628	6.8252	10.188	0.14603	0.1132	0.0192	0.6409	0.7637	28.3699	0	0.03509
INA	FLAT1	2003-06-02	1	Flathead	47.7734	-114.269	1580	2.1231	1.5165	3.81036	0.22687	0.2108	1.8888	5.1789	7.0677	0.12061	0.0935	0	0.7151	1.12897	21.8573	0	0.01628
INA	FLAT1	2003-06-05	1	Flathead	47.7734	-114.269	1580	2.73658	1.9547	4.8268	0.48154	0.2514	5.9828	5.8806	11.8634	0.1072	0.0831	0	0.7933	1.25008	28.2812	0	0.03764
INA	FLAT1	2003-06-08	1	Flathead	47.7734	-114.269	1580	2.79832	1.9988	4.53577	0.34402	0.2295	5.0116	5.8417	10.8533	0.08062	0.0625	0	0.7558	1.08331	26.0576	0	0.02435
INA	FLAT1	2003-06-11	1	Flathead	47.7734	-114.269	1580	1.12196	0.8014	2.0195	0.21526	0.0674	2.3648	2.4802	4.845	0.10681	0.0828	0	0.3331	0.50808	11.6659	0	0.01597
INA	FLAT1	2003-06-14	1	Flathead	47.7734	-114.269	1580	1.46034	1.0431	2.67361	0.29849	0.1173	4.789	3.3263	8.1153	0.10423	0.0808	0	0.4668	0.69325	16.5023	0	0.02507
INA	FLAT1	2003-06-17	1	Flathead	47.7734	-114.269	1580	3.17142	2.2653	4.8104	0.38365	0.2031	5.1119	5.4349	10.5468	0.09688	0.0751	0.0155	0.5579	0.95535	26.5011	0	0.02772
INA	FLAT1	2003-06-20	1	Flathead	47.7734	-114.269	1580	0.72296	0.5164	1.7503	0.23547	0.0544	2.4085	2.2759	4.6844	0.11855	0.0919	0.0589	0.4086	0.61892	10.9571	0	0.01911
INA	FLAT1	2003-06-23	1	Flathead	47.7734	-114.269	1580	0.46298	0.3307	1.64747	0.34836	0.0421	1.8427	1.8966	3.7393	0.21298	0.1651	0.0149	0.6339	0.58105	10.0156	0	0.02801
INA	FLAT1	2003-06-26	1	Flathead	47.7734	-114.269	1580	1.41218	1.0087	2.77148	0.37448	0.0988	6.0255	3.7132	9.7387	0.07714	0.0598	0.0145	0.4883	0.80887	17.6437	0	0.0331
INA	FLAT1	2003-06-29	1	Flathead	47.7734	-114.269	1580	2.26562	1.6183	3.33425	0.34963	0.1193	3.5264	3.7879	7.3143	0.04567	0.0354	0.0152	0.3163	0.55403	17.4705	0	0.01927
INA	FLAT1	2003-07-02	1	Flathead	47.7734	-114.269	1580	1.421	1.015	3.04201	0.54747	0.1928	4.5479	3.7773	8.3252	0.24149	0.1872	0	0.4267	0.63925	17.0974	0	0.04518
INA	FLAT1	2003-07-05	1	Flathead	47.7734	-114.269	1580	1.35436	0.9674	2.88165	0.44466	0.187	4.937	3.3555	8.2925	0.09043	0.0701	0	0.4827	0.8052	17.0085	0	0.03475
INA	FLAT1	2003-07-08	1	Flathead	47.7734	-114.269	1580	1.40042	1.0003	2.63794	0.26834	0.1553	4.5945	3.0459	7.6404	0.09159	0.071	0	0.4571	0.72229	15.9176	0	0.02318
INA	FLAT1	2003-07-11	1	Flathead	47.7734	-114.269	1580	2.97108	2.1222	4.44103	0.63158	0.2186	6.0214	5.1714	11.1928	0.0605	0.0469	0.0158	0.3548	0.55927	22.6841	0	0.04871
INA	FLAT1	2003-07-14	1	Flathead	47.7734	-114.269	1580	0.92652	0.6618	1.95296	0.31279	0.0979	5.795	2.2459	8.0409	0.0832	0.0645	0	0.3147	0.53254	12.8159	0	0.02878
INA	FLAT1	2003-07-17	1	Flathead	47.7734	-114.269	1580	1.73922	1.2423	3.27481	0.57838	0.1915	5.8202	3.744	9.5642	0.0614	0.0476	0	0.4199	0.7043	18.3406	0	0.04906
INA	FLAT1	2003-07-20	1	Flathead	47.7734	-114.269	1580	2.49382	1.7813	3.95014	0.47515	0.1902	6.3708	4.7914	11.1622	0.06785	0.0526	0	0.4282	0.72311	21.7512	0	0.04246
INA	FLAT1	2003-07-23	1	Flathead	47.7734	-114.269	1580	2.69822	1.9273	4.67088	0.86957	0.2111	8.2083	5.3946	13.6029	0.10862	0.0842	0	0.5197	0.78338	24.987	0	0.0888
INA	FLAT1	2003-07-26	1	Flathead	47.7734	-114.269	1580	18.681	13.3436	22.914	0.71798	1.8763	7.3062	24.6878	31.994	0.47872	0.3711	0	0.7734	1.15995	110.141	0	0.06345
INA	FLAT1	2003-07-29	1	Flathead	47.7734	-114.269	1580	10.5245	7.5175	13.4766	0.67802	1.1365	7.0592	13.9109	20.9701	0.23439	0.1817	0	0.5894	0.90321	66.3966	0	0.05584
INA	FLAT1	2003-08-01	1	Flathead	47.7734	-114.269	1580	20.8236	14.874	25.133	0.7682	2.1568	7.9589	27.7123	35.6712	0.34095	0.2643	0	0.6134	1.04342	119.834	0	0.05859
INA	FLAT1	2003-08-04	1	Flathead	47.7734	-114.269	1580	2.46162	1.7583	3.96508	0.19894	0.331	2.8864	4.2989	7.1853	0.19505	0.1512	0.0343	0.4491	0.77847	21.7169	0	0.01405
INA	FLAT1	2003-08-07	1	Flathead	47.7734	-114.269	1580	2.128	1.52	3.55742	0.43381	0.2325	4.2458	4.1118	8.3576	0.0734	0.0569	0	0.3455	0.6897	19.015	0	0.03219
INA	FLAT1	2003-08-10	1	Flathead	47.7734	-114.269	1580	13.9931	9.9951	16.0199	0.35577	0.8613	5.2148	16.9232	22.138	0.19002	0.1473	0	0.3374	0.6197	73.5844	0	0.0275
INA	FLAT1	2003-08-13	1	Flathead	47.7734	-114.269	1580	6.81408	4.8672	9.0821	0.69442	0.5853	7.1945	11.1173	18.3118	0.21775	0.1688	0	0.5415	0.77055	44.8508	0	0.05447
INA	FLAT1	2003-08-16	1	Flathead	47.7734	-114.269	1580	28.1229	20.0878	32.11	0.80254	1.1969	6.7588	36.8797	43.6385	0.51174	0.3967	0.022	1.051	1.47588	142.854	0	0.06649
INA	FLAT1	2003-08-19	1	Flathead	47.7734	-114.269	1580	8.56618	6.1187	10.7564	0.65153	0.5294	9.835	12.9825	22.8175	0.11636	0.0902	0	0.589	0.8929	52.9843	0	0.06269
INA	FLAT1	2003-08-22	1	Flathead	47.7734	-114.269	1580	26.0627	18.6162	29.011	0.67793	0.8314	5.7067	34.1706	39.8773	0.50116	0.3885	0.0265	0.6742	0.93778	126.466	0	0.06343
INA	FLAT1	2003-08-25	1	Flathead	47.7734	-114.269	1580	6.33668	4.5262	8.20818	0.27538	0.4333	5.1956	9.8094	15.005	0.14745	0.1143	0	0.6579	1.01537	40.9912	0	0.0208
INA	FLAT1	2003-08-28	1	Flathead	47.7734	-114.269	1580	20.8459	14.8899	24.7295	0.66905	1.3388	9.8694	26.2417	36.1111	0.6032	0.4676	0.0228	0.8746	1.27256	116.136	0	0.05892
INA	FLAT1	2003-08-31	1	Flathead	47.7734	-114.269	1580	-999	-999	-999	-999	-999	-999	-999	-999	-999	-999	-999	-999	-999	-999	-999	-999
INA	FLAT1	2003-09-03	1	Flathead	47.7734	-114.269	1580	-999	-999	-999	-999	-999	-999	-999	-999	-999	-999	-999	-999	-999	-999	-999	-999
INA	FLAT1	2003-09-06	1	Flathead	47.7734	-114.269	1580	8.7052	6.218	11.0693	0.74787	0.5985	8.7188	13.3473	22.0661	0.19053	0.1477	0.018	0.6186	0.82714	54.9365	0	0.04526
INA	FLAT1	2003-09-09	1	Flathead	47.7734	-114.269	1580	1.18972	0.8498	2.79839	0.9402	0.1144	0	3.0031	2.88	0.12049	0.0934	0	0.2207	0.43358	11.2811	0	0.04916
INA	FLAT1	2003-09-12	1	Flathead	47.7734	-114.269	1580	0.50274	0.3591	-999	-999	0.028	-999	-999	2.4101	0.02683	0.0208	0	0.2118	0.29122	-999	0	-999
INA	FLAT1	2003-09-15	1	Flathead	47.7734	-114.269	1580	1.13344	0.8096	2.22386	0.34702	0.0823	2.9758	2.325	5.3008	0.07366	0.0571	0	0.3042	0.58744	12.7847	0	0.01581
INA	FLAT1	2003-09-18	1	Flathead	47.7734	-114.269	1580	0.97426	0.6959	1.72473	0.15618	0.0574	2.1508	1.8116	3.9624	0.23568	0.1827	0.0204	0.2138	0.30121	10.2182	0	0.00776
INA	FLAT1	2003-09-21	1	Flathead	47.7734	-114.269	1580	1.35492	0.9678	2.51356	0.2926	0.099	4.6711	2.9719	7.643	0.11262	0.0873	0.0148	0.3546	0.65443	15.649	0	0.0178
INA	FLAT1	2003-09-24	1	Flathead	47.7734	-114.269	1580	2.40338	1.7167	3.81147	0.48209	0.2678	6.8242	4.517	11.3412	0.0894	0.0693	0	0.3743	0.5688	22.1403	0	0.02316
INA	FLAT1	2003-09-27	1	Flathead	47.7734	-114.269	1580	1.9761	1.4115	2.98932	0.29424	0.2541	2.9555	3.2862	6.2417	0.05869	0.0455	0	0.2443	0.40619	16.2367	0	0.01314
INA	FLAT1	2003-09-30	1	Flathead	47.7734	-114.269	1580	1.39594	0.9971	3.9835	0.52025	0.1326	4.8819	4.2404	9.1223	0.08424	0.0653	0	1.1694	1.85047	25.8562	0	0.02001
INA	FLAT1	2003-10-03	1	Flathead	47.7734	-114.269	1580	2.45546	1.7539	5.30783	1.35427	0.2434	6.3746	5.6652	12.0398	0.10746	0.0833	0.0123	0.7072	1.14725	28.9907	0	0.0602
INA	FLAT1	2003-10-06	1	Flathead	47.7734	-114.269	1580	5.20492	3.7178	8.45677	1.62482	0.4094	16.3908	9.5238	25.9146	0.14216	0.1102	0.0124	0.7089	1.07547	47.5873	0.01986	0.0917
INA	FLAT1	2003-10-09	1	Flathead	47.7734	-114.269	1580	0.46242	0.3303	1.5663	0.17352	0.0536	3.9521	1.722	5.6741	0.22988	0.1782	0	0.3992	0.64688	13.0054	0	0.01102
INA	FLAT1	2003-10-12	1	Flathead	47.7734	-114.269	1580	0.40446	0.2889	0.79911	0.04389	0.0611	1.2719	0.7	1.9719	0.06992	0.0542	0.0302	0.1254	0.21974	5.70361	0.00083	0.00345
INA	FLAT1	2003-10-15	1	Flathead	47.7734	-114.269	1580	0.77378	0.5527	1.27553	0.04017	0.0806	0.7257	1.4339	2.1596	0.12745	0.0988	0.0151	0.1298	0.25352	7.88549	0	0.0027
INA	FLAT1	2003-10-18	1	Flathead	47.7734	-114.269	1580	0.94906	0.6779	2.4245	0.60912	0.14	3.3188	2.4543	5.7731	0.06244	0.0484	0	0.4108	0.66388	14.486	0.01153	0.03226
INA	FLAT1	2003-10-21	1	Flathead	47.7734	-114.269	1580	0.86898	0.6207	1.43571	0.11553	0.1314	2.4583	1.6	4.0583	0.02503	0.0194	0	0.1832	0.29477	9.32578	0	0.00753
INA	FLAT1	2003-10-24	1	Flathead	47.7734	-114.269	1580	1.1235	0.8025	1.7022	0.12635	0.1432	2.0762	1.9962	4.0724	0.10591	0.0821	0.0265	0.1262	0.20324	10.1453	0	0.00722
INA	FLAT1	2003-10-27	1	Flathead	47.7734	-114.269	1580	2.2239	1.5885	3.03194	0.20689	0.2679	2.5738	3.5562	6.13	0.05857	0.0454	0.0158	0.1688	0.27468	16.395	0	0.01173
INA	FLAT1	2003-10-30	1	Flathead	47.7734	-114.269	1580	0.133	0.095	1.03701	0.07307	0.0678	1.1334	1.4115	2.5449	0.06115	0.0474	0	0.4136	0.70199	8.99162	0	0.00331
INA	FLAT1	2003-11-02	1	Flathead	47.7734	-114.269	1580	4.59214	3.2801	6.59415	0.26321	0.387	2.2304	7.0578	9.2882	0.33953	0.2632	0.0154	0.6725	1.01227	38.5611	0	0.0126
INA	FLAT1	2003-11-05	1	Flathead	47.7734	-114.269	1580	7.1323	5.0945	9.99644	0.12497	0.376	2.2136	10.5765	12.7901	0.64977	0.5037	0.0161	1.2101	1.7134	59.4773	0	0.00338
INA	FLAT1	2003-11-08	1	Flathead	47.7734	-114.269	1580	4.0936	2.924	5.8496	0.09928	0.27	1.5133	6.2075	7.7208	0.67557	0.5237	0.0223	0.5176	0.71115	35.1831	0	0.00482
INA	FLAT1	2003-11-11	1	Flathead	47.7734	-114.269	1580	0.71834	0.5131	1.03477	0.05027	0.0943	0.9175	0.9452	1.8627	0.0267	0.0207	0	0.0797	0.14516	6.28871	0	0.00235
INA	FLAT1	2003-11-14	1	Flathead	47.7734	-114.269	1580	5.18154	3.7011	7.03734	0.13921	0.3224	1.6607	7.6275	9.2882	0.70382	0.5456	0.0166	0.5382	0.69036	40.2685	0	0.00987
INA	FLAT1	2003-11-17	1	Flathead	47.7734	-114.269	1580	0.9261	0.6615	1.31139	0.05161	0.0964	1.5608	1.4456	3.0064	0.08527	0.0661	0	0.091	0.15201	8.24042	0	0.00424
INA	FLAT1	2003-11-20	1	Flathead	47.7734	-114.269	1580	-999	-999	-999	-999	-999	-999	-999	-999	-999	-999	-999	-999	-999	-999	-999	-999
INA	FLAT1	2003-11-23	1	Flathead	47.7734	-114.269	1580	1.70898	1.2207	2.76582	0.01509	0.1356	0.545	3.0364	3.5814	0.29219	0.2265	0.0167	0.3558	0.61396	18.402	0	0.00177
INA	FLAT1	2003-11-26	1	Flathead	47.7734	-114.269	1580	0.29652	0.2118	0.59738	0.03006	0.0338	0.2391	0.6236	0.8627	0.09288	0.072	0	0.0852	0.14413	4.27861	0	0.00291
INA	FLAT1	2003-11-29	1	Flathead	47.7734	-114.269	1580	0.16926	0.1209	0.386	0.03926	0.0337	0.3199	0.4517	0.7716	0.01084	0.0084	0	0.0748	0.13295	2.81106	0	0.00237
INA	FLAT1	2003-12-02	1	Flathead	47.7734	-114.269	1580	0.79674	0.5691	1.16218	0.07732	0.0592	0.1939	1.0921	1.286	0.09997	0.0775	0.0161	0.0753	0.12895	6.49992	0	0.00099
INA	FLAT1	2003-12-05	1	Flathead	47.7734	-114.269	1580	0.81676	0.5834	1.30581	0.13857	0.0633	1.0859	1.2289	2.3148	0.06992	0.0542	0.0169	0.1291	0.21726	7.86063	0	0.00746
INA	FLAT1	2003-12-08	1	Flathead	47.7734	-114.269	1580	0.97412	0.6958	1.69312	0.01428	0.0703	0.2525	1.5369	1.7894	0.40648	0.3151	0.019	0.1214	0.22795	11.7693	0	0.00173
INA	FLAT1	2003-12-11	1	Flathead	47.7734	-114.269	1580	1.40896	1.0064	2.46783	0.0729	0.1623	0.1325	2.2959	2.4284	0.44066	0.3416	0.0216	0.2307	0.38301	16.5046	0	0.00533
INA	FLAT1	2003-12-14	1	Flathead	47.7734	-114.269	1580	0.12292	0.0878	0.26976	0.04377	0.0097	0.3229	0.1429	0.4658	0.03702	0.0287	0.0229	0.0281	0.05635	1.857	0	0.00065
INA	FLAT1	2003-12-17	1	Flathead	47.7734	-114.269	1580	0.18186	0.1299	0.78127	0.11793	0.0288	0.4902	0.8469	1.3371	0.06605	0.0512	0.0274	0.2146	0.38664	6.42512	0	0.0067
INA	FLAT1	2003-12-20	1	Flathead	47.7734	-114.269	1580	0.92652	0.6618	1.70055	0.08103	0.0864	0.2799	1.4348	1.7147	0.40287	0.3123	0.0182	0.1511	0.20373	11.5159	0	0.00401
INA	FLAT1	2003-12-23	1	Flathead	47.7734	-114.269	1580	1.54252	1.1018	2.47054	0.09258	0.0911	0.6	1.5659	2.1659	0.48814	0.3784	0.017	0.1475	0.2562	15.7512	0	0.00562
INA	FLAT1	2003-12-26	1	Flathead	47.7734	-114.269	1580	0.2275	0.1625	0.52049	0.0075	0.0292	0.3419	0.5102	0.8521	0.0476	0.0369	0	0.0988	0.20868	4.24403	0	0.00043
INA	FLAT1	2003-12-29	1	Flathead	47.7734	-114.269	1580	0.35672	0.2548	0.89491	0.06799	0.0455	0.2284	0.8068	1.0352	0.11932	0.0925	0.0143	0.1604	0.30537	6.77559	0	0.00122
INA	FLAT1	2004-01-01	1	Flathead	47.7734	-114.269	1580	0.41944	0.2996	1.21598	0.05499	0.0476	0.7645	1.1765	1.941	0.13093	0.1015	0.0178	0.3275	0.56302	10.2871	0	0.00217
INA	FLAT1	2004-01-04	1	Flathead	47.7734	-114.269	1580	0.60578	0.4327	1.62781	0.10956	0.0744	0.1774	1.7007	1.8781	0.1579	0.1224	0.0183	0.3955	0.68017	12.5851	0	0.00258
INA	FLAT1	2004-01-07	1	Flathead	47.7734	-114.269	1580	-999	-999	-999	-999	-999	-999	-999	-999	-999	-999	-999	-999	-999	-999	-999	-999
INA	FLAT1	2004-01-10	1	Flathead	47.7734	-114.269	1580	0.60312	0.4308	1.02138	0.06813	0.0595	0.4202	0.9431	1.3633	0.07456	0.0578	0.0056	0.2108	0.21607	6.51884	0	0.00307
INA	FLAT1	2004-01-13	1	Flathead	47.7734	-114.269	1580	0.574	0.41	1.11856	0.0634	0.0452	0.6386	1.2541	1.8927	0.12229	0.0948	0.0062	0.1399	0.31367	7.98137	0	0.00385
INA	FLAT1	2004-01-16	1	Flathead	47.7734	-114.269	1580	0.5257	0.3755	0.69928	0.02383	0.0169	0.1059	0.5716	0.6775	0.04412	0.0342	0.0065	0.0582	0.08873	3.81783	0	0.00049
INA	FLAT1	2004-01-19	1	Flathead	47.7734	-114.269	1580	0.5215	0.3725	0.69455	0.00617	0.0367	0.1143	0.5716	0.6859	0.04154	0.0322	0.0076	0.0467	0.08865	3.95717	0.00143	0.00044
INA	FLAT1	2004-01-22	1	Flathead	47.7734	-114.269	1580	0.3332	0.238	0.5643	0.01915	0.0448	0.1409	0.5408	0.6817	0.07211	0.0559	0.0327	0.0597	0.09504	3.71981	0	0.00497
INA	FLAT1	2004-01-25	1	Flathead	47.7734	-114.269	1580	0.47432	0.3388	1.43506	0.03061	0.0711	0.2381	1.1765	1.4146	0.37823	0.2932	0.0149	0.306	0.48081	12.214	0	0.00161
INA	FLAT1	2004-01-28	1	Flathead	47.7734	-114.269	1580	-999	-999	-999	-999	-999	-999	-999	-999	-999	-999	-999	-999	-999	-999	-999	-999
INA	FLAT1	2004-01-31	1	Flathead	47.7734	-114.269	1580	0.0434	0.031	0.29456	0.00929	0	0.2758	0.4017	0.6775	0.09675	0.075	-0.014	0.0866	0.14512	3.00408	0	0.00084
INA	FLAT1	2004-02-03	1	Flathead	47.7734	-114.269	1580	0.96852	0.6918	2.24806	0.06946	0.0827	1.0828	1.8269	2.9097	0.79606	0.6171	0.0066	0.2075	0.33132	16.1754	0	0.0041
INA	FLAT1	2004-02-06	1	Flathead	47.7734	-114.269	1580	0.3752	0.268	0.84751	0.04528	0.0333	0.19	0.8751	1.0651	0.11855	0.0919	0.0081	0.1577	0.27518	5.74926	0.00278	0.00209
INA	FLAT1	2004-02-09	1	Flathead	47.7734	-114.269	1580	0.39998	0.2857	0.9242	0.05255	0.0301	0.2117	1.0163	1.228	0.13455	0.1043	0.0134	0.1908	0.30702	6.29308	0	0.00174
INA	FLAT1	2004-02-12	1	Flathead	47.7734	-114.269	1580	0.97426	0.6959	2.55214	0.07942	0.102	0.8469	2.2019	3.0488	0.61984	0.4805	0.0247	0.4957	0.77661	18.8268	0	0.00361
INA	FLAT1	2004-02-15	1	Flathead	47.7734	-114.269	1580	0.42014	0.3001	1.22505	0.06811	0.0332	0.5743	1.0771	1.6514	0.3274	0.2538	0.001	0.2253	0.3762	9.13761	0	0.00255
INA	FLAT1	2004-02-18	1	Flathead	47.7734	-114.269	1580	0.25508	0.1822	0.43428	0.02915	0.0545	0.2229	0.1138	0.3367	0.04076	0.0316	-0.0167	0.0369	0.05478	2.6397	0	0.00139
INA	FLAT1	2004-02-21	1	Flathead	47.7734	-114.269	1580	0.71638	0.5117	1.44452	0.05508	0.053	0.5489	1.2188	1.7677	0.25607	0.1985	0.0009	0.2574	0.36399	9.69527	0	0.00283
INA	FLAT1	2004-02-24	1	Flathead	47.7734	-114.269	1580	0.86156	0.6154	1.89862	0.08341	0.0538	0.4347	1.8194	2.2541	0.35307	0.2737	0.0018	0.4062	0.54677	12.913	0	0.00387
INA	FLAT1	2004-02-27	1	Flathead	47.7734	-114.269	1580	0.1582	0.113	0.4114	0.02657	0.0056	0	0.3985	-0.0416	0.06527	0.0506	-0.0016	0.124	0.15576	2.82403	0	0.00155
INA	FLAT1	2004-03-01	1	Flathead	47.7734	-114.269	1580	1.69568	1.2112	3.06438	0.16424	0.1639	0.859	2.3622	3.2212	0.4942	0.3831	0.0078	0.3529	0.54636	18.0293	0	0.00544
INA	FLAT1	2004-03-04	1	Flathead	47.7734	-114.269	1580	0.21322	0.1523	0.78075	0.08219	0.0452	0	0.4878	0.4686	0.20498	0.1589	0.0185	0.1665	0.23517	5.16353	0	0.00224
INA	FLAT1	2004-03-07	1	Flathead	47.7734	-114.269	1580	0.20678	0.1477	2.36124	0.54029	0.0683	1.8671	2.4943	4.3614	0.22665	0.1757	0.0013	0.9546	1.31922	16.4342	0	0.02652
INA	FLAT1	2004-03-10	1	Flathead	47.7734	-114.269	1580	0.65338	0.4667	1.69677	0.30986	0.0678	1.2835	1.85	3.1335	0.14796	0.1147	0.0603	0.363	0.51777	10.0835	0	0.01515
INA	FLAT1	2004-03-13	1	Flathead	47.7734	-114.269	1580	0.59248	0.4232	1.05332	0.07019	0.0679	0.4175	1.2339	1.6514	0.10036	0.0778	0.0015	0.1417	0.22238	6.13873	0	0.00441
INA	FLAT1	2004-03-16	1	Flathead	47.7734	-114.269	1580	0.6972	0.498	2.04724	0.44494	0.0802	3.1875	1.9676	5.1551	0.23065	0.1788	0.002	0.3554	0.59425	13.0259	0	0.02664
INA	FLAT1	2004-03-19	1	Flathead	47.7734	-114.269	1580	0.13832	0.0988	0.91788	0.26381	0.0274	1.8061	1.2188	3.0249	0.14474	0.1122	0.0081	0.2331	0.34361	6.3648	0	0.01545
INA	FLAT1	2004-03-22	1	Flathead	47.7734	-114.269	1580	3.07748	2.1982	5.18737	0.71194	0.1695	6.3365	5.763	12.0995	0.62307	0.483	0.0049	0.4035	0.60539	29.0589	0	0.03683
INA	FLAT1	2004-03-25	1	Flathead	47.7734	-114.269	1580	0.40446	0.2889	1.78893	0.64951	0.0555	6.6643	2.1433	8.8076	0.26122	0.2025	0.0017	0.3168	0.41823	12.6507	0	0.03726
INA	FLAT1	2004-03-28	1	Flathead	47.7734	-114.269	1580	0.392	0.28	0.95686	0.1879	0.0522	1.1616	1.0403	2.2019	0.09198	0.0713	0.0454	0.152	0.23277	5.76123	0	0.00923
[truncated: 92 more rows]

## Sheet: IMPROVE doc
Program	Code	StartDate	EndDate	DataFrequency	NumRecords
IMPROVE Network Aerosol	INA	1988-03-02	2004-08-31	Daily	8999824
	SNAME	LAT	LON	ELEV
[truncated: 93 more rows]

## Sheet: PM10 Kalispell
1
[truncated: 3,413 more rows]

## Sheet: Whitefish precip
SITEDESC	COLDATE	HOUR	VARIABLE	L	VALUE		SITEDESC	COLDATE	HOUR	VARIABLE	L	VALUE		N and P in ug/L		Two bulk precipitation sites on Whitefish Lake: Whitefish South and Whitefish North
[truncated: 47 more rows]

[truncated: 1 more sheets: Swan precip]
